# Supplementary material for: Tris(m2-carbonyl)-octacarbonyl-triphenylphosphite-tetracobalt
Source: Preprints.org preprint supplement (doi:10.20944/preprints202207.0367.v1), 2022-07-25
Supplement: Supplementary file 1 [file supplementary]

### Supporting Materials

### Tris(m2-carbonyl)-octacarbonyl-triphenylphosphite-tetracobalt

**Isabelle Jourdain, Michael Knorr, Carsten Strohmann and Rebecca Scheel**


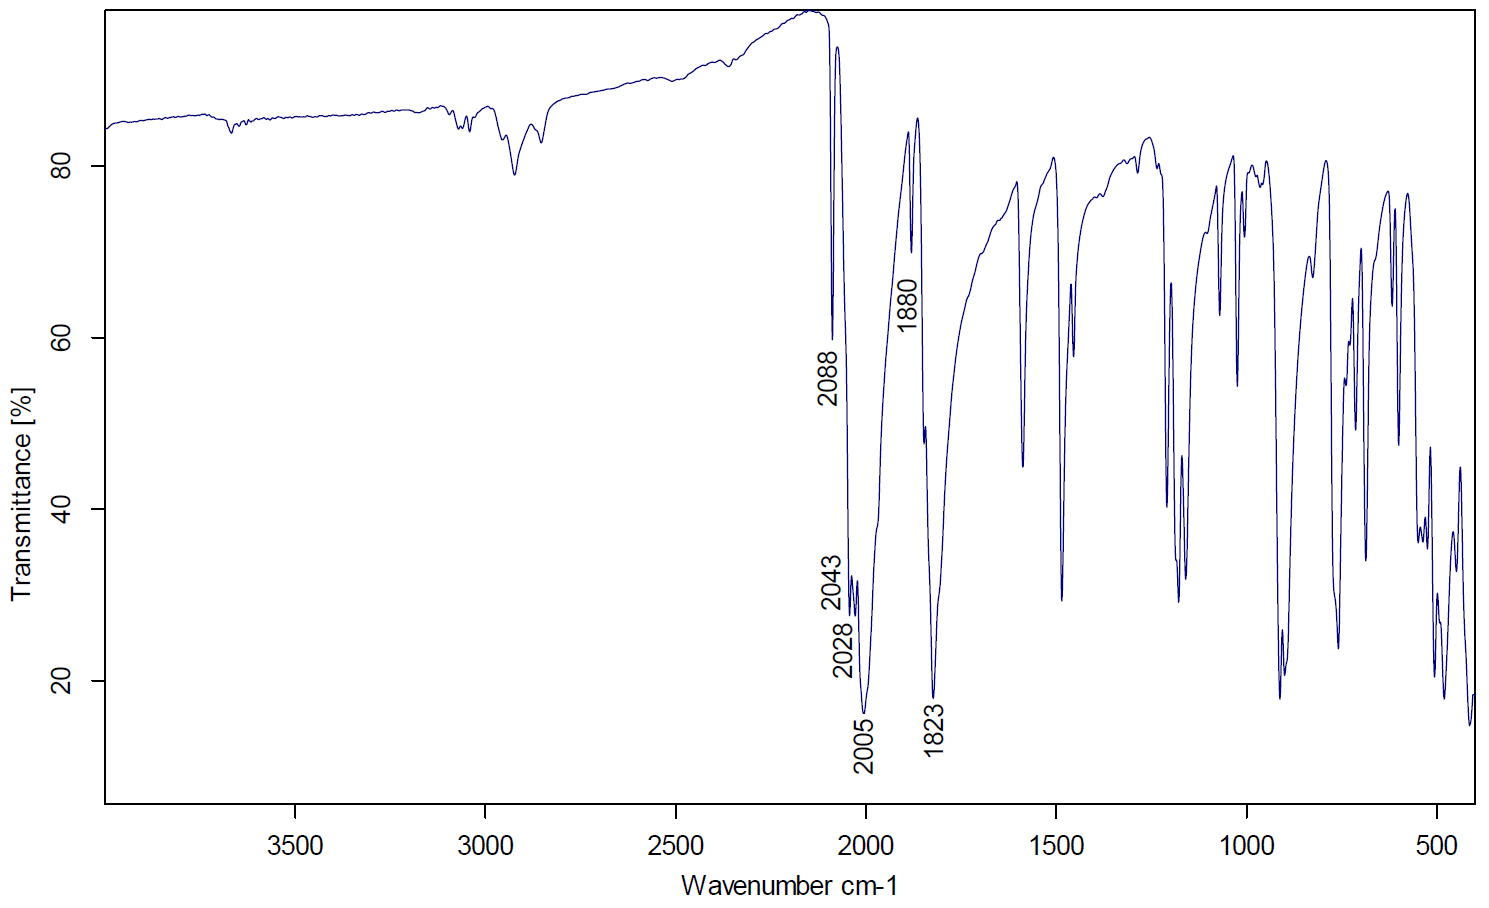


**Figure S1.** IR ATR spectrum of compound **2**.
