# Supplementary material for: Tris(m2-carbonyl)-octacarbonyl-triphenylphosphite-tetracobalt
Source: Preprints.org preprint supplement (doi:10.20944/preprints202207.0367.v1), 2022-07-25
Supplement: Supplementary file 3 [file supplementary]

Archive with 13 entries (10 files):
- Supporting Material Knorr Co4P/
- Supporting Material Knorr Co4P/B1959_tables.docx
- __MACOSX/
- __MACOSX/Supporting Material Knorr Co4P/
- __MACOSX/Supporting Material Knorr Co4P/._B1959_tables.docx
- Supporting Material Knorr Co4P/SM molbank Knorr.docx
- __MACOSX/Supporting Material Knorr Co4P/._SM molbank Knorr.docx
- Supporting Material Knorr Co4P/mo_B1959_0m.cif
- __MACOSX/Supporting Material Knorr Co4P/._mo_B1959_0m.cif
- Supporting Material Knorr Co4P/mo_B1959_0m_cifreport.pdf
- __MACOSX/Supporting Material Knorr Co4P/._mo_B1959_0m_cifreport.pdf
- Supporting Material Knorr Co4P/compound 2.mol
- __MACOSX/Supporting Material Knorr Co4P/._compound 2.mol
