# Supplementary material for: Tris(m2-carbonyl)-octacarbonyl-triphenylphosphite-tetracobalt
Source: Preprints.org preprint supplement (doi:10.20944/preprints202207.0367.v1), 2022-07-25
Supplement: Supplementary file 3 [file supplementary › Supporting Material Knorr Co4P/compound 2.mol]

Untitled Document-2
  ChemDraw07212217502D

 48 56  0  0  0  0  0  0  0  0999 V2000
   -2.4878    1.4726    0.0000 C   0  0  0  0  0  0  0  0  0  0  0  0
   -2.6103   -0.1752    0.0000 Co  0  0  0  0  0  0  0  0  0  0  0  0
   -1.5585    2.8051    0.0000 Co  0  0  0  0  0  0  0  0  0  0  0  0
    0.6622   -0.3505    0.0000 Co  0  0  0  0  0  0  0  0  0  0  0  0
   -1.7687   -1.2269    0.0000 C   0  0  0  0  0  0  0  0  0  0  0  0
    1.9406    1.0013    0.0000 C   0  0  0  0  0  0  0  0  0  0  0  0
    2.9079    1.2213    0.0000 O   0  0  0  0  0  0  0  0  0  0  0  0
   -3.2067    1.8338    0.0000 O   0  0  0  0  0  0  0  0  0  0  0  0
   -2.0826   -2.2961    0.0000 O   0  0  0  0  0  0  0  0  0  0  0  0
    0.2596    1.6558    0.0000 Co  0  0  0  0  0  0  0  0  0  0  0  0
    1.3338    0.5816    0.0000 C   0  0  0  0  0  3  0  0  0  0  0  0
    1.9152    0.0003    0.0000 O   0  0  0  0  0  0  0  0  0  0  0  0
    1.5154   -1.6728    0.0000 P   0  0  0  0  0  0  0  0  0  0  0  0
    1.8908   -0.9414    0.0000 O   0  0  0  0  0  0  0  0  0  0  0  0
    2.7119   -0.9008    0.0000 C   0  0  0  0  0  0  0  0  0  0  0  0
    3.1576   -1.5916    0.0000 C   0  0  0  0  0  0  0  0  0  0  0  0
    3.9788   -1.5510    0.0000 C   0  0  0  0  0  0  0  0  0  0  0  0
    4.3542   -0.8195    0.0000 C   0  0  0  0  0  0  0  0  0  0  0  0
    3.9084   -0.1287    0.0000 C   0  0  0  0  0  0  0  0  0  0  0  0
    3.0873   -0.1693    0.0000 C   0  0  0  0  0  0  0  0  0  0  0  0
    0.6942   -1.7134    0.0000 O   0  0  0  0  0  0  0  0  0  0  0  0
    0.2485   -1.0226    0.0000 C   0  0  0  0  0  0  0  0  0  0  0  0
    0.6239   -0.2912    0.0000 C   0  0  0  0  0  0  0  0  0  0  0  0
    0.1782    0.3997    0.0000 C   0  0  0  0  0  0  0  0  0  0  0  0
   -0.6430    0.3591    0.0000 C   0  0  0  0  0  0  0  0  0  0  0  0
   -1.0184   -0.3724    0.0000 C   0  0  0  0  0  0  0  0  0  0  0  0
   -0.5726   -1.0632    0.0000 C   0  0  0  0  0  0  0  0  0  0  0  0
    1.9611   -2.3636    0.0000 O   0  0  0  0  0  0  0  0  0  0  0  0
    1.5857   -3.0950    0.0000 C   0  0  0  0  0  0  0  0  0  0  0  0
    0.7646   -3.1356    0.0000 C   0  0  0  0  0  0  0  0  0  0  0  0
    0.3892   -3.8671    0.0000 C   0  0  0  0  0  0  0  0  0  0  0  0
    0.8349   -4.5579    0.0000 C   0  0  0  0  0  0  0  0  0  0  0  0
    1.6560   -4.5173    0.0000 C   0  0  0  0  0  0  0  0  0  0  0  0
    2.0314   -3.7859    0.0000 C   0  0  0  0  0  0  0  0  0  0  0  0
   -2.7421    3.4054    0.0000 C   0  0  0  0  0  3  0  0  0  0  0  0
   -3.4753    3.7772    0.0000 O   0  0  0  0  0  0  0  0  0  0  0  0
   -3.6650    0.5110    0.0000 C   0  0  0  0  0  3  0  0  0  0  0  0
   -4.3542    0.9594    0.0000 O   0  0  0  0  0  0  0  0  0  0  0  0
   -3.1088   -1.4912    0.0000 C   0  0  0  0  0  3  0  0  0  0  0  0
   -3.4000   -2.2600    0.0000 O   0  0  0  0  0  0  0  0  0  0  0  0
    1.8223   -0.0497    0.0000 C   0  0  0  0  0  3  0  0  0  0  0  0
    2.6182    0.1566    0.0000 O   0  0  0  0  0  0  0  0  0  0  0  0
   -0.8881    3.8634    0.0000 C   0  0  0  0  0  3  0  0  0  0  0  0
   -0.4482    4.5579    0.0000 O   0  0  0  0  0  0  0  0  0  0  0  0
   -2.5983    2.8051    0.0000 C   0  0  0  0  0  3  0  0  0  0  0  0
   -3.4204    2.8051    0.0000 O   0  0  0  0  0  0  0  0  0  0  0  0
    0.7914    2.7548    0.0000 C   0  0  0  0  0  3  0  0  0  0  0  0
    1.1495    3.4949    0.0000 O   0  0  0  0  0  0  0  0  0  0  0  0
 10  1  1  0      
  3 10  1  1      
 10  4  1  1      
  3  2  1  1      
 10  2  1  1      
  4  2  1  1      
  3  4  1  1      
  2  5  1  0      
  5  4  1  0      
  4  6  1  0      
  6 10  1  0      
  1  2  1  0      
  6  7  2  0      
  1  8  2  0      
  5  9  2  0      
 10 11  1  0      
 11 12  2  0      
  4 13  1  0      
 13 14  1  0      
 13 21  1  0      
 13 28  1  0      
 14 15  1  0      
 15 16  2  0      
 16 17  1  0      
 17 18  2  0      
 18 19  1  0      
 19 20  2  0      
 15 20  1  0      
 21 22  1  0      
 22 23  2  0      
 23 24  1  0      
 24 25  2  0      
 25 26  1  0      
 26 27  2  0      
 22 27  1  0      
 28 29  1  0      
 29 30  2  0      
 30 31  1  0      
 31 32  2  0      
 32 33  1  0      
 33 34  2  0      
 29 34  1  0      
  3 35  1  0      
 35 36  2  0      
  2 37  1  0      
 37 38  2  0      
  2 39  1  0      
 39 40  2  0      
  4 41  1  0      
 41 42  2  0      
  3 43  1  0      
 43 44  2  0      
  3 45  1  0      
 45 46  2  0      
 10 47  1  0      
 47 48  2  0      
M  STY  1   1 SUP
M  SLB  1   1   1
M  SAL   1  2  11  12
M  SBL   1  1  16
M  SMT   1 CO
M  SCL   1  
M  SBV   1  16   -1.0742    1.0742
M  STY  1   2 SUP
M  SLB  1   2   2
M  SAL   2 15  13  14  15  16  17  18  19  20  21  22  23  24  25  26  27
M  SAL   2  7  28  29  30  31  32  33  34
M  SBL   2  1  18
M  SMT   2 P(OPh)3
M  SCL   2  
M  SBV   2  18   -0.8532    1.3223
M  STY  1   3 SUP
M  SLB  1   3   3
M  SAL   3  2  35  36
M  SBL   3  1  43
M  SMT   3 ^CO
M  SCL   3  
M  SBV   3  43    1.1836   -0.6002
M  STY  1   4 SUP
M  SLB  1   4   4
M  SAL   4  2  37  38
M  SBL   4  1  45
M  SMT   4 ^CO
M  SCL   4  
M  SBV   4  45    1.0547   -0.6862
M  STY  1   5 SUP
M  SLB  1   5   5
M  SAL   5  2  39  40
M  SBL   5  1  47
M  SMT   5 ^CO
M  SCL   5  
M  SBV   5  47    0.4984    1.3160
M  STY  1   6 SUP
M  SLB  1   6   6
M  SAL   6  2  41  42
M  SBL   6  1  49
M  SMT   6 CO
M  SCL   6  
M  SBV   6  49   -1.1602   -0.3008
M  STY  1   7 SUP
M  SLB  1   7   7
M  SAL   7  2  43  44
M  SBL   7  1  51
M  SMT   7 CO
M  SCL   7  
M  SBV   7  51   -0.6703   -1.0582
M  STY  1   8 SUP
M  SLB  1   8   8
M  SAL   8  2  45  46
M  SBL   8  1  53
M  SMT   8 ^CO
M  SCL   8  
M  SBV   8  53    1.0398    0.0000
M  STY  1   9 SUP
M  SLB  1   9   9
M  SAL   9  2  47  48
M  SBL   9  1  55
M  SMT   9 CO
M  SCL   9  
M  SBV   9  55   -0.5318   -1.0990
M  END
