# Supplementary material for: Tris(m2-carbonyl)-octacarbonyl-triphenylphosphite-tetracobalt
Source: Preprints.org preprint supplement (doi:10.20944/preprints202207.0367.v1), 2022-07-25
Supplement: Supplementary file 3 [file supplementary › Supporting Material Knorr Co4P/mo_B1959_0m.cif]

data_mo_b1959_0m
_audit_creation_date               2020-09-14
_audit_creation_method
;
Olex2 1.3-alpha
(compiled 2020.07.16 svn.r6f6c53a7 for OlexSys, GUI svn.r6139)
;
_shelx_SHELXL_version_number       '2018/3'
_audit_contact_author_address      ?
_audit_contact_author_email        ?
_audit_contact_author_name         ''
_audit_contact_author_phone        ?
_publ_contact_author_id_orcid      ?
_publ_section_references
;
Dolomanov, O.V., Bourhis, L.J., Gildea, R.J, Howard, J.A.K. & Puschmann, H.
 (2009), J. Appl. Cryst. 42, 339-341.

Sheldrick, G.M. (2008). Acta Cryst. A64, 112-122.

Sheldrick, G.M. (2015). Acta Cryst. A71, 3-8.
;
_chemical_name_common              ?
_chemical_name_systematic          ?
_chemical_formula_moiety           'C29 H15 Co4 O14 P'
_chemical_formula_sum              'C29 H15 Co4 O14 P'
_chemical_formula_weight           854.10
_chemical_melting_point            ?
loop_
  _atom_type_symbol
  _atom_type_description
  _atom_type_scat_dispersion_real
  _atom_type_scat_dispersion_imag
  _atom_type_scat_source
 'C' 'C' 0.0033 0.0016 'International Tables Vol C Tables 4.2.6.8 and 6.1.1.4'
 'H' 'H' 0.0000 0.0000 'International Tables Vol C Tables 4.2.6.8 and 6.1.1.4'
 'Co' 'Co' 0.3494 0.9721 'International Tables Vol C Tables 4.2.6.8 and 6.1.1.4'
 'O' 'O' 0.0106 0.0060 'International Tables Vol C Tables 4.2.6.8 and 6.1.1.4'
 'P' 'P' 0.1023 0.0942 'International Tables Vol C Tables 4.2.6.8 and 6.1.1.4'

_shelx_space_group_comment
;
The symmetry employed for this shelxl refinement is uniquely defined
by the following loop, which should always be used as a source of
symmetry information in preference to the above space-group names.
They are only intended as comments.
;
_space_group_crystal_system        'monoclinic'
_space_group_IT_number             14
_space_group_name_H-M_alt          'P 1 21/c 1'
_space_group_name_Hall             '-P 2ybc'
loop_
  _space_group_symop_operation_xyz
 'x, y, z'
 '-x, y+1/2, -z+1/2'
 '-x, -y, -z'
 'x, -y-1/2, z-1/2'

_cell_length_a                     12.5987(10)
_cell_length_b                     8.9773(9)
_cell_length_c                     27.953(2)
_cell_angle_alpha                  90
_cell_angle_beta                   96.829(3)
_cell_angle_gamma                  90
_cell_volume                       3139.2(5)
_cell_formula_units_Z              4
_cell_measurement_reflns_used      2649
_cell_measurement_temperature      100.0
_cell_measurement_theta_max        26.14
_cell_measurement_theta_min        2.32
_shelx_estimated_absorpt_T_max     0.734
_shelx_estimated_absorpt_T_min     0.491
_exptl_absorpt_coefficient_mu      2.198
_exptl_absorpt_correction_T_max    0.5658
_exptl_absorpt_correction_T_min    0.4790
_exptl_absorpt_correction_type     multi-scan
_exptl_absorpt_process_details
;
SADABS-2016/2 (Bruker,2016/2) was used for absorption correction.
wR2(int) was 0.0980 before and 0.0467 after correction.
The Ratio of minimum to maximum transmission is 0.8484.
The \l/2 correction factor is Not present.
;
_exptl_absorpt_special_details     ?
_exptl_crystal_colour              brown
_exptl_crystal_colour_lustre       .
_exptl_crystal_colour_modifier     .
_exptl_crystal_colour_primary      brown
_exptl_crystal_density_diffrn      1.807
_exptl_crystal_density_meas        ?
_exptl_crystal_density_method      ?
_exptl_crystal_description         plate
_exptl_crystal_F_000               1696
_exptl_crystal_size_max            0.377
_exptl_crystal_size_mid            0.194
_exptl_crystal_size_min            0.15
_exptl_transmission_factor_max     ?
_exptl_transmission_factor_min     ?
_diffrn_reflns_av_R_equivalents    0.0294
_diffrn_reflns_av_unetI/netI       0.0190
_diffrn_reflns_Laue_measured_fraction_full  0.998
_diffrn_reflns_Laue_measured_fraction_max  0.999
_diffrn_reflns_limit_h_max         19
_diffrn_reflns_limit_h_min         -19
_diffrn_reflns_limit_k_max         13
_diffrn_reflns_limit_k_min         -13
_diffrn_reflns_limit_l_max         39
_diffrn_reflns_limit_l_min         -42
_diffrn_reflns_number              80869
_diffrn_reflns_point_group_measured_fraction_full  0.998
_diffrn_reflns_point_group_measured_fraction_max  0.999
_diffrn_reflns_theta_full          25.242
_diffrn_reflns_theta_max           33.147
_diffrn_reflns_theta_min           2.384
_diffrn_ambient_temperature        100.0
_diffrn_detector                   'Bruker APEX2 area detector'
_diffrn_detector_area_resol_mean   7.9
_diffrn_detector_type              'CCD area detector'
_diffrn_measured_fraction_theta_full  0.998
_diffrn_measured_fraction_theta_max  0.999
_diffrn_measurement_device         'three-circle diffractometer'
_diffrn_measurement_device_type    'Bruker SMART APEX2 area detector'
_diffrn_measurement_method         '\w and \f scans'
_diffrn_radiation_monochromator    'mirror optics'
_diffrn_radiation_probe            x-ray
_diffrn_radiation_type             MoK\a
_diffrn_radiation_wavelength       0.71073
_diffrn_source                     'microfocus sealed X-ray tube'
_diffrn_source_current             1.0
_diffrn_source_power               0.05
_diffrn_source_type                'Incoatec I\ms'
_diffrn_source_voltage             50.0
_diffrn_standards_number           0
_reflns_Friedel_coverage           0.000
_reflns_Friedel_fraction_full      .
_reflns_Friedel_fraction_max       .
_reflns_number_gt                  10539
_reflns_number_total               11959
_reflns_special_details
;
 Reflections were merged by SHELXL according to the crystal
 class for the calculation of statistics and refinement.
 
 _reflns_Friedel_fraction is defined as the number of unique
 Friedel pairs measured divided by the number that would be
 possible theoretically, ignoring centric projections and
 systematic absences.
;
_reflns_threshold_expression       'I > 2\s(I)'
_computing_cell_refinement         'SAINT V8.40A (Bruker, 2019)'
_computing_data_collection         ?
_computing_data_reduction          'SAINT V8.40A (Bruker, 2019)'
_computing_molecular_graphics      'Olex2 1.3-alpha (Dolomanov et al., 2009)'
_computing_publication_material    'Olex2 1.3-alpha (Dolomanov et al., 2009)'
_computing_structure_refinement    'XL  (Sheldrick, 2008)'
_computing_structure_solution      'XT  (Sheldrick, 2015)'
_refine_diff_density_max           3.318
_refine_diff_density_min           -0.670
_refine_diff_density_rms           0.103
_refine_ls_extinction_coef         .
_refine_ls_extinction_method       none
_refine_ls_goodness_of_fit_ref     1.035
_refine_ls_hydrogen_treatment      constr
_refine_ls_matrix_type             full
_refine_ls_number_parameters       433
_refine_ls_number_reflns           11959
_refine_ls_number_restraints       0
_refine_ls_R_factor_all            0.0421
_refine_ls_R_factor_gt             0.0360
_refine_ls_restrained_S_all        1.035
_refine_ls_shift/su_max            0.001
_refine_ls_shift/su_mean           0.000
_refine_ls_structure_factor_coef   Fsqd
_refine_ls_weighting_details      
 'w=1/[\s^2^(Fo^2^)+(0.0490P)^2^+4.4622P] where P=(Fo^2^+2Fc^2^)/3'
_refine_ls_weighting_scheme        calc
_refine_ls_wR_factor_gt            0.0957
_refine_ls_wR_factor_ref           0.1008
_refine_special_details            ?
_olex2_refinement_description
;
1. Fixed Uiso
 At 1.2 times of:
  All C(H) groups
2.a Aromatic/amide H refined with riding coordinates:
 C2(H2), C3(H3), C4(H4), C5(H5), C6(H6), C8(H8), C9(H9), C10(H10), C11(H11),
 C12(H12), C14(H14), C15(H15), C16(H16), C17(H17), C18(H18)
;
_atom_sites_solution_hydrogens     geom
_atom_sites_solution_primary       dual
_atom_sites_solution_secondary     ?
loop_
  _atom_site_label
  _atom_site_type_symbol
  _atom_site_fract_x
  _atom_site_fract_y
  _atom_site_fract_z
  _atom_site_U_iso_or_equiv
  _atom_site_adp_type
  _atom_site_occupancy
  _atom_site_site_symmetry_order
  _atom_site_calc_flag
  _atom_site_refinement_flags_posn
  _atom_site_refinement_flags_adp
  _atom_site_refinement_flags_occupancy
  _atom_site_disorder_assembly
  _atom_site_disorder_group
 Co1 Co 0.62872(2) 0.23508(3) 0.38985(2) 0.01556(5) Uani 1 1 d . . . . .
 Co2 Co 0.54871(2) 0.48553(3) 0.38136(2) 0.01633(5) Uani 1 1 d . . . . .
 Co3 Co 0.53192(2) 0.31457(3) 0.31258(2) 0.01613(5) Uani 1 1 d . . . . .
 Co4 Co 0.42955(2) 0.26106(3) 0.38251(2) 0.01810(5) Uani 1 1 d . . . . .
 P1 P 0.79714(4) 0.25863(5) 0.38469(2) 0.01638(8) Uani 1 1 d . . . . .
 O1 O 0.83391(11) 0.42360(15) 0.40153(5) 0.0216(2) Uani 1 1 d . . . . .
 O2 O 0.83479(11) 0.25138(16) 0.33191(5) 0.0213(3) Uani 1 1 d . . . . .
 O3 O 0.88626(10) 0.15282(16) 0.41271(5) 0.0215(2) Uani 1 1 d . . . . .
 O4 O 0.60329(14) 0.00391(17) 0.31530(6) 0.0303(3) Uani 1 1 d . . . . .
 O5 O 0.60933(14) -0.0153(2) 0.45468(8) 0.0462(5) Uani 1 1 d . . . . .
 O6 O 0.66335(12) 0.41886(19) 0.47671(5) 0.0268(3) Uani 1 1 d . . . . .
 O7 O 0.68557(12) 0.38869(18) 0.24514(6) 0.0271(3) Uani 1 1 d . . . . .
 O8 O 0.70640(13) 0.71713(19) 0.36804(6) 0.0326(3) Uani 1 1 d . . . . .
 O9 O 0.41648(12) 0.59723(16) 0.29583(5) 0.0247(3) Uani 1 1 d . . . . .
 O10 O 0.40535(14) 0.6718(2) 0.43050(6) 0.0320(3) Uani 1 1 d . . . . .
 O11 O 0.22916(12) 0.3928(2) 0.33603(6) 0.0335(3) Uani 1 1 d . . . . .
 O12 O 0.40994(14) 0.2876(2) 0.48679(6) 0.0317(3) Uani 1 1 d . . . . .
 O13 O 0.37272(16) -0.0568(2) 0.36623(7) 0.0394(4) Uani 1 1 d . . . . .
 O14 O 0.35494(13) 0.21312(18) 0.24338(6) 0.0286(3) Uani 1 1 d . . . . .
 C1 C 0.93506(14) 0.4860(2) 0.39859(7) 0.0210(3) Uani 1 1 d . . . . .
 C2 C 0.94881(18) 0.5751(3) 0.35957(8) 0.0293(4) Uani 1 1 d . . . . .
 H2 H 0.893028 0.587427 0.333862 0.035 Uiso 1 1 calc R U . . .
 C3 C 1.0468(2) 0.6465(3) 0.35897(11) 0.0391(5) Uani 1 1 d . . . . .
 H3 H 1.058106 0.708729 0.332548 0.047 Uiso 1 1 calc R U . . .
 C4 C 1.12805(19) 0.6277(3) 0.39648(11) 0.0390(6) Uani 1 1 d . . . . .
 H4 H 1.194305 0.677768 0.395814 0.047 Uiso 1 1 calc R U . . .
 C5 C 1.11280(17) 0.5363(3) 0.43487(10) 0.0355(5) Uani 1 1 d . . . . .
 H5 H 1.168957 0.522439 0.460327 0.043 Uiso 1 1 calc R U . . .
 C6 C 1.01504(16) 0.4643(2) 0.43629(8) 0.0261(4) Uani 1 1 d . . . . .
 H6 H 1.003698 0.401639 0.462606 0.031 Uiso 1 1 calc R U . . .
 C7 C 0.90695(14) 0.1517(2) 0.31480(6) 0.0197(3) Uani 1 1 d . . . . .
 C8 C 1.01563(16) 0.1678(2) 0.32808(9) 0.0282(4) Uani 1 1 d . . . . .
 H8 H 1.042165 0.241923 0.350642 0.034 Uiso 1 1 calc R U . . .
 C9 C 1.08550(17) 0.0729(3) 0.30765(9) 0.0314(4) Uani 1 1 d . . . . .
 H9 H 1.160363 0.082398 0.316476 0.038 Uiso 1 1 calc R U . . .
 C10 C 1.04739(19) -0.0341(3) 0.27497(8) 0.0337(5) Uani 1 1 d . . . . .
 H10 H 1.095509 -0.097728 0.260996 0.040 Uiso 1 1 calc R U . . .
 C11 C 0.9383(2) -0.0485(4) 0.26257(11) 0.0490(8) Uani 1 1 d . . . . .
 H11 H 0.911715 -0.123243 0.240235 0.059 Uiso 1 1 calc R U . . .
 C12 C 0.86701(19) 0.0450(3) 0.28237(9) 0.0390(6) Uani 1 1 d . . . . .
 H12 H 0.792143 0.035190 0.273616 0.047 Uiso 1 1 calc R U . . .
 C13 C 0.86853(13) 0.0574(2) 0.45062(6) 0.0179(3) Uani 1 1 d . . . . .
 C14 C 0.86544(15) -0.0938(2) 0.44159(7) 0.0229(3) Uani 1 1 d . . . . .
 H14 H 0.873733 -0.130985 0.410431 0.028 Uiso 1 1 calc R U . . .
 C15 C 0.84998(17) -0.1906(2) 0.47895(8) 0.0276(4) Uani 1 1 d . . . . .
 H15 H 0.846625 -0.294888 0.473225 0.033 Uiso 1 1 calc R U . . .
 C16 C 0.83945(16) -0.1360(2) 0.52435(8) 0.0265(4) Uani 1 1 d . . . . .
 H16 H 0.828920 -0.202699 0.549749 0.032 Uiso 1 1 calc R U . . .
 C17 C 0.84426(18) 0.0165(3) 0.53286(7) 0.0280(4) Uani 1 1 d . . . . .
 H17 H 0.837519 0.053876 0.564151 0.034 Uiso 1 1 calc R U . . .
 C18 C 0.85890(17) 0.1144(2) 0.49578(7) 0.0253(4) Uani 1 1 d . . . . .
 H18 H 0.862231 0.218779 0.501367 0.030 Uiso 1 1 calc R U . . .
 C19 C 0.59541(15) 0.1211(2) 0.33189(7) 0.0208(3) Uani 1 1 d . . . . .
 C20 C 0.62260(15) 0.0816(3) 0.43006(8) 0.0271(4) Uani 1 1 d . . . . .
 C21 C 0.63104(14) 0.3891(2) 0.43731(6) 0.0197(3) Uani 1 1 d . . . . .
 C22 C 0.64683(15) 0.6266(2) 0.37344(7) 0.0224(3) Uani 1 1 d . . . . .
 C23 C 0.62671(15) 0.3607(2) 0.27125(7) 0.0208(3) Uani 1 1 d . . . . .
 C24 C 0.47125(14) 0.5121(2) 0.31785(6) 0.0182(3) Uani 1 1 d . . . . .
 C25 C 0.46158(16) 0.5978(2) 0.41259(7) 0.0233(3) Uani 1 1 d . . . . .
 C26 C 0.30571(15) 0.3438(2) 0.35506(7) 0.0230(3) Uani 1 1 d . . . . .
 C27 C 0.41705(15) 0.2765(2) 0.44696(8) 0.0242(3) Uani 1 1 d . . . . .
 C28 C 0.39592(16) 0.0644(2) 0.37203(8) 0.0262(4) Uani 1 1 d . . . . .
 C29 C 0.42513(16) 0.2500(2) 0.26990(7) 0.0214(3) Uani 1 1 d . . . . .

loop_
  _atom_site_aniso_label
  _atom_site_aniso_U_11
  _atom_site_aniso_U_22
  _atom_site_aniso_U_33
  _atom_site_aniso_U_23
  _atom_site_aniso_U_13
  _atom_site_aniso_U_12
 Co1 0.01388(10) 0.01577(10) 0.01681(10) 0.00288(8) 0.00090(7) 0.00250(7)
 Co2 0.01721(10) 0.01600(10) 0.01539(10) -0.00028(7) 0.00037(8) 0.00212(8)
 Co3 0.01810(10) 0.01522(10) 0.01486(10) 0.00030(7) 0.00104(8) 0.00108(8)
 Co4 0.01529(10) 0.01980(11) 0.01915(11) 0.00304(8) 0.00180(8) 0.00091(8)
 P1 0.01477(17) 0.01712(19) 0.01720(18) 0.00182(14) 0.00177(14) 0.00255(14)
 O1 0.0175(5) 0.0188(6) 0.0292(7) -0.0020(5) 0.0051(5) 0.0000(4)
 O2 0.0210(6) 0.0256(7) 0.0177(6) 0.0023(5) 0.0039(5) 0.0068(5)
 O3 0.0163(5) 0.0262(7) 0.0221(6) 0.0081(5) 0.0023(4) 0.0049(5)
 O4 0.0411(9) 0.0194(6) 0.0297(7) -0.0019(5) 0.0008(6) 0.0070(6)
 O5 0.0236(7) 0.0494(11) 0.0651(13) 0.0388(10) 0.0033(8) 0.0026(7)
 O6 0.0262(7) 0.0367(8) 0.0166(6) -0.0018(5) -0.0015(5) 0.0072(6)
 O7 0.0288(7) 0.0277(7) 0.0259(7) 0.0007(6) 0.0075(5) -0.0018(6)
 O8 0.0309(8) 0.0254(7) 0.0387(9) 0.0027(6) -0.0076(6) -0.0064(6)
 O9 0.0295(7) 0.0217(6) 0.0218(6) 0.0023(5) -0.0011(5) 0.0055(5)
 O10 0.0375(8) 0.0349(8) 0.0244(7) -0.0019(6) 0.0073(6) 0.0151(7)
 O11 0.0214(7) 0.0389(9) 0.0388(9) -0.0007(7) -0.0027(6) 0.0059(6)
 O12 0.0333(8) 0.0369(8) 0.0251(7) 0.0015(6) 0.0048(6) -0.0039(7)
 O13 0.0477(10) 0.0263(8) 0.0428(10) 0.0031(7) -0.0007(8) -0.0048(7)
 O14 0.0305(7) 0.0265(7) 0.0271(7) -0.0029(6) -0.0040(6) -0.0051(6)
 C1 0.0175(7) 0.0181(7) 0.0275(8) -0.0035(6) 0.0037(6) 0.0004(6)
 C2 0.0287(9) 0.0257(9) 0.0343(10) 0.0045(8) 0.0067(8) -0.0007(7)
 C3 0.0362(12) 0.0277(11) 0.0567(15) 0.0032(10) 0.0198(11) -0.0052(9)
 C4 0.0246(9) 0.0268(10) 0.0673(17) -0.0146(11) 0.0134(10) -0.0066(8)
 C5 0.0215(9) 0.0331(11) 0.0503(14) -0.0174(10) -0.0019(9) 0.0009(8)
 C6 0.0235(8) 0.0261(9) 0.0279(9) -0.0069(7) -0.0001(7) 0.0026(7)
 C7 0.0189(7) 0.0228(8) 0.0178(7) 0.0022(6) 0.0043(6) 0.0041(6)
 C8 0.0190(8) 0.0252(9) 0.0414(11) -0.0038(8) 0.0074(7) -0.0014(7)
 C9 0.0198(8) 0.0301(10) 0.0462(12) 0.0015(9) 0.0118(8) 0.0016(7)
 C10 0.0338(11) 0.0403(12) 0.0280(10) -0.0014(9) 0.0077(8) 0.0156(9)
 C11 0.0396(13) 0.0620(18) 0.0417(14) -0.0306(13) -0.0096(11) 0.0187(13)
 C12 0.0266(10) 0.0527(15) 0.0350(11) -0.0202(11) -0.0079(8) 0.0111(10)
 C13 0.0139(6) 0.0201(7) 0.0191(7) 0.0027(6) -0.0007(5) 0.0027(5)
 C14 0.0220(8) 0.0216(8) 0.0247(8) -0.0031(6) 0.0004(6) 0.0022(6)
 C15 0.0264(9) 0.0185(8) 0.0374(11) 0.0034(7) 0.0012(8) 0.0017(7)
 C16 0.0221(8) 0.0285(9) 0.0285(9) 0.0101(7) 0.0012(7) 0.0014(7)
 C17 0.0342(10) 0.0306(10) 0.0193(8) 0.0013(7) 0.0037(7) -0.0018(8)
 C18 0.0319(9) 0.0207(8) 0.0238(8) -0.0018(7) 0.0054(7) -0.0010(7)
 C19 0.0220(8) 0.0178(7) 0.0225(8) 0.0008(6) 0.0024(6) 0.0017(6)
 C20 0.0161(7) 0.0302(10) 0.0343(10) 0.0124(8) 0.0009(7) 0.0040(7)
 C21 0.0167(7) 0.0249(8) 0.0176(7) 0.0021(6) 0.0023(5) 0.0036(6)
 C22 0.0228(8) 0.0212(8) 0.0219(8) 0.0006(6) -0.0026(6) 0.0024(6)
 C23 0.0216(7) 0.0177(7) 0.0225(8) 0.0008(6) 0.0004(6) 0.0006(6)
 C24 0.0207(7) 0.0173(7) 0.0168(7) 0.0001(5) 0.0026(6) -0.0007(6)
 C25 0.0252(8) 0.0262(9) 0.0176(7) -0.0003(6) -0.0011(6) 0.0053(7)
 C26 0.0205(7) 0.0238(8) 0.0247(8) -0.0004(7) 0.0025(6) -0.0002(6)
 C27 0.0186(7) 0.0277(9) 0.0266(9) 0.0061(7) 0.0034(6) 0.0006(7)
 C28 0.0244(8) 0.0276(9) 0.0267(9) 0.0067(7) 0.0026(7) 0.0010(7)
 C29 0.0253(8) 0.0179(7) 0.0206(8) -0.0011(6) 0.0009(6) 0.0008(6)

_geom_special_details
;
 All esds (except the esd in the dihedral angle between two l.s. planes)
 are estimated using the full covariance matrix.  The cell esds are taken
 into account individually in the estimation of esds in distances, angles
 and torsion angles; correlations between esds in cell parameters are only
 used when they are defined by crystal symmetry.  An approximate (isotropic)
 treatment of cell esds is used for estimating esds involving l.s. planes.
;
loop_
  _geom_bond_atom_site_label_1
  _geom_bond_atom_site_label_2
  _geom_bond_distance
  _geom_bond_site_symmetry_2
  _geom_bond_publ_flag
 Co1 Co2 2.4639(4) . ?
 Co1 Co3 2.4567(4) . ?
 Co1 Co4 2.5042(4) . ?
 Co1 P1 2.1542(5) . ?
 Co1 C19 1.9199(19) . ?
 Co1 C20 1.786(2) . ?
 Co1 C21 1.9138(19) . ?
 Co2 Co3 2.4494(4) . ?
 Co2 Co4 2.5154(4) . ?
 Co2 C21 1.9713(18) . ?
 Co2 C22 1.802(2) . ?
 Co2 C24 1.9360(18) . ?
 Co2 C25 1.792(2) . ?
 Co3 Co4 2.5129(4) . ?
 Co3 C19 1.9608(19) . ?
 Co3 C23 1.8057(19) . ?
 Co3 C24 1.9433(18) . ?
 Co3 C29 1.7854(19) . ?
 Co4 C26 1.814(2) . ?
 Co4 C27 1.832(2) . ?
 Co4 C28 1.831(2) . ?
 P1 O1 1.6054(15) . ?
 P1 O2 1.6038(14) . ?
 P1 O3 1.6022(14) . ?
 O1 C1 1.403(2) . ?
 O2 C7 1.400(2) . ?
 O3 C13 1.401(2) . ?
 O4 C19 1.159(2) . ?
 O5 C20 1.134(3) . ?
 O6 C21 1.159(2) . ?
 O7 C23 1.129(2) . ?
 O8 C22 1.128(3) . ?
 O9 C24 1.157(2) . ?
 O10 C25 1.131(2) . ?
 O11 C26 1.133(2) . ?
 O12 C27 1.132(3) . ?
 O13 C28 1.133(3) . ?
 O14 C29 1.134(2) . ?
 C1 C2 1.380(3) . ?
 C1 C6 1.383(3) . ?
 C2 H2 0.9500 . ?
 C2 C3 1.393(3) . ?
 C3 H3 0.9500 . ?
 C3 C4 1.385(4) . ?
 C4 H4 0.9500 . ?
 C4 C5 1.383(4) . ?
 C5 H5 0.9500 . ?
 C5 C6 1.396(3) . ?
 C6 H6 0.9500 . ?
 C7 C8 1.383(3) . ?
 C7 C12 1.373(3) . ?
 C8 H8 0.9500 . ?
 C8 C9 1.395(3) . ?
 C9 H9 0.9500 . ?
 C9 C10 1.372(4) . ?
 C10 H10 0.9500 . ?
 C10 C11 1.383(4) . ?
 C11 H11 0.9500 . ?
 C11 C12 1.392(3) . ?
 C12 H12 0.9500 . ?
 C13 C14 1.380(3) . ?
 C13 C18 1.381(3) . ?
 C14 H14 0.9500 . ?
 C14 C15 1.390(3) . ?
 C15 H15 0.9500 . ?
 C15 C16 1.382(3) . ?
 C16 H16 0.9500 . ?
 C16 C17 1.390(3) . ?
 C17 H17 0.9500 . ?
 C17 C18 1.388(3) . ?
 C18 H18 0.9500 . ?

loop_
  _geom_angle_atom_site_label_1
  _geom_angle_atom_site_label_2
  _geom_angle_atom_site_label_3
  _geom_angle
  _geom_angle_site_symmetry_1
  _geom_angle_site_symmetry_3
  _geom_angle_publ_flag
 Co2 Co1 Co4 60.830(10) . . ?
 Co3 Co1 Co2 59.707(9) . . ?
 Co3 Co1 Co4 60.859(10) . . ?
 P1 Co1 Co2 107.396(17) . . ?
 P1 Co1 Co3 107.614(16) . . ?
 P1 Co1 Co4 166.115(18) . . ?
 C19 Co1 Co2 111.05(6) . . ?
 C19 Co1 Co3 51.47(6) . . ?
 C19 Co1 Co4 82.19(6) . . ?
 C19 Co1 P1 96.55(6) . . ?
 C20 Co1 Co2 135.80(7) . . ?
 C20 Co1 Co3 136.34(7) . . ?
 C20 Co1 Co4 90.32(6) . . ?
 C20 Co1 P1 103.56(6) . . ?
 C20 Co1 C19 95.65(10) . . ?
 C20 Co1 C21 96.85(10) . . ?
 C21 Co1 Co2 51.68(5) . . ?
 C21 Co1 Co3 111.39(5) . . ?
 C21 Co1 Co4 85.53(5) . . ?
 C21 Co1 P1 92.38(6) . . ?
 C21 Co1 C19 162.49(8) . . ?
 Co1 Co2 Co4 60.377(11) . . ?
 Co3 Co2 Co1 60.000(11) . . ?
 Co3 Co2 Co4 60.798(11) . . ?
 C21 Co2 Co1 49.61(6) . . ?
 C21 Co2 Co3 109.61(6) . . ?
 C21 Co2 Co4 84.06(6) . . ?
 C22 Co2 Co1 111.99(6) . . ?
 C22 Co2 Co3 109.91(6) . . ?
 C22 Co2 Co4 169.73(6) . . ?
 C22 Co2 C21 95.87(8) . . ?
 C22 Co2 C24 94.55(8) . . ?
 C24 Co2 Co1 110.89(5) . . ?
 C24 Co2 Co3 50.98(5) . . ?
 C24 Co2 Co4 82.75(5) . . ?
 C24 Co2 C21 160.36(8) . . ?
 C25 Co2 Co1 137.19(7) . . ?
 C25 Co2 Co3 137.23(6) . . ?
 C25 Co2 Co4 92.47(7) . . ?
 C25 Co2 C21 98.95(8) . . ?
 C25 Co2 C22 97.68(9) . . ?
 C25 Co2 C24 96.10(8) . . ?
 Co1 Co3 Co4 60.505(11) . . ?
 Co2 Co3 Co1 60.293(11) . . ?
 Co2 Co3 Co4 60.899(11) . . ?
 C19 Co3 Co1 49.99(6) . . ?
 C19 Co3 Co2 110.16(6) . . ?
 C19 Co3 Co4 81.19(6) . . ?
 C23 Co3 Co1 109.40(6) . . ?
 C23 Co3 Co2 110.89(6) . . ?
 C23 Co3 Co4 168.88(6) . . ?
 C23 Co3 C19 95.74(8) . . ?
 C23 Co3 C24 97.78(8) . . ?
 C24 Co3 Co1 110.91(5) . . ?
 C24 Co3 Co2 50.72(5) . . ?
 C24 Co3 Co4 82.68(5) . . ?
 C24 Co3 C19 159.80(8) . . ?
 C29 Co3 Co1 138.50(6) . . ?
 C29 Co3 Co2 135.71(6) . . ?
 C29 Co3 Co4 92.41(7) . . ?
 C29 Co3 C19 98.43(8) . . ?
 C29 Co3 C23 98.63(9) . . ?
 C29 Co3 C24 94.30(8) . . ?
 Co1 Co4 Co2 58.793(10) . . ?
 Co1 Co4 Co3 58.636(10) . . ?
 Co3 Co4 Co2 58.303(10) . . ?
 C26 Co4 Co1 151.15(6) . . ?
 C26 Co4 Co2 98.69(7) . . ?
 C26 Co4 Co3 95.04(6) . . ?
 C26 Co4 C27 102.40(9) . . ?
 C26 Co4 C28 99.00(9) . . ?
 C27 Co4 Co1 97.41(6) . . ?
 C27 Co4 Co2 94.20(7) . . ?
 C27 Co4 Co3 149.60(6) . . ?
 C28 Co4 Co1 97.69(7) . . ?
 C28 Co4 Co2 153.83(7) . . ?
 C28 Co4 Co3 100.97(7) . . ?
 C28 Co4 C27 100.64(9) . . ?
 O1 P1 Co1 108.85(5) . . ?
 O2 P1 Co1 117.32(6) . . ?
 O2 P1 O1 101.57(8) . . ?
 O3 P1 Co1 123.20(6) . . ?
 O3 P1 O1 104.04(8) . . ?
 O3 P1 O2 99.15(7) . . ?
 C1 O1 P1 125.68(12) . . ?
 C7 O2 P1 127.99(12) . . ?
 C13 O3 P1 124.53(11) . . ?
 C2 C1 O1 118.54(18) . . ?
 C2 C1 C6 122.38(19) . . ?
 C6 C1 O1 118.93(18) . . ?
 C1 C2 H2 120.9 . . ?
 C1 C2 C3 118.1(2) . . ?
 C3 C2 H2 120.9 . . ?
 C2 C3 H3 119.6 . . ?
 C4 C3 C2 120.7(2) . . ?
 C4 C3 H3 119.6 . . ?
 C3 C4 H4 120.0 . . ?
 C5 C4 C3 120.1(2) . . ?
 C5 C4 H4 120.0 . . ?
 C4 C5 H5 119.9 . . ?
 C4 C5 C6 120.1(2) . . ?
 C6 C5 H5 119.9 . . ?
 C1 C6 C5 118.6(2) . . ?
 C1 C6 H6 120.7 . . ?
 C5 C6 H6 120.7 . . ?
 C8 C7 O2 120.28(18) . . ?
 C12 C7 O2 118.02(17) . . ?
 C12 C7 C8 121.56(19) . . ?
 C7 C8 H8 120.7 . . ?
 C7 C8 C9 118.6(2) . . ?
 C9 C8 H8 120.7 . . ?
 C8 C9 H9 119.6 . . ?
 C10 C9 C8 120.8(2) . . ?
 C10 C9 H9 119.6 . . ?
 C9 C10 H10 120.3 . . ?
 C9 C10 C11 119.4(2) . . ?
 C11 C10 H10 120.3 . . ?
 C10 C11 H11 119.6 . . ?
 C10 C11 C12 120.9(2) . . ?
 C12 C11 H11 119.6 . . ?
 C7 C12 C11 118.7(2) . . ?
 C7 C12 H12 120.6 . . ?
 C11 C12 H12 120.6 . . ?
 C14 C13 O3 117.82(17) . . ?
 C14 C13 C18 121.89(18) . . ?
 C18 C13 O3 120.24(17) . . ?
 C13 C14 H14 120.6 . . ?
 C13 C14 C15 118.73(18) . . ?
 C15 C14 H14 120.6 . . ?
 C14 C15 H15 119.8 . . ?
 C16 C15 C14 120.39(19) . . ?
 C16 C15 H15 119.8 . . ?
 C15 C16 H16 120.0 . . ?
 C15 C16 C17 119.97(19) . . ?
 C17 C16 H16 120.0 . . ?
 C16 C17 H17 119.9 . . ?
 C18 C17 C16 120.20(19) . . ?
 C18 C17 H17 119.9 . . ?
 C13 C18 C17 118.80(19) . . ?
 C13 C18 H18 120.6 . . ?
 C17 C18 H18 120.6 . . ?
 Co1 C19 Co3 78.54(7) . . ?
 O4 C19 Co1 143.23(16) . . ?
 O4 C19 Co3 138.21(16) . . ?
 O5 C20 Co1 174.04(18) . . ?
 Co1 C21 Co2 78.70(7) . . ?
 O6 C21 Co1 143.13(16) . . ?
 O6 C21 Co2 138.13(16) . . ?
 O8 C22 Co2 178.37(18) . . ?
 O7 C23 Co3 179.42(19) . . ?
 Co2 C24 Co3 78.30(7) . . ?
 O9 C24 Co2 140.62(15) . . ?
 O9 C24 Co3 141.04(15) . . ?
 O10 C25 Co2 177.05(18) . . ?
 O11 C26 Co4 176.96(19) . . ?
 O12 C27 Co4 179.2(2) . . ?
 O13 C28 Co4 178.1(2) . . ?
 O14 C29 Co3 177.40(19) . . ?

loop_
  _geom_torsion_atom_site_label_1
  _geom_torsion_atom_site_label_2
  _geom_torsion_atom_site_label_3
  _geom_torsion_atom_site_label_4
  _geom_torsion
  _geom_torsion_site_symmetry_1
  _geom_torsion_site_symmetry_2
  _geom_torsion_site_symmetry_3
  _geom_torsion_site_symmetry_4
  _geom_torsion_publ_flag
 Co1 P1 O1 C1 -173.15(14) . . . . ?
 Co1 P1 O2 C7 -121.19(15) . . . . ?
 Co1 P1 O3 C13 -14.32(18) . . . . ?
 P1 O1 C1 C2 96.7(2) . . . . ?
 P1 O1 C1 C6 -87.6(2) . . . . ?
 P1 O2 C7 C8 -75.6(2) . . . . ?
 P1 O2 C7 C12 108.6(2) . . . . ?
 P1 O3 C13 C14 108.08(18) . . . . ?
 P1 O3 C13 C18 -74.4(2) . . . . ?
 O1 P1 O2 C7 120.33(16) . . . . ?
 O1 P1 O3 C13 109.85(15) . . . . ?
 O1 C1 C2 C3 174.7(2) . . . . ?
 O1 C1 C6 C5 -175.00(18) . . . . ?
 O2 P1 O1 C1 -48.75(17) . . . . ?
 O2 P1 O3 C13 -145.69(15) . . . . ?
 O2 C7 C8 C9 -175.54(19) . . . . ?
 O2 C7 C12 C11 175.8(3) . . . . ?
 O3 P1 O1 C1 53.86(17) . . . . ?
 O3 P1 O2 C7 13.84(17) . . . . ?
 O3 C13 C14 C15 178.79(16) . . . . ?
 O3 C13 C18 C17 -178.27(18) . . . . ?
 C1 C2 C3 C4 0.2(4) . . . . ?
 C2 C1 C6 C5 0.5(3) . . . . ?
 C2 C3 C4 C5 0.6(4) . . . . ?
 C3 C4 C5 C6 -0.9(4) . . . . ?
 C4 C5 C6 C1 0.3(3) . . . . ?
 C6 C1 C2 C3 -0.8(3) . . . . ?
 C7 C8 C9 C10 0.1(4) . . . . ?
 C8 C7 C12 C11 -0.1(4) . . . . ?
 C8 C9 C10 C11 -0.6(4) . . . . ?
 C9 C10 C11 C12 0.7(5) . . . . ?
 C10 C11 C12 C7 -0.4(5) . . . . ?
 C12 C7 C8 C9 0.2(3) . . . . ?
 C13 C14 C15 C16 -0.9(3) . . . . ?
 C14 C13 C18 C17 -0.9(3) . . . . ?
 C14 C15 C16 C17 0.0(3) . . . . ?
 C15 C16 C17 C18 0.4(3) . . . . ?
 C16 C17 C18 C13 0.0(3) . . . . ?
 C18 C13 C14 C15 1.3(3) . . . . ?

_shelx_res_file
;
TITL mo_b1959_0m_a.res in P2(1)/c
    mo_b1959_0m.res
    created by SHELXL-2018/3 at 06:45:48 on 14-Sep-2020
REM Old TITL mo_B1959_0m in P2(1)/c
REM SHELXT solution in P2(1)/c
REM R1 0.126, Rweak 0.008, Alpha 0.059, Orientation as input
REM Formula found by SHELXT: C29 O14 P Co4
CELL 0.71073 12.5987 8.9773 27.9534 90 96.829 90
ZERR 4 0.001 0.0009 0.0022 0 0.003 0
LATT 1
SYMM -X,0.5+Y,0.5-Z
SFAC C H Co O P
UNIT 116 60 16 56 4

L.S. 10
PLAN  5
SIZE 0.15 0.194 0.377
TEMP -173.15
CONF
BOND $H
list 4
MORE -1
fmap 2
acta
OMIT 0 1 2
OMIT -1 0 2
OMIT 1 1 0
REM <olex2.extras>
REM <HklSrc "%.\\mo_B1959_0m.hkl">
REM </olex2.extras>

WGHT    0.049000    4.462200
FVAR       0.27259
CO1   3    0.628723    0.235085    0.389849    11.00000    0.01388    0.01577 =
         0.01681    0.00288    0.00090    0.00250
CO2   3    0.548708    0.485533    0.381357    11.00000    0.01721    0.01600 =
         0.01539   -0.00028    0.00037    0.00212
CO3   3    0.531920    0.314575    0.312582    11.00000    0.01810    0.01522 =
         0.01486    0.00030    0.00104    0.00108
CO4   3    0.429545    0.261065    0.382508    11.00000    0.01529    0.01980 =
         0.01915    0.00304    0.00180    0.00091
P1    5    0.797145    0.258633    0.384690    11.00000    0.01477    0.01712 =
         0.01720    0.00182    0.00177    0.00255
O1    4    0.833912    0.423596    0.401531    11.00000    0.01748    0.01879 =
         0.02917   -0.00196    0.00512    0.00000
O2    4    0.834795    0.251380    0.331913    11.00000    0.02096    0.02560 =
         0.01772    0.00228    0.00391    0.00680
O3    4    0.886258    0.152824    0.412711    11.00000    0.01629    0.02615 =
         0.02213    0.00808    0.00228    0.00488
O4    4    0.603290    0.003908    0.315300    11.00000    0.04110    0.01937 =
         0.02969   -0.00190    0.00078    0.00702
O5    4    0.609330   -0.015314    0.454684    11.00000    0.02360    0.04939 =
         0.06512    0.03877    0.00326    0.00257
O6    4    0.663351    0.418859    0.476707    11.00000    0.02623    0.03671 =
         0.01661   -0.00177   -0.00154    0.00723
O7    4    0.685566    0.388693    0.245143    11.00000    0.02880    0.02770 =
         0.02594    0.00070    0.00751   -0.00175
O8    4    0.706397    0.717127    0.368040    11.00000    0.03094    0.02543 =
         0.03871    0.00272   -0.00759   -0.00636
O9    4    0.416483    0.597230    0.295830    11.00000    0.02954    0.02170 =
         0.02176    0.00234   -0.00107    0.00554
O10   4    0.405350    0.671771    0.430499    11.00000    0.03748    0.03490 =
         0.02445   -0.00190    0.00727    0.01510
O11   4    0.229155    0.392778    0.336031    11.00000    0.02144    0.03889 =
         0.03875   -0.00074   -0.00272    0.00592
O12   4    0.409945    0.287614    0.486791    11.00000    0.03327    0.03692 =
         0.02510    0.00150    0.00484   -0.00386
O13   4    0.372718   -0.056782    0.366232    11.00000    0.04773    0.02632 =
         0.04278    0.00308   -0.00065   -0.00479
O14   4    0.354936    0.213124    0.243379    11.00000    0.03050    0.02649 =
         0.02715   -0.00289   -0.00400   -0.00508
C1    1    0.935062    0.485965    0.398590    11.00000    0.01746    0.01812 =
         0.02754   -0.00348    0.00370    0.00042
C2    1    0.948809    0.575105    0.359572    11.00000    0.02871    0.02568 =
         0.03434    0.00446    0.00668   -0.00069
AFIX  43
H2    2    0.893028    0.587427    0.333862    11.00000   -1.20000
AFIX   0
C3    1    1.046835    0.646504    0.358966    11.00000    0.03619    0.02770 =
         0.05675    0.00323    0.01984   -0.00522
AFIX  43
H3    2    1.058106    0.708729    0.332548    11.00000   -1.20000
AFIX   0
C4    1    1.128051    0.627735    0.396476    11.00000    0.02464    0.02680 =
         0.06733   -0.01456    0.01339   -0.00658
AFIX  43
H4    2    1.194305    0.677768    0.395814    11.00000   -1.20000
AFIX   0
C5    1    1.112804    0.536277    0.434872    11.00000    0.02153    0.03308 =
         0.05026   -0.01743   -0.00193    0.00095
AFIX  43
H5    2    1.168957    0.522439    0.460327    11.00000   -1.20000
AFIX   0
C6    1    1.015040    0.464254    0.436291    11.00000    0.02346    0.02606 =
         0.02787   -0.00685   -0.00013    0.00258
AFIX  43
H6    2    1.003698    0.401639    0.462606    11.00000   -1.20000
AFIX   0
C7    1    0.906947    0.151728    0.314802    11.00000    0.01894    0.02282 =
         0.01776    0.00218    0.00431    0.00407
C8    1    1.015625    0.167781    0.328078    11.00000    0.01900    0.02516 =
         0.04135   -0.00384    0.00740   -0.00144
AFIX  43
H8    2    1.042165    0.241923    0.350642    11.00000   -1.20000
AFIX   0
C9    1    1.085497    0.072854    0.307652    11.00000    0.01981    0.03011 =
         0.04617    0.00151    0.01184    0.00159
AFIX  43
H9    2    1.160363    0.082398    0.316476    11.00000   -1.20000
AFIX   0
C10   1    1.047388   -0.034127    0.274972    11.00000    0.03383    0.04027 =
         0.02795   -0.00136    0.00768    0.01562
AFIX  43
H10   2    1.095509   -0.097728    0.260996    11.00000   -1.20000
AFIX   0
C11   1    0.938328   -0.048517    0.262571    11.00000    0.03964    0.06204 =
         0.04173   -0.03059   -0.00958    0.01867
AFIX  43
H11   2    0.911715   -0.123243    0.240235    11.00000   -1.20000
AFIX   0
C12   1    0.867011    0.045013    0.282373    11.00000    0.02665    0.05268 =
         0.03498   -0.02016   -0.00787    0.01113
AFIX  43
H12   2    0.792143    0.035190    0.273616    11.00000   -1.20000
AFIX   0
C13   1    0.868526    0.057359    0.450616    11.00000    0.01386    0.02013 =
         0.01908    0.00274   -0.00075    0.00274
C14   1    0.865443   -0.093790    0.441586    11.00000    0.02198    0.02158 =
         0.02470   -0.00305    0.00044    0.00220
AFIX  43
H14   2    0.873733   -0.130985    0.410431    11.00000   -1.20000
AFIX   0
C15   1    0.849976   -0.190586    0.478947    11.00000    0.02641    0.01848 =
         0.03736    0.00339    0.00120    0.00167
AFIX  43
H15   2    0.846625   -0.294888    0.473225    11.00000   -1.20000
AFIX   0
C16   1    0.839448   -0.136003    0.524352    11.00000    0.02210    0.02851 =
         0.02854    0.01012    0.00124    0.00141
AFIX  43
H16   2    0.828920   -0.202699    0.549749    11.00000   -1.20000
AFIX   0
C17   1    0.844264    0.016518    0.532859    11.00000    0.03416    0.03057 =
         0.01930    0.00131    0.00367   -0.00179
AFIX  43
H17   2    0.837519    0.053876    0.564151    11.00000   -1.20000
AFIX   0
C18   1    0.858897    0.114408    0.495782    11.00000    0.03188    0.02068 =
         0.02375   -0.00179    0.00536   -0.00102
AFIX  43
H18   2    0.862231    0.218779    0.501367    11.00000   -1.20000
AFIX   0
C19   1    0.595412    0.121114    0.331890    11.00000    0.02202    0.01782 =
         0.02246    0.00078    0.00240    0.00173
C20   1    0.622598    0.081597    0.430060    11.00000    0.01614    0.03023 =
         0.03427    0.01238    0.00090    0.00396
C21   1    0.631039    0.389071    0.437308    11.00000    0.01670    0.02490 =
         0.01757    0.00213    0.00234    0.00362
C22   1    0.646832    0.626610    0.373445    11.00000    0.02277    0.02117 =
         0.02190    0.00056   -0.00263    0.00242
C23   1    0.626713    0.360701    0.271250    11.00000    0.02157    0.01772 =
         0.02250    0.00081    0.00040    0.00056
C24   1    0.471253    0.512081    0.317853    11.00000    0.02068    0.01733 =
         0.01677    0.00015    0.00264   -0.00072
C25   1    0.461578    0.597761    0.412586    11.00000    0.02519    0.02623 =
         0.01755   -0.00034   -0.00108    0.00527
C26   1    0.305706    0.343842    0.355061    11.00000    0.02052    0.02380 =
         0.02475   -0.00043    0.00249   -0.00018
C27   1    0.417046    0.276472    0.446957    11.00000    0.01865    0.02766 =
         0.02657    0.00606    0.00337    0.00061
C28   1    0.395924    0.064383    0.372034    11.00000    0.02437    0.02758 =
         0.02671    0.00666    0.00265    0.00095
C29   1    0.425130    0.249995    0.269903    11.00000    0.02525    0.01788 =
         0.02061   -0.00111    0.00087    0.00085
HKLF 4


REM  mo_b1959_0m_a.res in P2(1)/c
REM wR2 = 0.100825, GooF = S = 1.03495, Restrained GooF = 1.03495 for all data
REM R1 = 0.036004 for 10539 Fo > 4sig(Fo) and 0.042105 for all 11959 data
REM 433 parameters refined using 0 restraints

END

WGHT      0.0490      4.4622

REM Highest difference peak  3.318,  deepest hole -0.670,  1-sigma level  0.103
Q1    1   0.4732  0.3755  0.4149  11.00000  0.05    3.32
Q2    1   0.5562  0.4350  0.3403  11.00000  0.05    3.29
Q3    1   0.4555  0.1962  0.3473  11.00000  0.05    3.21
Q4    1   0.3611  0.6031  0.2996  11.00000  0.05    0.57
Q5    1   0.9609  0.1715  0.3201  11.00000  0.05    0.56
;
_shelx_res_checksum                62567
_shelx_hkl_file
;
  -3   0   0 605.177 13.2920   4
   3   0   0 600.992 13.3531   3
  -3   0   0 607.222 13.2916   3
  -3   0   0 603.702 13.6858   7
   3   0   0 576.093 13.4871   7
  -3   0   0 583.032 14.1715   5
   3   0   0 589.131 14.0356   5
   3   0   0 603.668 13.2338   4
   3   0   0 593.461 13.7193   6
  -3   0   0 615.491 13.7982   6
   4   0   0 9999.99 261.077   2
   4   0   0 9981.44 260.451   1
  -4   0   0 9960.45 262.252   2
  -4   0   0 9973.88 261.753   1
  -5   0   0 2353.17 51.2584   6
  -5   0   0 2387.72 52.1509   5
   5   0   0 2332.66 51.6417   5
   5   0   0 2404.27 51.2103   6
  -5   0   0 2399.12 50.3789   3
   5   0   0 2354.72 50.4995   3
  -5   0   0 2392.20 50.4031   4
  -5   0   0 2436.76 51.2135   7
   5   0   0 2327.95 50.7880   7
   5   0   0 2359.03 50.2427   4
   6   0   0 165.327 5.08410   4
  -6   0   0 172.012 5.18456   3
  -6   0   0 176.505 5.30212   4
   6   0   0 162.123 5.77034   6
   6   0   0 164.099 5.28566   3
  -6   0   0 168.457 5.91885   7
  -6   0   0 159.078 5.84483   6
   6   0   0 147.064 8.29084   5
   6   0   0 172.546 5.57531   7
   7   0   0 362.571 10.2131   7
   7   0   0 380.776 11.2157   5
  -7   0   0 361.941 9.76014   4
  -7   0   0 380.340 9.78490   3
   7   0   0 365.721 9.61955   4
   7   0   0 356.767 10.5888   6
  -7   0   0 361.565 10.7190   7
   7   0   0 367.161 9.99213   3
  -7   0   0 363.790 11.6977   5
  -7   0   0 367.405 10.8403   6
  -8   0   0 60.3091 4.26757   5
  -8   0   0 57.9300 3.71455   7
   8   0   0 63.1861 3.05697   4
  -8   0   0 65.6237 3.20667   4
  -8   0   0 57.7651 3.65477   6
   8   0   0 66.0044 3.75662   6
   8   0   0 67.7438 3.51816   7
   8   0   0 59.6318 3.22530   3
   8   0   0 61.2689 3.87919   5
  -8   0   0 65.7006 3.15702   3
  -9   0   0 78.9100 3.67080   3
  -9   0   0 77.7668 5.15131   5
   9   0   0 73.0732 3.86693   3
  -9   0   0 76.2686 4.67801   7
  -9   0   0 74.9795 4.51203   6
   9   0   0 80.5675 4.46482   6
   9   0   0 83.4681 3.73671   4
   9   0   0 78.4882 4.63967   5
   9   0   0 71.8354 3.93744   7
  -9   0   0 72.5651 3.63035   4
 -10   0   0 423.022 14.6075   5
 -10   0   0 417.200 11.8500   4
  10   0   0 404.440 12.1392   3
 -10   0   0 404.793 13.2865   7
 -10   0   0 420.891 13.3454   6
 -10   0   0 430.079 11.6039   3
  10   0   0 390.676 13.1878   5
  10   0   0 418.097 11.4995   4
  10   0   0 427.896 13.0914   6
 -11   0   0 282.674 11.8181   5
  11   0   0 278.060 10.2984   6
 -11   0   0 276.578 10.7219   7
  11   0   0 282.972 10.6567   5
 -11   0   0 284.118 8.81992   3
 -11   0   0 277.567 10.6607   6
 -11   0   0 285.754 9.11404   4
 -12   0   0 834.229 20.7917   3
 -12   0   0 831.860 24.9039   5
  12   0   0 836.628 22.6861   6
 -12   0   0 811.681 23.3336   7
  12   0   0 766.380 21.3949   3
 -12   0   0 813.105 20.7603   4
 -13   0   0 205.244 7.58005   3
 -13   0   0 206.997 10.6862   5
 -13   0   0 189.534 9.46944   7
 -13   0   0 206.126 7.69351   4
  13   0   0 213.206 9.26034   6
 -14   0   0 12.2931 2.78230   7
 -14   0   0 13.9703 2.13121   4
 -14   0   0 9.41548 3.08052   5
 -14   0   0 13.2120 1.98930   3
  14   0   0 14.4204 2.98418   6
 -15   0   0 7.70088 1.81271   4
 -15   0   0 6.28344 2.24087   7
 -15   0   0 9.35230 1.72311   3
 -15   0   0 7.27018 2.80023   5
 -16   0   0 19.6523 3.83239   7
 -16   0   0 26.0341 2.98866   3
 -16   0   0 19.0359 2.73423   4
 -16   0   0 25.6044 4.87188   5
  16   0   0 23.9384 3.85149   6
 -17   0   0 1.76866 2.50631   5
  17   0   0 1.09376 1.75761   6
 -17   0   0 6.18732 2.51408   7
 -18   0   0 40.1548 6.09522   7
  18   0   0 45.7765 5.07271   6
 -19   0   0 109.164 9.11803   7
  19   0   0 118.554 8.54633   6
   0  -1   0 -0.0081 0.05987   3
   0  -1   0 0.09451 0.11496   7
   0  -1   0 0.60678 0.25522   3
   0  -1   0 -0.0149 0.05915   4
   0   1   0 0.10504 0.18682   7
   0   1   0 0.01098 0.06206   3
   0   1   0 0.46288 0.23269   4
  -1   1   0 377.940 8.51674   6
  -2  -1   0 76.7185 2.70202   4
   2  -1   0 80.5429 2.77240   7
   2  -1   0 75.9013 2.41168   3
  -2  -1   0 76.5144 2.46883   3
   2  -1   0 77.0603 2.50079   6
   2   1   0 74.5721 2.49695   3
   2   1   0 77.6421 2.69020   4
   2   1   0 78.9567 2.74021   6
   2   1   0 77.8515 2.66622   5
  -2   1   0 73.6172 2.40948   3
  -2   1   0 79.5529 2.49650   6
  -3  -1   0 349.837 8.57069   4
   3  -1   0 324.935 8.27729   6
   3  -1   0 326.275 8.01847   3
   3  -1   0 348.648 9.01723   5
   3  -1   0 328.227 8.52689   7
  -3  -1   0 331.468 8.62833   5
  -3  -1   0 342.570 8.14902   3
  -3   1   0 327.781 8.97961   5
   3   1   0 320.853 8.52514   6
  -3   1   0 335.457 7.37065   4
  -3   1   0 339.911 8.78611   7
  -3   1   0 331.462 8.06624   3
   3   1   0 330.497 8.57154   5
  -3   1   0 332.262 8.29443   6
   3   1   0 350.414 8.28928   3
   3   1   0 339.527 8.47902   4
  -4  -1   0 56.3214 2.76311   6
  -4  -1   0 57.9314 2.85865   5
   4  -1   0 62.3732 2.72328   7
  -4  -1   0 59.4256 2.45063   7
   4  -1   0 57.0922 2.29853   3
  -4  -1   0 56.8964 2.62886   4
   4  -1   0 57.3855 2.98527   5
   4  -1   0 59.9197 2.62308   6
  -4  -1   0 55.8141 2.33297   3
   4   1   0 58.7105 2.60442   4
  -4   1   0 58.9147 2.60154   6
  -4   1   0 56.8234 2.32485   3
  -4   1   0 60.1496 1.84451   4
  -4   1   0 56.2598 2.82384   7
   4   1   0 56.7148 2.73498   5
  -4   1   0 61.1569 3.17469   5
   4   1   0 55.3550 2.45763   3
   5  -1   0 995.159 23.7102   5
  -5  -1   0 1000.05 22.2797   3
   5  -1   0 992.150 22.8786   6
   5  -1   0 1005.88 22.9394   7
  -5  -1   0 1027.66 22.6098   7
  -5  -1   0 1015.58 22.8906   4
   5  -1   0 982.257 22.2019   3
  -5  -1   0 998.309 23.5971   5
  -5  -1   0 969.942 23.2233   6
   5   1   0 1004.39 23.1273   6
   5   1   0 957.001 22.6373   4
  -5   1   0 1025.75 21.4933   4
   5   1   0 1038.18 22.6786   3
  -5   1   0 989.641 22.8531   6
  -5   1   0 986.061 22.1941   3
   5   1   0 977.174 23.1977   5
  -5   1   0 961.780 23.3204   7
  -5   1   0 995.865 24.0933   5
  -6  -1   0 332.956 9.91528   6
  -6  -1   0 336.563 8.88785   3
   6  -1   0 332.506 9.51655   6
   6  -1   0 334.989 11.4888   5
   6  -1   0 338.784 8.89871   3
  -6  -1   0 334.475 9.28569   7
  -6  -1   0 314.434 10.1154   5
  -6  -1   0 337.338 9.40150   4
  -6   1   0 342.919 8.19800   4
  -6   1   0 321.451 10.5476   5
   6   1   0 357.746 9.34418   4
   6   1   0 330.926 9.85221   5
  -6   1   0 330.617 8.78859   3
   6   1   0 335.204 9.22954   3
  -6   1   0 334.623 9.55248   6
  -6   1   0 320.988 9.92081   7
   7  -1   0 25.9208 2.25254   6
  -7  -1   0 24.9649 2.07457   4
   7  -1   0 25.8572 2.12878   7
  -7  -1   0 26.7326 1.98005   3
   7  -1   0 25.2496 1.90804   3
   7  -1   0 26.3631 2.49031   5
  -7  -1   0 29.1402 2.26579   7
  -7  -1   0 24.1908 2.30415   6
  -7   1   0 29.7348 2.59825   7
   7   1   0 28.1431 2.11927   4
   7   1   0 28.8579 2.44086   5
  -7   1   0 26.3804 1.60619   4
   7   1   0 28.8898 2.16237   3
  -7   1   0 26.3075 1.92778   3
  -7   1   0 26.2075 2.24904   6
   7   1   0 26.8802 2.35459   6
  -7   1   0 22.8522 2.56615   5
   8  -1   0 1122.21 27.2251   6
   8  -1   0 1161.83 26.9457   7
   8  -1   0 1131.58 26.2816   3
   8  -1   0 1149.62 28.1776   5
  -8  -1   0 1133.03 27.0844   7
  -8  -1   0 1141.79 26.0559   3
  -8  -1   0 1124.50 28.5785   5
  -8  -1   0 1086.20 27.6721   6
   8   1   0 1139.85 27.7042   5
   8   1   0 1139.58 27.4787   6
  -8   1   0 1172.48 26.1104   3
  -8   1   0 1148.16 27.3833   6
   8   1   0 1100.15 26.6588   3
  -8   1   0 1135.00 29.1041   5
  -8   1   0 1117.03 28.0003   7
  -8   1   0 1117.92 25.2930   4
   8   1   0 1195.79 26.6352   4
   9  -1   0 1191.98 28.9020   5
  -9  -1   0 1141.25 29.4444   5
   9  -1   0 1114.50 26.7296   3
  -9  -1   0 1149.69 27.3283   4
  -9  -1   0 1177.29 26.4453   3
   9  -1   0 1133.14 27.4182   7
   9  -1   0 1155.70 27.8860   6
  -9  -1   0 1102.92 28.3677   6
  -9  -1   0 1143.20 27.8144   7
   9   1   0 1107.43 28.1297   5
   9   1   0 1122.45 27.2192   3
  -9   1   0 1120.20 27.9115   6
  -9   1   0 1157.16 25.7356   4
  -9   1   0 1178.58 28.9348   7
   9   1   0 1128.77 26.8798   4
  -9   1   0 1099.95 29.6775   5
   9   1   0 1120.85 27.9619   6
  -9   1   0 1162.63 26.4148   3
  10  -1   0 1546.29 37.1728   6
  10  -1   0 1598.95 38.2261   5
 -10  -1   0 1628.96 37.4640   7
  10  -1   0 1489.85 35.9446   3
  10  -1   0 1527.15 36.5881   7
 -10  -1   0 1558.34 38.0495   6
 -10  -1   0 1533.37 36.4600   4
 -10  -1   0 1583.86 39.1611   5
 -10  -1   0 1602.11 35.5145   3
  10   1   0 1552.75 37.3530   6
 -10   1   0 1599.75 37.6046   6
  10   1   0 1584.08 36.0875   4
  10   1   0 1534.15 36.5763   3
 -10   1   0 1601.50 35.5543   3
 -10   1   0 1563.94 34.7910   4
 -10   1   0 1563.61 39.5672   5
  10   1   0 1561.52 37.6852   5
 -10   1   0 1595.08 38.5025   7
 -11  -1   0 1321.29 34.4105   5
 -11  -1   0 1250.30 32.9125   6
  11  -1   0 1247.41 32.7300   3
  11  -1   0 1254.29 31.4564   7
 -11  -1   0 1332.51 32.5650   7
  11  -1   0 1319.87 32.2715   6
 -11  -1   0 1288.06 31.3641   4
  11  -1   0 1266.44 32.9546   5
 -11  -1   0 1332.98 30.2840   3
  11   1   0 1301.22 32.4037   6
  11   1   0 1287.84 32.6142   5
 -11   1   0 1318.62 34.8582   5
  11   1   0 1263.08 31.4774   3
  11   1   0 1336.91 31.0267   4
 -11   1   0 1290.74 29.5205   4
 -11   1   0 1340.37 30.3257   3
 -11   1   0 1291.92 32.5436   6
 -11   1   0 1350.38 33.8509   7
  12  -1   0 82.4778 4.72580   3
  12  -1   0 81.7684 4.94988   7
 -12  -1   0 85.3051 4.29411   3
 -12  -1   0 88.7045 6.45693   5
 -12  -1   0 89.5648 5.60311   7
 -12  -1   0 88.8532 4.95105   4
  12  -1   0 85.7431 5.43017   6
 -12   1   0 82.6487 3.90007   4
 -12   1   0 84.8581 4.26149   3
  12   1   0 79.6287 5.29451   3
  12   1   0 78.3623 5.27830   6
 -12   1   0 92.0329 6.68793   5
 -12   1   0 83.3390 5.42833   6
 -12   1   0 82.8913 5.95266   7
 -13  -1   0 7.17284 2.38050   7
  13  -1   0 6.90721 2.14033   6
 -13  -1   0 4.93217 1.66824   4
 -13  -1   0 5.35049 1.51384   3
 -13  -1   0 9.51110 2.68011   5
 -13   1   0 8.76717 2.57826   7
  13   1   0 8.27167 2.49383   6
 -13   1   0 6.08515 2.42641   5
 -13   1   0 6.53019 1.28229   4
 -14  -1   0 2.21775 1.40565   7
  14  -1   0 -0.0075 1.37765   6
 -14  -1   0 1.51179 1.78737   5
 -14  -1   0 0.53933 0.87633   3
 -14   1   0 0.91903 0.82435   4
 -14   1   0 0.73149 1.68237   5
 -14   1   0 2.79415 2.08593   7
  14   1   0 1.03979 1.46661   6
 -15  -1   0 156.708 8.87195   7
 -15  -1   0 151.788 6.10446   3
 -15  -1   0 131.838 7.99457   4
  15  -1   0 156.013 9.61048   6
 -15  -1   0 173.410 10.2679   5
  15   1   0 155.942 8.51631   6
 -15   1   0 141.903 9.06926   7
 -16  -1   0 45.9050 6.51624   7
  16  -1   0 63.2709 5.52262   6
 -16  -1   0 55.4265 4.75196   4
 -16  -1   0 57.0718 3.53937   3
 -16  -1   0 64.2550 6.58775   5
  16   1   0 58.8110 5.48811   6
 -16   1   0 55.1324 3.18968   4
 -16   1   0 62.6779 6.21284   7
 -16   1   0 60.8198 3.15881   3
 -17  -1   0 11.8719 4.19389   5
  17  -1   0 5.84862 2.24994   6
 -17  -1   0 14.1945 3.38091   7
  17   1   0 6.28226 2.63076   6
 -17   1   0 11.1463 3.30956   7
 -18  -1   0 2.78625 2.52566   5
  18  -1   0 4.76920 2.31520   6
 -18  -1   0 2.78993 2.59368   7
  18   1   0 6.30123 2.37124   6
 -18   1   0 2.17413 2.90378   7
 -19  -1   0 26.5479 5.06288   5
 -19  -1   0 21.2338 4.94760   7
  19  -1   0 20.7629 6.60360   6
 -19   1   0 25.3210 5.26007   7
  19   1   0 28.2436 4.47175   6
   0  -2   0 501.090 11.9849   3
   0  -2   0 505.075 11.8468   3
   0  -2   0 500.339 11.9340   7
   0  -2   0 514.796 11.7913   4
   0   2   0 499.763 11.9087   3
   0   2   0 500.925 11.9695   7
   0   2   0 505.381 11.7771   4
   1  -2   0 2400.13 49.3045   4
  -1  -2   0 2370.50 49.6863   7
  -1  -2   0 2315.03 49.8219   3
  -1  -2   0 2317.85 49.8978   4
   1  -2   0 2347.88 49.6608   3
  -1   2   0 2321.24 49.6967   3
  -1   2   0 2357.55 50.1493   7
   1   2   0 2327.47 49.9096   4
   1   2   0 2383.38 49.9226   3
   2  -2   0 408.359 9.11929   4
   2  -2   0 406.954 9.83125   3
  -2  -2   0 394.304 9.93130   3
   2  -2   0 409.231 10.3175   7
  -2  -2   0 394.139 10.2253   4
   2   2   0 401.723 10.2101   4
  -2   2   0 396.484 9.70166   6
  -2   2   0 397.163 9.14101   4
   2   2   0 400.394 10.0731   3
  -2   2   0 406.860 9.88718   3
  -2   2   0 410.272 10.5365   7
   3  -2   0 16.1666 1.29449   6
   3  -2   0 14.8233 1.19969   3
  -3  -2   0 15.9132 1.35963   5
  -3  -2   0 15.0154 1.26480   3
  -3  -2   0 13.2883 1.34262   4
   3  -2   0 13.5142 1.36327   7
  -3   2   0 13.8413 1.19435   3
   3   2   0 13.9803 1.35810   4
   3   2   0 13.5621 1.24119   3
  -3   2   0 15.2261 1.19024   6
  -3   2   0 13.8450 0.76358   4
   3   2   0 15.2321 1.43686   6
   4  -2   0 55.5009 2.47138   3
  -4  -2   0 50.4841 2.78860   4
  -4  -2   0 52.9323 2.47718   3
   4  -2   0 53.8561 2.83089   7
   4  -2   0 52.0197 2.57776   6
  -4  -2   0 53.6958 2.78837   5
   4  -2   0 58.9182 3.19841   5
  -4   2   0 55.2615 2.53445   3
   4   2   0 51.6365 2.60363   3
   4   2   0 52.0511 2.78668   5
  -4   2   0 56.7347 3.13407   7
  -4   2   0 50.5287 2.46712   6
   4   2   0 52.5531 2.85696   6
   4   2   0 53.1761 2.81535   4
  -5  -2   0 799.362 19.3996   5
   5  -2   0 726.225 19.7130   7
  -5  -2   0 800.462 19.2958   4
  -5  -2   0 790.384 18.3861   3
   5  -2   0 774.631 18.7245   6
   5  -2   0 802.732 18.3534   3
   5  -2   0 796.401 19.8961   5
  -5   2   0 792.742 18.3939   3
   5   2   0 782.386 18.7794   3
  -5   2   0 765.457 19.7380   7
   5   2   0 805.522 19.1457   4
   5   2   0 815.773 19.3456   5
  -5   2   0 801.613 18.7115   6
  -6  -2   0 0.51814 0.59603   3
   6  -2   0 1.12943 0.75832   7
   6  -2   0 0.67902 0.83905   5
  -6  -2   0 1.85890 0.91800   4
  -6  -2   0 0.46366 0.48316   7
   6  -2   0 -0.4855 0.48199   6
  -6  -2   0 1.54633 0.76716   5
   6   2   0 0.42602 0.68419   4
  -6   2   0 1.98095 0.73443   3
   6   2   0 0.41139 0.61399   3
  -6   2   0 0.50252 0.66215   7
   6   2   0 0.50411 0.62434   6
  -6   2   0 0.56819 0.55006   6
   6   2   0 0.52892 0.55817   5
   7  -2   0 6.24613 1.13831   3
  -7  -2   0 9.45878 1.42513   3
   7  -2   0 6.00429 1.19818   6
  -7  -2   0 8.09578 1.43762   4
   7  -2   0 5.98361 1.13642   7
  -7  -2   0 7.93796 1.40576   7
  -7  -2   0 5.43344 1.45860   5
   7  -2   0 11.8659 2.20745   5
   7   2   0 6.75404 1.44863   6
   7   2   0 6.91475 1.39537   3
   7   2   0 7.69313 1.65830   5
  -7   2   0 7.78830 1.54138   6
  -7   2   0 5.77079 1.14062   3
  -7   2   0 3.99763 1.15873   7
  -7   2   0 7.87892 0.70019   4
   7   2   0 10.5429 1.81180   4
  -8  -2   0 9.05684 1.53200   7
   8  -2   0 8.92232 1.77296   6
  -8  -2   0 8.16754 1.97501   5
  -8  -2   0 8.69514 1.74110   4
  -8  -2   0 8.16124 1.40602   3
   8  -2   0 8.24993 1.66526   5
   8  -2   0 6.91654 1.32572   3
   8  -2   0 5.24951 1.16381   7
  -8   2   0 9.69628 0.83999   4
   8   2   0 9.23620 1.78315   5
  -8   2   0 6.92043 1.49401   7
   8   2   0 6.54433 1.50708   4
   8   2   0 9.06268 1.67131   3
  -8   2   0 10.2855 1.87407   6
  -8   2   0 8.21742 1.37345   3
   8   2   0 10.1698 1.66339   6
  -9  -2   0 3.38476 1.46272   5
  -9  -2   0 0.23709 0.77353   7
   9  -2   0 0.81207 0.72974   7
   9  -2   0 3.56080 1.32850   5
  -9  -2   0 -0.1821 0.64753   4
   9  -2   0 0.62879 0.81666   6
  -9  -2   0 -0.0771 0.71898   3
   9  -2   0 0.43628 0.72272   3
  -9   2   0 0.65480 0.62412   6
   9   2   0 0.55832 0.92237   4
  -9   2   0 1.47753 0.46535   4
   9   2   0 1.41144 0.96700   3
   9   2   0 -0.4222 0.63038   5
   9   2   0 7.39769 1.84670   6
  -9   2   0 1.55108 1.19845   7
  -9   2   0 1.36243 0.86873   3
 -10  -2   0 150.575 6.62433   7
 -10  -2   0 150.588 6.70398   4
  10  -2   0 150.577 6.77199   6
  10  -2   0 142.264 5.92365   3
 -10  -2   0 146.910 5.70943   3
 -10  -2   0 143.265 7.51865   5
  10  -2   0 152.060 7.47567   7
  10   2   0 143.408 6.87311   6
  10   2   0 155.878 6.74259   3
 -10   2   0 145.102 6.63173   6
 -10   2   0 148.238 4.38861   4
  10   2   0 141.927 6.98455   5
 -10   2   0 151.626 7.73938   7
  10   2   0 135.865 7.29961   4
 -10   2   0 156.071 5.85025   3
 -11  -2   0 33.0282 3.84240   5
  11  -2   0 29.4565 2.97257   7
  11  -2   0 33.9775 3.46565   5
  11  -2   0 24.0041 2.59961   3
 -11  -2   0 30.8871 3.05160   4
 -11  -2   0 27.6591 2.99980   7
 -11  -2   0 29.0507 2.60384   3
  11  -2   0 35.6248 3.47463   6
 -11   2   0 31.6004 3.80782   7
  11   2   0 26.9537 3.07740   5
 -11   2   0 31.1349 3.15026   6
  11   2   0 33.9301 3.44468   6
  11   2   0 31.5833 3.06794   4
 -11   2   0 34.9218 2.76002   3
  11   2   0 35.2627 3.24602   3
 -11   2   0 32.1135 1.75425   4
 -12  -2   0 3.16292 1.43379   4
 -12  -2   0 1.59414 1.00983   3
 -12  -2   0 1.09748 1.23406   7
  12  -2   0 1.14071 1.18997   6
 -12  -2   0 -0.7302 1.27264   5
  12   2   0 -0.4862 0.85840   4
 -12   2   0 0.97822 1.31039   7
 -12   2   0 0.66375 0.51668   4
 -12   2   0 1.97375 1.07655   3
 -12   2   0 1.13821 1.02834   6
  12   2   0 0.21811 0.92656   6
 -13  -2   0 194.219 10.2086   5
 -13  -2   0 190.670 8.73601   7
 -13  -2   0 174.978 6.89832   3
  13  -2   0 191.301 8.74976   6
  13   2   0 181.321 8.80386   6
  13   2   0 189.325 8.08333   4
 -13   2   0 183.099 9.84263   7
 -14  -2   0 231.950 8.06974   3
 -14  -2   0 212.169 9.45299   4
  14  -2   0 227.039 10.1469   6
 -14  -2   0 225.196 10.1657   7
 -14  -2   0 227.105 11.6919   5
  14   2   0 229.190 9.25153   4
  14   2   0 227.371 10.2795   6
 -14   2   0 232.308 11.7453   7
  15  -2   0 154.001 9.42640   6
 -15  -2   0 169.162 8.96360   7
 -15  -2   0 165.485 6.54179   3
 -15  -2   0 170.229 10.2897   5
  15   2   0 161.189 8.83629   6
 -15   2   0 166.358 6.65139   3
 -15   2   0 154.470 9.85486   7
 -16  -2   0 0.45743 1.92636   5
 -16  -2   0 2.08186 1.87344   7
 -16  -2   0 5.74433 1.51045   3
  16  -2   0 9.55316 2.53235   6
  16   2   0 5.35617 2.47475   6
 -16   2   0 8.25101 3.07549   7
 -17  -2   0 -1.5396 1.54782   7
 -17  -2   0 4.27319 2.34948   5
 -17   2   0 1.14260 2.04941   7
  17   2   0 4.21813 2.07224   6
 -18  -2   0 170.586 10.2506   7
 -18  -2   0 176.732 11.7471   5
  18  -2   0 178.760 10.1083   6
  18   2   0 174.379 10.1389   6
 -18   2   0 178.558 11.9383   7
 -19  -2   0 270.812 13.7104   7
 -19  -2   0 259.920 14.8412   5
  19   2   0 268.664 12.9595   6
 -19   2   0 232.616 15.5029   7
   0  -3   0 1.90410 0.67980   7
   0  -3   0 0.69984 0.46308   3
   0  -3   0 -0.2988 0.31399   4
   0  -3   0 0.65323 0.47953   3
   0   3   0 -0.2450 0.29798   4
   0   3   0 0.66592 0.57853   7
   1  -3   0 445.280 12.0263   7
  -1  -3   0 468.340 11.8610   7
   1  -3   0 462.132 11.7974   3
  -1  -3   0 474.151 12.0477   4
   1  -3   0 475.315 11.4910   4
  -1  -3   0 476.667 12.0962   3
  -1   3   0 492.350 11.5614   4
  -1   3   0 465.443 12.2963   7
  -2  -3   0 1476.23 33.0717   3
   2  -3   0 1478.55 33.4048   7
   2  -3   0 1498.62 32.0969   4
   2  -3   0 1499.59 32.8527   3
  -2  -3   0 1495.04 33.3753   4
  -2   3   0 1479.57 32.9186   3
   2   3   0 1463.95 33.2690   4
  -2   3   0 1492.68 33.7789   7
  -2   3   0 1532.84 32.1759   4
   2   3   0 1463.06 33.1870   3
  -3  -3   0 1887.63 42.9944   4
   3  -3   0 1972.54 43.1457   7
  -3  -3   0 1999.48 42.5703   3
   3  -3   0 2005.53 41.1169   4
   3  -3   0 1934.48 42.2581   3
  -3   3   0 1888.80 43.4499   7
  -3   3   0 1953.96 42.3918   3
   3   3   0 1910.85 42.7466   3
  -3   3   0 1962.71 41.1870   4
   3   3   0 1980.72 43.0934   4
  -3   3   0 1896.40 42.0434   6
  -4  -3   0 358.069 9.96896   5
   4  -3   0 345.518 9.41528   3
   4  -3   0 352.949 11.9260   7
  -4  -3   0 351.586 9.55399   3
   4   3   0 347.432 10.2838   6
  -4   3   0 346.440 9.31152   6
  -4   3   0 351.052 9.55732   3
   4   3   0 326.339 10.4555   3
  -4   3   0 344.990 8.08542   4
  -4   3   0 338.306 10.5787   7
   4   3   0 332.742 10.0243   4
  -5  -3   0 107.133 4.76116   5
   5  -3   0 108.762 4.85836   7
  -5  -3   0 114.119 5.04683   4
   5  -3   0 117.404 4.42763   3
  -5  -3   0 109.591 4.38804   3
   5  -3   0 106.580 5.15177   5
   5  -3   0 122.825 4.77909   6
   5   3   0 117.709 5.02415   4
  -5   3   0 111.817 5.39936   7
  -5   3   0 115.926 4.51828   3
   5   3   0 112.089 4.75707   3
  -5   3   0 113.674 4.41304   6
  -6  -3   0 1813.05 41.6336   4
   6  -3   0 1792.45 40.7565   6
   6  -3   0 1828.78 42.2880   5
   6  -3   0 1794.80 40.1737   3
   6  -3   0 1852.00 41.4595   7
  -6  -3   0 1838.93 41.4754   5
  -6  -3   0 1812.25 40.2405   3
  -6   3   0 1862.87 40.4300   3
  -6   3   0 1816.83 42.4846   7
   6   3   0 1798.93 41.0590   3
   6   3   0 1817.95 41.5350   6
  -6   3   0 1832.45 40.5240   6
   6   3   0 1803.79 41.3772   4
   7  -3   0 3.91525 1.18624   7
  -7  -3   0 9.13459 1.84705   4
   7  -3   0 6.24862 1.57339   5
  -7  -3   0 7.58448 1.28107   7
   7  -3   0 10.1953 1.77127   6
   7  -3   0 6.96844 1.29527   3
  -7  -3   0 6.38347 1.28098   3
  -7   3   0 7.59906 1.37603   3
  -7   3   0 6.47570 2.43818   7
   7   3   0 5.79314 1.35555   3
   7   3   0 9.36083 1.81604   4
  -7   3   0 9.63043 1.47883   6
   7   3   0 7.36209 1.55053   6
   8  -3   0 430.991 12.9147   6
  -8  -3   0 452.538 12.1114   3
   8  -3   0 435.760 12.1538   3
   8  -3   0 447.109 13.2065   7
  -8  -3   0 458.655 12.2935   7
   8  -3   0 439.779 14.1275   5
  -8  -3   0 424.159 13.6000   5
  -8  -3   0 428.839 13.4207   4
   8   3   0 429.301 13.4862   5
   8   3   0 426.549 12.9670   3
  -8   3   0 432.989 14.3941   7
  -8   3   0 455.234 12.2820   3
   8   3   0 449.103 13.5715   6
  -8   3   0 439.920 12.7182   6
   9  -3   0 267.341 8.76731   3
  -9  -3   0 267.941 9.97915   4
  -9  -3   0 278.443 10.5536   5
   9  -3   0 284.347 9.82923   7
  -9  -3   0 285.947 9.04171   7
   9  -3   0 286.057 10.7807   5
   9  -3   0 286.623 9.75823   6
   9   3   0 270.513 9.68107   3
  -9   3   0 264.078 10.8949   7
   9   3   0 269.910 9.98762   6
   9   3   0 261.958 10.0057   5
  -9   3   0 285.289 9.56918   6
   9   3   0 272.316 9.70088   4
  -9   3   0 272.583 8.74868   3
 -10  -3   0 950.729 22.7305   3
  10  -3   0 903.621 24.0917   7
 -10  -3   0 913.498 24.6580   4
  10  -3   0 959.239 25.7696   5
 -10  -3   0 936.427 25.6585   5
  10  -3   0 935.415 24.2735   6
 -10  -3   0 893.014 24.8449   7
  10  -3   0 880.450 24.5701   3
 -10   3   0 930.772 24.0507   6
  10   3   0 927.352 24.9020   5
 -10   3   0 944.717 26.4279   7
 -10   3   0 942.086 22.8233   3
  10   3   0 984.819 24.4262   4
  10   3   0 853.922 24.0110   3
  10   3   0 943.367 24.8840   6
 -11  -3   0 540.646 17.6914   5
  11  -3   0 519.772 16.1570   6
 -11  -3   0 519.749 15.3992   7
  11  -3   0 510.811 14.9711   3
 -11  -3   0 541.160 14.6085   3
 -11   3   0 548.235 14.7201   3
  11   3   0 549.359 16.8221   6
  11   3   0 532.386 15.9747   4
 -11   3   0 522.325 18.0579   7
 -11   3   0 522.535 16.0201   6
  11   3   0 507.958 16.9209   3
 -12  -3   0 72.9265 5.13641   4
 -12  -3   0 66.1278 4.56605   7
 -12  -3   0 70.0152 5.70452   5
 -12  -3   0 71.9342 4.10570   3
  12  -3   0 72.4907 5.13388   6
 -12   3   0 66.0071 5.84583   7
  12   3   0 75.2181 5.38417   6
  12   3   0 62.9212 4.62903   4
 -13  -3   0 -1.0432 1.20177   5
 -13  -3   0 -0.6135 1.02931   7
  13  -3   0 -0.4408 1.09214   6
 -13  -3   0 0.20757 0.95402   3
 -13  -3   0 0.83574 1.39494   4
  13   3   0 2.04890 1.33923   4
 -13   3   0 -0.3134 0.88751   3
  13   3   0 0.98189 1.55253   6
 -13   3   0 1.92622 1.76256   7
 -14  -3   0 15.6974 2.29131   3
 -14  -3   0 12.3265 2.59262   7
  14  -3   0 13.2713 2.78431   6
 -14   3   0 16.8384 2.84173   3
  14   3   0 15.2664 2.89920   4
 -14   3   0 9.09247 2.76321   7
  14   3   0 12.0145 2.85626   6
 -15  -3   0 1.05150 1.49937   7
 -15  -3   0 1.79251 1.25546   3
 -15  -3   0 -0.2418 1.49173   5
 -15   3   0 -0.7644 1.44881   7
  15   3   0 1.47810 1.93651   6
 -15   3   0 1.06702 1.12584   3
  15   3   0 0.84472 1.50969   4
  16  -3   0 40.7716 4.67193   6
 -16  -3   0 46.1794 4.88708   7
 -16  -3   0 38.0636 3.21306   3
 -16  -3   0 34.9215 5.94155   5
  16   3   0 42.8959 4.90134   6
 -16   3   0 30.7826 5.01035   7
 -17  -3   0 0.54624 1.27153   3
  17  -3   0 0.24135 1.67776   6
 -17  -3   0 1.70927 2.19185   5
 -17  -3   0 -1.0666 1.51057   7
 -17   3   0 -0.8905 2.35023   7
  17   3   0 0.28555 1.68587   6
 -18  -3   0 2.23072 2.94156   5
  18  -3   0 0.71435 1.69766   6
 -18  -3   0 0.25037 2.02728   7
  18   3   0 3.16078 3.53262   6
 -18   3   0 1.67539 2.60229   7
   0  -4   0 2830.26 61.2599   3
   0  -4   0 2884.00 60.7857   4
   0  -4   0 2771.48 60.7924   3
   0  -4   0 2841.00 61.0849   7
   0   4   0 2797.58 61.1133   7
   0   4   0 2776.98 60.6813   4
   1  -4   0 2594.75 57.5269   7
  -1  -4   0 2604.28 57.2382   7
   1  -4   0 2626.70 57.6697   3
   1  -4   0 2703.08 57.7060   3
   1  -4   0 2703.71 56.7998   4
  -1  -4   0 2644.39 57.4373   4
  -1  -4   0 2567.25 57.3923   3
  -1  -4   0 2606.89 57.5305   3
   1   4   0 2704.70 57.4662   4
  -1   4   0 2639.25 56.7666   4
   1   4   0 2648.26 57.8133   3
  -1   4   0 2625.54 57.8484   7
   2  -4   0 650.480 18.5945   3
   2  -4   0 740.062 16.9735   4
  -2  -4   0 739.284 18.0705   3
  -2  -4   0 726.357 17.7012   7
  -2  -4   0 721.177 19.4437   4
   2  -4   0 706.117 18.3245   7
  -2   4   0 707.970 16.9507   4
   2   4   0 695.337 18.0069   4
  -2   4   0 760.525 18.7845   7
   2   4   0 706.173 18.0739   3
   3  -4   0 99.6791 4.26837   3
   3  -4   0 98.5960 4.65498   7
  -3  -4   0 97.8239 4.69136   4
  -3  -4   0 97.0118 4.42159   3
   3  -4   0 102.351 3.62513   4
   3   4   0 96.9717 4.62619   4
  -3   4   0 102.223 5.06602   7
  -3   4   0 102.196 4.17871   6
   3   4   0 99.3282 4.60520   3
  -3   4   0 102.321 4.41826   3
  -3   4   0 95.0158 3.60560   4
  -4  -4   0 24.1585 2.15988   3
   4  -4   0 21.2150 2.17224   7
   4  -4   0 21.5399 1.88621   3
  -4  -4   0 21.9735 2.15270   5
  -4   4   0 21.1921 1.43546   4
  -4   4   0 27.4204 2.65354   7
  -4   4   0 19.2301 1.97213   3
   4   4   0 17.4695 1.97790   3
  -4   4   0 19.3175 1.79871   6
   4   4   0 18.0894 2.11676   4
   5  -4   0 1421.09 32.4783   3
  -5  -4   0 1461.56 33.2979   5
  -5  -4   0 1419.08 33.8220   4
   5  -4   0 1405.28 33.5494   7
  -5  -4   0 1464.49 32.7398   3
   5   4   0 1374.90 33.2694   3
  -5   4   0 1414.59 32.6048   3
  -5   4   0 1471.78 30.5276   4
  -5   4   0 1442.07 34.6486   7
  -5   4   0 1392.54 32.2445   6
   5   4   0 1385.49 33.5236   4
   5   4   0 1408.85 33.6933   6
   6  -4   0 312.931 9.50034   3
  -6  -4   0 321.036 10.7442   4
  -6  -4   0 286.048 11.0213   5
   6  -4   0 328.277 11.0991   5
   6  -4   0 318.455 10.4248   7
  -6  -4   0 324.322 9.61854   3
  -6   4   0 320.557 9.68194   3
  -6   4   0 315.376 9.46406   6
   6   4   0 318.540 10.5875   6
  -6   4   0 304.580 11.1956   7
   6   4   0 310.367 10.2520   3
  -7  -4   0 53.0018 3.94617   4
   7  -4   0 57.8871 3.36027   3
  -7  -4   0 55.3528 4.08451   3
   7  -4   0 59.1095 4.30281   5
   7  -4   0 56.6528 3.69419   6
  -7  -4   0 52.8622 3.83133   5
   7   4   0 54.8697 3.87542   4
   7   4   0 55.5740 3.95387   6
   7   4   0 54.6910 3.77442   3
  -7   4   0 52.6496 4.29142   7
  -7   4   0 54.2872 3.35165   6
  -7   4   0 58.7228 3.49034   3
  -8  -4   0 446.329 12.4782   3
   8  -4   0 445.411 13.3802   6
   8  -4   0 434.666 14.5177   5
   8  -4   0 430.828 12.4865   3
  -8  -4   0 432.696 13.8831   5
  -8  -4   0 441.170 12.1592   7
   8  -4   0 418.680 13.4326   7
  -8  -4   0 409.294 13.7734   4
  -8   4   0 443.862 12.5971   3
  -8   4   0 450.510 15.1599   7
   8   4   0 411.729 13.4073   3
   8   4   0 447.606 13.8511   4
   8   4   0 458.207 14.0802   6
  -8   4   0 453.049 12.9200   6
  -9  -4   0 25.6640 2.53775   3
  -9  -4   0 17.7011 2.67319   4
  -9  -4   0 27.8229 2.44867   7
   9  -4   0 26.4309 3.51725   5
  -9  -4   0 26.2542 3.10979   5
   9  -4   0 26.1140 2.41364   3
   9  -4   0 27.1125 2.81078   7
   9  -4   0 28.2681 2.95491   6
   9   4   0 25.0568 2.88780   3
  -9   4   0 24.9554 2.47003   3
   9   4   0 24.3404 2.96185   4
   9   4   0 18.4629 2.59572   6
  -9   4   0 23.5349 2.50276   6
  -9   4   0 24.1471 4.02767   7
 -10  -4   0 79.7612 4.35837   3
  10  -4   0 83.7976 5.71456   5
  10  -4   0 78.2508 5.01451   6
  10  -4   0 81.0702 4.49622   3
 -10  -4   0 78.9281 5.37986   4
 -10  -4   0 74.0814 5.41722   5
 -10  -4   0 81.0065 4.44091   7
 -10   4   0 84.6149 6.20329   7
  10   4   0 80.0547 5.22689   4
  10   4   0 85.5168 5.49458   6
  10   4   0 76.3730 5.07682   3
 -10   4   0 82.9292 5.13100   6
 -10   4   0 75.6886 5.61467   3
 -11  -4   0 289.881 11.9454   5
  11  -4   0 277.321 10.6839   6
 -11  -4   0 268.637 11.2065   4
 -11  -4   0 287.546 9.50386   3
 -11  -4   0 290.414 9.90878   7
 -11   4   0 277.837 12.5272   7
 -11   4   0 268.015 10.2383   6
  11   4   0 288.445 10.9228   4
 -11   4   0 287.914 9.53234   3
  11   4   0 282.339 11.2764   6
  12  -4   0 128.311 6.98759   6
 -12  -4   0 116.563 7.61306   5
 -12  -4   0 121.033 6.17763   7
 -12  -4   0 114.926 5.57391   3
  12   4   0 125.580 7.27056   6
 -12   4   0 133.795 5.84190   3
  12   4   0 123.349 6.86232   4
 -12   4   0 128.511 8.44418   7
  13  -4   0 7.26944 2.18933   6
 -13  -4   0 8.90597 1.84274   3
 -13  -4   0 6.21710 1.91494   7
 -13   4   0 10.6315 1.96944   3
  13   4   0 11.0135 3.17913   6
  13   4   0 11.0495 2.76375   4
 -13   4   0 5.38147 2.62747   7
  14  -4   0 116.585 7.18138   6
 -14  -4   0 109.506 8.11956   5
 -14  -4   0 115.664 6.57978   7
 -14  -4   0 110.366 5.46998   3
  14   4   0 113.776 6.94508   4
 -14   4   0 101.920 5.04607   3
 -14   4   0 110.415 8.55106   7
  14   4   0 113.932 7.36677   6
  15  -4   0 31.3930 4.34962   6
 -15  -4   0 28.5720 4.71511   5
 -15  -4   0 28.0539 3.03853   3
 -15  -4   0 37.5403 4.02574   7
 -15   4   0 38.1128 6.01287   7
  15   4   0 36.4312 5.13087   6
  15   4   0 36.8468 4.33300   4
 -16  -4   0 93.8840 8.07379   5
  16  -4   0 89.9509 6.94051   6
 -16  -4   0 99.9474 5.08729   3
 -16  -4   0 90.9694 6.57934   7
 -16   4   0 107.446 9.08359   7
  16   4   0 98.9050 6.73814   4
  16   4   0 96.0239 7.47689   6
 -17  -4   0 53.2172 3.69893   3
  17  -4   0 49.6749 5.37336   6
 -17  -4   0 55.5473 6.57123   5
 -17  -4   0 62.3341 5.44461   7
 -17   4   0 52.7345 7.03338   7
  17   4   0 63.3624 6.19723   6
 -18  -4   0 6.59541 2.37980   7
  18  -4   0 -3.6472 1.65504   6
 -18  -4   0 -4.3637 1.91914   5
  18   4   0 -0.3939 2.01975   6
 -18   4   0 2.41203 2.62533   7
   0  -5   0 1.04102 0.78971   4
   0  -5   0 0.37027 0.75965   3
   0  -5   0 0.34135 0.63439   7
   0  -5   0 0.48662 0.63214   3
   0   5   0 -1.1380 0.40965   7
   0   5   0 -0.0104 0.60911   4
  -1  -5   0 304.409 9.57016   4
   1  -5   0 297.773 9.34593   3
   1  -5   0 292.965 9.64063   7
   1  -5   0 296.147 9.78404   3
  -1  -5   0 290.667 9.53227   7
   1  -5   0 298.277 9.02191   4
  -1  -5   0 285.748 9.33473   3
  -1   5   0 304.410 9.99977   7
  -1   5   0 293.313 9.00103   4
   1   5   0 302.375 9.56350   4
   1   5   0 294.949 9.60639   3
  -2  -5   0 131.341 5.58969   3
   2  -5   0 133.726 5.91054   3
   2  -5   0 127.061 4.93869   4
   2  -5   0 128.979 5.78751   7
  -2  -5   0 132.352 5.78745   4
  -2  -5   0 141.466 5.93836   3
   2  -5   0 128.823 5.41660   3
  -2  -5   0 129.816 5.49035   7
   2   5   0 120.486 5.58923   4
  -2   5   0 130.484 5.04373   4
   2   5   0 134.353 5.83672   3
  -2   5   0 128.531 6.09104   7
  -3  -5   0 592.522 16.7708   4
   3  -5   0 615.113 16.8560   7
  -3  -5   0 611.364 16.1388   7
   3  -5   0 608.282 16.1012   3
  -3  -5   0 640.129 16.6282   3
  -3  -5   0 588.540 16.2816   3
   3  -5   0 622.756 15.1036   4
   3   5   0 615.934 16.8173   3
  -3   5   0 589.207 17.2960   7
  -3   5   0 599.022 15.0837   4
   3   5   0 617.601 16.8193   4
  -3   5   0 601.578 15.7855   6
   4  -5   0 1.09827 0.58094   4
   4  -5   0 -0.1682 0.63188   7
  -4  -5   0 -0.0470 0.78558   3
  -4  -5   0 1.37621 0.89552   7
  -4  -5   0 1.47302 1.02513   4
   4  -5   0 1.35869 0.84353   3
  -4   5   0 0.93874 0.63236   4
   4   5   0 0.32283 0.72628   3
  -4   5   0 -0.1299 0.51025   6
  -4   5   0 -0.6648 0.95343   7
   4   5   0 0.93081 1.13379   4
  -5  -5   0 1303.89 31.2383   5
  -5  -5   0 1309.40 30.8343   3
   5  -5   0 1292.85 30.5333   3
   5  -5   0 1237.78 31.4254   7
  -5  -5   0 1259.18 31.7747   4
   5   5   0 1277.27 31.4959   3
  -5   5   0 1319.42 28.5774   4
  -5   5   0 1302.91 30.2210   6
  -5   5   0 1278.17 32.7671   7
   5   5   0 1299.23 31.7061   4
  -5   5   0 1346.53 30.8331   3
   6  -5   0 451.252 13.2560   3
  -6  -5   0 488.568 13.6389   3
  -6  -5   0 457.367 14.0985   5
  -6  -5   0 462.628 14.6979   4
   6  -5   0 492.133 14.6182   7
   6   5   0 500.530 14.8040   4
   6   5   0 449.377 14.2420   3
  -6   5   0 467.896 15.5651   7
   6   5   0 442.118 14.3398   6
  -6   5   0 482.703 13.6349   3
  -6   5   0 470.511 13.1436   6
  -6   5   0 474.516 11.1336   4
  -7  -5   0 83.2665 4.51201   3
   7  -5   0 77.8390 4.26797   3
  -7  -5   0 80.2989 4.92693   5
  -7  -5   0 72.4226 4.94390   4
   7  -5   0 79.9746 5.31909   5
   7   5   0 76.7210 5.01596   6
  -7   5   0 73.4178 4.12984   6
   7   5   0 70.9453 4.69659   3
  -7   5   0 76.4508 5.60440   7
   7   5   0 83.4211 5.13313   4
   8  -5   0 97.6082 7.54384   3
   8  -5   0 102.099 5.72487   7
  -8  -5   0 109.811 5.31748   3
   8  -5   0 117.730 6.76593   5
  -8  -5   0 105.313 5.99319   5
  -8  -5   0 95.7544 6.00385   4
  -8   5   0 103.014 5.16460   6
  -8   5   0 105.420 5.28105   3
   8   5   0 103.567 5.91305   3
   8   5   0 122.065 6.45097   6
  -8   5   0 104.048 6.80487   7
  -9  -5   0 368.868 13.3377   4
  -9  -5   0 373.333 11.4727   3
   9  -5   0 365.053 11.6175   3
  -9  -5   0 378.060 13.2068   5
   9  -5   0 358.026 13.6080   5
  -9  -5   0 367.542 11.0084   7
  -9   5   0 372.584 11.8478   6
  -9   5   0 380.243 11.6668   3
   9   5   0 337.316 13.3167   3
  -9   5   0 348.250 14.1408   7
   9   5   0 367.230 13.0859   6
   9   5   0 357.570 12.9116   4
 -10  -5   0 314.646 12.1543   5
 -10  -5   0 317.935 10.1404   7
 -10  -5   0 316.418 10.3521   3
 -10   5   0 311.596 10.3826   3
 -10   5   0 306.848 13.4302   7
 -10   5   0 296.990 10.6888   6
  10   5   0 308.687 11.8150   4
  10   5   0 294.784 11.8203   6
  11  -5   0 99.5535 6.11868   6
 -11  -5   0 95.1954 5.11587   3
 -11  -5   0 99.8090 5.13010   7
 -11  -5   0 98.8274 6.70795   5
  11   5   0 91.1847 6.14256   4
 -11   5   0 102.495 7.57388   7
 -11   5   0 100.457 5.20402   3
 -11   5   0 100.864 6.64328   6
  11   5   0 104.009 6.56423   6
 -12  -5   0 1.81183 1.24466   7
 -12  -5   0 0.10505 1.04881   3
  12  -5   0 -0.4457 0.99601   6
 -12  -5   0 2.35018 1.61401   5
  12   5   0 1.90556 1.53859   4
 -12   5   0 0.64979 1.10553   3
 -12   5   0 -1.0743 1.21794   7
  12   5   0 0.08552 1.16146   6
 -13  -5   0 119.047 8.14077   5
 -13  -5   0 121.652 5.95842   3
  13  -5   0 116.635 7.19765   6
 -13  -5   0 125.988 6.53068   7
  13   5   0 131.125 7.91607   6
  13   5   0 130.282 7.61239   4
 -13   5   0 117.889 8.84372   7
 -14  -5   0 88.9625 5.65135   7
 -14  -5   0 84.6317 7.16329   5
  14  -5   0 78.9135 6.15621   6
 -14  -5   0 89.7787 4.99530   3
  14   5   0 93.6442 6.96515   6
 -14   5   0 86.8900 7.96238   7
  15  -5   0 31.4834 4.51375   6
 -15  -5   0 50.9704 5.98448   5
 -15  -5   0 35.8905 4.46644   3
 -15  -5   0 41.1784 4.11363   7
 -15  -5   0 44.2202 3.60474   3
  15   5   0 44.1317 5.08673   6
 -15   5   0 46.1434 6.71928   7
  15   5   0 39.4533 4.71780   4
  16  -5   0 34.8988 4.88888   6
 -16  -5   0 53.8494 4.79695   7
 -16  -5   0 48.0592 3.66116   3
 -16  -5   0 46.2170 6.84682   5
  16   5   0 51.1187 5.81823   6
  16   5   0 59.8867 5.51932   4
 -16   5   0 48.4230 7.85547   7
 -17  -5   0 2.14752 2.79174   5
 -17  -5   0 -0.3521 1.82886   7
  17  -5   0 -0.8399 2.23829   6
 -17  -5   0 1.31511 1.40354   3
  17   5   0 -2.6645 2.11773   6
  17   5   0 2.64812 1.77731   4
 -17   5   0 1.30970 3.11169   7
   0  -6   0 371.026 11.6155   3
   0  -6   0 365.816 11.7283   7
   0  -6   0 370.457 11.4469   4
   0  -6   0 360.580 11.9829   3
   0   6   0 374.056 11.4952   4
   1  -6   0 3.87491 1.41932   3
   1  -6   0 4.47589 1.22209   4
  -1  -6   0 2.35113 1.12904   3
  -1  -6   0 3.65574 1.21019   4
   1  -6   0 3.58490 1.39273   7
  -1  -6   0 3.32646 1.38400   7
   1  -6   0 4.15235 1.18562   3
  -1  -6   0 4.10471 1.53538   3
  -1   6   0 2.25030 1.15985   7
   1   6   0 3.00034 1.28521   4
  -1   6   0 3.49906 1.29847   4
   2  -6   0 742.832 19.1303   4
   2  -6   0 768.814 20.7625   3
  -2  -6   0 765.245 20.4888   4
  -2  -6   0 792.987 20.2367   7
  -2  -6   0 753.268 20.4811   3
   2  -6   0 742.862 19.8522   3
  -2  -6   0 739.617 20.0343   3
   2  -6   0 760.717 20.5119   7
   2   6   0 724.098 20.2905   3
  -2   6   0 786.612 19.3719   4
   2   6   0 784.702 20.5385   4
  -3  -6   0 243.576 9.19384   4
   3  -6   0 230.343 8.48591   3
  -3  -6   0 232.228 8.89486   3
   3  -6   0 243.121 9.16746   7
   3  -6   0 239.887 9.24578   3
  -3  -6   0 245.874 8.68869   7
  -3  -6   0 230.641 8.68378   3
   3   6   0 236.601 9.07557   4
  -3   6   0 233.233 9.62354   7
  -3   6   0 229.893 7.72576   4
   3   6   0 246.082 9.24822   3
   4  -6   0 871.007 20.9612   4
  -4  -6   0 900.591 23.0333   3
   4  -6   0 891.971 23.5614   7
  -4  -6   0 916.239 23.8808   4
   4  -6   0 858.578 22.4808   3
  -4  -6   0 891.643 22.6062   7
  -4  -6   0 860.045 22.8570   3
  -4   6   0 901.185 24.6920   7
  -4   6   0 896.102 21.2034   4
   4   6   0 869.096 23.5024   3
  -4   6   0 859.680 22.0083   6
   4   6   0 871.465 23.5554   4
  -5  -6   0 844.871 22.8663   3
  -5  -6   0 900.417 23.3894   5
  -5  -6   0 881.652 24.1637   4
  -5  -6   0 893.696 22.8683   3
  -5  -6   0 872.952 22.4946   7
   5  -6   0 896.185 23.6698   7
   5  -6   0 863.249 22.4817   3
  -5   6   0 899.390 20.7290   4
  -5   6   0 849.268 24.7270   7
   5   6   0 867.679 23.6929   4
   5   6   0 865.538 23.7607   3
  -5   6   0 875.723 22.0576   6
  -6  -6   0 19.8641 2.75398   3
  -6  -6   0 29.0321 3.25038   4
  -6  -6   0 20.3847 3.18602   5
   6  -6   0 19.6644 2.84072   7
   6  -6   0 16.6091 3.79334   3
   6   6   0 23.0043 3.26074   4
  -6   6   0 19.0962 3.43160   7
  -6   6   0 24.4277 1.77258   4
   6   6   0 21.4285 3.53133   6
  -6   6   0 20.0596 2.30114   6
   6   6   0 22.0136 3.08384   3
  -7  -6   0 44.6509 3.87379   5
   7  -6   0 28.3197 3.19269   7
  -7  -6   0 39.1927 3.39373   3
   7  -6   0 37.6137 3.17702   3
  -7  -6   0 38.4869 3.74545   4
   7   6   0 36.8379 3.71342   4
  -7   6   0 35.7281 3.01724   6
   7   6   0 41.0515 3.91035   6
  -7   6   0 35.0904 4.06854   7
  -7   6   0 41.1029 1.91814   4
   7   6   0 32.9333 3.37229   3
  -8  -6   0 -0.4520 0.93832   5
   8  -6   0 0.78747 2.16941   5
  -8  -6   0 1.17132 1.18896   3
   8  -6   0 -0.2840 1.02899   3
   8   6   0 -0.1799 1.08466   6
  -8   6   0 0.52834 1.33533   7
   8   6   0 1.78443 1.60274   4
  -9  -6   0 24.8621 2.87729   3
  -9  -6   0 22.3395 3.55413   5
  -9   6   0 18.4592 3.30280   7
  -9   6   0 18.7666 2.67777   6
   9   6   0 19.7057 3.37777   6
   9   6   0 21.2252 3.30772   4
 -10  -6   0 24.2513 3.49848   5
 -10  -6   0 27.1236 2.98637   3
 -10  -6   0 33.3911 2.92286   7
 -10   6   0 30.8184 4.74902   7
 -10   6   0 26.5166 3.03087   6
  10   6   0 36.0766 4.02642   4
  10   6   0 26.0616 3.95586   6
 -11  -6   0 29.4897 3.16046   3
 -11  -6   0 35.9697 4.31565   5
 -11  -6   0 33.8045 3.11372   7
  11   6   0 38.0831 4.28906   6
  11   6   0 32.9039 4.01472   4
 -11   6   0 32.6690 5.22532   7
 -12  -6   0 44.5574 4.87081   5
 -12  -6   0 40.1551 3.88656   3
 -12  -6   0 46.8838 3.66670   7
 -12  -6   0 36.4081 3.45990   3
 -12   6   0 42.8438 6.54756   7
  12   6   0 39.1159 4.52291   4
  12   6   0 35.8934 4.31802   6
 -13  -6   0 230.823 11.8032   5
 -13  -6   0 235.587 9.22610   7
 -13  -6   0 231.364 8.94250   3
  13   6   0 228.847 11.1787   6
 -13   6   0 221.635 12.7882   7
  13   6   0 212.968 10.6040   4
 -14  -6   0 365.854 16.0457   5
 -14  -6   0 369.644 12.0987   3
 -14  -6   0 369.586 12.8463   7
 -14   6   0 365.745 17.4927   7
  14   6   0 355.353 14.7569   4
  14   6   0 375.984 15.3001   6
 -15  -6   0 174.708 7.53033   3
 -15  -6   0 163.566 8.22609   7
  15   6   0 190.259 10.5470   6
  15   6   0 176.748 9.88109   4
 -15   6   0 175.934 12.1671   7
 -16  -6   0 123.633 9.52645   5
 -16  -6   0 115.775 7.01979   7
 -16  -6   0 115.497 5.87228   3
  16   6   0 115.792 8.60186   6
  16   6   0 115.128 8.31135   4
 -16   6   0 130.783 10.6494   7
 -17  -6   0 35.0194 3.55829   3
 -17  -6   0 37.8233 4.83541   7
 -17  -6   0 32.4312 5.49991   5
  17   6   0 40.3312 5.94907   4
 -17   6   0 43.9234 7.50926   7
  17   6   0 31.9244 5.56230   6
   0  -7   0 1.65128 1.05266   3
   0  -7   0 0.99904 0.88121   7
   0  -7   0 0.91713 1.22301   3
   0  -7   0 -0.3389 0.60236   4
   0   7   0 0.51122 0.85909   4
  -1  -7   0 34.9326 3.47575   3
  -1  -7   0 32.8031 3.09530   4
   1  -7   0 33.7723 3.66008   3
   1  -7   0 41.4682 3.79499   3
  -1  -7   0 31.3600 3.08769   3
  -1  -7   0 29.7982 3.06082   7
   1  -7   0 37.1584 3.07285   4
   1  -7   0 36.3841 3.35952   7
   1   7   0 35.0599 3.37081   4
  -1   7   0 37.1470 3.61378   7
   2  -7   0 13.9843 2.59959   3
  -2  -7   0 16.9089 2.58458   4
   2  -7   0 19.6344 2.17502   4
   2  -7   0 14.3196 3.12454   3
  -2  -7   0 20.1030 2.90722   3
  -2  -7   0 16.8021 2.46562   7
  -2  -7   0 18.2590 2.73521   3
   2  -7   0 18.2425 2.71478   7
  -2   7   0 16.7124 2.76246   7
   2   7   0 14.7205 2.53466   4
  -2   7   0 19.3892 2.36717   4
   3  -7   0 491.978 15.1164   3
   3  -7   0 515.162 16.2476   3
  -3  -7   0 513.583 15.7971   3
   3  -7   0 515.802 14.2278   4
   3  -7   0 497.928 15.7647   7
  -3  -7   0 522.236 15.4128   7
   3   7   0 495.540 15.8628   3
  -3   7   0 522.344 16.8751   7
  -3   7   0 519.040 14.3981   4
   3   7   0 494.663 15.8168   4
  -4  -7   0 412.661 14.2162   4
   4  -7   0 419.482 13.3615   3
  -4  -7   0 419.885 13.3883   7
  -4  -7   0 426.293 14.0379   3
   4  -7   0 438.519 12.1035   4
  -4  -7   0 423.937 13.8046   3
   4  -7   0 423.469 14.4494   3
   4  -7   0 425.180 14.1740   7
   4   7   0 416.876 14.2396   3
  -4   7   0 406.331 12.8264   6
  -4   7   0 442.486 15.3784   7
  -4   7   0 419.804 12.1350   4
   4   7   0 431.140 14.3352   4
   5  -7   0 1317.16 32.9110   3
  -5  -7   0 1326.34 34.4656   4
  -5  -7   0 1390.58 33.4992   3
  -5  -7   0 1360.18 33.0386   7
   5  -7   0 1420.14 34.4472   7
  -5  -7   0 1321.12 33.4273   3
   5   7   0 1261.94 33.9914   3
  -5   7   0 1314.44 32.3207   6
  -5   7   0 1323.51 35.5399   7
   5   7   0 1379.60 34.4650   4
  -5   7   0 1364.47 31.0188   4
  -6  -7   0 1328.89 32.4272   7
  -6  -7   0 1291.89 33.1196   5
  -6  -7   0 1266.35 32.7763   3
  -6  -7   0 1301.94 32.4554   3
   6   7   0 1334.96 34.0429   4
  -6   7   0 1386.82 35.8482   7
   6   7   0 1285.90 33.9558   6
  -6   7   0 1304.54 29.6563   4
  -6   7   0 1265.06 31.5757   6
  -7  -7   0 148.873 7.36902   3
  -7  -7   0 150.760 7.04238   7
  -7  -7   0 157.691 7.25747   3
  -7  -7   0 155.956 7.82085   5
  -7   7   0 147.749 6.67513   6
  -7   7   0 147.368 8.85872   7
  -7   7   0 146.730 4.92345   4
   7   7   0 153.204 8.05722   6
  -8  -7   0 99.2895 5.95986   3
  -8  -7   0 95.5479 5.56695   3
  -8  -7   0 104.487 6.42515   5
  -8   7   0 90.4236 7.07309   7
   8   7   0 97.1443 6.52603   4
  -8   7   0 99.0885 5.40340   6
   8   7   0 101.039 6.61812   6
  -9  -7   0 3.19015 1.70207   5
  -9  -7   0 6.24614 1.75931   3
   9   7   0 4.45161 2.06317   6
  -9   7   0 3.30221 1.61563   6
   9   7   0 7.48740 2.58877   4
  -9   7   0 6.54681 2.58207   7
 -10  -7   0 57.1245 4.42087   3
 -10  -7   0 53.1749 5.14958   5
 -10   7   0 50.6592 5.91511   7
  10   7   0 59.5000 5.40857   4
  10   7   0 55.6561 5.31004   6
 -11  -7   0 86.8910 6.74206   5
 -11  -7   0 88.8567 5.44248   3
 -11  -7   0 85.8819 4.94337   7
  11   7   0 90.0947 6.73843   6
 -11   7   0 87.9471 7.78726   7
  11   7   0 75.9316 6.36108   4
 -12  -7   0 0.58752 1.19821   7
 -12  -7   0 -1.6672 1.46573   5
 -12  -7   0 1.25321 1.42195   3
  12   7   0 2.94731 2.01689   4
  12   7   0 1.15453 1.72662   6
 -12   7   0 0.72667 2.16564   7
 -13  -7   0 4.40124 1.79864   3
 -13  -7   0 5.30781 1.71320   7
 -13  -7   0 4.58146 2.51271   5
  13   7   0 4.33940 2.48568   6
  13   7   0 9.75185 2.95303   4
 -13   7   0 7.17110 3.22248   7
 -14  -7   0 23.0608 4.68962   5
 -14  -7   0 23.4041 3.33102   7
 -14  -7   0 17.7365 4.73910   3
  14   7   0 16.2065 3.75532   6
 -14   7   0 12.0494 4.09308   7
  14   7   0 20.5092 3.92491   4
 -15  -7   0 1.62322 1.46482   3
 -15  -7   0 4.16321 2.51334   5
 -15  -7   0 0.03206 1.49218   7
 -15   7   0 0.84054 2.67705   7
  15   7   0 2.11088 2.39270   6
  15   7   0 -1.4777 1.63625   4
 -16  -7   0 15.6734 2.65957   3
 -16  -7   0 9.28204 2.83531   7
 -16  -7   0 7.15077 3.39469   5
  16   7   0 10.7463 3.55629   4
  16   7   0 10.8904 3.36218   6
 -16   7   0 14.5700 4.42546   7
   0  -8   0 677.409 20.0807   7
   0  -8   0 693.113 19.9918   4
   0  -8   0 700.229 20.7947   3
   0  -8   0 675.274 20.2058   3
   0   8   0 716.141 19.9671   4
   1  -8   0 239.594 10.2287   3
  -1  -8   0 221.389 9.85772   3
  -1  -8   0 237.458 9.54857   7
   1  -8   0 220.188 8.84475   4
  -1  -8   0 220.552 9.35644   4
  -1  -8   0 230.525 9.56177   3
  -1   8   0 234.567 9.18977   4
   1   8   0 220.730 9.36191   4
  -2  -8   0 12.7480 2.36374   4
  -2  -8   0 14.9185 3.06379   3
  -2  -8   0 13.4678 2.80324   3
   2  -8   0 16.6100 3.21926   3
  -2  -8   0 18.2740 2.75338   7
   2  -8   0 16.3985 2.87385   7
   2  -8   0 16.9690 2.67204   4
  -2   8   0 10.8874 2.39310   7
  -2   8   0 13.6302 2.35347   4
   2   8   0 13.2816 2.53996   4
   3  -8   0 3.39838 1.65702   7
  -3  -8   0 6.58701 1.86905   7
   3  -8   0 4.64818 1.92004   3
  -3  -8   0 4.16438 1.87325   3
   3  -8   0 5.88060 1.65939   4
  -3  -8   0 3.29306 2.08811   4
   3   8   0 3.33809 1.73035   4
  -3   8   0 4.18144 2.09281   7
  -3   8   0 6.43215 1.67846   4
  -4  -8   0 214.549 9.02023   7
   4  -8   0 214.109 7.84327   4
  -4  -8   0 220.147 9.48430   3
   4  -8   0 227.609 10.2016   3
  -4   8   0 226.999 10.6975   7
   4   8   0 216.301 9.76873   4
  -4   8   0 212.964 8.04051   4
  -4   8   0 200.124 8.45656   6
  -5  -8   0 442.436 14.4689   7
  -5  -8   0 444.929 14.9072   3
   5  -8   0 481.639 16.3009   3
  -5   8   0 433.493 13.8381   6
  -5   8   0 455.854 16.8361   7
   5   8   0 429.923 15.5006   4
  -5   8   0 445.151 12.8871   4
  -6  -8   0 108.367 6.11476   7
  -6  -8   0 122.947 6.71958   3
  -6  -8   0 107.461 6.65336   5
  -6   8   0 109.402 4.87828   4
  -6   8   0 112.530 7.81585   7
   6   8   0 114.930 7.12867   4
   6   8   0 108.234 7.05555   6
  -6   8   0 107.334 5.77272   6
  -7  -8   0 8.09968 2.21056   3
  -7  -8   0 4.93634 1.77628   7
  -7  -8   0 11.2617 2.59089   5
   7   8   0 4.58669 1.99557   6
  -7   8   0 10.4959 1.53027   4
  -7   8   0 12.6874 2.68222   6
   7   8   0 5.93595 1.93054   4
  -7   8   0 5.99858 2.68844   7
  -8  -8   0 70.6255 5.05771   7
  -8  -8   0 78.0050 5.86767   5
  -8  -8   0 74.5866 5.30356   3
   8   8   0 75.1502 6.08077   4
  -8   8   0 75.6808 6.82633   7
   8   8   0 85.2972 6.29015   6
  -9  -8   0 23.8316 4.68545   5
  -9  -8   0 36.4043 3.73588   3
  -9  -8   0 26.2115 3.93647   7
  -9   8   0 21.7335 4.36779   7
   9   8   0 28.8353 4.43300   4
   9   8   0 36.9986 5.47669   6
 -10  -8   0 8.06043 2.28368   3
 -10  -8   0 3.82209 2.10566   7
 -10  -8   0 3.64204 2.03921   5
  10   8   0 6.28861 2.19413   4
 -10   8   0 4.55021 2.57506   7
  10   8   0 6.03050 2.52085   6
 -11  -8   0 12.4396 2.35990   7
 -11  -8   0 6.68272 2.60010   7
 -11  -8   0 13.9394 3.46477   5
 -11  -8   0 9.68694 2.42973   3
 -11   8   0 14.4302 3.99444   7
  11   8   0 8.89198 2.93394   6
  11   8   0 9.67233 2.88822   4
 -12  -8   0 6.38130 2.49780   5
 -12  -8   0 13.5838 2.77811   3
 -12  -8   0 12.1929 2.42918   7
  12   8   0 9.02373 2.99898   4
 -12   8   0 11.7388 3.76244   7
  12   8   0 17.2139 3.77953   6
 -13  -8   0 34.3600 5.68290   5
 -13  -8   0 31.3082 3.21445   7
 -13  -8   0 20.9292 3.29135   3
 -13   8   0 26.6327 5.07968   7
  13   8   0 36.7085 5.66588   6
  13   8   0 32.3997 4.97135   4
 -14  -8   0 137.134 6.97158   3
 -14  -8   0 138.639 6.90094   7
 -14  -8   0 115.616 9.25809   5
 -14   8   0 123.488 10.6276   7
  14   8   0 130.952 9.08379   4
  14   8   0 122.665 8.92223   6
 -15  -8   0 98.7805 6.00913   3
 -15  -8   0 103.679 8.88783   5
 -15  -8   0 108.499 6.41814   7
  15   8   0 106.104 8.31702   6
 -15   8   0 99.2994 10.0877   7
   0  -9   0 -0.8398 0.99113   7
   0  -9   0 -0.4462 1.26312   3
   0  -9   0 -1.4994 0.97402   4
   0   9   0 -0.1777 1.09005   4
   1  -9   0 103.881 6.10500   4
  -1  -9   0 106.548 6.48299   7
  -1  -9   0 108.014 7.00741   3
   1  -9   0 111.581 7.14268   3
  -1   9   0 111.333 6.28832   4
   1   9   0 113.455 6.69842   4
  -2  -9   0 138.778 7.39035   7
   2  -9   0 137.368 8.13486   3
   2  -9   0 140.736 6.91126   4
  -2  -9   0 148.393 8.06410   3
   2   9   0 150.976 7.95288   4
  -2   9   0 135.111 6.95565   4
   3  -9   0 1.40490 1.68405   3
   3  -9   0 0.52222 1.00683   4
  -3  -9   0 -0.2784 1.32599   7
  -3  -9   0 0.25092 1.23378   3
  -3   9   0 -0.0470 1.35224   7
   3   9   0 2.34905 1.63325   4
  -3   9   0 1.27786 1.12899   4
   4  -9   0 58.7189 5.38894   3
  -4  -9   0 46.5487 4.56749   3
   4  -9   0 42.1532 3.39799   4
  -4  -9   0 46.3170 4.22593   7
  -4   9   0 46.4410 3.69685   4
   4   9   0 46.9222 4.69943   4
  -4   9   0 55.2292 5.47766   7
  -5  -9   0 107.132 6.73109   3
  -5  -9   0 100.804 6.27447   7
   5  -9   0 115.395 7.58438   3
  -5   9   0 104.594 7.69736   7
  -5   9   0 101.324 5.33389   4
   5   9   0 108.633 7.18451   4
  -6  -9   0 147.584 8.04414   3
  -6  -9   0 144.296 7.60210   7
  -6  -9   0 150.164 8.42478   5
   6  -9   0 160.166 9.24071   3
  -6   9   0 143.725 9.36314   7
   6   9   0 155.703 8.92690   4
  -6   9   0 148.950 6.24279   4
  -7  -9   0 42.7501 4.19617   7
  -7  -9   0 41.4565 4.35850   3
  -7  -9   0 50.8192 5.00068   5
   7  -9   0 45.1523 5.13537   3
   7   9   0 54.3240 5.34751   4
   7   9   0 27.1951 5.50190   6
  -7   9   0 44.8055 2.97342   4
  -8  -9   0 10.2146 2.84641   5
  -8  -9   0 14.2916 4.49269   3
  -8  -9   0 8.55423 2.19670   7
  -8   9   0 6.13266 2.61657   7
   8   9   0 14.0947 3.01902   6
  -8   9   0 10.6345 1.40721   4
   8   9   0 9.22251 2.98444   4
  -9  -9   0 24.6454 4.22834   5
  -9  -9   0 20.8683 3.35019   7
  -9  -9   0 17.4301 3.16455   3
   9   9   0 29.7540 4.74323   6
  -9   9   0 26.0590 5.22778   7
   9   9   0 22.1034 3.88956   4
 -10  -9   0 34.5667 4.64216   5
 -10  -9   0 42.8284 4.28919   3
 -10  -9   0 38.4466 4.46999   7
  10   9   0 35.6016 5.35556   4
  10   9   0 34.3191 4.72754   6
 -10   9   0 31.6974 5.78687   7
 -11  -9   0 35.7190 3.35649   7
 -11  -9   0 30.8348 4.95524   5
 -11  -9   0 35.2536 4.07901   3
  11   9   0 33.0475 5.14882   4
 -11   9   0 32.2624 5.59534   7
  11   9   0 36.6570 5.12612   6
 -12  -9   0 0.26523 1.93844   5
 -12  -9   0 2.30156 1.45233   7
 -12  -9   0 1.17500 1.61793   3
  12   9   0 1.32369 2.34908   6
 -12   9   0 -0.5052 2.64660   7
  12   9   0 1.29843 2.12706   4
 -13  -9   0 119.272 9.08692   5
 -13  -9   0 110.077 6.12596   7
 -13  -9   0 114.753 6.72758   3
  13   9   0 111.412 10.2401   6
 -13   9   0 120.722 12.3237   7
  13   9   0 128.881 9.37567   4
 -14  -9   0 16.5919 2.97003   3
 -14  -9   0 16.3626 4.39083   5
 -14  -9   0 13.9360 2.63115   7
  14   9   0 18.0728 4.29767   6
  14   9   0 13.7656 3.99032   4
 -14   9   0 17.9332 4.83416   7
   0 -10   0 9.41016 2.73856   3
   0  10   0 12.5631 2.88404   4
  -1 -10   0 106.872 7.41728   3
   1 -10   0 109.620 7.65295   3
  -1  10   0 104.439 6.48339   4
   1  10   0 105.811 6.83615   4
  -2 -10   0 59.7029 6.56419   3
   2 -10   0 72.8826 7.32651   3
   2  10   0 53.2732 5.04986   4
  -2  10   0 47.0995 4.37852   4
   3 -10   0 51.5447 4.21215   4
  -3  10   0 56.2157 4.59936   4
   3  10   0 64.4423 5.62332   4
  -4 -10   0 120.063 7.50956   3
   4 -10   0 109.126 7.83997   3
   4 -10   0 101.397 5.68772   4
  -4  10   0 100.613 5.94932   4
  -4  10   0 106.472 7.88705   7
  -5 -10   0 122.098 7.65924   3
   5 -10   0 116.457 8.23378   3
  -5  10   0 123.707 11.3863   7
   5  10   0 112.523 7.74339   4
  -5  10   0 102.557 5.78759   4
  -6 -10   0 9.41189 2.79231   5
   6 -10   0 6.31899 2.85158   3
  -6 -10   0 4.98964 2.30173   3
  -6  10   0 7.45661 2.80827   7
   6  10   0 6.07119 2.67103   6
  -6  10   0 11.4420 2.28496   4
   6  10   0 7.49958 2.53687   4
  -7 -10   0 3.36772 1.96499   3
   7 -10   0 8.24100 3.06889   3
  -7 -10   0 9.24636 2.70135   5
   7  10   0 8.25454 2.68757   4
   7  10   0 8.52518 2.83509   6
  -7  10   0 8.36430 1.68589   4
  -7  10   0 4.65071 2.90131   7
   8 -10   0 4.25327 2.53363   3
  -8 -10   0 1.09715 1.68715   3
  -8 -10   0 3.41212 2.09431   5
   8  10   0 2.52237 2.51704   6
  -8  10   0 2.21816 1.04480   4
  -8  10   0 1.75387 1.93537   7
   8  10   0 1.35162 1.86922   4
   9 -10   0 1.52070 2.23591   3
  -9 -10   0 -0.7309 1.53536   3
  -9 -10   0 2.05473 1.74626   5
  -9  10   0 -1.4776 1.87479   7
   9  10   0 -1.0468 1.51628   4
   9  10   0 0.69687 2.01854   6
 -10 -10   0 42.7971 6.20015   5
 -10 -10   0 52.0434 4.95931   3
 -10  10   0 60.9499 6.82310   7
  10  10   0 62.7026 6.38437   4
  10  10   0 51.7112 5.81565   6
 -11 -10   0 2.00066 1.40357   7
 -11 -10   0 1.12571 1.77886   3
 -11 -10   0 0.37909 2.08054   5
  11  10   0 3.18108 2.30095   6
 -11  10   0 0.41789 2.41719   7
  11  10   0 2.67050 2.19113   4
 -12 -10   0 -2.1605 1.60433   7
 -12 -10   0 1.19918 1.96899   3
 -12 -10   0 -2.5540 1.53958   5
  12  10   0 0.23138 2.23562   4
  12  10   0 2.79511 2.36976   6
 -12  10   0 -0.0800 2.27312   7
 -13 -10   0 83.1666 6.23868   3
 -13 -10   0 88.4122 5.52936   7
 -13 -10   0 80.8666 7.93310   5
  13  10   0 86.6013 7.87113   6
 -13  10   0 78.9252 9.09283   7
  13  10   0 86.6629 8.16439   4
   0 -11   0 1.47750 2.01694   3
   0  11   0 1.20811 1.46697   4
  -1 -11   0 15.8628 3.84196   3
   1 -11   0 11.2132 3.20787   3
  -1  11   0 9.99567 2.72705   4
   2 -11   0 37.3630 5.31075   3
  -2 -11   0 46.4816 5.46368   3
   2  11   0 38.7930 4.68757   4
  -2  11   0 50.6695 4.69794   4
  -3 -11   0 134.292 8.64582   3
   3 -11   0 131.205 8.89172   3
  -3  11   0 138.058 7.50492   4
   3  11   0 132.667 8.50877   4
   4 -11   0 47.5671 5.62650   3
  -4 -11   0 55.0231 5.69626   3
   4  11   0 48.8921 5.39920   4
  -4  11   0 56.2443 4.61244   4
   5 -11   0 296.065 14.3751   3
  -5 -11   0 297.451 13.1306   3
  -5  11   0 298.837 14.9000   7
   5  11   0 300.694 13.8483   4
  -5  11   0 278.336 10.8831   4
  -6 -11   0 253.632 12.3971   5
  -6 -11   0 270.500 12.1030   3
   6 -11   0 251.458 13.1450   3
  -6  11   0 230.582 9.20983   4
   6  11   0 235.687 12.3450   4
  -6  11   0 230.888 13.2141   7
   6  11   0 233.018 12.1885   6
  -7 -11   0 62.6667 5.88761   3
   7 -11   0 70.3777 7.19869   3
  -7 -11   0 57.1546 6.10274   5
   7  11   0 64.3759 6.43539   6
  -7  11   0 52.8262 3.97408   4
  -7  11   0 56.2108 7.40705   7
   7  11   0 58.1341 6.33117   4
  -8 -11   0 0.18896 1.92917   5
   8 -11   0 -3.0697 1.85939   3
  -8 -11   0 1.03877 1.82631   3
   8  11   0 1.34654 1.99151   6
  -8  11   0 3.16599 2.51047   7
   8  11   0 0.04317 1.87030   4
  -8  11   0 1.96744 1.20299   4
  -9 -11   0 3.47314 2.19774   3
  -9 -11   0 3.81805 2.53227   5
   9 -11   0 6.56047 3.10334   3
   9  11   0 4.27658 2.71674   4
  -9  11   0 3.48248 3.19241   7
   9  11   0 9.05320 3.40179   6
  10 -11   0 15.2685 4.25892   3
 -10 -11   0 12.3571 3.25155   3
 -10 -11   0 13.1089 3.90012   5
  10  11   0 18.0405 4.49365   4
  10  11   0 18.5944 6.72879   6
 -10  11   0 13.2985 7.06173   7
 -11 -11   0 37.4448 3.88824   7
 -11 -11   0 30.1028 4.51441   3
  11 -11   0 34.9150 5.94765   3
 -11 -11   0 27.6297 5.00954   5
 -11  11   0 28.7506 6.19166   7
  11  11   0 35.4248 5.58878   6
  11  11   0 37.3229 6.31171   4
   0 -12   0 203.622 11.6364   3
   0  12   0 192.381 10.1941   4
  -1 -12   0 55.1839 6.24381   3
   1 -12   0 59.6337 6.56178   3
   1  12   0 52.4990 5.40671   4
  -1  12   0 53.3086 5.32490   4
   2 -12   0 26.4322 4.82854   3
  -2 -12   0 29.9313 5.13647   3
   2  12   0 20.4693 3.91506   4
  -2  12   0 19.1192 3.83678   4
   3 -12   0 20.3323 4.53815   3
  -3 -12   0 22.3338 4.35355   3
  -3  12   0 20.6982 3.60202   4
   3  12   0 28.0079 4.73241   4
  -4 -12   0 2.32341 2.19684   3
   4 -12   0 1.68585 2.23530   3
   4  12   0 -2.2735 1.65567   4
  -4  12   0 -2.6140 1.36155   4
  -5 -12   0 38.5567 5.89372   5
  -5 -12   0 36.1416 5.35946   3
   5 -12   0 42.3591 6.21868   3
   5  12   0 37.6251 5.68473   4
   5  12   0 19.7667 3.99491   6
  -5  12   0 33.5481 3.75439   4
  -6 -12   0 19.0759 3.80230   5
  -6 -12   0 16.1938 3.63323   3
   6 -12   0 20.0154 4.56596   3
   6  12   0 17.4021 3.85904   6
   6  12   0 22.9560 5.01565   4
  -6  12   0 20.4565 3.02911   4
   7 -12   0 2.41827 2.38756   3
  -7 -12   0 7.23826 5.46542   5
  -7 -12   0 0.39447 1.85286   3
  -7  12   0 0.64908 1.75669   4
   7  12   0 0.53284 2.20966   6
   7  12   0 1.04876 2.35791   4
  -7  12   0 -1.2830 2.05709   7
   8 -12   0 60.5683 7.11878   3
  -8 -12   0 50.2867 6.12646   5
  -8 -12   0 43.7677 5.63467   3
   8  12   0 39.2283 5.67826   6
   8  12   0 45.9370 6.48539   4
  -8  12   0 46.2715 10.1862   7
  -9 -12   0 5.39652 2.94510   3
  -9 -12   0 8.58879 3.37183   5
   9 -12   0 10.6589 3.98912   3
   9  12   0 2.96687 2.86018   4
  -9  12   0 8.54839 3.28840   7
   9  12   0 17.7825 4.24871   6
   0  13   0 0.59058 1.87797   4
  -1 -13   0 34.0598 8.80661   3
  -1  13   0 34.7565 5.19760   4
   1  13   0 35.0216 5.16998   4
   2 -13   0 18.6205 5.43695   3
  -2  13   0 28.9932 4.45090   4
   2  13   0 21.1796 4.30792   4
   3 -13   0 16.1050 4.21966   3
  -3 -13   0 6.82063 3.44516   3
  -3  13   0 10.4724 2.68668   4
   3  13   0 12.7008 3.84428   4
   4 -13   0 27.5837 5.33623   3
  -4 -13   0 32.0370 5.26515   3
   4  13   0 41.0769 7.94947   4
  -4  13   0 31.2075 4.03413   4
  -5 -13   0 14.8414 3.83914   5
   5 -13   0 24.2315 5.28161   3
  -5 -13   0 21.6005 4.38026   3
   5  13   0 19.4525 4.43456   4
   5  13   0 16.3873 4.07132   6
   6 -13   0 -0.0297 2.76205   3
  -6 -13   0 0.82055 2.36351   3
  -6 -13   0 3.15773 2.60863   5
   6  13   0 0.78017 2.50712   6
  -6  13   0 5.26850 2.36020   4
   6  13   0 1.76230 2.44968   4
 -19   0   1 -1.4888 2.47439   7
  18   0  -1 0.26924 1.54916   6
 -18   0   1 -2.0872 2.26577   7
 -17   0   1 -2.8606 1.69036   5
 -17   0   1 0.35386 1.76837   7
  17   0  -1 -0.7583 1.31104   6
  16   0  -1 -1.7722 1.32766   6
 -16   0   1 -0.5507 1.86970   5
 -16   0   1 0.12091 1.26921   4
 -15   0   1 -0.3855 1.19826   7
 -15   0   1 -0.9931 0.95123   4
 -15   0   1 -2.4286 1.01456   5
  15   0  -1 -0.2588 1.39188   6
 -15   0   1 0.73217 0.82278   3
 -14   0   1 0.85726 0.85679   4
 -14   0   1 0.62163 0.81438   3
 -14   0   1 0.54360 1.66003   5
 -14   0   1 0.05195 1.15167   7
  14   0  -1 0.47544 1.31234   6
 -13   0   1 1.93548 1.55814   7
 -13   0   1 0.57683 0.79607   4
 -13   0   1 0.32392 0.79368   3
 -13   0   1 -0.3368 1.41043   5
  13   0  -1 -0.9959 1.06650   6
  12   0  -1 -1.5184 0.63170   3
  12   0  -1 0.99600 1.32990   6
 -12   0   1 -0.2283 0.72587   3
 -12   0   1 -0.9787 0.86168   6
 -12   0   1 0.15796 1.27671   5
 -12   0   1 0.43603 0.74319   4
 -12   0   1 1.35207 1.33495   7
  11   0  -1 -1.9922 0.86710   3
 -11   0   1 0.42480 1.17614   5
 -11   0   1 2.55080 0.93353   4
 -11   0   1 0.62595 0.77979   3
 -11   0   1 0.52898 1.03390   7
  11   0  -1 -0.5856 0.74409   5
  11   0  -1 -0.4585 0.86865   6
  11   0  -1 -0.1846 0.62508   4
 -11   0   1 -0.4264 0.96580   6
 -10   0   1 2.09982 1.24263   7
 -10   0   1 1.53723 0.90059   4
  10   0  -1 1.15432 1.17221   6
 -10   0   1 1.33298 1.43685   5
  10   0  -1 1.16309 0.83461   4
 -10   0   1 0.85160 0.81704   3
 -10   0   1 0.20452 0.94476   6
  10   0  -1 0.60899 0.73716   7
  10   0  -1 -0.3019 0.97498   5
   9   0  -1 0.23450 0.66082   4
   9   0  -1 -1.1117 0.49538   3
   9   0  -1 -0.8020 0.66467   5
  -9   0   1 0.82149 1.06573   5
   9   0  -1 1.72909 1.11484   6
  -9   0   1 0.59802 0.93445   7
   9   0  -1 0.32485 0.65865   7
  -9   0   1 1.27591 0.73389   4
  -9   0   1 0.49202 0.65661   6
  -9   0   1 0.36815 0.64093   3
  -8   0   1 0.39412 0.51630   3
   8   0  -1 0.51751 0.52196   7
   8   0  -1 0.59001 0.59631   4
   8   0  -1 -0.6048 0.51581   5
  -8   0   1 -0.6191 0.59068   6
   8   0  -1 -0.8633 0.50863   6
   8   0  -1 0.22766 0.51004   3
  -8   0   1 -0.1061 0.82593   5
  -8   0   1 -1.1424 0.39814   4
  -8   0   1 1.92232 1.09871   7
   7   0  -1 -0.2326 0.56179   5
   7   0  -1 0.03180 0.48242   4
  -7   0   1 0.39778 0.50201   3
   7   0  -1 -0.1487 0.47208   6
  -7   0   1 0.24898 0.61421   7
  -7   0   1 -0.5658 0.41114   6
   7   0  -1 0.43887 0.63132   7
  -7   0   1 0.00685 0.48267   4
  -7   0   1 1.11058 0.76868   5
  -6   0   1 0.24271 0.62281   5
  -6   0   1 0.24179 0.40310   4
  -6   0   1 0.42215 0.50268   6
  -6   0   1 1.35705 0.53527   3
   6   0  -1 0.71614 0.47395   7
   6   0  -1 0.07610 0.45993   6
   6   0  -1 0.37818 0.42543   4
   6   0  -1 -0.3553 0.31796   3
  -6   0   1 0.45726 0.54584   7
   5   0  -1 1.62380 0.58130   7
  -5   0   1 0.14537 0.52798   5
   5   0  -1 0.58859 0.41434   3
  -5   0   1 0.70756 0.51036   7
  -5   0   1 0.22541 0.36719   4
   5   0  -1 0.59730 0.50671   6
  -5   0   1 0.47120 0.42210   3
   5   0  -1 0.26987 0.37764   4
   5   0  -1 0.34464 0.52707   5
  -5   0   1 0.13073 0.37632   6
  -4   0   1 0.34677 0.52469   5
   4   0  -1 -0.0051 0.29575   3
  -4   0   1 0.07386 0.29538   3
  -4   0   1 -0.1917 0.26866   4
  -4   0   1 -0.4558 0.34426   6
  -4   0   1 0.69548 0.45630   7
   4   0  -1 0.75412 0.55520   5
   4   0  -1 -0.0306 0.28932   7
   4   0  -1 0.38387 0.32304   4
   4   0  -1 0.21445 0.39369   6
   3   0  -1 0.18806 0.25016   7
  -3   0   1 0.71305 0.39598   7
  -3   0   1 0.15613 0.24527   4
   3   0  -1 0.51628 0.28216   3
   3   0  -1 0.02365 0.23486   4
   3   0  -1 0.58408 0.44650   5
   3   0  -1 0.10248 0.26977   6
  -3   0   1 -0.0322 0.20330   3
  -3   0   1 -0.2389 0.36419   5
  -3   0   1 0.28759 0.30041   6
  -2   0   1 0.20099 0.17751   3
  -2   0   1 0.66354 0.29245   7
   2   0  -1 0.28669 0.19918   4
  -2   0   1 0.29665 0.21759   4
  -2   0   1 0.26536 0.21069   6
   2   0  -1 0.49332 0.19243   3
   2   0  -1 0.07058 0.19930   7
   2   0  -1 0.27141 0.23078   6
   2   0  -1 0.13790 0.23386   5
  -2   0   1 0.17041 0.29209   5
  -1   0  -1 0.88052 0.24016   3
  -2   0  -1 0.13621 0.19101   4
  -2   0  -1 0.60779 0.28576   3
  -2   0  -1 -0.2063 0.21183   7
   2   0   1 0.21601 0.21291   3
   2   0   1 0.32082 0.23183   4
   2   0   1 0.24482 0.24905   5
  -2   0  -1 0.12717 0.31844   5
  -2   0  -1 0.12073 0.18966   6
   2   0   1 0.20033 0.15833   7
   2   0   1 1.60448 0.46324   6
  -3   0  -1 0.18174 0.31603   7
  -3   0  -1 0.28764 0.30880   3
  -3   0  -1 0.00921 0.36225   5
  -3   0  -1 0.31364 0.31018   4
   3   0   1 0.37614 0.27531   6
   3   0   1 -0.0060 0.24854   7
  -3   0  -1 0.66820 0.35113   6
   3   0   1 0.10378 0.32742   5
   3   0   1 0.46088 0.31673   4
   3   0   1 0.03910 0.25972   3
  -4   0  -1 0.15960 0.31393   4
  -4   0  -1 0.30111 0.42883   5
   4   0   1 0.24514 0.40196   3
   4   0   1 0.40624 0.35836   4
   4   0   1 0.33930 0.40549   7
  -4   0  -1 0.96277 0.47224   3
  -4   0  -1 0.68912 0.47098   7
   4   0   1 0.31652 0.46454   5
   4   0   1 0.39493 0.46433   6
  -4   0  -1 1.03651 0.44391   6
   5   0   1 0.11087 0.34183   7
  -5   0  -1 -0.1114 0.38434   6
  -5   0  -1 0.16469 0.41768   3
   5   0   1 0.20807 0.42011   3
   5   0   1 1.00741 0.66355   5
   5   0   1 -0.4490 0.39080   6
   5   0   1 0.16434 0.42112   4
  -5   0  -1 0.26775 0.55379   7
  -5   0  -1 -0.4646 0.34206   4
  -5   0  -1 0.26017 0.50690   5
   6   0   1 0.30217 0.50952   5
   6   0   1 -0.3045 0.35560   4
  -6   0  -1 0.50677 0.57432   7
   6   0   1 0.50270 0.55649   6
  -6   0  -1 -0.4089 0.40527   5
  -6   0  -1 0.84661 0.56065   4
   6   0   1 -0.0185 0.37009   3
  -6   0  -1 0.49799 0.47966   3
   6   0   1 3.63375 0.91816   7
   7   0   1 1.00093 0.68219   6
  -7   0  -1 0.39344 0.62646   5
   7   0   1 -0.1003 0.48658   5
  -7   0  -1 -0.2609 0.45660   3
   7   0   1 0.72131 0.57651   7
  -7   0  -1 0.55194 0.63527   7
   7   0   1 -0.0161 0.48033   4
   7   0   1 0.47411 0.51950   3
  -7   0  -1 -0.3707 0.35461   4
  -7   0  -1 0.50414 0.52553   6
   8   0   1 -0.1610 0.70234   5
  -8   0  -1 0.09072 0.48825   4
   8   0   1 0.55582 0.57576   7
  -8   0  -1 0.15504 0.63461   6
  -8   0  -1 -0.6438 0.62588   5
  -8   0  -1 -0.2538 0.71196   7
   8   0   1 -0.1986 0.86425   6
   8   0   1 0.84748 0.63873   4
   8   0   1 0.63897 0.67214   3
  -8   0  -1 -0.0419 0.68812   3
  -9   0  -1 -0.1269 0.87393   7
   9   0   1 0.54919 0.73119   3
   9   0   1 0.84491 0.75008   4
  -9   0  -1 1.16609 1.14616   6
  -9   0  -1 -0.0189 0.60232   4
  -9   0  -1 -0.6493 0.71873   5
   9   0   1 0.32006 0.78097   5
   9   0   1 -0.4828 0.63300   6
  -9   0  -1 -0.1939 0.63461   3
 -10   0  -1 1.03756 1.03287   6
 -10   0  -1 0.22282 1.15406   5
  10   0   1 0.83549 0.92864   5
 -10   0  -1 0.27856 0.76333   4
  10   0   1 -0.2964 0.97921   6
  10   0   1 -0.5029 0.69748   3
 -10   0  -1 0.46697 0.82844   3
 -10   0  -1 -0.5390 0.87623   7
  11   0   1 1.25450 1.33822   6
 -11   0  -1 -1.3499 0.74580   6
 -11   0  -1 0.57776 1.34920   5
  11   0   1 0.68812 0.91927   3
 -11   0  -1 -0.4492 1.11859   7
 -11   0  -1 0.78722 0.79951   4
  11   0   1 0.23329 0.86625   5
 -12   0  -1 1.18355 1.23087   7
  12   0   1 -0.2682 1.06130   6
  12   0   1 -1.8760 1.50999   3
 -12   0  -1 0.33906 0.83863   4
 -12   0  -1 0.38854 0.94136   3
 -12   0  -1 0.68334 1.33137   5
 -13   0  -1 1.87991 1.05782   3
 -13   0  -1 -0.4417 0.80418   4
 -13   0  -1 -2.7499 0.90419   7
 -13   0  -1 -0.2790 1.41938   5
  13   0   1 -1.6053 1.04423   6
 -14   0  -1 0.75668 1.40237   5
 -14   0  -1 -0.5876 0.89964   3
 -14   0  -1 0.32909 1.11337   7
 -14   0  -1 -0.2685 0.83689   4
  14   0   1 -0.5346 1.14107   6
 -15   0  -1 0.81316 1.10668   3
 -15   0  -1 -0.7450 1.32955   5
 -15   0  -1 1.02829 1.11617   4
 -15   0  -1 -0.3848 1.39580   7
  15   0   1 -0.0688 1.29037   6
 -16   0  -1 -0.7702 1.02119   3
 -16   0  -1 0.05798 1.28598   7
 -16   0  -1 -0.8963 1.55473   4
 -16   0  -1 1.39791 2.12856   5
  16   0   1 -0.2346 1.39242   6
  17   0   1 -0.5871 1.59920   6
 -17   0  -1 -0.0269 1.57649   7
 -17   0  -1 1.80113 2.09409   5
  18   0   1 2.00772 2.15841   6
 -18   0  -1 2.05899 2.55411   7
 -19   0  -1 -3.6859 2.00924   7
  19   0   1 0.85456 2.21821   6
 -19  -1   1 11.7248 3.53505   7
  19  -1  -1 3.12780 2.56143   6
 -19  -1   1 4.05493 2.71431   5
 -19   1   1 6.11134 3.52411   7
  19   1  -1 8.31785 3.08842   6
  18  -1  -1 10.7384 3.27799   6
 -18  -1   1 15.4251 3.94328   7
 -18  -1   1 7.55812 3.21042   5
 -18   1   1 11.4040 3.90834   7
  18   1  -1 16.9854 3.50578   6
  17  -1  -1 0.27312 1.34707   6
 -17  -1   1 1.83488 1.64037   7
 -17  -1   1 -0.4558 1.99160   5
  17   1  -1 0.76190 1.73201   6
 -17   1   1 -3.9372 1.46071   7
  16  -1  -1 15.0801 3.08715   6
 -16  -1   1 12.7828 2.49454   4
 -16  -1   1 6.65056 2.81902   5
 -16  -1   1 15.5549 3.37340   7
 -16   1   1 10.1462 3.11282   7
  16   1  -1 17.9009 3.67314   6
 -16   1   1 14.5688 1.63665   4
 -15  -1   1 23.0924 3.15932   4
 -15  -1   1 28.5221 5.22045   5
  15  -1  -1 22.2588 3.41531   6
 -15  -1   1 25.9405 4.20349   7
 -15  -1   1 21.1583 2.27647   3
 -15   1   1 14.9123 1.78882   4
 -15   1   1 20.9237 3.61529   7
  15   1  -1 27.5292 4.68991   6
 -15   1   1 20.1368 1.88070   3
 -14  -1   1 20.3877 3.52929   7
  14  -1  -1 22.8805 3.82565   6
 -14  -1   1 24.0771 3.97802   5
 -14  -1   1 23.8703 2.90088   4
  14   1  -1 21.8023 3.90393   6
 -14   1   1 20.9523 1.95726   4
 -14   1   1 20.3641 4.13226   5
 -14   1   1 16.6293 3.21126   7
 -14   1   1 22.7043 2.16722   3
  13  -1  -1 11.1113 2.38850   6
 -13  -1   1 12.8299 2.31290   4
 -13  -1   1 14.2883 1.99739   3
 -13  -1   1 11.0362 2.41655   7
 -13  -1   1 16.2654 3.77934   5
 -13   1   1 11.9632 1.67491   4
  13   1  -1 14.9595 2.42510   4
 -13   1   1 14.6396 1.90447   3
 -13   1   1 12.1470 3.02449   7
 -13   1   1 11.5685 3.26484   5
  13   1  -1 13.4598 3.05252   6
  12  -1  -1 1.24739 1.05712   7
 -12  -1   1 1.33709 0.95837   3
  12  -1  -1 0.65758 1.18958   6
 -12  -1   1 0.79429 1.25355   7
 -12  -1   1 1.59980 1.06220   4
  12  -1  -1 0.11736 0.91288   3
 -12  -1   1 2.80493 1.75780   5
  12   1  -1 0.62850 1.21151   6
 -12   1   1 1.62792 1.32725   7
 -12   1   1 2.49018 1.04981   3
  12   1  -1 3.00773 1.29508   3
  12   1  -1 2.89133 1.49155   4
 -12   1   1 1.15765 1.62068   5
 -12   1   1 1.19071 0.82200   4
 -12   1   1 -0.3195 0.94230   6
 -11  -1   1 52.6042 4.12512   7
  11  -1  -1 53.5266 4.39923   5
 -11  -1   1 50.3577 4.74986   5
  11  -1  -1 50.4748 4.01496   6
  11  -1  -1 57.1875 3.78996   3
 -11  -1   1 44.3058 4.02842   6
 -11  -1   1 57.6307 3.28231   3
 -11  -1   1 53.2181 3.65692   4
 -11   1   1 61.3097 4.88679   7
  11   1  -1 53.8595 4.19227   5
 -11   1   1 54.7625 2.90967   4
 -11   1   1 47.4078 4.74014   5
  11   1  -1 56.5242 3.62520   4
 -11   1   1 52.6363 3.14194   3
  11   1  -1 54.2338 4.18604   6
 -10  -1   1 723.438 18.7587   4
  10  -1  -1 702.304 18.2067   3
  10  -1  -1 716.860 19.2880   6
 -10  -1   1 716.407 17.5776   3
 -10  -1   1 726.675 20.1284   6
 -10  -1   1 727.599 21.2081   5
 -10  -1   1 707.532 21.0817   7
  10  -1  -1 714.003 20.2895   5
  10  -1  -1 698.839 18.7931   7
 -10   1   1 680.044 16.9406   4
  10   1  -1 698.061 18.7025   3
 -10   1   1 728.617 17.5891   3
  10   1  -1 716.700 18.3125   4
  10   1  -1 718.228 20.0464   5
 -10   1   1 745.360 20.6223   7
 -10   1   1 712.672 21.5162   5
  10   1  -1 715.896 19.4957   6
 -10   1   1 707.889 19.5340   6
  -9  -1   1 848.904 22.9266   5
   9  -1  -1 825.298 20.0253   3
   9  -1  -1 799.899 20.5493   7
  -9  -1   1 848.592 19.5793   3
  -9  -1   1 813.719 20.9651   7
  -9  -1   1 804.054 21.6305   6
  -9  -1   1 805.445 20.4471   4
   9  -1  -1 833.741 22.1118   5
  -9   1   1 774.738 21.7970   7
  -9   1   1 833.756 23.2531   5
  -9   1   1 813.438 19.4777   3
   9   1  -1 813.517 21.1826   6
   9   1  -1 809.177 20.1086   4
   9   1  -1 800.093 21.5211   5
  -9   1   1 853.626 21.3997   6
  -9   1   1 838.679 18.9863   4
   9   1  -1 798.117 20.3951   3
  -8  -1   1 1531.62 38.0266   5
   8  -1  -1 1550.02 35.1346   3
  -8  -1   1 1572.55 36.8837   6
  -8  -1   1 1618.95 34.9065   3
   8  -1  -1 1600.52 35.9514   7
  -8  -1   1 1481.86 35.8952   7
   8  -1  -1 1580.14 37.3934   5
  -8  -1   1 1620.04 35.9902   4
   8  -1  -1 1572.57 36.1982   6
  -8   1   1 1610.61 34.8853   3
   8   1  -1 1561.93 35.6442   3
  -8   1   1 1608.99 36.4345   6
   8   1  -1 1579.01 36.9112   5
   8   1  -1 1645.10 35.6504   4
   8   1  -1 1559.54 36.4658   6
  -8   1   1 1583.70 34.2402   4
  -8   1   1 1567.46 38.3419   5
  -8   1   1 1552.16 37.1000   7
  -7  -1   1 989.799 25.0742   5
  -7  -1   1 1008.86 24.4016   6
   7  -1  -1 1022.24 24.9464   5
   7  -1  -1 997.279 23.7573   6
  -7  -1   1 999.355 23.5582   4
  -7  -1   1 996.070 22.6748   3
   7  -1  -1 1009.70 23.1099   3
   7  -1  -1 1020.84 23.7160   7
  -7  -1   1 989.453 23.5206   7
  -7   1   1 997.103 23.8454   6
  -7   1   1 1005.52 22.0536   4
   7   1  -1 1004.30 23.3225   3
  -7   1   1 1019.52 22.6906   3
   7   1  -1 970.159 23.9466   6
  -7   1   1 991.352 25.5266   5
   7   1  -1 987.856 24.3451   5
  -7   1   1 983.000 24.4963   7
   7   1  -1 981.470 23.2967   4
  -6  -1   1 56.9395 3.49091   5
   6  -1  -1 58.5500 2.63083   3
   6  -1  -1 55.6869 2.95867   7
  -6  -1   1 60.2217 2.93132   7
  -6  -1   1 57.1457 2.58505   3
   6  -1  -1 52.1352 2.87069   6
  -6  -1   1 64.6362 5.03903   6
  -6  -1   1 57.4885 2.94597   4
   6  -1  -1 56.6087 3.43585   5
  -6   1   1 57.0467 2.53737   3
  -6   1   1 56.0708 2.99777   6
   6   1  -1 58.2760 2.88217   4
   6   1  -1 57.6176 3.26977   5
   6   1  -1 49.5179 2.96668   6
  -6   1   1 57.5230 2.15503   4
  -6   1   1 58.6714 3.71969   5
   6   1  -1 56.9047 2.79540   3
  -5  -1   1 3.62158 0.79450   6
   5  -1  -1 4.44526 0.85671   6
  -5  -1   1 9.44633 1.64370   5
   5  -1  -1 5.34359 1.09203   5
  -5  -1   1 5.32901 0.98413   4
   5  -1  -1 7.56968 1.28049   7
  -5  -1   1 5.70096 0.91310   3
  -5  -1   1 5.57699 0.96387   7
   5  -1  -1 5.83758 0.86240   3
   5   1  -1 5.57976 1.03699   4
  -5   1   1 5.39837 1.16524   7
  -5   1   1 5.93225 1.19393   5
  -5   1   1 6.79208 0.95767   3
   5   1  -1 6.12719 0.96704   3
   5   1  -1 5.68213 1.01024   5
   5   1  -1 4.69827 1.14183   6
  -5   1   1 6.64810 0.64640   4
  -5   1   1 9.35057 1.35899   6
  -4  -1   1 1916.56 40.6550   3
   4  -1  -1 1927.33 42.1827   5
   4  -1  -1 1970.01 41.1563   6
   4  -1  -1 1981.12 40.6698   3
  -4  -1   1 1938.28 41.9346   5
  -4  -1   1 1935.67 41.3371   4
   4  -1  -1 1893.56 41.3869   7
  -4  -1   1 1896.23 40.7555   7
  -4  -1   1 1919.29 41.6533   6
  -4   1   1 1926.05 40.5778   3
   4   1  -1 1914.71 41.6551   5
   4   1  -1 1940.14 41.2445   4
  -4   1   1 1872.29 41.0620   6
   4   1  -1 1925.69 41.5241   6
  -4   1   1 1906.44 42.4077   5
  -4   1   1 1852.14 40.2611   4
  -4   1   1 1855.26 41.7298   7
   4   1  -1 1903.26 40.9013   3
  -3  -1   1 32.6577 1.46619   3
   3  -1  -1 31.1177 1.54864   6
  -3  -1   1 31.4324 1.72024   4
   3  -1  -1 31.9604 1.77112   7
  -3  -1   1 33.6756 1.87061   5
  -3  -1   1 29.5756 1.39000   7
   3  -1  -1 29.3771 1.39441   3
  -3   1   1 29.2413 1.94383   5
  -3   1   1 28.9283 1.80803   7
   3   1  -1 32.6605 1.79491   6
  -3   1   1 32.2241 1.57326   6
  -3   1   1 31.5999 1.42671   3
   3   1  -1 31.0756 1.69409   4
   3   1  -1 31.4156 1.52206   3
   2  -1  -1 158.925 4.03177   3
   2  -1  -1 159.349 4.55814   7
   2  -1  -1 152.551 4.04033   6
  -2  -1   1 153.953 4.43697   4
  -2  -1   1 156.619 4.06753   3
  -2  -1   1 153.604 4.40226   5
   2   1  -1 156.103 4.14937   3
  -2   1   1 156.657 4.00813   3
   2   1  -1 158.052 4.43082   5
  -2   1   1 155.470 4.04117   6
   2   1  -1 154.243 4.41813   4
  -2   1   1 153.362 4.60022   7
  -1  -1   1 701.552 15.1004   3
   1  -1  -1 719.704 14.6592   4
  -1   1   1 695.857 15.4852   7
   1   1  -1 667.366 15.2931   4
  -1   1   1 683.132 14.8506   6
  -1   1   1 700.511 14.6385   4
   0  -1  -1 828.488 17.8778   3
   0   1  -1 845.418 17.7885   7
   0   1  -1 808.743 17.8382   3
   0   1  -1 827.563 17.8638   4
   0   1   1 848.802 17.7949   4
   2  -1   1 2209.96 80.2339   2
   2  -1   1 2209.90 79.9579   1
  -2  -1  -1 2380.16 82.8708   2
  -2  -1  -1 2378.95 82.5354   1
  -2   1  -1 2156.23 80.4466   1
  -2   1  -1 2152.53 80.6689   2
  -3  -1  -1 11.7300 1.00137   3
   3  -1   1 10.5130 1.14710   5
   3  -1   1 10.6682 0.89624   3
  -3  -1  -1 10.2241 1.05261   5
  -3  -1  -1 10.1854 1.01403   4
  -3  -1  -1 9.37770 1.02372   6
   3  -1   1 11.5356 1.04997   7
  -3   1  -1 9.78165 0.96718   6
  -3   1  -1 8.97162 0.89137   3
   3   1   1 10.4537 1.02267   4
  -3   1  -1 10.8207 1.10371   7
   3   1   1 11.0575 1.04393   5
   3   1   1 10.3649 1.04502   6
  -4  -1  -1 1322.34 29.6550   6
  -4  -1  -1 1320.34 29.0517   7
   4  -1   1 1314.07 29.3399   6
   4  -1   1 1342.53 29.4016   7
   4  -1   1 1372.15 28.8871   3
  -4  -1  -1 1357.01 28.9787   3
  -4  -1  -1 1344.39 29.3462   4
   4  -1   1 1367.66 30.0142   5
  -4  -1  -1 1310.54 29.6175   5
   4   1   1 1325.13 29.1633   3
  -4   1  -1 1302.34 29.2730   6
  -4   1  -1 1334.57 28.9140   3
   4   1   1 1311.10 29.2178   4
  -4   1  -1 1322.80 30.1553   5
  -4   1  -1 1320.29 28.1532   4
   4   1   1 1278.34 29.4522   6
  -4   1  -1 1308.37 29.7072   7
   4   1   1 1326.92 29.5064   5
   5  -1   1 353.769 10.1897   5
  -5  -1  -1 357.012 9.19806   3
  -5  -1  -1 368.701 10.2030   5
   5  -1   1 361.036 9.62692   7
  -5  -1  -1 352.805 9.43860   7
   5  -1   1 356.914 9.70047   6
   5  -1   1 356.247 9.11365   3
  -5  -1  -1 347.643 9.52216   4
  -5   1  -1 350.083 10.0337   7
   5   1   1 343.976 9.41447   3
  -5   1  -1 367.140 9.25344   3
  -5   1  -1 357.876 8.48312   4
  -5   1  -1 351.172 10.4878   5
   5   1   1 349.030 9.80227   6
   5   1   1 355.820 9.84699   5
  -5   1  -1 351.722 9.65008   6
   5   1   1 342.861 9.39615   4
  -6  -1  -1 62.2767 3.12343   7
  -6  -1  -1 58.3439 2.83656   3
   6  -1   1 54.7044 3.09552   6
  -6  -1  -1 65.1091 3.64827   5
   6  -1   1 61.2678 3.16639   7
  -6  -1  -1 61.2003 3.11104   4
   6  -1   1 55.9393 2.75452   3
  -6   1  -1 61.1954 4.06510   6
   6   1   1 63.3028 3.94210   5
  -6   1  -1 61.2952 2.88743   3
   6   1   1 59.6521 2.98819   4
  -6   1  -1 64.2059 3.53203   7
  -6   1  -1 61.1963 2.41774   4
   6   1   1 60.0609 3.27857   6
  -6   1  -1 55.9349 3.64163   5
  -7  -1  -1 1084.94 24.9486   3
   7  -1   1 1093.97 26.5451   5
  -7  -1  -1 1113.68 26.4439   6
  -7  -1  -1 1092.33 25.5729   4
  -7  -1  -1 1064.29 26.7050   5
   7  -1   1 1099.48 25.0150   3
   7  -1   1 1102.94 25.9153   6
   7  -1   1 1097.26 25.5838   7
  -7  -1  -1 1108.80 25.7072   7
   7   1   1 1098.69 25.2925   4
  -7   1  -1 1106.19 24.1817   4
  -7   1  -1 1062.97 26.3859   7
  -7   1  -1 1042.09 27.0915   5
   7   1   1 1064.65 25.9563   6
  -7   1  -1 1085.34 25.9356   6
  -7   1  -1 1113.82 25.0060   3
   7   1   1 1070.94 25.4104   3
   7   1   1 1058.28 25.9890   5
  -8  -1  -1 118.377 5.28394   7
   8  -1   1 123.039 5.45285   6
   8  -1   1 122.637 5.79762   5
  -8  -1  -1 121.689 4.76886   3
   8  -1   1 120.953 4.88043   3
  -8  -1  -1 124.953 5.95825   4
  -8  -1  -1 120.829 6.07469   5
   8  -1   1 122.726 5.23036   7
  -8  -1  -1 118.592 5.67446   6
  -8   1  -1 123.749 4.84163   3
  -8   1  -1 126.307 6.39940   5
   8   1   1 123.915 5.03577   4
   8   1   1 116.980 5.45306   5
  -8   1  -1 119.650 4.26063   4
  -8   1  -1 123.800 5.50758   6
   8   1   1 128.357 5.24970   3
  -8   1  -1 118.509 5.84257   7
  -9  -1  -1 133.009 6.40738   6
  -9  -1  -1 134.210 5.27852   3
  -9  -1  -1 145.324 5.93688   4
  -9  -1  -1 138.092 6.09460   7
   9  -1   1 133.873 5.80083   7
   9  -1   1 131.866 5.45065   3
   9  -1   1 136.047 6.14613   6
  -9  -1  -1 138.295 6.93382   5
   9  -1   1 143.698 6.61776   5
  -9   1  -1 140.732 5.38687   3
   9   1   1 132.461 5.73484   3
   9   1   1 138.152 5.60527   4
  -9   1  -1 142.496 7.24521   5
  -9   1  -1 135.149 6.61989   7
   9   1   1 138.943 6.30482   5
   9   1   1 141.256 6.29811   6
  -9   1  -1 135.820 4.82646   4
  -9   1  -1 133.622 6.16146   6
 -10  -1  -1 0.87282 1.14224   7
  10  -1   1 2.77596 1.44842   6
  10  -1   1 1.99337 1.22412   5
 -10  -1  -1 1.09332 1.32774   5
 -10  -1  -1 -1.1304 0.68814   3
 -10  -1  -1 -0.6711 0.84230   6
  10  -1   1 0.18530 0.78355   7
  10  -1   1 0.11338 0.88710   3
 -10  -1  -1 0.72927 0.91530   4
 -10   1  -1 1.36029 0.96092   3
  10   1   1 0.83755 1.12576   6
  10   1   1 0.85977 0.94662   4
  10   1   1 1.43318 1.03109   3
 -10   1  -1 2.69813 1.71775   5
 -10   1  -1 -0.8716 0.79130   6
  10   1   1 1.50411 1.13789   5
 -10   1  -1 -0.1981 1.02584   7
 -10   1  -1 1.77070 0.74866   4
  11  -1   1 283.983 9.53207   3
 -11  -1  -1 280.905 8.98530   3
  11  -1   1 263.924 10.4894   5
  11  -1   1 275.250 10.2568   6
 -11  -1  -1 268.233 9.56216   4
 -11  -1  -1 280.943 11.5873   5
  11  -1   1 269.325 9.74875   7
 -11  -1  -1 280.382 10.4998   7
 -11  -1  -1 271.089 10.8343   6
 -11   1  -1 281.258 8.40247   4
 -11   1  -1 271.698 9.78660   3
  11   1   1 273.958 9.31611   4
 -11   1  -1 293.321 12.0802   5
  11   1   1 289.080 10.5211   6
  11   1   1 279.630 9.88555   3
 -11   1  -1 260.938 10.9413   7
 -11   1  -1 268.431 10.4275   6
  11   1   1 264.963 10.2602   5
 -12  -1  -1 82.9120 6.20630   5
  12  -1   1 74.6500 5.15662   6
 -12  -1  -1 71.2293 4.11662   3
 -12  -1  -1 79.3879 4.73463   4
 -12  -1  -1 81.1885 5.37837   7
 -12   1  -1 81.6436 4.37090   3
  12   1   1 83.1117 4.63858   4
 -12   1  -1 79.3061 6.22574   5
 -12   1  -1 72.5958 5.63475   7
  12   1   1 65.5960 4.91876   6
 -12   1  -1 79.7517 3.84606   4
 -13  -1  -1 26.0679 4.51816   5
 -13  -1  -1 26.2144 3.95261   7
 -13  -1  -1 26.0075 2.88901   4
  13  -1   1 29.9482 4.20970   6
 -13  -1  -1 21.9504 2.47554   3
 -13   1  -1 34.6700 5.21474   5
 -13   1  -1 22.3961 3.55773   7
 -13   1  -1 23.6792 2.54089   3
  13   1   1 27.0939 3.93958   6
  14  -1   1 130.260 7.38646   6
 -14  -1  -1 113.717 6.23604   4
 -14  -1  -1 139.209 7.90189   7
 -14  -1  -1 118.262 5.63499   3
 -14  -1  -1 144.310 8.95756   5
  14   1   1 129.230 7.48533   6
 -14   1  -1 118.507 7.92494   7
 -14   1  -1 126.003 5.31859   4
 -14   1  -1 122.610 5.62760   3
 -14   1  -1 135.814 8.84072   5
 -15  -1  -1 37.2806 4.25913   4
 -15  -1  -1 35.1820 4.73042   7
 -15  -1  -1 29.2269 4.63961   5
 -15  -1  -1 32.3972 3.00814   3
  15  -1   1 36.8843 6.79161   6
  15   1   1 35.0337 4.14109   6
 -15   1  -1 33.8120 2.65705   4
 -15   1  -1 36.2646 3.09182   3
 -15   1  -1 37.6982 5.90704   7
  16  -1   1 37.7065 4.33908   6
 -16  -1  -1 29.1934 5.32106   5
 -16  -1  -1 33.5765 5.52727   7
 -16  -1  -1 28.3387 3.80993   4
 -16  -1  -1 32.1756 2.97192   3
 -16   1  -1 30.5715 2.84192   3
 -16   1  -1 30.8294 4.98544   7
  16   1   1 29.7275 4.20373   6
 -16   1  -1 37.7088 3.24143   4
 -17  -1  -1 85.0457 7.04967   7
 -17  -1  -1 75.8397 7.36027   5
 -17  -1  -1 73.6429 3.99925   3
  17  -1   1 69.8646 6.01986   6
 -17   1  -1 70.4528 7.02137   7
  17   1   1 66.3499 6.06955   6
 -18  -1  -1 -3.5921 1.76176   7
 -18  -1  -1 4.69434 2.45471   5
  18  -1   1 1.69483 1.71024   6
  18   1   1 2.36930 1.83242   6
 -18   1  -1 -2.2177 2.04739   7
 -19  -1  -1 3.50997 3.06275   7
 -19  -1  -1 8.05606 3.32509   5
  19  -1   1 1.39551 2.25649   6
 -19   1  -1 2.68288 3.57595   7
  19   1   1 6.43198 2.54017   6
 -19  -2   1 17.8845 4.17993   7
  19  -2  -1 19.8085 5.07586   6
 -19  -2   1 21.8754 4.59295   5
  19   2  -1 29.9141 4.81709   6
 -18  -2   1 14.7674 3.44122   7
 -18  -2   1 13.5764 4.04562   5
  18  -2  -1 9.76674 3.04704   6
 -18   2   1 17.8566 4.71172   7
  18   2  -1 12.5969 3.09674   6
  17  -2  -1 30.5796 4.51765   6
 -17  -2   1 39.6886 6.85604   5
 -17  -2   1 35.7256 4.95730   7
  17   2  -1 34.3066 5.49784   6
 -17   2   1 27.1670 4.99692   7
 -16  -2   1 26.9251 4.76256   5
 -16  -2   1 22.6712 3.91858   7
  16  -2  -1 25.5487 3.97993   6
  16   2  -1 19.7258 3.59067   6
 -16   2   1 25.0772 4.76625   7
 -15  -2   1 1.22020 1.85377   5
 -15  -2   1 1.63970 2.00066   4
 -15  -2   1 3.14824 1.17877   3
 -15  -2   1 1.52150 1.81013   7
  15  -2  -1 2.69874 1.53958   6
 -15   2   1 0.81549 3.29881   7
  15   2  -1 1.80689 1.76032   6
  15   2  -1 2.02278 1.40287   4
  14  -2  -1 16.6361 3.31925   6
 -14  -2   1 15.2671 2.62972   4
 -14  -2   1 12.6810 2.92427   7
 -14  -2   1 14.3812 2.04777   3
 -14  -2   1 12.1621 3.12353   5
 -14   2   1 14.5235 3.43466   7
  14   2  -1 11.3870 2.58784   6
  14   2  -1 9.46517 2.21702   4
 -14   2   1 13.7874 1.81588   3
  13  -2  -1 39.9232 3.98944   6
 -13  -2   1 42.2676 4.78853   5
 -13  -2   1 42.5774 4.50442   4
 -13  -2   1 48.6599 3.20051   3
 -13  -2   1 49.1175 4.28085   7
  13   2  -1 40.7905 3.64623   4
  13   2  -1 45.6699 4.36661   6
 -13   2   1 51.3830 5.08285   7
 -13   2   1 39.9643 2.80629   3
 -12  -2   1 4.99989 1.71453   7
 -12  -2   1 8.54583 1.86363   4
 -12  -2   1 12.8273 3.34231   5
  12  -2  -1 5.99695 1.82609   6
  12  -2  -1 8.98448 1.73200   3
 -12  -2   1 8.02900 1.52408   3
  12   2  -1 10.8517 2.60679   6
 -12   2   1 8.70006 2.36859   7
  12   2  -1 8.99845 1.97499   4
 -12   2   1 8.58934 1.55751   3
 -12   2   1 4.86053 1.56451   6
  11  -2  -1 36.9790 3.16631   7
 -11  -2   1 30.0612 3.03682   7
 -11  -2   1 33.4753 3.87544   5
 -11  -2   1 34.4458 3.22123   4
  11  -2  -1 36.6535 3.77695   5
 -11  -2   1 34.0206 2.64046   3
  11  -2  -1 33.0397 3.01149   3
  11  -2  -1 42.5480 3.61136   6
  11   2  -1 30.6505 3.10226   3
  11   2  -1 34.8248 3.51874   6
  11   2  -1 30.1537 3.30851   5
 -11   2   1 38.6197 4.08021   7
  11   2  -1 37.5817 3.25616   4
 -11   2   1 28.7378 2.41699   3
  10  -2  -1 3.81096 1.19949   7
  10  -2  -1 2.93143 1.21307   6
  10  -2  -1 3.04843 1.11809   3
 -10  -2   1 1.82141 0.99544   3
 -10  -2   1 4.33839 1.88955   5
 -10  -2   1 5.46334 1.54489   4
 -10  -2   1 4.34061 1.43370   7
  10   2  -1 4.55442 1.73045   6
  10   2  -1 4.22098 1.35435   3
 -10   2   1 4.69457 1.21665   3
  10   2  -1 5.63082 1.61321   5
 -10   2   1 4.58854 1.83409   7
 -10   2   1 4.77091 1.53023   6
   9  -2  -1 0.56763 0.73503   3
  -9  -2   1 0.48639 0.80689   4
   9  -2  -1 0.28193 0.74569   7
  -9  -2   1 0.48093 1.03336   5
   9  -2  -1 -0.6343 0.92423   5
  -9  -2   1 1.10229 0.81894   3
  -9  -2   1 2.17909 1.05583   7
   9   2  -1 0.41153 0.66790   3
  -9   2   1 0.04824 0.85529   7
  -9   2   1 0.61126 0.71353   3
   9   2  -1 0.88115 0.93253   6
   9   2  -1 1.75431 0.97254   4
  -9   2   1 1.06169 0.87817   6
   9   2  -1 0.52328 0.80630   5
  -8  -2   1 48.9639 2.76031   3
  -8  -2   1 51.1776 3.07574   7
   8  -2  -1 50.8440 2.84456   3
  -8  -2   1 49.9561 3.36993   4
   8  -2  -1 48.9286 3.27362   7
   8  -2  -1 49.3367 3.26749   6
   8  -2  -1 51.9108 3.82508   5
   8   2  -1 46.4520 3.17291   4
  -8   2   1 50.8191 2.80066   3
   8   2  -1 52.1903 3.58467   5
  -8   2   1 45.9464 3.09850   6
   8   2  -1 48.9647 3.15648   3
  -7  -2   1 480.654 13.5118   4
   7  -2  -1 483.333 13.3809   7
  -7  -2   1 499.059 12.4214   3
  -7  -2   1 494.479 14.2471   5
   7  -2  -1 489.027 14.4210   5
  -7  -2   1 488.084 12.6705   7
   7  -2  -1 496.586 13.1969   6
   7  -2  -1 474.938 12.4233   3
   7   2  -1 501.016 13.8954   5
   7   2  -1 476.545 13.1975   4
  -7   2   1 501.779 13.1899   6
   7   2  -1 490.553 13.1060   3
  -7   2   1 438.071 13.9639   7
   7   2  -1 479.532 13.6173   6
  -7   2   1 494.534 12.3921   3
   6  -2  -1 574.314 13.9072   3
  -6  -2   1 568.047 15.0513   4
   6  -2  -1 559.356 14.4203   6
  -6  -2   1 575.273 13.8634   3
  -6  -2   1 568.656 13.9181   7
  -6  -2   1 575.046 15.3482   5
   6  -2  -1 581.655 15.8217   5
   6  -2  -1 544.004 14.7574   7
  -6   2   1 562.008 15.5584   7
  -6   2   1 558.486 14.3319   6
  -6   2   1 553.430 13.7467   3
   6   2  -1 588.410 15.1455   5
   6   2  -1 560.778 14.4647   3
   6   2  -1 553.535 14.6655   4
   6   2  -1 569.686 15.0110   6
  -5  -2   1 124.206 4.94156   5
   5  -2  -1 116.810 4.33916   6
   5  -2  -1 113.399 4.02738   3
  -5  -2   1 114.120 4.06816   3
   5  -2  -1 119.726 5.21751   5
   5  -2  -1 111.397 4.61968   7
  -5  -2   1 117.752 3.99806   7
  -5  -2   1 120.961 4.78917   4
  -5   2   1 115.765 5.08212   7
  -5   2   1 123.346 4.13131   3
   5   2  -1 109.129 4.65530   6
   5   2  -1 122.199 4.72294   4
   5   2  -1 117.103 4.38831   3
  -5   2   1 116.384 4.28533   6
   5   2  -1 115.769 4.82156   5
  -4  -2   1 1887.22 43.0045   5
   4  -2  -1 1967.97 43.2596   7
  -4  -2   1 1941.03 42.2142   3
  -4  -2   1 1964.63 43.1925   4
   4  -2  -1 2027.22 43.8902   5
   4  -2  -1 1986.54 42.2604   3
   4  -2  -1 1963.62 42.4554   6
   4   2  -1 2031.36 43.1931   4
   4   2  -1 1910.29 43.0584   5
   4   2  -1 1936.53 43.1833   6
  -4   2   1 2029.90 42.2711   3
   4   2  -1 1977.19 42.7007   3
  -4   2   1 2022.29 43.8255   7
  -4   2   1 1945.38 42.3294   6
  -3  -2   1 469.946 11.3264   3
   3  -2  -1 469.282 12.0491   7
   3  -2  -1 493.323 11.3988   6
   3  -2  -1 454.201 11.2217   3
  -3  -2   1 476.349 12.0074   4
  -3  -2   1 477.563 11.8009   5
   3   2  -1 465.609 11.9110   4
  -3   2   1 471.290 10.1006   4
   3   2  -1 465.472 11.5697   3
  -3   2   1 465.931 11.2385   3
  -3   2   1 464.148 11.1700   6
   2  -2  -1 198.336 6.12664   7
   2  -2  -1 204.177 5.63587   3
   2  -2  -1 205.170 5.00393   4
  -2  -2   1 202.639 6.05309   4
  -2   2   1 209.659 5.00212   4
   2   2  -1 206.472 5.90034   3
  -2   2   1 208.157 5.65456   3
  -2   2   1 206.475 5.48715   6
   2   2  -1 210.477 6.11944   4
  -1  -2   1 913.738 20.7710   4
   1  -2  -1 925.180 20.4731   3
   1  -2  -1 939.486 20.1263   4
  -1  -2   1 943.055 20.3520   7
   1  -2  -1 917.410 20.9406   7
  -1  -2   1 905.688 20.5396   3
   1   2  -1 920.523 20.7846   4
   1   2  -1 909.689 20.7035   3
  -1   2   1 910.390 21.0304   7
  -1   2   1 970.796 20.1473   4
   0  -2   1 1.96175 0.54779   4
   0  -2   1 1.64598 0.50673   3
   0  -2   1 1.24701 0.49396   3
   0  -2   1 1.03106 0.49549   7
   0  -2  -1 1.14766 0.47918   3
   0  -2  -1 1.14378 0.55162   7
   0  -2  -1 1.40158 0.48031   4
   0   2  -1 0.36224 0.32816   4
   0   2  -1 0.03610 0.32374   7
   0   2   1 0.36412 0.36538   3
   0   2   1 0.06614 0.34079   7
   0   2  -1 0.28922 0.35126   3
   0   2   1 1.35423 0.43656   4
  -1  -2  -1 482.276 11.7025   3
   1  -2   1 486.921 11.5189   3
   1  -2   1 505.466 11.7942   7
   1  -2   1 502.499 11.2635   4
  -1  -2  -1 474.445 11.7014   4
  -1   2  -1 496.315 11.8823   7
  -1   2  -1 486.892 11.2615   4
   1   2   1 481.342 11.6991   3
  -1   2  -1 491.441 11.6344   3
   1   2   1 466.636 11.6501   4
   2  -2   1 10.2798 0.99042   3
  -2  -2  -1 8.54039 0.99871   3
   2  -2   1 10.2155 0.76676   4
   2  -2   1 8.50831 1.01892   7
  -2   2  -1 10.3757 0.98710   6
   2   2   1 9.60896 1.05540   3
  -2   2  -1 10.4034 0.80350   4
  -2   2  -1 10.0295 1.04638   3
  -3  -2  -1 17.3559 1.38110   3
   3  -2   1 18.6878 1.35036   3
   3  -2   1 17.2740 1.48945   7
  -3  -2  -1 18.6148 1.47750   5
   3  -2   1 17.0523 1.39040   6
  -3  -2  -1 15.4534 1.42954   4
  -3   2  -1 16.5464 1.38062   3
  -3   2  -1 16.5903 1.57158   7
   3   2   1 17.1343 1.42061   3
  -3   2  -1 16.7277 0.93447   4
  -3   2  -1 14.5654 1.25210   6
   3   2   1 16.5909 1.48561   6
   4  -2   1 146.516 5.42519   5
  -4  -2  -1 139.984 4.64350   3
  -4  -2  -1 133.569 5.01454   4
   4  -2   1 144.938 5.08519   7
   4  -2   1 138.885 4.81481   6
   4  -2   1 133.171 4.48290   3
   4   2   1 137.374 4.82182   3
  -4   2  -1 139.206 5.35476   7
  -4   2  -1 140.443 4.66587   3
  -4   2  -1 141.638 4.72224   6
   4   2   1 137.367 4.96206   4
   5  -2   1 54.7913 2.91374   6
   5  -2   1 49.9179 2.55091   3
   5  -2   1 53.8282 3.28773   5
  -5  -2  -1 53.2835 3.05860   5
  -5  -2  -1 51.1672 3.00857   4
  -5  -2  -1 50.5441 2.65398   3
   5   2   1 51.5023 2.96373   5
   5   2   1 53.9486 3.00412   4
  -5   2  -1 51.6633 2.66175   3
  -5   2  -1 53.3045 1.85045   4
  -5   2  -1 52.9227 2.80685   6
  -5   2  -1 50.6295 3.22095   7
   5   2   1 54.9896 3.09654   6
  -6  -2  -1 52.1479 2.78431   3
  -6  -2  -1 49.4200 3.27302   6
  -6  -2  -1 45.3005 3.04085   5
   6  -2   1 51.5033 3.41007   5
   6  -2   1 46.5778 2.59424   3
   6  -2   1 50.2545 3.00291   7
   6  -2   1 43.7110 2.83034   6
  -6  -2  -1 47.3096 2.67547   7
  -6   2  -1 53.5141 3.50365   7
   6   2   1 45.1715 2.79846   3
  -6   2  -1 49.2186 1.83447   4
  -6   2  -1 51.1659 2.95657   6
   6   2   1 51.6627 3.06554   4
  -6   2  -1 51.4537 2.79248   3
   6   2   1 46.5939 3.06198   6
   6   2   1 45.3571 2.96726   5
  -7  -2  -1 195.334 7.18737   4
  -7  -2  -1 200.753 6.55840   3
   7  -2   1 186.508 6.97835   7
   7  -2   1 195.462 6.46920   3
   7  -2   1 202.801 7.78177   5
   7  -2   1 203.643 7.15171   6
  -7  -2  -1 195.479 7.56063   5
  -7  -2  -1 202.259 6.76023   7
  -7   2  -1 202.067 5.26152   4
   7   2   1 193.777 7.01238   4
   7   2   1 208.237 7.42402   5
  -7   2  -1 198.921 6.60514   3
  -7   2  -1 205.416 7.09330   6
  -7   2  -1 206.133 7.97742   7
   7   2   1 198.765 7.02896   3
   7   2   1 203.120 7.42509   6
  -8  -2  -1 153.638 5.90776   7
  -8  -2  -1 140.786 6.73399   5
   8  -2   1 139.947 5.42891   3
  -8  -2  -1 148.615 5.52580   3
   8  -2   1 141.796 6.04229   6
  -8  -2  -1 152.001 6.31668   4
  -8  -2  -1 138.866 6.55016   6
   8  -2   1 159.672 6.89510   5
   8  -2   1 148.053 6.04434   7
   8   2   1 143.000 6.29071   6
  -8   2  -1 146.795 5.56894   3
   8   2   1 136.429 6.13715   5
   8   2   1 138.522 5.85162   4
   8   2   1 139.614 5.92284   3
  -8   2  -1 149.984 6.13013   6
  -8   2  -1 149.343 4.30586   4
  -9  -2  -1 101.915 4.57043   3
   9  -2   1 103.959 5.30379   6
  -9  -2  -1 99.9393 5.15962   4
  -9  -2  -1 107.303 5.92355   6
   9  -2   1 100.754 5.03708   7
   9  -2   1 106.743 5.78440   5
  -9  -2  -1 103.384 5.87430   5
  -9  -2  -1 103.961 5.03368   7
   9  -2   1 104.382 4.67190   3
  -9   2  -1 104.603 4.67200   3
   9   2   1 106.050 5.51163   6
   9   2   1 103.511 5.43749   5
   9   2   1 104.221 5.08042   4
  -9   2  -1 94.3970 5.03131   6
   9   2   1 95.0462 5.03585   3
  -9   2  -1 108.395 3.56006   4
 -10  -2  -1 201.715 7.96745   7
  10  -2   1 204.786 8.99834   5
 -10  -2  -1 195.098 8.97344   5
 -10  -2  -1 206.785 8.22202   4
 -10  -2  -1 198.163 7.16926   3
  10  -2   1 190.373 7.36009   3
 -10  -2  -1 209.411 9.14948   6
  10  -2   1 213.516 8.37540   6
  10  -2   1 203.280 9.14366   7
 -10   2  -1 205.081 7.33798   3
  10   2   1 209.358 8.54613   6
  10   2   1 212.691 9.64287   3
  10   2   1 202.875 7.88145   4
 -10   2  -1 208.037 5.90980   4
 -10   2  -1 203.380 9.29813   7
  10   2   1 201.052 10.4634   5
 -10   2  -1 214.040 8.39241   6
  11  -2   1 0.88569 1.13411   7
  11  -2   1 2.36539 1.23413   5
 -11  -2  -1 3.71612 1.80457   5
 -11  -2  -1 2.63061 1.23736   3
 -11  -2  -1 2.08296 1.29918   4
  11  -2   1 2.08471 1.23407   6
 -11  -2  -1 1.61030 1.28930   7
  11  -2   1 3.23643 1.35844   3
  11   2   1 1.37940 1.20901   6
 -11   2  -1 1.82506 1.67893   7
 -11   2  -1 1.71159 1.39042   6
  11   2   1 1.40342 1.13913   5
 -11   2  -1 2.11572 0.73912   4
  11   2   1 3.35981 1.41322   4
  11   2   1 0.98573 1.06819   3
 -12  -2  -1 68.3001 4.88209   7
 -12  -2  -1 67.7471 5.68610   5
 -12  -2  -1 72.5252 4.14833   3
 -12  -2  -1 72.0949 4.85538   4
  12  -2   1 70.4855 5.02087   6
  12   2   1 76.4112 5.30603   6
 -12   2  -1 71.1837 4.14326   3
 -12   2  -1 74.1467 5.87500   7
  12   2   1 67.5460 4.54473   4
 -12   2  -1 65.0127 2.87485   4
 -13  -2  -1 207.277 7.80531   3
 -13  -2  -1 222.055 9.62805   7
  13  -2   1 206.101 9.36827   6
 -13  -2  -1 222.071 10.9585   5
 -13  -2  -1 205.046 9.08029   4
  13   2   1 216.489 8.79553   4
 -13   2  -1 214.842 7.93535   3
 -13   2  -1 219.713 10.8976   7
 -13   2  -1 202.292 6.06218   4
  13   2   1 221.169 9.80110   6
 -14  -2  -1 24.9531 2.79615   3
 -14  -2  -1 30.3019 4.40638   7
  14  -2   1 23.1242 3.68616   6
 -14  -2  -1 29.6147 3.46774   4
 -14  -2  -1 32.6220 5.37443   5
 -14   2  -1 27.8625 4.61287   7
 -14   2  -1 27.1084 2.79639   3
  14   2   1 28.3649 4.10829   6
 -15  -2  -1 3.02541 2.34933   5
 -15  -2  -1 3.81526 1.47599   3
 -15  -2  -1 0.59441 1.66858   7
  15  -2   1 2.17461 2.01091   6
 -15   2  -1 0.58901 1.17854   3
 -15   2  -1 1.17614 1.77778   7
  15   2   1 1.46678 1.80956   6
  16  -2   1 14.8411 3.45103   6
 -16  -2  -1 15.7587 2.32978   3
 -16  -2  -1 15.5884 3.80353   5
 -16  -2  -1 17.0259 4.11746   7
  16   2   1 8.31020 2.32202   6
 -16   2  -1 15.3322 2.14501   3
 -16   2  -1 12.5950 3.61476   7
  17  -2   1 6.03734 2.31600   6
 -17  -2  -1 5.86932 1.64269   3
 -17  -2  -1 7.99748 2.92895   5
 -17  -2  -1 6.40957 2.61610   7
 -17   2  -1 7.67023 3.05894   7
  17   2   1 3.89071 2.14633   6
 -18  -2  -1 1.60905 2.05047   7
 -18  -2  -1 0.27191 1.89088   5
  18  -2   1 1.63296 1.87476   6
 -18   2  -1 2.49467 2.23576   7
  18   2   1 -0.2271 1.73746   6
 -18  -3   1 14.2743 3.26894   7
  18  -3  -1 14.2150 3.47821   6
 -18  -3   1 15.3713 6.04147   5
  18   3  -1 13.8807 3.85948   6
 -18   3   1 8.13205 4.09027   7
  17  -3  -1 47.0644 5.08665   6
 -17  -3   1 46.2351 5.11256   7
 -17  -3   1 50.2240 7.80486   5
  17   3  -1 44.8494 5.33114   6
 -17   3   1 43.4026 6.87134   7
 -16  -3   1 11.4795 2.96765   7
 -16  -3   1 10.5286 3.54843   5
 -16  -3   1 11.1427 2.49314   3
 -16  -3   1 15.2229 2.01465   3
  16  -3  -1 12.3455 2.84026   6
 -16   3   1 12.2165 3.75074   7
  16   3  -1 22.1260 3.58670   4
  16   3  -1 13.4988 2.98436   6
 -15  -3   1 96.8810 6.41392   7
  15  -3  -1 101.725 6.71240   6
 -15  -3   1 103.664 8.13698   5
 -15  -3   1 98.9609 4.83565   3
 -15   3   1 124.005 8.96984   7
  15   3  -1 106.324 6.50161   4
  15   3  -1 122.575 7.61899   6
 -14  -3   1 36.0345 3.85310   7
 -14  -3   1 32.7399 5.75765   5
  14  -3  -1 35.7394 3.96949   6
 -14  -3   1 38.1224 3.03451   3
  14   3  -1 26.6911 5.06665   6
 -14   3   1 37.7602 5.71542   7
 -14   3   1 39.6796 2.65000   3
  14   3  -1 35.5541 3.89225   4
  13  -3  -1 30.5509 3.56330   6
 -13  -3   1 32.0978 2.77973   3
 -13  -3   1 29.4054 3.50729   4
 -13  -3   1 29.2760 4.39001   5
 -13  -3   1 28.7331 3.24218   7
  13   3  -1 25.2893 3.84069   6
  13   3  -1 25.6882 3.16413   4
 -13   3   1 27.3939 2.43007   3
 -13   3   1 31.4353 4.50245   7
 -12  -3   1 17.7217 2.96559   4
 -12  -3   1 17.9057 2.69104   7
 -12  -3   1 22.2841 4.18146   5
 -12  -3   1 19.5420 2.23197   3
  12  -3  -1 21.6148 3.31740   6
 -12   3   1 14.1790 3.35814   7
 -12   3   1 17.6091 2.21077   3
  12   3  -1 18.6525 2.90992   4
  12   3  -1 15.6790 2.73687   6
 -12   3   1 20.9259 3.13880   6
 -11  -3   1 1.72738 1.13396   3
 -11  -3   1 1.74180 1.18268   7
 -11  -3   1 2.61970 1.24369   4
 -11  -3   1 3.30366 1.84939   5
  11  -3  -1 1.87471 1.09132   3
  11  -3  -1 3.72198 1.57534   6
  11   3  -1 -1.4414 0.98323   3
 -11   3   1 5.14479 2.09257   7
  11   3  -1 2.16954 1.36273   4
 -11   3   1 3.01548 1.10767   3
  11   3  -1 2.23563 1.48320   6
 -11   3   1 0.57545 1.02212   6
  10  -3  -1 -0.1452 0.69628   3
 -10  -3   1 -0.0020 0.95761   5
  10  -3  -1 -1.0397 0.89831   6
 -10  -3   1 0.25506 0.80803   4
  10  -3  -1 -1.1752 0.66122   7
 -10  -3   1 0.12225 0.95001   3
 -10  -3   1 0.25018 0.82084   7
  10   3  -1 0.73311 0.85461   3
 -10   3   1 0.14422 0.74261   3
  10   3  -1 -0.7177 0.89687   5
 -10   3   1 -0.0536 0.98271   6
  10   3  -1 -0.5388 0.86985   4
  10   3  -1 0.28617 0.95744   6
 -10   3   1 -1.4603 0.84172   7
  -9  -3   1 6.99381 1.79675   4
   9  -3  -1 6.48590 1.62715   6
   9  -3  -1 13.3287 2.66991   5
  -9  -3   1 6.51529 1.75601   5
   9  -3  -1 6.03300 1.39121   7
  -9  -3   1 8.96401 1.77645   7
  -9  -3   1 8.50947 1.54543   3
   9  -3  -1 5.90056 1.28589   3
   9   3  -1 4.78948 1.49929   5
   9   3  -1 9.52248 2.19826   4
   9   3  -1 3.51257 1.23248   3
   9   3  -1 10.5729 2.34478   6
  -9   3   1 7.08850 1.36761   3
  -9   3   1 9.74674 1.94646   6
  -9   3   1 7.43920 2.00443   7
   8  -3  -1 38.9397 3.03838   7
  -8  -3   1 35.5641 2.52500   7
  -8  -3   1 34.5523 2.48509   3
  -8  -3   1 39.9955 3.21187   4
   8  -3  -1 36.0876 2.52240   3
   8  -3  -1 34.9456 3.32476   5
  -8  -3   1 36.8736 3.35877   5
   8  -3  -1 34.3923 2.84979   6
  -8   3   1 33.9028 2.72882   6
   8   3  -1 35.7127 2.93579   3
  -8   3   1 35.4185 3.53950   7
  -8   3   1 36.4866 2.54731   3
   8   3  -1 40.4699 3.94531   4
   8   3  -1 35.5787 3.14327   5
  -7  -3   1 50.0459 2.87915   3
   7  -3  -1 51.4986 3.41813   7
   7  -3  -1 47.1250 3.68868   5
   7  -3  -1 49.5057 2.87362   3
  -7  -3   1 48.6232 3.44670   4
   7  -3  -1 51.2146 3.21334   6
  -7  -3   1 50.1284 2.78394   7
  -7   3   1 56.1303 3.00383   3
   7   3  -1 51.5338 3.30567   3
   7   3  -1 49.8324 3.42243   4
   7   3  -1 49.1991 4.15622   6
  -7   3   1 51.0610 3.06215   6
   6  -3  -1 91.3444 3.90244   3
   6  -3  -1 88.8225 4.45618   7
  -6  -3   1 89.2320 4.56312   4
   6  -3  -1 91.4436 4.12976   6
  -6  -3   1 86.6636 4.49471   5
  -6  -3   1 88.4043 3.85467   3
   6  -3  -1 93.3772 4.97215   5
  -6   3   1 87.4576 3.84076   3
   6   3  -1 83.6307 4.14968   3
   6   3  -1 83.7020 4.39519   4
   6   3  -1 90.8660 4.62441   6
   5  -3  -1 17.6974 2.76590   3
  -5  -3   1 18.0360 1.97335   4
   5  -3  -1 20.5183 1.83181   6
  -5  -3   1 19.7496 1.99125   5
  -5  -3   1 18.8537 1.71987   3
   5  -3  -1 19.3813 1.98483   7
   5  -3  -1 19.6511 2.19470   5
   5   3  -1 17.5530 1.97768   6
   5   3  -1 21.9516 2.10343   4
  -5   3   1 25.0752 2.49584   7
   5   3  -1 17.1896 1.79974   3
  -5   3   1 19.4178 1.67652   6
  -5   3   1 18.1339 1.69971   3
   4  -3  -1 25.6641 1.82457   3
  -4  -3   1 26.5947 2.66516   4
  -4  -3   1 23.5222 2.01095   5
  -4  -3   1 25.1618 1.91851   3
   4   3  -1 23.7755 2.13530   4
  -4   3   1 25.4014 1.15402   4
  -4   3   1 28.4732 1.85489   6
  -4   3   1 27.0236 1.92580   3
   4   3  -1 27.0894 2.10664   3
  -4   3   1 29.1362 2.52875   7
   3  -3  -1 3.36121 0.60258   4
   3  -3  -1 3.56521 0.79330   3
  -3  -3   1 3.66583 0.95695   4
  -3  -3   1 3.50503 0.94151   3
   3  -3  -1 5.33283 1.25871   7
  -3   3   1 3.58943 0.57936   4
   3   3  -1 2.21793 0.79127   4
   3   3  -1 2.60237 0.81029   3
  -3   3   1 2.55667 0.78719   3
  -3   3   1 2.86978 0.72538   6
  -3   3   1 5.78328 1.37531   7
  -2  -3   1 449.083 11.8562   4
  -2  -3   1 442.292 11.5159   3
   2  -3  -1 462.789 10.6901   4
   2  -3  -1 431.483 11.8702   7
  -2  -3   1 449.483 11.1466   7
   2  -3  -1 438.536 11.2888   3
  -2   3   1 447.308 12.2192   7
  -2   3   1 457.575 10.6699   4
   2   3  -1 431.567 11.5937   3
  -1  -3   1 839.344 19.8000   3
  -1  -3   1 855.139 20.0223   4
  -1  -3   1 847.968 19.6385   7
   1  -3  -1 856.129 20.0238   3
   1  -3  -1 842.428 20.2232   7
  -1  -3   1 855.382 20.0033   3
   1  -3  -1 890.088 19.4501   4
   1  -3  -1 851.678 19.7523   3
   1   3  -1 878.292 20.1132   3
  -1   3   1 848.314 20.3822   7
  -1   3   1 831.965 19.2978   4
   0  -3   1 37.8851 2.19820   7
   0  -3  -1 38.8870 2.32658   3
   0  -3  -1 42.2017 2.23268   4
   0  -3  -1 39.1416 2.35215   7
   0  -3   1 35.5600 2.10845   4
   0  -3   1 44.3106 2.47920   3
   0  -3   1 39.4151 2.21523   3
   0   3  -1 39.2384 2.21203   4
   0   3  -1 43.4522 2.36391   7
   0   3   1 40.0791 2.18944   4
   0   3   1 36.5036 2.20189   3
   0   3   1 41.4075 2.42023   7
   1  -3   1 578.861 14.2719   3
   1  -3   1 588.663 14.5321   7
   1  -3   1 588.644 13.9894   4
  -1  -3  -1 592.947 14.5314   4
  -1  -3  -1 583.693 14.5124   7
  -1   3  -1 606.265 14.5205   3
   1   3   1 584.456 14.5686   3
   1   3   1 587.896 14.5028   4
  -1   3  -1 578.988 14.0313   4
  -1   3  -1 609.233 14.8422   7
   2  -3   1 6.21521 1.06922   3
  -2  -3  -1 6.62439 1.15953   3
  -2  -3  -1 5.39654 0.97418   4
   2  -3   1 7.33452 0.88677   4
   2  -3   1 8.46018 1.40523   7
  -2   3  -1 7.00329 1.11252   3
  -2   3  -1 7.47306 1.02314   4
   2   3   1 7.18387 1.30285   4
  -2   3  -1 8.28173 1.48568   7
   2   3   1 7.17102 1.29696   3
   3  -3   1 655.182 15.7566   3
  -3  -3  -1 657.758 15.9701   3
  -3  -3  -1 617.645 16.2569   4
   3  -3   1 646.004 16.3208   7
  -3   3  -1 668.596 15.9512   3
  -3   3  -1 655.145 14.8430   4
   3   3   1 645.280 16.3402   4
  -3   3  -1 652.471 16.7824   7
  -3   3  -1 662.822 15.6828   6
   3   3   1 649.478 16.2162   3
  -4  -3  -1 28.2225 2.16366   5
  -4  -3  -1 29.1027 2.12886   3
   4  -3   1 27.4083 1.97087   3
   4  -3   1 24.6846 2.50232   7
  -4   3  -1 29.7366 1.47535   4
   4   3   1 26.9350 2.22506   4
  -4   3  -1 27.1542 2.45454   7
  -4   3  -1 27.6887 1.95145   6
  -4   3  -1 29.6533 2.14880   3
   5  -3   1 458.914 12.7078   7
   5  -3   1 441.820 13.0611   5
  -5  -3  -1 476.079 12.6904   5
   5  -3   1 466.364 12.4319   6
   5  -3   1 457.787 11.9546   3
  -5  -3  -1 454.307 12.8665   4
  -5  -3  -1 456.667 12.0310   3
   5   3   1 450.049 12.7749   6
  -5   3  -1 440.522 12.0231   3
  -5   3  -1 446.901 13.3594   7
   5   3   1 466.587 12.7842   4
  -5   3  -1 448.249 12.9478   6
  -5   3  -1 456.832 10.3684   4
   5   3   1 434.640 12.4253   3
   6  -3   1 12.4471 2.09419   7
  -6  -3  -1 6.89208 1.42152   4
  -6  -3  -1 7.83227 1.37124   3
  -6  -3  -1 7.84184 1.35354   5
   6  -3   1 6.26765 1.55490   5
   6  -3   1 8.27697 1.52638   6
   6  -3   1 8.45891 1.35550   3
  -6   3  -1 10.4717 1.57820   6
  -6   3  -1 10.4568 0.78085   4
   6   3   1 9.72427 1.87187   6
  -6   3  -1 7.80045 1.75689   7
  -6   3  -1 10.9649 1.67931   3
   6   3   1 8.83302 1.79207   4
   6   3   1 10.2692 1.63765   3
  -7  -3  -1 215.942 7.18189   3
   7  -3   1 224.561 7.84164   6
   7  -3   1 210.442 7.08001   3
  -7  -3  -1 211.173 9.15250   5
   7  -3   1 206.707 7.72028   7
   7  -3   1 227.603 8.65962   5
  -7  -3  -1 217.159 7.08984   7
  -7  -3  -1 221.930 8.18492   4
   7   3   1 205.349 7.82260   4
   7   3   1 219.014 8.11284   6
  -7   3  -1 215.006 8.76324   7
  -7   3  -1 216.765 7.27949   3
  -7   3  -1 221.923 7.52993   6
   7   3   1 207.677 7.73804   3
   8  -3   1 104.932 4.58241   3
  -8  -3  -1 98.3583 4.52482   3
   8  -3   1 97.1120 5.54907   5
  -8  -3  -1 99.7641 4.55479   7
  -8  -3  -1 93.1435 5.13689   4
  -8  -3  -1 98.2269 5.38603   5
   8  -3   1 93.3824 4.89950   7
  -8   3  -1 98.2518 4.82515   6
   8   3   1 92.6809 4.91757   3
   8   3   1 101.220 5.35090   6
  -8   3  -1 99.8877 4.60498   3
   8   3   1 104.886 5.42003   4
  -9  -3  -1 674.703 17.4729   7
   9  -3   1 675.747 19.4511   5
  -9  -3  -1 659.367 17.0878   3
  -9  -3  -1 656.504 19.1444   5
   9  -3   1 630.553 17.1579   3
  -9  -3  -1 646.513 18.6732   4
   9  -3   1 651.610 19.6868   7
   9  -3   1 670.907 18.3233   6
  -9   3  -1 651.136 17.9900   6
   9   3   1 682.393 18.8689   6
  -9   3  -1 666.159 19.9956   7
  -9   3  -1 685.023 17.4128   3
   9   3   1 653.950 18.7741   5
   9   3   1 687.192 18.4512   4
   9   3   1 631.845 18.2294   3
 -10  -3  -1 480.962 13.4130   3
  10  -3   1 476.172 14.6991   6
 -10  -3  -1 460.552 14.9257   4
 -10  -3  -1 486.209 13.9890   7
  10  -3   1 447.711 13.5614   3
 -10  -3  -1 480.292 15.7244   5
  10  -3   1 472.200 14.5089   7
  10  -3   1 472.374 15.5883   5
 -10   3  -1 488.244 16.5416   7
  10   3   1 464.404 15.0531   5
  10   3   1 452.280 14.6046   3
  10   3   1 497.841 15.3069   6
  10   3   1 477.483 14.5291   4
 -10   3  -1 489.992 14.5953   6
  11  -3   1 603.353 20.7559   5
 -11  -3  -1 600.995 16.2061   3
  11  -3   1 557.570 16.4442   3
 -11  -3  -1 611.172 17.2372   7
 -11  -3  -1 600.376 19.1128   5
  11  -3   1 621.006 18.0697   6
  11   3   1 581.934 17.4721   4
 -11   3  -1 609.078 19.9271   7
 -11   3  -1 599.006 17.7189   6
 -11   3  -1 598.653 16.3760   3
  11   3   1 611.096 18.3372   6
 -12  -3  -1 125.073 5.69487   3
 -12  -3  -1 133.376 6.65807   7
 -12  -3  -1 117.612 6.78631   4
 -12  -3  -1 132.217 7.87050   5
  12  -3   1 124.821 6.89731   6
  12   3   1 119.101 6.48967   4
  12   3   1 119.692 6.94985   6
 -12   3  -1 134.829 5.94561   3
 -12   3  -1 127.972 8.14864   7
 -13  -3  -1 166.209 9.41277   5
  13  -3   1 159.929 8.22181   6
 -13  -3  -1 171.218 6.89958   3
 -13  -3  -1 163.154 7.87836   7
 -13   3  -1 154.435 9.45048   7
  13   3   1 159.107 7.74403   4
  13   3   1 157.435 8.36857   6
 -13   3  -1 163.344 6.79224   3
 -14  -3  -1 57.0343 3.94521   3
 -14  -3  -1 59.3167 4.90881   7
  14  -3   1 58.5924 5.11087   6
  14   3   1 55.5756 4.74888   4
 -14   3  -1 57.7046 3.93375   3
  14   3   1 55.2521 5.17947   6
 -15  -3  -1 16.8740 4.23929   5
 -15  -3  -1 16.2421 2.39332   3
  15  -3   1 8.99962 2.49131   6
 -15  -3  -1 13.4521 2.90272   7
 -15   3  -1 13.9914 3.88477   7
  15   3   1 11.2836 2.64957   4
 -15   3  -1 14.5316 2.21416   3
  15   3   1 17.5945 3.73347   6
  16  -3   1 9.73568 2.86186   6
 -16  -3  -1 13.5775 2.19144   3
 -16  -3  -1 12.6427 2.89993   7
 -16  -3  -1 13.3784 3.67085   5
 -16   3  -1 13.1194 3.92849   7
  16   3   1 14.0382 3.64910   6
 -17  -3  -1 2.48062 1.87435   7
 -17  -3  -1 0.02806 1.32152   3
  17  -3   1 1.73664 1.64255   6
 -17  -3  -1 0.99700 2.27373   5
 -17   3  -1 0.48561 2.43898   7
  17   3   1 1.94740 2.06429   6
 -18  -3  -1 41.3561 5.12056   3
 -18  -3  -1 58.0726 9.01102   5
 -18  -3  -1 59.8393 5.97707   7
  18  -3   1 57.0201 5.94885   6
 -18   3  -1 47.2319 6.86419   7
  18   3   1 67.9190 7.71935   6
 -18  -4   1 63.2794 7.28095   5
  18  -4  -1 51.3071 5.45335   6
 -18  -4   1 53.5751 5.55353   7
 -18   4   1 31.7247 8.45450   7
  18   4  -1 53.4230 6.10326   6
 -17  -4   1 11.3462 3.19766   7
  17  -4  -1 5.45011 2.32788   6
 -17  -4   1 9.12473 1.76859   3
 -17  -4   1 11.5282 3.77919   5
 -17   4   1 9.58276 3.60203   7
  17   4  -1 9.34378 2.57590   4
  17   4  -1 6.39602 2.68718   6
 -16  -4   1 64.6725 6.90700   5
 -16  -4   1 62.8605 5.58246   7
  16  -4  -1 68.9296 5.96521   6
 -16  -4   1 67.8570 3.96625   3
  16   4  -1 69.2536 6.36612   6
 -16   4   1 58.2978 7.04634   7
  16   4  -1 75.3584 5.88559   4
 -15  -4   1 34.2869 3.43378   3
 -15  -4   1 23.9185 4.84701   5
 -15  -4   1 23.4289 2.74897   3
 -15  -4   1 29.4565 3.93866   7
 -15   4   1 28.0955 5.27774   7
  15   4  -1 36.8753 5.24457   6
  15   4  -1 35.2159 4.12309   4
 -14  -4   1 0.24608 1.31588   7
 -14  -4   1 2.65538 2.32281   5
 -14  -4   1 3.33128 1.30347   3
  14  -4  -1 3.11558 1.48816   6
 -14   4   1 0.94614 1.62355   7
  14   4  -1 0.11929 1.49533   6
  14   4  -1 -1.1283 1.22725   4
  13  -4  -1 -0.0841 1.24929   6
 -13  -4   1 0.45402 1.04835   3
 -13  -4   1 0.25697 1.44535   5
 -13  -4   1 0.37110 1.04275   7
  13   4  -1 -1.6795 1.00813   4
 -13   4   1 0.32388 1.33781   7
  13   4  -1 -1.4110 1.05591   6
 -12  -4   1 17.8281 2.40578   3
  12  -4  -1 19.3508 3.02592   6
 -12  -4   1 19.4151 3.56269   5
 -12  -4   1 20.8661 2.82878   7
 -12   4   1 20.3652 2.39322   3
  12   4  -1 16.4213 2.83506   4
 -12   4   1 10.3373 2.64664   7
  12   4  -1 19.5347 3.13920   6
 -11  -4   1 50.6830 3.56529   3
 -11  -4   1 48.0528 4.72659   5
 -11  -4   1 43.3731 4.21843   4
 -11  -4   1 51.6103 3.71312   7
  11  -4  -1 51.6533 4.17868   6
 -11   4   1 55.6890 3.50823   3
  11   4  -1 47.3252 4.21754   4
 -11   4   1 53.4105 5.26547   7
 -11   4   1 43.8455 3.69160   6
  11   4  -1 54.1927 4.68232   6
 -10  -4   1 16.7001 2.22210   3
  10  -4  -1 17.7294 3.08787   5
  10  -4  -1 16.9974 2.61126   6
 -10  -4   1 17.2902 2.39535   7
  10  -4  -1 18.6857 2.20683   3
 -10  -4   1 13.4083 2.65661   4
 -10  -4   1 15.1625 3.07101   5
  10   4  -1 16.3896 2.96436   4
 -10   4   1 17.0569 2.28445   3
  10   4  -1 14.6055 2.79062   6
 -10   4   1 15.6492 2.81603   7
  10   4  -1 17.2593 2.66078   3
 -10   4   1 15.0558 2.26126   6
   9  -4  -1 40.1939 3.01184   3
   9  -4  -1 48.8419 3.68447   6
  -9  -4   1 39.6349 3.03116   3
  -9  -4   1 44.2716 3.85029   4
  -9  -4   1 44.2484 3.94782   5
  -9  -4   1 42.3587 2.93612   7
   9  -4  -1 42.6117 4.07889   5
   9  -4  -1 39.4040 3.41383   7
  -9   4   1 35.5993 2.83003   3
  -9   4   1 40.4902 3.17766   6
   9   4  -1 41.6727 3.68561   4
   9   4  -1 42.7911 3.81338   6
   9   4  -1 36.8157 3.50191   3
   8  -4  -1 23.1859 2.60946   6
  -8  -4   1 19.9077 2.01164   7
   8  -4  -1 24.4971 2.69682   7
   8  -4  -1 26.4907 3.75573   5
  -8  -4   1 22.5729 3.20288   4
  -8  -4   1 19.8670 2.29149   3
   8  -4  -1 24.1968 2.29413   3
  -8  -4   1 21.6952 3.31677   5
  -8   4   1 23.6258 2.37145   6
   8   4  -1 20.6061 2.84982   3
  -8   4   1 19.5349 2.14844   3
  -8   4   1 27.1224 3.85845   7
   8   4  -1 21.7548 2.62254   4
   7  -4  -1 4.66104 1.31096   7
   7  -4  -1 1.31514 1.01945   5
   7  -4  -1 4.64278 1.21882   3
  -7  -4   1 2.79950 1.22069   4
   7  -4  -1 3.79988 1.17236   6
  -7  -4   1 4.98320 1.32716   3
  -7  -4   1 3.49373 1.20718   5
   7   4  -1 2.63080 1.10622   3
   7   4  -1 1.20970 0.98342   6
  -7   4   1 2.35178 0.99477   3
   7   4  -1 3.67318 1.22300   4
  -7   4   1 4.16820 1.19902   6
  -7   4   1 2.42021 1.25833   7
  -6  -4   1 74.3513 4.38104   5
   6  -4  -1 71.4747 4.23783   7
   6  -4  -1 70.5620 4.53621   5
   6  -4  -1 70.6399 3.66743   3
  -6  -4   1 69.6754 4.34103   4
  -6  -4   1 69.5636 3.66507   3
  -6   4   1 70.7570 3.58240   6
   6   4  -1 64.4028 3.90932   3
   6   4  -1 70.9186 4.29249   6
  -6   4   1 69.1887 3.66361   3
  -5  -4   1 148.309 6.01518   5
  -5  -4   1 148.107 6.32819   4
   5  -4  -1 149.718 6.23966   7
  -5  -4   1 144.582 5.55331   3
   5  -4  -1 139.349 5.40185   3
  -5   4   1 131.091 5.78825   6
   5   4  -1 123.493 5.94590   6
  -5   4   1 145.860 5.49622   3
  -5   4   1 131.901 6.49843   7
   5   4  -1 141.724 6.13309   4
  -5   4   1 142.737 3.91987   4
   5   4  -1 141.249 5.94275   3
  -4  -4   1 127.100 5.68526   4
   4  -4  -1 136.596 5.14409   3
  -4  -4   1 124.370 5.34672   5
  -4  -4   1 127.198 5.18671   3
   4  -4  -1 132.151 3.99060   4
   4  -4  -1 129.149 5.69161   7
  -4   4   1 132.452 5.16712   3
  -4   4   1 130.505 4.04773   4
  -4   4   1 132.740 4.87709   6
   4   4  -1 131.371 5.50314   3
  -4   4   1 135.528 6.22525   7
   4   4  -1 135.454 5.75741   4
  -3  -4   1 300.257 9.57971   4
   3  -4  -1 296.758 9.58840   7
  -3  -4   1 305.653 8.78358   7
   3  -4  -1 306.875 8.02939   4
   3  -4  -1 297.672 8.90116   3
  -3  -4   1 301.062 9.15431   3
  -3   4   1 311.058 8.05337   4
   3   4  -1 309.248 9.45135   3
  -3   4   1 294.096 8.59673   6
  -3   4   1 314.132 10.1814   7
   3   4  -1 296.485 9.49250   4
   2  -4  -1 0.21489 0.42928   4
  -2  -4   1 0.04455 0.47404   3
  -2  -4   1 0.31375 0.47405   7
  -2  -4   1 0.64904 0.66823   4
   2  -4  -1 -0.9345 0.52481   7
  -2  -4   1 -0.0435 0.57178   3
  -2   4   1 0.99208 0.58112   4
   2   4  -1 0.30402 0.63003   4
   2   4  -1 1.14794 0.68569   3
  -2   4   1 -0.2376 0.51641   7
   1  -4  -1 84.7608 4.01786   3
   1  -4  -1 74.4417 3.38752   4
   1  -4  -1 73.5904 3.88217   7
   1  -4  -1 75.7592 3.75729   3
  -1  -4   1 80.3036 3.83408   4
  -1  -4   1 79.2717 3.66820   7
  -1  -4   1 76.9865 3.69329   3
   1   4  -1 78.4516 3.84667   4
  -1   4   1 82.3256 4.14757   7
  -1   4   1 81.1929 3.50905   4
   1   4  -1 88.2775 4.82529   3
   0  -4  -1 0.85950 0.71724   3
   0  -4  -1 -0.1253 0.44224   7
   0  -4  -1 1.09199 0.70806   3
   0  -4   1 0.21558 0.40257   4
   0  -4  -1 -0.3156 0.46302   4
   0  -4   1 0.25151 0.62887   3
   0  -4   1 0.58699 0.60327   3
   0  -4   1 -0.1511 0.46862   7
   0   4  -1 0.81909 0.73875   7
   0   4   1 0.65167 0.76125   4
   0   4   1 -0.8035 0.43633   7
   0   4  -1 0.96225 0.68917   4
  -1  -4  -1 1100.74 25.5289   4
   1  -4   1 1077.84 25.6987   3
   1  -4   1 1111.96 24.9502   4
  -1  -4  -1 1085.78 25.5408   7
  -1  -4  -1 1095.27 25.6616   3
   1  -4   1 1118.97 25.6253   7
   1   4   1 1059.02 25.3873   4
  -1   4  -1 1075.14 25.8052   7
  -1   4  -1 1069.40 24.9572   4
   1   4   1 1053.82 25.5366   3
  -2  -4  -1 1136.44 26.8878   3
   2  -4   1 1170.15 25.9168   4
  -2  -4  -1 1169.16 26.7948   7
   2  -4   1 1165.67 27.0902   7
   2  -4   1 1120.17 26.5103   3
  -2  -4  -1 1021.26 27.6621   4
  -2   4  -1 1159.73 26.8226   3
   2   4   1 1141.24 27.0940   3
  -2   4  -1 1157.49 27.5314   7
  -2   4  -1 1146.27 25.9570   4
   2   4   1 1226.46 27.2810   4
   3  -4   1 1531.25 35.6089   7
  -3  -4  -1 1575.65 35.3475   3
   3  -4   1 1588.98 33.8522   4
  -3  -4  -1 1573.09 35.8124   4
   3  -4   1 1552.33 34.9554   3
  -3   4  -1 1550.23 36.3093   7
   3   4   1 1476.81 35.5340   4
  -3   4  -1 1579.04 34.0283   4
  -3   4  -1 1513.18 34.7677   6
   3   4   1 1538.40 35.5415   3
  -3   4  -1 1585.14 35.2766   3
   4  -4   1 103.951 4.42886   3
  -4  -4  -1 100.736 4.53589   3
   4  -4   1 97.3371 4.72058   7
  -4   4  -1 97.5204 5.16848   7
   4   4   1 100.830 4.77604   3
  -4   4  -1 104.256 4.33493   6
  -4   4  -1 105.448 4.61323   3
  -4   4  -1 101.352 3.58900   4
   4   4   1 96.9362 4.80041   4
  -5  -4  -1 51.3064 3.18704   3
   5  -4   1 56.9765 3.59255   7
  -5  -4  -1 53.9853 3.64231   4
   5  -4   1 54.2157 3.15153   3
  -5  -4  -1 53.1930 3.39837   5
   5   4   1 57.0804 3.69752   6
  -5   4  -1 53.1035 2.26698   4
  -5   4  -1 53.5460 3.07638   6
   5   4   1 50.3762 3.37945   3
  -5   4  -1 52.0667 3.25369   3
  -5   4  -1 52.6794 3.92372   7
   6  -4   1 5.69839 1.23310   3
   6  -4   1 6.55262 1.51584   5
  -6  -4  -1 5.12823 1.27753   3
  -6  -4  -1 4.89084 1.23101   4
  -6  -4  -1 5.60034 1.86484   5
   6  -4   1 6.07235 1.46629   7
   6   4   1 4.93008 1.41418   6
  -6   4  -1 5.54271 0.76446   4
   6   4   1 4.36973 1.30268   3
  -6   4  -1 5.07539 1.64378   7
   6   4   1 3.25374 1.37514   4
  -6   4  -1 5.16521 1.30044   3
  -6   4  -1 7.16999 1.35623   6
   7  -4   1 105.163 5.46807   7
  -7  -4  -1 119.887 5.77369   5
   7  -4   1 115.531 5.62521   6
  -7  -4  -1 122.323 6.07489   4
  -7  -4  -1 120.127 5.27670   3
   7  -4   1 113.173 4.99566   3
   7  -4   1 117.338 6.22890   5
   7   4   1 116.532 5.85058   6
  -7   4  -1 113.145 5.11300   6
   7   4   1 108.494 5.51978   3
  -7   4  -1 115.343 5.19333   3
  -8  -4  -1 10.3080 2.17578   4
   8  -4   1 7.65302 1.88850   5
  -8  -4  -1 7.77180 2.17645   5
   8  -4   1 6.69478 1.56002   7
   8  -4   1 8.42306 1.62508   3
  -8  -4  -1 7.49261 1.63018   3
   8  -4   1 7.00476 1.66961   6
   8   4   1 10.1105 2.45494   6
   8   4   1 6.02012 1.71459   3
   8   4   1 7.45411 2.04896   4
  -8   4  -1 9.71072 1.83248   3
  -8   4  -1 7.93874 1.49183   6
  -8   4  -1 8.66982 2.32037   7
   9  -4   1 182.530 7.62972   6
  -9  -4  -1 165.885 7.76454   5
   9  -4   1 153.276 7.17383   7
  -9  -4  -1 168.755 6.54276   7
  -9  -4  -1 173.236 9.21495   4
  -9  -4  -1 164.251 6.59318   3
   9  -4   1 169.929 8.28523   5
  -9   4  -1 170.011 6.82610   3
  -9   4  -1 165.319 6.97033   6
   9   4   1 162.253 7.49237   3
   9   4   1 158.529 7.56767   6
   9   4   1 168.206 7.63133   4
  10  -4   1 1.24308 1.00798   3
 -10  -4  -1 0.51150 1.20987   5
  10  -4   1 1.21784 1.36921   5
 -10  -4  -1 -0.3336 1.14805   4
 -10  -4  -1 -0.6037 0.90568   7
 -10  -4  -1 2.16204 1.20568   3
  10  -4   1 0.22023 1.05963   6
  10   4   1 0.87523 0.98991   4
  10   4   1 0.31787 1.02779   6
 -10   4  -1 -0.2273 0.75019   6
  10   4   1 1.51866 1.19420   3
 -10   4  -1 0.58321 1.12858   7
 -10   4  -1 0.62463 0.98024   3
 -11  -4  -1 9.48765 2.80912   5
 -11  -4  -1 7.18373 2.26374   4
 -11  -4  -1 10.2553 2.07992   3
 -11  -4  -1 8.20575 1.85725   7
  11  -4   1 6.25493 2.02689   6
  11   4   1 6.26068 2.01871   6
 -11   4  -1 6.40266 2.33982   7
 -11   4  -1 11.7767 2.11929   3
 -11   4  -1 6.18738 1.68199   6
  11   4   1 7.01985 2.11074   4
  12  -4   1 73.7460 5.35333   6
 -12  -4  -1 63.8332 4.59725   7
 -12  -4  -1 74.4831 6.11475   5
 -12  -4  -1 79.3030 4.60809   3
 -12   4  -1 85.0945 4.74553   3
 -12   4  -1 78.1228 6.61957   7
  12   4   1 72.1542 5.54566   6
  12   4   1 81.2385 5.52370   4
 -13  -4  -1 26.7096 3.17770   7
 -13  -4  -1 23.0288 2.69936   3
  13  -4   1 13.0353 2.60885   6
 -13  -4  -1 20.9054 4.50825   5
 -13   4  -1 14.6993 3.44779   7
 -13   4  -1 18.2696 2.62530   3
  13   4   1 20.6969 3.58095   4
  13   4   1 23.2566 5.81391   6
  14  -4   1 72.4692 5.70037   6
 -14  -4  -1 63.8843 5.04235   7
 -14  -4  -1 60.2912 6.22185   5
 -14  -4  -1 66.1728 4.25836   3
  14   4   1 70.8173 5.95303   6
  14   4   1 59.3067 5.19851   4
 -14   4  -1 75.1593 4.44662   3
 -14   4  -1 72.5562 7.05320   7
  15  -4   1 141.627 8.31223   6
 -15  -4  -1 141.829 7.82945   7
 -15  -4  -1 135.651 6.29417   3
 -15  -4  -1 135.976 9.45591   5
  15   4   1 147.357 8.80194   6
  15   4   1 149.498 8.29470   4
 -15   4  -1 141.678 6.14405   3
 -15   4  -1 139.509 10.0179   7
 -16  -4  -1 6.05258 2.82528   5
  16  -4   1 6.76993 2.50948   6
 -16  -4  -1 4.69747 1.70445   3
 -16  -4  -1 5.98641 2.37805   7
 -16   4  -1 4.35628 3.23553   7
  16   4   1 5.73864 2.31931   4
  16   4   1 4.82269 2.37660   6
 -17  -4  -1 29.9798 5.79871   5
  17  -4   1 18.8309 3.80960   6
 -17  -4  -1 17.3169 2.38962   3
 -17  -4  -1 17.5450 3.42974   7
  17   4   1 25.0616 4.33045   6
 -17   4  -1 14.9833 4.25052   7
 -18  -4  -1 31.2363 4.62847   7
  18  -4   1 29.0591 4.68553   6
 -18  -4  -1 29.4492 5.89325   5
  18   4   1 29.3332 4.75632   6
 -18   4  -1 33.5329 6.20295   7
 -17  -5   1 20.0122 6.62004   5
 -17  -5   1 19.8360 2.46035   3
  17  -5  -1 24.0105 4.21471   6
 -17   5   1 12.5271 3.81213   7
  17   5  -1 20.8588 3.95828   4
 -16  -5   1 16.3197 2.40448   3
  16  -5  -1 18.9866 3.69878   6
 -16  -5   1 16.2450 3.26305   7
 -16  -5   1 21.7605 4.45574   5
  16   5  -1 14.6431 3.51398   6
  16   5  -1 22.1260 4.19800   4
 -16   5   1 19.5533 4.87777   7
 -15  -5   1 31.9127 3.67419   7
 -15  -5   1 31.5079 3.87184   3
 -15  -5   1 24.0914 2.76702   3
 -15  -5   1 22.7854 5.14779   5
  15  -5  -1 30.0425 4.87169   6
  15   5  -1 22.0509 3.86811   6
  15   5  -1 21.2601 3.89203   4
 -15   5   1 19.0053 4.99551   7
  14  -5  -1 9.83795 2.61141   6
 -14  -5   1 8.80410 2.15700   3
 -14  -5   1 6.05330 1.74713   3
 -14  -5   1 8.75071 2.32382   7
 -14  -5   1 10.0421 3.49010   5
  14   5  -1 11.8448 3.48746   4
  14   5  -1 11.9943 3.23820   6
 -14   5   1 10.0273 3.30159   7
 -13  -5   1 3.25525 1.40459   3
 -13  -5   1 1.78322 1.63159   5
 -13  -5   1 2.94014 1.50275   3
 -13  -5   1 4.80246 1.71146   7
  13  -5  -1 3.60362 1.69651   6
  13   5  -1 5.89442 2.21589   6
 -13   5   1 6.69009 2.93602   7
  13   5  -1 3.70747 1.86265   4
 -12  -5   1 44.5156 4.87684   5
  12  -5  -1 41.0648 4.02477   6
 -12  -5   1 40.6069 3.49308   7
 -12  -5   1 40.5828 3.35763   3
 -12   5   1 42.7010 5.11377   7
  12   5  -1 40.5951 4.27330   4
  12   5  -1 36.3175 4.23205   6
 -11  -5   1 25.5035 4.12756   5
 -11  -5   1 32.1890 3.06133   3
 -11  -5   1 30.6333 2.88969   7
  11  -5  -1 29.6166 3.39248   6
  11   5  -1 32.4563 4.30353   6
  11   5  -1 35.1408 3.87655   4
 -11   5   1 31.4281 3.18316   6
 -11   5   1 47.9914 5.12514   7
 -10  -5   1 25.2101 3.83050   5
 -10  -5   1 21.7431 2.57262   3
  10   5  -1 18.6694 2.87062   6
 -10   5   1 23.1724 3.76615   7
  10   5  -1 32.1213 3.64701   4
 -10   5   1 25.1803 2.58458   3
 -10   5   1 25.4403 2.77921   6
  -9  -5   1 515.966 16.4570   5
   9  -5  -1 512.446 17.2087   5
  -9  -5   1 514.325 14.4707   3
  -9  -5   1 504.729 16.5537   4
  -9  -5   1 519.129 13.9721   7
   9  -5  -1 491.961 14.5596   3
   9   5  -1 507.913 16.1434   3
   9   5  -1 533.150 16.5747   6
   9   5  -1 496.304 16.2102   4
  -9   5   1 509.676 14.8774   6
  -9   5   1 515.938 15.0718   3
  -9   5   1 509.297 17.8705   7
   8  -5  -1 1070.37 27.5677   7
   8  -5  -1 1024.30 26.2022   3
  -8  -5   1 1094.76 26.0033   3
  -8  -5   1 1043.54 28.0835   4
  -8  -5   1 1075.09 27.7130   5
   8  -5  -1 1074.57 28.8706   5
  -8   5   1 1056.50 27.6300   3
  -8   5   1 1040.29 29.3508   7
  -8   5   1 1038.82 25.9492   6
   8   5  -1 1096.41 27.8439   4
   8   5  -1 1014.56 27.3730   3
   8   5  -1 1062.16 27.8251   6
  -7  -5   1 1254.89 29.3942   3
   7  -5  -1 1210.44 31.6948   5
   7  -5  -1 1232.88 29.3789   3
  -7  -5   1 1200.62 31.2066   4
  -7  -5   1 1180.99 30.4981   5
   7   5  -1 1272.29 31.2468   6
   7   5  -1 1205.24 30.7452   3
  -7   5   1 1227.20 32.5158   7
   7   5  -1 1286.95 31.2299   4
  -7   5   1 1242.98 29.3833   3
  -7   5   1 1193.85 29.0751   6
   6  -5  -1 1165.24 29.2740   7
   6  -5  -1 1157.86 27.9096   3
  -6  -5   1 1192.07 28.0418   3
  -6  -5   1 1158.08 29.5876   4
  -6  -5   1 1172.66 28.9916   5
   6   5  -1 1187.51 29.5909   6
  -6   5   1 1198.64 25.2276   4
   6   5  -1 1162.45 29.4002   4
   6   5  -1 1162.12 29.1269   3
  -6   5   1 1128.37 30.4834   7
  -6   5   1 1129.31 27.4276   6
   5  -5  -1 441.741 12.4519   3
   5  -5  -1 437.562 13.4383   7
  -5  -5   1 424.258 13.4808   4
  -5  -5   1 428.255 12.9969   5
  -5  -5   1 390.265 16.8666   3
   5   5  -1 418.351 13.1397   3
  -5   5   1 421.801 11.9636   6
   5   5  -1 448.978 13.6007   4
  -5   5   1 427.531 10.5527   4
  -5   5   1 420.179 14.1618   7
   4  -5  -1 37.7383 2.75128   3
  -4  -5   1 33.2167 2.60421   7
  -4  -5   1 38.7643 3.17940   4
  -4  -5   1 35.5514 2.84547   3
  -4  -5   1 36.1357 2.88499   3
   4  -5  -1 38.9458 3.19400   7
   4  -5  -1 37.2805 2.13510   4
   4   5  -1 35.2717 3.75022   4
  -4   5   1 37.1661 2.19790   4
  -4   5   1 38.6404 4.51661   7
  -4   5   1 34.3604 2.52801   6
   4   5  -1 36.5067 3.03382   3
  -3  -5   1 187.656 6.69326   7
   3  -5  -1 182.599 6.73511   3
  -3  -5   1 188.072 7.00064   3
  -3  -5   1 177.838 6.96352   3
   3  -5  -1 182.949 5.97719   4
   3  -5  -1 187.972 7.41922   7
  -3  -5   1 182.527 7.27956   4
   3   5  -1 173.293 7.08868   3
  -3   5   1 175.576 7.63313   7
   3   5  -1 184.452 7.32055   4
  -3   5   1 187.592 6.03783   4
   2  -5  -1 416.669 11.3830   4
  -2  -5   1 414.056 12.4479   4
   2  -5  -1 423.194 12.0622   3
   2  -5  -1 426.197 12.6125   3
  -2  -5   1 421.122 12.4103   3
  -2  -5   1 434.346 12.0341   7
   2  -5  -1 418.690 12.6466   7
  -2  -5   1 410.690 12.1245   3
  -2   5   1 423.183 13.0597   7
  -2   5   1 439.887 11.5262   4
   2   5  -1 398.324 12.3613   3
   2   5  -1 424.998 12.5475   4
  -1  -5   1 205.923 7.37291   4
   1  -5  -1 194.642 7.49593   3
  -1  -5   1 205.913 7.27047   3
  -1  -5   1 193.922 7.40705   3
   1  -5  -1 193.312 7.08692   3
   1  -5  -1 217.483 7.03736   4
  -1  -5   1 203.023 7.14929   7
   1  -5  -1 195.120 7.50975   7
  -1   5   1 207.019 6.94180   4
   1   5  -1 203.412 7.39624   4
   1   5  -1 195.503 7.33790   3
  -1   5   1 196.252 7.70356   7
   0  -5  -1 284.024 9.34102   3
   0  -5   1 268.775 8.83319   3
   0  -5   1 270.975 8.79465   4
   0  -5  -1 274.398 9.18045   7
   0  -5  -1 288.102 8.94639   4
   0  -5  -1 275.134 8.95240   3
   0   5   1 284.964 8.91155   4
   0   5  -1 282.423 8.96587   4
   0   5  -1 272.129 9.08621   7
   1  -5   1 296.701 9.13178   4
  -1  -5  -1 289.257 9.35363   3
  -1  -5  -1 292.796 9.45884   4
  -1  -5  -1 293.766 10.6173   7
   1  -5   1 295.367 9.80095   3
   1  -5   1 288.730 9.22101   3
   1  -5   1 301.194 9.57296   7
  -1  -5  -1 293.294 9.65577   3
   1   5   1 293.728 9.43760   4
  -1   5  -1 310.474 9.94102   7
   1   5   1 284.257 9.47029   3
  -1   5  -1 292.823 9.05600   4
   2  -5   1 412.512 12.6217   3
   2  -5   1 425.152 11.5510   4
   2  -5   1 416.247 12.4811   7
   2  -5   1 417.580 12.0992   3
  -2  -5  -1 417.477 12.5156   4
  -2  -5  -1 427.116 12.5789   3
   2   5   1 446.645 12.6842   4
  -2   5  -1 435.213 13.0942   7
  -2   5  -1 435.212 11.7025   4
   2   5   1 411.047 12.5427   3
   3  -5   1 503.903 12.8015   4
  -3  -5  -1 487.976 14.4394   4
   3  -5   1 474.303 13.5937   3
  -3  -5  -1 511.817 14.2377   3
   3  -5   1 507.084 14.4062   7
  -3   5  -1 511.924 14.1421   3
   3   5   1 503.189 14.4554   4
  -3   5  -1 501.812 13.6239   6
  -3   5  -1 505.222 15.1044   7
   3   5   1 483.378 14.3513   3
  -3   5  -1 497.909 12.9319   4
  -4  -5  -1 914.884 24.0113   4
   4  -5   1 963.187 23.9803   7
   4  -5   1 946.561 23.0551   3
   4  -5   1 971.446 21.5618   4
  -4  -5  -1 908.058 26.2217   3
   4   5   1 936.600 23.8741   3
  -4   5  -1 949.307 21.7421   4
  -4   5  -1 929.430 22.7544   6
  -4   5  -1 870.753 25.2791   7
   4   5   1 908.076 24.2602   4
  -4   5  -1 982.456 23.4985   3
   5  -5   1 995.586 25.1894   7
   5  -5   1 980.761 24.1961   3
  -5  -5  -1 1013.58 24.5650   3
  -5  -5  -1 986.826 25.5789   4
  -5  -5  -1 963.232 24.7485   5
  -5   5  -1 993.859 24.5688   3
  -5   5  -1 973.695 23.9671   6
  -5   5  -1 1018.39 26.5600   7
   5   5   1 966.724 25.3724   6
  -5   5  -1 997.833 22.4916   4
   5   5   1 967.201 25.1805   3
   5   5   1 1007.54 25.4387   4
  -6  -5  -1 91.5256 4.77581   3
   6  -5   1 90.7473 5.11128   7
  -6  -5  -1 89.1708 5.01262   5
   6  -5   1 88.1716 4.54520   3
  -6  -5  -1 85.9819 5.23502   4
   6   5   1 92.1118 5.24727   4
  -6   5  -1 90.9364 4.49987   6
  -6   5  -1 94.9055 5.92353   7
   6   5   1 99.1494 5.28654   3
  -6   5  -1 89.9758 3.30508   4
   6   5   1 93.0865 5.37906   6
  -7  -5  -1 6.99466 1.79408   5
   7  -5   1 7.43555 1.83333   5
   7  -5   1 9.47701 1.73084   3
  -7  -5  -1 7.29696 1.69131   3
  -7  -5  -1 7.05013 1.74147   4
  -7   5  -1 9.07902 1.64394   6
  -7   5  -1 7.24158 2.01094   7
   7   5   1 5.83457 1.66451   4
   7   5   1 6.31767 1.87705   6
  -7   5  -1 5.79896 1.60717   3
   7   5   1 5.44425 2.09774   3
  -8  -5  -1 -1.8673 0.79396   4
   8  -5   1 -1.3068 0.63378   7
   8  -5   1 1.55766 1.16730   5
  -8  -5  -1 1.49465 1.20465   3
  -8  -5  -1 0.07334 0.97488   5
  -8   5  -1 0.47373 0.89087   3
  -8   5  -1 0.70311 1.14396   7
   8   5   1 -1.7528 0.73467   3
   8   5   1 2.66897 1.42074   6
   8   5   1 1.06172 1.36704   4
  -8   5  -1 1.24411 1.00839   6
  -9  -5  -1 1.54189 1.42390   5
  -9  -5  -1 0.93638 0.97126   7
   9  -5   1 0.19545 0.82784   3
  -9  -5  -1 0.30655 1.20885   4
   9  -5   1 -1.1801 1.12685   5
  -9  -5  -1 0.41755 0.96236   3
  -9   5  -1 1.31194 1.38857   7
   9   5   1 -0.7685 0.87353   6
  -9   5  -1 1.47844 1.09596   6
   9   5   1 -0.2992 1.06213   4
  -9   5  -1 -0.5975 0.89125   3
 -10  -5  -1 7.81411 2.33556   5
 -10  -5  -1 8.04805 1.76129   7
 -10  -5  -1 6.41855 1.75071   3
  10   5   1 6.21133 2.08180   6
 -10   5  -1 6.17323 1.87090   6
 -10   5  -1 6.76245 2.35898   7
  10   5   1 8.86994 2.33127   4
 -10   5  -1 7.75985 1.88291   3
 -11  -5  -1 5.49710 2.07666   5
  11  -5   1 11.0711 2.33404   6
 -11  -5  -1 10.7073 2.15518   3
 -11  -5  -1 12.1081 2.15738   7
  11   5   1 10.6459 2.45846   6
 -11   5  -1 10.6014 2.16699   3
 -11   5  -1 8.13130 2.86413   7
  11   5   1 10.8624 2.66067   4
 -12  -5  -1 2.04815 1.29944   7
 -12  -5  -1 -1.0473 0.96228   3
  12  -5   1 -0.3419 1.06497   6
 -12  -5  -1 0.89355 1.56007   5
 -12   5  -1 1.55171 1.25948   3
  12   5   1 1.07142 1.32741   4
 -12   5  -1 0.26308 1.35582   7
  12   5   1 1.36309 1.33681   6
 -13  -5  -1 0.67240 1.30650   3
 -13  -5  -1 0.13113 1.13164   7
  13  -5   1 3.32903 1.90918   6
 -13  -5  -1 2.88855 2.04925   5
 -13   5  -1 0.72409 1.55872   7
  13   5   1 0.48144 1.55232   6
  13   5   1 0.69589 1.45267   4
 -13   5  -1 3.43080 1.47751   3
 -14  -5  -1 4.96541 1.77945   7
  14  -5   1 0.54259 1.50359   6
 -14  -5  -1 1.28629 1.32173   3
 -14  -5  -1 0.75443 1.84829   5
 -14   5  -1 1.26468 2.42500   7
  14   5   1 1.83296 2.10769   4
  14   5   1 2.51708 2.04709   6
 -15  -5  -1 31.7549 5.35437   5
  15  -5   1 48.0745 5.00190   6
 -15  -5  -1 37.3997 4.14542   7
 -15  -5  -1 42.1637 3.59183   3
  15   5   1 27.8026 4.50800   4
  15   5   1 29.0001 5.00189   6
 -15   5  -1 35.9109 5.54931   7
  16  -5   1 25.3185 4.19370   6
 -16  -5  -1 23.4991 5.18102   5
 -16  -5  -1 21.5999 3.75325   7
 -16  -5  -1 27.8397 3.08216   3
  16   5   1 27.6459 4.25772   4
 -16   5  -1 30.7562 6.29376   7
  16   5   1 22.2064 4.11775   6
 -17  -5  -1 28.6681 3.31422   3
 -17  -5  -1 31.6419 6.19759   5
  17  -5   1 29.9960 4.78093   6
 -17  -5  -1 41.8378 4.70757   7
  17   5   1 42.2182 4.90092   4
  17   5   1 40.7010 6.20865   6
 -17  -6   1 89.2348 8.58753   5
 -17  -6   1 86.7712 4.90140   3
  17   6  -1 90.6520 7.47814   4
  17   6  -1 95.1491 8.02705   6
 -17   6   1 101.049 9.85370   7
 -16  -6   1 88.0285 5.93587   7
 -16  -6   1 80.5998 4.71837   3
 -16  -6   1 84.9943 8.07934   5
  16   6  -1 79.1820 6.82505   4
 -16   6   1 71.4308 8.06438   7
  16   6  -1 88.8484 7.43575   6
 -15  -6   1 64.0667 4.30661   3
 -15  -6   1 63.6157 4.87109   7
  15   6  -1 60.5328 6.20508   6
 -15   6   1 65.3175 7.65427   7
  15   6  -1 74.2667 6.37751   4
 -14  -6   1 0.41755 1.30225   3
 -14  -6   1 2.24070 1.53823   7
 -14  -6   1 6.95822 2.22980   3
 -14  -6   1 0.39916 1.69789   5
  14   6  -1 2.43157 1.92241   4
  14   6  -1 3.19163 2.17186   6
 -14   6   1 0.65367 1.90985   7
 -13  -6   1 34.7705 3.50761   7
 -13  -6   1 35.1871 3.30555   3
 -13  -6   1 34.5171 4.97810   5
 -13  -6   1 35.1651 3.73416   3
  13   6  -1 41.3481 4.56142   4
 -13   6   1 33.9311 5.77527   7
  13   6  -1 26.2811 4.43860   6
 -12  -6   1 12.2656 2.36698   7
 -12  -6   1 10.1219 2.21570   3
 -12  -6   1 13.2379 3.14172   5
 -12  -6   1 8.99008 2.00046   3
  12   6  -1 8.94189 2.50643   6
  12   6  -1 11.5600 3.12892   4
 -12   6   1 8.87694 3.02320   7
 -11  -6   1 0.69833 1.44878   5
 -11  -6   1 1.17782 1.23441   3
 -11  -6   1 -1.3981 0.86625   7
 -11  -6   1 0.80072 1.17557   3
  11   6  -1 2.15158 1.68404   4
  11   6  -1 -1.9541 1.15238   6
 -11   6   1 -0.3664 1.50733   7
 -10  -6   1 23.6988 2.47780   7
 -10  -6   1 24.8985 2.83492   3
 -10  -6   1 26.2261 3.05855   3
 -10  -6   1 24.8417 4.15662   5
  10   6  -1 23.9198 3.56067   4
  10   6  -1 24.9921 3.80608   6
 -10   6   1 17.4448 3.27438   7
 -10   6   1 23.0158 2.69224   6
  -9  -6   1 43.4142 4.26599   5
  -9  -6   1 49.0208 4.01385   3
  -9  -6   1 44.4415 3.58917   3
   9   6  -1 45.7622 4.41705   6
  -9   6   1 44.5276 4.04805   6
   9   6  -1 37.8274 4.15958   4
  -9   6   1 44.9878 4.99474   7
  -8  -6   1 0.41884 0.88702   3
  -8  -6   1 0.47898 0.91831   3
   8  -6  -1 0.80966 0.89447   3
  -8  -6   1 1.55875 1.28447   5
  -8   6   1 0.42833 0.71322   6
  -8   6   1 0.92825 1.35280   7
   8   6  -1 -0.6073 0.92031   4
   8   6  -1 0.78620 1.02287   6
   7  -6  -1 3.28648 1.26421   3
  -7  -6   1 2.59402 1.35135   3
  -7  -6   1 4.93562 1.68759   5
  -7  -6   1 5.99648 1.66849   4
  -7  -6   1 3.89517 1.45028   3
   7  -6  -1 2.43359 1.24032   7
   7   6  -1 3.38387 1.40186   3
   7   6  -1 3.86903 1.58411   4
  -7   6   1 6.98100 2.07738   7
  -7   6   1 6.22357 1.46770   6
   7   6  -1 2.82023 1.32297   6
  -6  -6   1 37.7508 3.66988   4
  -6  -6   1 27.8433 2.88050   3
  -6  -6   1 26.6390 3.19105   5
   6  -6  -1 31.8350 3.33918   7
   6  -6  -1 28.5412 3.92174   3
  -6  -6   1 30.5975 3.10170   3
  -6  -6   1 30.7158 2.80055   7
  -6   6   1 29.3165 4.15445   7
   6   6  -1 24.3100 3.69152   6
   6   6  -1 30.5602 3.47720   4
  -6   6   1 35.2505 2.05693   4
  -6   6   1 32.8648 2.78752   6
   6   6  -1 32.6559 3.36972   3
  -5  -6   1 82.1494 4.49671   7
   5  -6  -1 69.1488 4.27130   3
   5  -6  -1 76.3009 3.35130   4
  -5  -6   1 80.6266 4.87006   3
  -5  -6   1 77.6687 5.21192   4
  -5  -6   1 81.0297 4.75028   3
  -5  -6   1 82.0633 5.02501   5
   5  -6  -1 72.8615 4.87907   7
  -5   6   1 69.9991 5.39688   7
   5   6  -1 78.4075 5.16753   4
   5   6  -1 73.9133 4.82125   3
  -5   6   1 78.5946 3.50877   4
  -5   6   1 79.0742 4.27107   6
   4  -6  -1 253.641 9.04630   3
   4  -6  -1 257.731 9.84801   7
  -4  -6   1 273.053 9.12529   7
  -4  -6   1 269.803 9.48703   3
  -4  -6   1 254.215 9.82510   4
  -4  -6   1 267.210 9.51994   3
   4  -6  -1 270.109 8.00692   4
   4   6  -1 263.078 9.98643   4
  -4   6   1 258.881 10.5778   7
  -4   6   1 261.180 8.73290   6
   4   6  -1 268.372 9.93779   3
  -4   6   1 248.109 7.88859   4
   3  -6  -1 196.250 7.52733   3
  -3  -6   1 197.306 8.06182   4
   3  -6  -1 194.808 8.10371   3
   3  -6  -1 195.772 7.65584   4
  -3  -6   1 191.725 7.79327   3
  -3  -6   1 191.923 7.37668   7
  -3  -6   1 185.646 7.54417   3
   3  -6  -1 190.000 8.02521   7
  -3   6   1 187.418 6.65959   4
   3   6  -1 206.383 8.24970   4
  -3   6   1 192.911 8.56246   7
   3   6  -1 186.259 7.89192   3
  -2  -6   1 215.710 8.04414   7
   2  -6  -1 238.234 8.98638   3
  -2  -6   1 234.899 8.70497   4
  -2  -6   1 223.608 8.30385   3
   2  -6  -1 226.347 7.65086   4
   2  -6  -1 211.167 8.50173   7
   2  -6  -1 218.428 8.13958   3
  -2  -6   1 228.219 8.62743   3
   2   6  -1 205.095 8.32294   3
   2   6  -1 228.090 8.63102   4
  -2   6   1 208.084 10.3114   7
  -2   6   1 215.069 7.53815   4
   1  -6  -1 11.6804 1.87996   4
  -1  -6   1 10.2487 2.17559   3
  -1  -6   1 11.2624 1.88191   7
  -1  -6   1 10.1760 1.95224   3
   1  -6  -1 11.5853 2.17373   3
  -1  -6   1 12.8054 2.24733   4
   1  -6  -1 7.89611 1.66535   3
   1  -6  -1 10.2147 1.77212   7
   1   6  -1 11.4589 2.25827   4
  -1   6   1 13.7265 2.56944   7
  -1   6   1 12.3083 2.01777   4
   0  -6   1 173.800 6.84026   4
   0  -6   1 166.742 7.20175   3
   0  -6  -1 156.590 6.69343   3
   0  -6   1 173.934 6.96945   7
   0  -6  -1 168.518 7.10773   7
   0  -6  -1 163.674 7.16735   3
   0  -6  -1 167.223 6.69935   4
   0  -6   1 149.850 6.53726   3
   0   6  -1 165.727 7.05577   7
   0   6  -1 164.732 6.76199   4
   0   6   1 159.417 6.61053   4
   1  -6   1 170.153 6.61226   4
   1  -6   1 179.502 7.16766   7
  -1  -6  -1 171.132 7.01139   3
   1  -6   1 164.766 7.30886   3
  -1  -6  -1 179.053 7.13352   4
  -1  -6  -1 177.667 7.41377   3
  -1  -6  -1 167.466 7.08824   7
   1  -6   1 159.877 6.72836   3
   1   6   1 152.187 6.73460   4
  -1   6  -1 164.880 7.30455   7
  -1   6  -1 180.247 6.85030   4
  -2  -6  -1 1270.91 30.8705   3
  -2  -6  -1 1202.02 30.3462   3
  -2  -6  -1 1274.78 30.6259   7
   2  -6   1 1286.11 31.2493   3
   2  -6   1 1280.95 29.5438   4
  -2  -6  -1 1230.41 30.6878   4
   2  -6   1 1233.33 30.1634   3
   2  -6   1 1278.90 30.8132   7
   2   6   1 1239.46 30.7998   3
  -2   6  -1 1294.06 29.6964   4
   2   6   1 1258.42 30.7576   4
  -2   6  -1 1186.64 31.5126   7
   3  -6   1 607.587 17.4915   7
   3  -6   1 616.221 16.3030   4
  -3  -6  -1 617.156 17.7491   4
  -3  -6  -1 627.564 17.2594   7
   3  -6   1 592.516 16.7475   3
  -3  -6  -1 624.063 17.3467   3
  -3  -6  -1 634.661 17.5170   3
  -3   6  -1 627.759 16.1373   4
  -3   6  -1 614.511 18.3244   7
   3   6   1 623.494 17.6517   4
   3   6   1 617.506 17.7394   3
   4  -6   1 46.6599 3.75844   7
  -4  -6  -1 56.4191 4.04545   3
   4  -6   1 56.5819 3.72024   3
   4  -6   1 55.2753 3.00882   4
  -4  -6  -1 55.2783 3.78788   7
   4   6   1 54.4558 4.13060   3
  -4   6  -1 49.8565 3.43776   6
  -4   6  -1 52.5762 4.45427   7
  -4   6  -1 48.4733 3.01874   4
  -5  -6  -1 110.282 5.90346   5
   5  -6   1 104.734 5.79015   7
  -5  -6  -1 109.023 5.71011   3
   5  -6   1 96.5977 5.16298   3
  -5  -6  -1 100.484 5.35178   7
  -5   6  -1 111.603 6.67582   7
  -5   6  -1 107.101 5.23848   6
   5   6   1 111.228 6.15590   4
   5   6   1 100.790 6.26596   3
  -5   6  -1 110.236 4.44441   4
   6  -6   1 257.881 10.0932   7
  -6  -6  -1 280.031 10.2790   5
  -6  -6  -1 261.494 9.60984   3
   6  -6   1 267.367 9.47049   3
  -6  -6  -1 280.225 10.8487   4
   6   6   1 278.797 10.5991   6
  -6   6  -1 266.212 11.3796   7
  -6   6  -1 266.935 9.25412   6
   6   6   1 264.840 10.3449   3
   6   6   1 259.318 10.3850   4
  -6   6  -1 279.139 9.90220   3
  -6   6  -1 276.236 7.78638   4
  -7  -6  -1 268.832 9.77169   3
  -7  -6  -1 270.665 11.0148   4
  -7  -6  -1 273.331 10.4413   5
   7  -6   1 279.590 9.73349   3
   7  -6   1 267.293 10.4071   7
  -7   6  -1 272.983 7.29662   4
   7   6   1 269.155 10.6993   3
  -7   6  -1 277.972 9.59001   6
  -7   6  -1 289.729 10.1078   3
  -7   6  -1 282.159 11.9756   7
   7   6   1 269.729 10.8232   4
   7   6   1 273.849 10.7965   6
   8  -6   1 635.567 20.8140   5
  -8  -6  -1 668.246 19.7209   5
  -8  -6  -1 688.855 18.6160   3
  -8   6  -1 680.515 21.8532   7
   8   6   1 658.099 20.1082   4
   8   6   1 692.945 20.2275   6
  -8   6  -1 649.235 18.6257   3
  -9  -6  -1 41.4118 3.57382   3
  -9  -6  -1 36.8573 3.93069   5
  -9   6  -1 38.2958 3.33579   6
  -9   6  -1 38.6051 5.85701   7
   9   6   1 42.3704 4.20117   6
  -9   6  -1 37.1381 3.49708   3
   9   6   1 40.6721 4.13843   4
 -10  -6  -1 61.5288 4.33565   3
 -10  -6  -1 67.4579 4.15730   7
 -10  -6  -1 65.3537 5.27885   5
 -10   6  -1 59.0118 5.85092   7
  10   6   1 60.7973 5.17591   4
  10   6   1 63.6387 5.29492   6
 -10   6  -1 59.2767 4.38557   3
 -11  -6  -1 15.8721 3.10712   5
 -11  -6  -1 17.3736 2.69992   3
 -11  -6  -1 19.8506 2.77796   7
  11   6   1 19.2552 3.33399   6
  11   6   1 15.2954 2.94534   4
 -11   6  -1 16.1261 3.30499   7
 -11   6  -1 15.6621 2.60391   3
 -12  -6  -1 6.08467 2.26009   5
 -12  -6  -1 4.81123 1.68454   7
 -12  -6  -1 6.84316 1.88740   3
 -12   6  -1 3.88692 2.02430   7
  12   6   1 5.56044 1.88093   6
  12   6   1 4.66624 2.07935   4
 -13  -6  -1 9.35863 2.24329   3
 -13  -6  -1 6.20482 2.80190   5
 -13  -6  -1 6.63674 1.92084   7
  13   6   1 9.19541 2.91681   6
 -13   6  -1 7.24597 2.62051   7
  13   6   1 9.98493 2.80715   4
 -14  -6  -1 39.5254 3.76167   3
 -14  -6  -1 42.7624 4.05028   7
 -14  -6  -1 29.9320 5.26370   5
  14   6   1 44.4605 5.02408   4
 -14   6  -1 35.9840 6.80407   7
  14   6   1 39.0407 5.15849   6
 -15  -6  -1 17.2283 3.18712   7
 -15  -6  -1 18.3493 2.77993   3
 -15  -6  -1 13.3377 3.51026   5
 -15   6  -1 9.38949 3.77329   7
  15   6   1 18.8176 3.93156   6
  15   6   1 13.2188 3.12777   4
 -16  -6  -1 -0.2217 2.11319   5
  16   6   1 -2.5624 2.12076   4
  16   6   1 0.34011 1.55221   6
 -16   6  -1 -3.5321 2.17538   7
 -17  -6  -1 12.5053 3.81142   5
 -17  -6  -1 15.8677 3.47028   7
  17   6   1 19.6872 4.35309   4
  17   6   1 17.2433 4.04663   6
 -17   6  -1 13.3381 4.13947   7
 -16  -7   1 41.4185 6.75586   5
 -16  -7   1 49.3877 4.82550   3
 -16  -7   1 49.1130 4.78704   7
 -16   7   1 44.8641 7.36799   7
  16   7  -1 44.9849 6.51053   6
  16   7  -1 65.6613 6.51157   4
 -15  -7   1 10.2853 2.21421   3
 -15  -7   1 4.82230 3.08733   5
 -15  -7   1 16.2205 2.87343   7
 -15   7   1 16.0387 4.71088   7
  15   7  -1 12.8794 3.44091   6
  15   7  -1 15.9990 3.67861   4
 -14  -7   1 32.8748 3.56862   7
 -14  -7   1 30.2008 3.42473   3
 -14  -7   1 40.6483 5.77217   5
 -14   7   1 23.3384 5.24960   7
  14   7  -1 32.6053 4.96811   4
  14   7  -1 37.4227 5.72882   6
 -13  -7   1 4.00418 1.66786   7
 -13  -7   1 1.97379 1.47426   3
 -13  -7   1 1.60765 1.73477   5
  13   7  -1 2.53484 1.72028   4
 -13   7   1 1.99521 2.55435   7
  13   7  -1 3.24379 2.10399   6
 -12  -7   1 39.1761 3.64780   3
 -12  -7   1 33.4489 4.91519   5
 -12  -7   1 38.2765 3.41133   7
  12   7  -1 34.4164 5.21598   4
  12   7  -1 43.7752 4.84499   6
 -12   7   1 43.4258 6.14512   7
 -11  -7   1 1.79666 1.17655   7
 -11  -7   1 0.30507 1.22159   3
 -11  -7   1 -1.9316 1.20459   5
  11   7  -1 -0.0282 1.47516   4
 -11   7   1 0.46826 1.60504   7
  11   7  -1 -0.8756 1.24633   6
 -10  -7   1 21.2877 2.50827   7
 -10  -7   1 16.9293 2.81690   3
 -10  -7   1 18.7249 3.70480   5
  10   7  -1 18.5609 3.65037   4
 -10   7   1 19.3767 4.26335   7
  10   7  -1 15.1959 3.17537   6
  -9  -7   1 6.48870 1.86371   3
  -9  -7   1 5.33907 1.76841   3
  -9  -7   1 6.90079 2.30930   5
  -9   7   1 3.73668 2.24819   7
   9   7  -1 7.57931 2.36032   4
  -9   7   1 6.24852 1.59155   6
   9   7  -1 10.1853 2.51228   6
  -8  -7   1 80.8196 5.68519   5
  -8  -7   1 90.5068 5.25727   7
  -8  -7   1 85.9591 5.19895   3
  -8  -7   1 90.3581 5.50443   3
  -8   7   1 77.9170 4.71101   6
  -8   7   1 84.3438 6.77182   7
   8   7  -1 80.8290 5.94417   4
   8   7  -1 83.7771 6.07515   6
  -7  -7   1 89.2960 5.33528   3
  -7  -7   1 81.1118 5.24323   3
  -7  -7   1 85.1538 5.75849   5
  -7  -7   1 88.0101 5.12897   7
  -7   7   1 99.6638 7.12024   7
   7   7  -1 96.6335 6.31691   6
  -7   7   1 87.3499 5.19515   6
  -7   7   1 92.0270 3.45439   4
   7   7  -1 91.9312 6.19463   4
  -6  -7   1 -0.2256 1.24213   5
  -6  -7   1 -0.7815 0.77567   7
  -6  -7   1 -0.6489 1.02562   3
  -6  -7   1 -1.3865 0.98646   3
   6  -7  -1 -0.7628 0.85111   3
  -6   7   1 0.78249 1.53247   7
   6   7  -1 2.15721 1.69080   4
  -6   7   1 1.86375 0.88559   4
  -6   7   1 0.01300 0.93828   6
   5  -7  -1 0.45441 1.18080   7
  -5  -7   1 1.61647 1.08199   7
   5  -7  -1 0.21979 1.03815   3
   5  -7  -1 -0.4766 0.77863   4
  -5  -7   1 -0.1949 1.15643   3
  -5  -7   1 0.46969 1.14321   3
  -5  -7   1 0.88881 1.14979   4
   5   7  -1 -0.6944 0.95227   3
   5   7  -1 1.56173 1.37143   4
  -5   7   1 0.23942 0.81829   6
  -5   7   1 -0.0773 0.80415   4
  -5   7   1 1.68794 1.50179   7
  -4  -7   1 115.091 6.54922   4
   4  -7  -1 123.916 5.23283   4
   4  -7  -1 128.470 6.93409   3
   4  -7  -1 111.999 6.43712   7
   4  -7  -1 123.705 6.10716   3
  -4  -7   1 122.455 6.39052   3
  -4  -7   1 119.287 5.91971   7
  -4   7   1 123.493 5.84831   6
   4   7  -1 118.612 6.52400   3
   4   7  -1 129.934 6.90297   4
  -4   7   1 132.355 5.45556   4
  -4   7   1 137.078 7.65088   7
   3  -7  -1 152.459 7.45501   3
  -3  -7   1 127.853 9.97335   4
   3  -7  -1 135.697 6.94188   7
  -3  -7   1 142.102 6.51690   7
  -3  -7   1 141.747 6.94682   3
   3  -7  -1 139.884 5.83605   4
  -3  -7   1 130.496 6.72537   3
   3  -7  -1 131.472 6.38596   3
   3   7  -1 125.625 6.79102   4
  -3   7   1 142.195 5.92386   4
  -3   7   1 141.729 7.55793   7
   3   7  -1 133.494 6.87954   3
  -2  -7   1 39.1931 3.23979   7
   2  -7  -1 31.8825 3.24302   7
   2  -7  -1 39.9559 3.78510   3
  -2  -7   1 32.6766 3.19490   3
  -2  -7   1 39.4535 3.72933   3
   2  -7  -1 36.2550 2.87085   4
  -2  -7   1 31.0676 3.20713   4
  -2   7   1 36.9722 3.06032   4
  -2   7   1 33.4062 3.62489   7
   2   7  -1 37.8042 3.60759   4
   1  -7  -1 70.3306 4.28740   4
  -1  -7   1 74.1028 4.70387   4
  -1  -7   1 64.0652 4.70118   3
  -1  -7   1 62.6817 4.24769   3
   1  -7  -1 75.6318 4.87518   7
  -1  -7   1 74.1482 4.54240   7
   1  -7  -1 71.2585 4.96460   3
   1  -7  -1 67.8826 5.18099   3
  -1   7   1 70.3346 4.98756   7
   1   7  -1 69.9248 4.65605   4
   0  -7  -1 -0.7024 0.74659   3
   0  -7   1 1.67699 1.20016   3
   0  -7   1 1.43042 0.84803   3
   0  -7  -1 -0.9380 0.84595   3
   0  -7  -1 1.50619 0.99999   7
   0  -7   1 1.93394 1.01150   7
   0  -7  -1 -0.0206 0.62314   4
   0  -7   1 -0.2489 0.63550   4
   0   7   1 1.41847 1.22515   4
   0   7  -1 0.47919 1.06519   4
  -1  -7  -1 2.54008 1.27696   4
  -1  -7  -1 3.89501 1.52948   3
  -1  -7  -1 4.84452 1.61153   7
  -1  -7  -1 4.46541 1.41415   3
   1  -7   1 5.01852 1.40438   7
   1  -7   1 6.03187 1.55296   4
   1  -7   1 3.39479 1.63068   3
   1  -7   1 4.05050 1.60306   3
  -1   7  -1 2.40180 1.35466   7
  -1   7  -1 3.83415 1.73073   4
   1   7   1 6.23515 1.57866   4
   2  -7   1 254.825 10.2407   3
   2  -7   1 251.873 8.81492   4
   2  -7   1 247.950 9.63912   7
  -2  -7  -1 252.411 9.74510   4
  -2  -7  -1 255.845 9.96718   3
  -2  -7  -1 280.250 14.4153   3
  -2  -7  -1 249.953 9.59929   7
   2  -7   1 228.272 10.4490   3
  -2   7  -1 254.542 8.98773   4
   2   7   1 249.291 11.3107   3
  -2   7  -1 246.686 10.2010   7
   2   7   1 252.246 9.73414   4
  -3  -7  -1 -0.2070 0.97717   7
   3  -7   1 -0.5538 0.99296   3
   3  -7   1 0.09333 0.75055   4
  -3  -7  -1 -0.0204 1.00920   4
   3  -7   1 -0.4775 0.83053   7
  -3  -7  -1 1.97486 1.38400   3
   3  -7   1 -0.8022 0.73383   3
  -3  -7  -1 1.66375 1.41587   3
  -3   7  -1 1.28525 1.13450   7
  -3   7  -1 0.94562 0.92224   4
   3   7   1 -0.2413 0.84377   4
   3   7   1 0.90997 1.04794   3
  -4  -7  -1 23.1877 3.16287   3
   4  -7   1 32.5700 3.33619   7
   4  -7   1 27.0809 2.40931   4
   4  -7   1 27.4717 3.78351   3
  -4  -7  -1 29.7119 3.39879   3
  -4  -7  -1 19.4612 2.76043   7
  -4  -7  -1 19.2312 2.90467   4
   4  -7   1 28.9991 2.90621   3
   4   7   1 26.7971 3.63596   3
   4   7   1 22.7437 3.29693   4
  -4   7  -1 23.9472 2.62081   6
  -4   7  -1 27.0921 2.55455   4
  -4   7  -1 21.8919 3.36836   7
   5  -7   1 27.2151 3.01391   3
   5  -7   1 31.5424 3.50192   7
  -5  -7  -1 32.3067 3.23144   7
  -5  -7  -1 29.4545 3.35897   4
  -5  -7  -1 31.8850 3.30623   3
  -5  -7  -1 34.7387 3.68356   3
   5   7   1 26.7848 3.74998   3
  -5   7  -1 32.0622 2.61484   4
  -5   7  -1 22.4006 3.30903   7
   5   7   1 28.2511 3.47941   4
  -5   7  -1 29.4000 2.97091   6
  -6  -7  -1 2.78857 1.30562   3
  -6  -7  -1 2.09068 1.50751   3
  -6  -7  -1 3.46257 1.61561   5
  -6  -7  -1 3.01483 1.51819   7
   6   7   1 2.54291 1.42472   6
  -6   7  -1 2.74772 1.02840   4
   6   7   1 3.17380 1.82452   4
  -6   7  -1 1.29894 1.44194   7
  -7  -7  -1 52.3596 4.11749   7
  -7  -7  -1 54.4710 4.57270   5
  -7  -7  -1 53.2471 4.26437   3
  -7  -7  -1 57.2975 4.38340   3
  -7   7  -1 54.6404 2.76192   4
   7   7   1 55.0165 4.82746   6
  -7   7  -1 52.8728 3.84183   6
  -7   7  -1 49.9822 5.14287   7
   7   7   1 59.2807 4.95302   4
  -8  -7  -1 64.9319 4.67031   3
  -8  -7  -1 62.3022 5.02033   5
  -8  -7  -1 64.9528 5.81760   3
  -8   7  -1 69.8293 6.13661   7
  -8   7  -1 66.9821 4.44191   6
   8   7   1 76.6762 5.75546   4
   8   7   1 61.6191 5.19322   6
  -9  -7  -1 9.06066 2.37204   5
  -9  -7  -1 6.85926 1.94572   3
   9   7   1 10.5270 2.50832   4
  -9   7  -1 9.73788 3.21420   7
   9   7   1 6.62102 2.14520   6
 -10  -7  -1 90.9521 5.63816   3
 -10  -7  -1 90.7784 6.62224   5
  10   7   1 98.5183 7.07103   6
  10   7   1 101.079 6.95760   4
 -10   7  -1 102.729 8.18568   7
 -11  -7  -1 228.183 8.65241   7
 -11  -7  -1 214.038 9.04135   3
 -11  -7  -1 222.261 10.9124   5
  11   7   1 228.530 10.9426   4
  11   7   1 214.309 10.7297   6
 -11   7  -1 197.832 11.8940   7
 -12  -7  -1 341.925 12.1448   3
 -12  -7  -1 355.436 11.8962   7
 -12  -7  -1 341.079 14.6988   5
  12   7   1 363.826 14.7369   6
  12   7   1 355.246 14.5687   4
 -12   7  -1 357.425 16.8469   7
 -13  -7  -1 261.601 10.7773   3
 -13  -7  -1 273.114 13.2512   5
 -13  -7  -1 256.407 10.0434   7
  13   7   1 281.367 12.9229   4
  13   7   1 288.489 13.1722   6
 -13   7  -1 277.716 15.1035   7
 -14  -7  -1 60.3373 4.54914   3
 -14  -7  -1 53.1203 4.39554   7
 -14  -7  -1 50.8919 6.06678   5
 -14   7  -1 68.3236 7.57100   7
  14   7   1 62.5580 5.89941   4
  14   7   1 57.0146 6.11211   6
 -15  -7  -1 14.0533 2.59939   3
 -15  -7  -1 28.0073 5.49321   5
 -15  -7  -1 21.4975 3.33683   7
  15   7   1 17.3958 4.23341   6
  15   7   1 14.8928 3.86390   4
 -15   7  -1 17.6189 4.61831   7
 -16  -7  -1 19.2721 4.59986   5
 -16  -7  -1 20.3934 3.47607   7
 -16  -7  -1 15.6189 2.65073   3
  16   7   1 15.3419 4.12319   6
  16   7   1 19.3952 4.18157   4
 -16   7  -1 28.1408 6.53198   7
 -15  -8   1 12.8336 2.84552   7
 -15  -8   1 5.49416 3.03772   5
 -15  -8   1 9.07055 2.17909   3
  15   8  -1 9.92743 3.39652   6
  15   8  -1 12.8802 4.61124   4
 -15   8   1 8.51150 3.69059   7
 -14  -8   1 41.8168 6.10239   5
 -14  -8   1 24.8850 3.39695   3
 -14  -8   1 39.1177 3.79097   7
  14   8  -1 30.5192 5.17389   6
  14   8  -1 35.9427 5.26981   4
 -14   8   1 29.0143 5.53726   7
 -13  -8   1 129.810 6.31710   7
 -13  -8   1 111.157 8.50179   5
 -13  -8   1 126.538 6.61135   3
  13   8  -1 124.306 8.67049   4
  13   8  -1 114.739 8.44971   6
 -13   8   1 127.641 10.3554   7
 -12  -8   1 74.2013 4.66011   7
 -12  -8   1 78.9198 6.82066   5
 -12  -8   1 81.6555 6.19118   7
 -12   8   1 83.0299 8.04791   7
  12   8  -1 92.0595 7.27753   6
  12   8  -1 76.5387 6.75838   4
 -11  -8   1 59.7684 4.08958   7
 -11  -8   1 52.9013 4.81131   7
 -11  -8   1 61.0063 4.78343   3
 -11  -8   1 59.3787 5.82909   5
  11   8  -1 64.6284 6.06092   4
 -11   8   1 60.0689 6.62940   7
  11   8  -1 62.9295 5.92594   6
 -10  -8   1 4.24376 2.12543   7
 -10  -8   1 5.89744 2.04155   3
 -10  -8   1 6.75897 2.38462   5
  10   8  -1 7.86788 2.47298   4
 -10   8   1 5.77584 2.69439   7
  10   8  -1 9.37310 2.68614   6
  -9  -8   1 34.4578 5.95818   5
  -9  -8   1 32.9702 3.61862   7
  -9  -8   1 35.1727 3.68710   3
   9   8  -1 35.1955 5.06260   6
  -9   8   1 40.2679 5.84931   7
   9   8  -1 26.4437 4.23346   4
  -8  -8   1 0.96175 1.36671   5
  -8  -8   1 3.49985 1.38409   7
  -8  -8   1 -0.2188 1.25401   3
   8   8  -1 0.67824 1.28960   6
   8   8  -1 -0.3462 1.30843   4
  -8   8   1 2.07329 1.69989   7
  -7  -8   1 -0.0728 1.12284   7
  -7  -8   1 3.35495 1.64032   5
  -7  -8   1 2.60566 1.48762   3
  -7   8   1 1.99308 0.92599   4
  -7   8   1 0.37707 1.09585   6
   7   8  -1 5.11785 1.74275   6
   7   8  -1 5.14105 2.33315   4
  -7   8   1 4.85048 2.38549   7
  -6  -8   1 1.07719 1.40346   5
  -6  -8   1 -2.7292 0.88493   3
   6   8  -1 -0.3658 1.25735   4
  -6   8   1 -1.1673 1.09379   7
  -6   8   1 0.47242 0.84066   4
  -6   8   1 -1.7483 0.82539   6
   5  -8  -1 78.0644 4.02195   4
  -5  -8   1 78.9525 5.47290   3
  -5  -8   1 74.6664 4.85603   7
   5  -8  -1 74.6151 5.84203   3
  -5   8   1 84.6446 6.54682   7
   5   8  -1 69.0035 5.52681   4
  -5   8   1 68.5109 4.70272   6
  -5   8   1 71.1368 4.05823   4
  -4  -8   1 35.5005 3.80634   3
   4  -8  -1 37.2253 4.22423   3
  -4  -8   1 40.1362 3.56795   7
   4  -8  -1 32.3793 2.78133   4
  -4   8   1 38.8095 3.10211   4
  -4   8   1 28.4711 3.97297   6
  -4   8   1 36.7606 4.33675   7
   4   8  -1 37.4003 4.01826   4
   3  -8  -1 48.2004 4.31486   7
  -3  -8   1 62.0328 7.52712   4
   3  -8  -1 48.7915 4.60117   3
   3  -8  -1 48.2041 3.50827   4
  -3  -8   1 48.2359 4.19851   3
  -3  -8   1 49.4706 3.96758   7
  -3  -8   1 49.5462 4.42378   3
   3   8  -1 49.7872 4.47074   4
  -3   8   1 46.7773 3.60610   4
  -3   8   1 52.9322 4.86504   7
  -2  -8   1 527.151 16.7468   3
   2  -8  -1 529.257 17.1465   3
  -2  -8   1 502.093 15.9946   3
  -2  -8   1 530.771 16.0077   7
   2  -8  -1 510.743 15.1988   4
   2  -8  -1 493.319 16.3975   7
  -2  -8   1 507.978 16.3759   4
  -2   8   1 493.666 15.1081   4
   2   8  -1 496.816 16.2609   4
  -2   8   1 525.632 17.3167   7
   1  -8  -1 320.075 11.1811   4
   1  -8  -1 341.663 12.6249   3
   1  -8  -1 305.173 11.7618   7
  -1  -8   1 322.320 11.5303   7
  -1  -8   1 319.670 12.2037   3
  -1  -8   1 301.003 11.4945   4
  -1  -8   1 292.096 11.2822   3
  -1   8   1 323.269 11.1932   4
   1   8  -1 342.170 12.0118   4
   0  -8  -1 63.5757 4.77244   7
   0  -8   1 66.0213 5.27233   4
   0  -8   1 51.6548 4.16683   7
   0  -8  -1 50.7882 4.11383   4
   0  -8  -1 59.4853 4.91765   3
   0  -8   1 50.0548 4.17038   3
   0  -8  -1 51.0386 4.92828   3
   0  -8   1 58.6261 4.83754   3
   0   8  -1 58.0050 4.45910   4
   0   8   1 60.1232 4.38893   4
  -1  -8  -1 32.0545 4.68632   3
   1  -8   1 28.6374 4.26734   7
   1  -8   1 30.4154 3.08499   4
  -1  -8  -1 29.3628 4.01046   3
   1  -8   1 31.0479 3.66071   3
  -1  -8  -1 37.2728 3.63409   4
  -1  -8  -1 30.3483 3.39051   7
   1   8   1 33.0098 3.46669   4
  -1   8  -1 32.0496 3.72871   7
  -1   8  -1 30.2650 3.25161   4
   2  -8   1 170.617 8.50298   3
   2  -8   1 156.203 6.97627   4
   2  -8   1 158.709 7.73226   7
  -2  -8  -1 162.616 8.13679   3
  -2  -8  -1 154.303 7.70525   4
  -2  -8  -1 164.035 7.79518   7
  -2   8  -1 166.539 7.32039   4
  -2   8  -1 160.448 8.30939   7
   2   8   1 153.644 7.72738   4
  -3  -8  -1 557.012 17.4645   3
   3  -8   1 575.216 17.5657   7
  -3  -8  -1 491.901 20.2873   4
   3  -8   1 536.377 15.6413   4
   3  -8   1 579.877 18.3123   3
  -3  -8  -1 558.171 17.1680   7
  -3   8  -1 560.570 16.0299   4
   3   8   1 524.222 17.2590   4
  -3   8  -1 575.598 18.6176   7
   4  -8   1 110.644 6.95852   3
   4  -8   1 104.043 5.09021   4
  -4  -8  -1 107.986 6.17197   7
  -4  -8  -1 114.129 6.51804   3
  -4   8  -1 112.086 7.25504   7
  -4   8  -1 106.389 5.76427   6
   4   8   1 100.471 6.35972   4
  -4   8  -1 101.165 5.37111   4
   5  -8   1 98.4665 6.69347   3
  -5  -8  -1 97.7779 5.88860   7
  -5  -8  -1 94.2811 6.04788   3
   5   8   1 100.452 6.52516   4
  -5   8  -1 100.441 4.92350   4
  -5   8  -1 91.9915 6.95122   7
  -5   8  -1 87.6717 5.20938   6
  -6  -8  -1 5.05671 2.03059   5
  -6  -8  -1 2.46580 1.50984   7
  -6  -8  -1 0.85931 1.46646   3
  -6   8  -1 4.70785 1.98890   7
  -6   8  -1 3.80891 1.32762   4
   6   8   1 4.63649 2.03292   6
   6   8   1 4.95581 2.25545   4
  -6   8  -1 -1.0183 1.25944   6
  -7  -8  -1 61.4385 4.75382   7
  -7  -8  -1 62.8431 4.89642   3
  -7  -8  -1 62.9132 5.13189   5
  -7   8  -1 65.7290 6.14702   7
   7   8   1 57.8012 5.20918   6
  -7   8  -1 59.0702 3.24118   4
   7   8   1 59.6314 5.31149   4
  -8  -8  -1 8.96476 2.40352   5
  -8  -8  -1 8.62166 2.33474   3
  -8   8  -1 13.8790 3.88633   7
  -8   8  -1 11.1825 1.30879   4
   8   8   1 13.0618 3.10504   4
   8   8   1 7.56958 2.22265   6
  -9  -8  -1 17.1913 3.52602   5
  -9  -8  -1 15.6568 2.87144   3
  -9  -8  -1 12.7080 2.60262   7
   9   8   1 13.2189 3.26112   4
   9   8   1 14.2759 2.78004   6
  -9   8  -1 11.5422 3.38647   7
 -10  -8  -1 54.0312 4.88947   7
 -10  -8  -1 66.2363 5.87838   5
 -10  -8  -1 60.0261 4.86632   3
 -10   8  -1 67.2346 6.79713   7
  10   8   1 70.4283 6.03104   6
  10   8   1 69.3719 6.16994   4
 -11  -8  -1 33.3728 4.73269   5
 -11  -8  -1 37.4564 5.17885   3
 -11  -8  -1 34.9565 3.41855   7
  11   8   1 37.8643 5.64590   6
  11   8   1 37.0623 5.41959   4
 -11   8  -1 40.8989 6.20845   7
 -12  -8  -1 40.5558 4.09714   3
 -12  -8  -1 40.9996 3.74708   7
 -12  -8  -1 52.7447 5.70013   5
 -12   8  -1 46.0783 7.03029   7
  12   8   1 50.9464 5.60453   6
  12   8   1 41.1274 5.65448   4
 -13  -8  -1 -1.6639 1.29931   3
 -13  -8  -1 0.03921 2.03001   5
 -13  -8  -1 0.74921 1.43628   7
 -13   8  -1 1.65087 2.65902   7
  13   8   1 0.61248 2.17824   4
  13   8   1 2.31925 2.05550   6
 -14  -8  -1 7.00249 2.27056   3
 -14  -8  -1 11.1938 2.50123   7
 -14  -8  -1 9.64266 3.68753   5
  14   8   1 4.38179 2.64501   6
  14   8   1 7.63163 2.81031   4
 -14   8  -1 15.4025 4.67379   7
 -15  -8  -1 13.1830 3.11605   7
 -15  -8  -1 13.8754 2.70339   3
 -15  -8  -1 15.2453 4.29344   5
 -15   8  -1 10.6324 4.23646   7
  15   8   1 11.0604 3.37095   6
 -14  -9   1 10.4969 4.21321   5
 -14  -9   1 8.40181 2.35850   3
 -14  -9   1 13.5433 2.68253   7
  14   9  -1 9.49958 3.67489   6
 -14   9   1 8.65843 3.68688   7
  14   9  -1 12.0372 3.86700   4
 -13  -9   1 51.2010 4.53637   3
 -13  -9   1 47.1568 3.95793   7
 -13  -9   1 52.6718 6.32951   5
  13   9  -1 53.7334 6.32671   4
 -13   9   1 53.8161 8.79393   7
  13   9  -1 49.1505 6.93556   6
 -12  -9   1 8.48713 1.93167   7
 -12  -9   1 8.35035 2.87762   5
 -12  -9   1 6.48337 2.14663   3
  12   9  -1 13.3429 3.62928   6
  12   9  -1 8.22750 3.39518   4
 -12   9   1 16.4723 4.78532   7
 -11  -9   1 7.50811 5.05028   7
 -11  -9   1 3.25632 1.59041   7
 -11  -9   1 2.63421 1.81379   3
 -11  -9   1 3.24799 2.25864   5
  11   9  -1 6.96494 2.83715   4
 -11   9   1 3.73034 2.48151   7
  11   9  -1 1.06971 2.04562   6
 -10  -9   1 2.84702 2.06454   7
 -10  -9   1 -0.5708 1.72724   5
 -10  -9   1 -0.0339 1.37404   3
  10   9  -1 0.14183 1.95919   6
 -10   9   1 1.94494 2.27039   7
  10   9  -1 1.86919 1.93133   4
  -9  -9   1 14.4917 3.45740   5
  -9  -9   1 22.8739 3.24531   7
  -9  -9   1 17.9066 3.22348   3
  -9   9   1 27.0838 5.09353   7
   9   9  -1 21.5154 4.39962   4
   9   9  -1 23.3019 4.47651   6
  -8  -9   1 155.834 8.87969   5
  -8  -9   1 154.740 9.93266   7
  -8  -9   1 159.381 8.17276   3
   8   9  -1 165.960 9.51310   4
  -8   9   1 150.664 10.1451   7
   8   9  -1 157.531 9.18790   6
  -8   9   1 144.791 4.87427   4
  -7  -9   1 104.840 7.14732   5
   7  -9  -1 104.112 7.58808   3
  -7  -9   1 91.7909 7.43514   7
  -7  -9   1 103.186 6.48956   3
   7   9  -1 89.1662 8.24192   6
  -7   9   1 113.436 4.75087   4
  -6  -9   1 125.351 7.09853   7
   6  -9  -1 143.731 8.63296   3
  -6  -9   1 141.095 7.68941   3
  -6  -9   1 148.537 8.29242   5
   6   9  -1 139.820 8.36350   4
  -6   9   1 138.530 5.95856   4
  -6   9   1 138.162 9.11259   7
   5  -9  -1 6.32767 1.53610   4
  -5  -9   1 7.91701 2.39686   3
   5  -9  -1 10.4484 2.81323   3
  -5  -9   1 8.63188 2.08809   7
  -5   9   1 9.69746 2.05879   4
   5   9  -1 12.0540 2.92085   4
  -5   9   1 10.2337 3.22788   7
  -4  -9   1 198.576 9.40678   3
   4  -9  -1 180.466 7.58374   4
   4  -9  -1 209.479 10.3102   3
  -4  -9   1 175.364 9.72169   7
  -4   9   1 200.684 8.05618   4
   4   9  -1 207.170 9.94280   4
  -4   9   1 206.582 10.6344   7
   3  -9  -1 287.334 12.3507   3
   3  -9  -1 266.961 9.99484   4
  -3  -9   1 269.956 11.5329   3
  -3   9   1 278.948 12.4514   7
   3   9  -1 280.429 11.7469   4
  -3   9   1 279.171 10.3201   4
   2  -9  -1 216.048 9.11197   4
  -2  -9   1 228.713 10.4838   3
   2  -9  -1 225.850 10.6139   3
  -2  -9   1 242.974 9.89711   7
   2   9  -1 222.872 10.1239   4
  -2   9   1 224.358 9.23092   4
   1  -9  -1 35.5845 4.18751   3
  -1  -9   1 42.9469 4.46203   3
  -1  -9   1 31.0044 3.75629   7
   1  -9  -1 36.4753 3.54830   4
  -1   9   1 32.6896 3.47701   4
   1   9  -1 38.1266 3.97199   4
   0  -9  -1 72.6668 5.33649   7
   0  -9  -1 72.1060 5.10052   4
   0  -9   1 65.7902 4.95014   7
   0  -9  -1 75.3749 5.86142   3
   0  -9   1 67.2255 5.08566   4
   0  -9   1 70.1015 5.79547   3
   0   9  -1 71.4432 5.27247   4
   0   9   1 66.1324 4.99684   4
   1  -9   1 7.22603 1.99765   7
  -1  -9  -1 7.92332 2.34702   3
  -1  -9  -1 6.80735 1.95468   7
   1  -9   1 7.87140 2.53143   3
   1  -9   1 10.6137 2.17714   4
   1   9   1 10.5029 2.69006   4
  -1   9  -1 4.23520 1.78464   4
   2  -9   1 34.5557 4.81186   3
  -2  -9  -1 17.7399 3.18187   7
   2  -9   1 25.5635 2.90844   4
  -2  -9  -1 21.3705 3.51993   3
  -2   9  -1 17.0781 3.19527   7
  -2   9  -1 27.5462 3.68996   4
   2   9   1 31.1062 3.76376   4
  -3  -9  -1 11.3495 2.64183   3
  -3  -9  -1 14.5354 2.77365   7
   3  -9   1 9.58568 1.88624   4
   3  -9   1 11.8893 2.98742   3
  -3   9  -1 7.61162 2.48446   7
   3   9   1 9.41260 2.35094   4
  -3   9  -1 12.6363 2.37721   4
   4  -9   1 19.5411 3.68580   3
  -4  -9  -1 24.5741 3.69886   3
  -4  -9  -1 21.8328 3.20639   7
   4  -9   1 19.5267 2.73226   4
  -4   9  -1 27.5724 2.92615   4
  -4   9  -1 26.3811 4.56925   7
   4   9   1 20.7300 3.24828   4
   5  -9   1 8.78585 2.69803   3
  -5  -9  -1 13.2366 2.92008   3
  -5  -9  -1 14.0616 2.70939   7
  -5   9  -1 12.9588 2.26995   4
  -5   9  -1 8.28749 2.62535   7
   5   9   1 11.2178 3.07279   4
  -6  -9  -1 4.93952 2.01160   7
   6  -9   1 8.08341 2.65454   3
  -6  -9  -1 6.08923 2.19593   5
  -6  -9  -1 3.67309 2.01465   3
   6   9   1 5.54308 2.20782   6
   6   9   1 7.18500 2.33374   4
  -6   9  -1 4.50808 2.37282   7
  -6   9  -1 5.66378 1.54817   4
  -7  -9  -1 1.34709 1.63394   5
  -7  -9  -1 1.86918 1.69488   7
   7  -9   1 5.92353 2.51349   3
  -7  -9  -1 1.98941 1.67889   3
   7   9   1 3.13239 3.42413   6
   7   9   1 2.43783 1.87497   4
  -7   9  -1 4.70002 1.28451   4
  -8  -9  -1 55.8050 5.37056   5
  -8  -9  -1 50.2340 4.61188   7
  -8  -9  -1 44.4692 6.06417   3
   8   9   1 52.2682 5.33871   4
   8   9   1 46.7470 5.01546   6
  -8   9  -1 46.3463 6.78331   7
  -8   9  -1 53.5773 2.85567   4
  -9  -9  -1 194.222 11.0654   7
  -9  -9  -1 220.939 9.85835   3
  -9  -9  -1 221.249 10.9512   5
   9   9   1 200.311 10.6417   6
   9   9   1 225.196 11.3686   4
  -9   9  -1 197.985 12.0757   7
 -10  -9  -1 21.6157 4.16673   5
 -10  -9  -1 20.2208 3.51035   3
  10   9   1 27.7142 4.46968   6
  10   9   1 26.8715 4.62014   4
 -10   9  -1 23.3311 5.01908   7
 -11  -9  -1 11.6018 2.34075   7
 -11  -9  -1 12.3847 2.71100   3
 -11  -9  -1 14.7595 3.90751   5
 -11   9  -1 9.98534 3.76519   7
  11   9   1 20.8529 3.92845   4
  11   9   1 9.55942 3.16770   6
 -12  -9  -1 3.39218 2.41470   5
 -12  -9  -1 2.36877 1.76070   3
 -12  -9  -1 2.60899 1.30179   7
 -12   9  -1 -3.5965 1.67762   7
  12   9   1 1.07778 2.09185   6
  12   9   1 3.35806 2.53661   4
 -13  -9  -1 -0.3221 2.12828   5
 -13  -9  -1 5.69053 1.93105   7
 -13  -9  -1 -1.9835 1.71822   3
  13   9   1 1.35242 2.24689   4
  13   9   1 -1.9429 2.90625   6
 -13   9  -1 -1.2914 3.61547   7
 -14  -9  -1 6.46884 2.18941   3
 -14  -9  -1 15.8269 4.25032   5
 -14  -9  -1 7.27036 2.35748   7
  14   9   1 4.90118 2.95035   6
  14   9   1 8.39301 3.11514   4
 -14   9  -1 2.99385 3.16650   7
 -13 -10   1 2.39187 2.71112   5
 -13 -10   1 1.96549 1.93735   3
 -13 -10   1 4.61558 2.09444   7
 -13  10   1 6.38795 3.23885   7
  13  10  -1 1.80713 2.59019   4
  13  10  -1 3.73061 2.76404   6
 -12 -10   1 13.2864 2.94355   3
 -12 -10   1 13.3306 2.45318   7
 -12 -10   1 11.5537 3.78133   5
  12  10  -1 7.38340 2.99493   6
  12  10  -1 13.0200 3.99551   4
 -12  10   1 8.23500 3.34890   7
 -11 -10   1 23.3954 4.86869   5
 -11 -10   1 18.6741 3.35126   3
 -11 -10   1 23.9020 3.04833   7
 -11  10   1 18.6717 4.92208   7
  11  10  -1 16.7758 4.32312   4
  11  10  -1 20.9745 4.48263   6
 -10 -10   1 2.04434 1.53976   3
  10 -10  -1 2.61472 2.18869   3
 -10 -10   1 1.74549 1.97011   5
  10  10  -1 1.20812 1.89800   4
 -10  10   1 -0.9590 1.90678   7
  10  10  -1 3.63549 2.35085   6
   9 -10  -1 39.2451 5.73004   3
  -9 -10   1 40.5535 4.48336   3
  -9 -10   1 53.1644 5.71089   5
   9  10  -1 47.9448 6.37364   4
  -9  10   1 41.4014 6.90606   7
   9  10  -1 45.2820 6.37322   6
  -8 -10   1 24.8359 3.70423   3
   8 -10  -1 29.5754 5.03922   3
  -8 -10   1 25.5008 4.14725   7
  -8 -10   1 22.2712 4.05509   5
   8  10  -1 37.2673 5.92475   6
   8  10  -1 20.3268 4.24238   4
  -8  10   1 16.5282 4.02025   7
  -7 -10   1 9.92618 2.67169   5
   7 -10  -1 5.97933 2.61685   3
  -7 -10   1 8.59485 2.42390   7
  -7 -10   1 8.58783 2.48470   3
  -7  10   1 5.28269 1.55117   4
  -7  10   1 10.2712 3.43847   7
   7  10  -1 5.19437 2.60083   4
   7  10  -1 7.65947 2.51380   6
  -6 -10   1 26.6655 4.19106   3
   6 -10  -1 25.4563 4.56567   3
  -6 -10   1 28.9521 3.97737   7
  -6 -10   1 37.6500 4.58553   5
  -6  10   1 29.3499 4.81649   7
  -6  10   1 40.4692 3.32771   4
   6  10  -1 23.9446 3.92893   4
   5 -10  -1 -0.5054 2.05322   3
  -5 -10   1 1.71248 1.84497   3
   5 -10  -1 0.23583 1.02476   4
  -5 -10   1 -0.3826 1.50739   7
  -5  10   1 1.11841 1.81913   7
   5  10  -1 4.96642 2.12982   4
  -5  10   1 -1.5714 0.94834   4
   4 -10  -1 0.32607 1.04174   4
   4 -10  -1 0.77435 1.87522   3
  -4 -10   1 -1.0197 1.40681   7
  -4 -10   1 0.40985 1.59147   3
  -4  10   1 0.41073 1.15546   4
  -4  10   1 0.67942 1.74333   7
   3 -10  -1 28.0938 3.67111   4
  -3  10   1 30.1363 3.85273   4
   3  10  -1 34.3926 4.98853   4
  -2 -10   1 54.3631 5.59601   3
   2 -10  -1 53.7888 6.37342   3
  -2  10   1 41.8802 4.14099   4
   2  10  -1 56.3097 5.18174   4
   1 -10  -1 140.412 8.69726   3
  -1 -10   1 147.990 8.80843   3
  -1  10   1 125.873 7.25695   4
   1  10  -1 132.727 7.79329   4
   0 -10  -1 2.76555 1.82313   3
   0 -10   1 0.51224 1.46090   3
   0  10  -1 2.33377 1.58945   4
   0  10   1 -0.4744 1.07277   4
  -1 -10  -1 -0.8772 1.20632   3
   1 -10   1 0.44437 1.49513   3
  -1  10  -1 1.88096 1.46094   4
   1  10   1 0.85189 1.41452   4
  -2 -10  -1 143.369 12.6983   3
   2 -10   1 139.534 13.1664   3
  -2  10  -1 149.754 7.73401   4
   2  10   1 142.311 8.26792   4
   3 -10   1 38.5456 6.54041   3
   3 -10   1 35.7541 3.50963   4
  -3 -10  -1 41.5308 6.62028   3
  -3  10  -1 42.5528 5.07911   7
   3  10   1 48.4181 4.89835   4
  -3  10  -1 44.7000 4.09330   4
   4 -10   1 27.0833 4.40206   3
  -4 -10  -1 27.3632 4.36494   3
   4 -10   1 20.1907 2.93300   4
  -4  10  -1 26.9309 5.16977   7
  -4  10  -1 28.3291 3.28570   4
   5 -10   1 90.3285 7.31940   3
  -5 -10  -1 75.7238 6.22720   3
   5  10   1 95.1863 7.20904   4
  -5  10  -1 77.0331 5.00447   4
  -6 -10  -1 115.459 7.76655   5
  -6 -10  -1 121.829 7.69318   3
   6 -10   1 124.003 8.72120   3
  -6  10  -1 120.680 5.96988   4
   6  10   1 126.353 8.30196   4
   6  10   1 110.527 7.86578   6
  -6  10  -1 107.311 8.51488   7
  -7 -10  -1 79.5043 6.10959   3
   7 -10   1 78.3056 7.05939   3
  -7 -10  -1 66.8837 6.06966   5
  -7  10  -1 78.8579 7.45625   7
   7  10   1 81.4640 6.67529   6
   7  10   1 72.9489 6.54218   4
  -8 -10  -1 226.216 11.3258   5
   8 -10   1 231.553 12.3229   3
  -8 -10  -1 232.278 10.7134   3
  -8  10  -1 206.401 12.5963   7
  -8  10  -1 212.306 7.15703   4
   8  10   1 227.530 11.6073   6
   8  10   1 234.206 11.9885   4
  -9 -10  -1 16.4430 3.15068   3
  -9 -10  -1 11.2201 2.99147   5
   9 -10   1 14.5978 3.96163   3
  -9  10  -1 17.0460 4.13048   7
   9  10   1 15.1740 3.81504   4
   9  10   1 17.4345 4.12720   6
 -10 -10  -1 -1.0802 1.63687   5
 -10 -10  -1 0.98433 1.93624   3
  10  10   1 1.45944 2.03173   6
 -10  10  -1 -1.5404 1.91300   7
  10  10   1 1.69824 2.06195   4
 -11 -10  -1 1.22245 2.29129   5
 -11 -10  -1 -2.2612 1.62711   3
  11  10   1 1.71809 2.28923   4
 -11  10  -1 -2.9583 2.47726   7
 -12 -10  -1 11.2022 3.06548   3
 -12 -10  -1 11.4168 3.51783   5
 -12 -10  -1 16.8260 2.75633   7
  12  10   1 11.6150 3.26058   6
  12  10   1 10.7437 3.46790   4
 -12  10  -1 16.8954 5.26612   7
 -13 -10  -1 29.2357 4.06910   3
 -13 -10  -1 32.8116 3.86120   7
 -13 -10  -1 30.2984 5.47961   5
 -13  10  -1 36.9990 6.70704   7
  13  10   1 29.6776 4.95454   6
  13  10   1 25.9020 5.54076   4
 -11 -11   1 43.6961 5.12162   3
 -11 -11   1 52.0092 6.34058   5
 -11 -11   1 45.5602 4.26575   7
  11 -11  -1 54.4023 7.10627   3
  11  11  -1 39.4603 6.07425   6
 -11  11   1 36.5236 7.05327   7
  11  11  -1 48.3624 6.63982   4
 -10 -11   1 74.1625 8.43781   5
 -10 -11   1 63.8057 5.92330   3
  10 -11  -1 76.7693 7.60383   3
  10  11  -1 76.4832 11.5633   6
  10  11  -1 73.3937 7.59726   4
   9 -11  -1 7.18955 3.26552   3
  -9 -11   1 13.4524 3.16933   3
  -9  11   1 14.9450 4.24636   7
   9  11  -1 14.5404 3.65208   6
   9  11  -1 8.82949 3.46894   4
  -8 -11   1 6.35158 2.36657   3
   8 -11  -1 2.88461 2.31176   3
  -8 -11   1 5.16550 2.55508   5
  -8  11   1 4.00542 3.19046   7
   8  11  -1 5.74660 3.14275   6
   8  11  -1 3.07261 2.28802   4
  -7 -11   1 0.60676 1.76732   3
   7 -11  -1 -1.2869 1.71282   3
  -7 -11   1 2.28592 2.14630   5
   7  11  -1 -1.6119 1.87707   4
  -7  11   1 0.35393 1.73633   7
  -7  11   1 -0.9821 1.17377   4
   7  11  -1 0.86416 1.92509   6
  -6 -11   1 36.9837 5.44833   5
  -6 -11   1 30.9037 4.62044   3
   6 -11  -1 33.6928 5.57428   3
  -6  11   1 30.0633 3.35680   4
  -6  11   1 37.5877 6.03554   7
   6  11  -1 29.3688 5.27051   4
   6  11  -1 35.1148 5.55368   6
  -5 -11   1 33.5781 5.07105   5
   5 -11  -1 32.0253 5.37229   3
  -5 -11   1 30.7608 4.66379   3
   5  11  -1 37.2307 5.04601   4
  -5  11   1 47.3755 6.47511   7
  -5  11   1 39.9805 3.81962   4
   4 -11  -1 43.2190 6.04492   3
  -4 -11   1 54.1784 5.64016   3
   4  11  -1 58.4817 5.78612   4
  -4  11   1 48.5396 4.38882   4
   3 -11  -1 134.579 9.00929   3
  -3 -11   1 130.239 8.53890   3
  -3  11   1 144.991 7.64076   4
   3  11  -1 124.187 8.43667   4
  -2 -11   1 0.12289 1.72162   3
   2 -11  -1 -2.1185 1.39353   3
   2  11  -1 -0.6162 1.39209   4
  -2  11   1 3.67765 1.58789   4
  -1 -11   1 14.7428 3.68539   3
   1 -11  -1 17.0702 3.67729   3
  -1  11   1 14.8775 2.95775   4
   0 -11  -1 19.7463 3.92653   3
   0 -11   1 15.2748 3.46012   3
   0  11   1 14.5846 3.28939   4
   0  11  -1 19.6468 3.57516   4
  -1 -11  -1 97.8713 7.34415   3
   1 -11   1 102.909 7.83579   3
  -1  11  -1 95.0677 6.67106   4
   2 -11   1 67.4564 6.37244   3
  -2 -11  -1 66.0801 6.26977   3
   2  11   1 60.7360 5.65437   4
  -2  11  -1 63.4999 5.35480   4
  -3 -11  -1 116.866 8.01217   3
   3 -11   1 101.355 7.88182   3
   3  11   1 101.076 7.40597   4
  -3  11  -1 117.763 6.86409   4
   4 -11   1 21.1472 4.19128   3
  -4 -11  -1 21.4002 4.00373   3
  -4  11  -1 28.3224 3.88131   4
   4  11   1 19.0910 3.89327   4
  -5 -11  -1 98.8947 7.37919   3
   5 -11   1 101.860 8.24227   3
  -5  11  -1 99.1429 5.94578   4
   5  11   1 108.400 7.85728   4
  -5  11  -1 87.3634 7.78519   7
  -6 -11  -1 125.713 8.50608   5
  -6 -11  -1 109.893 7.66203   3
   6 -11   1 112.268 8.91991   3
   6  11   1 115.227 8.51191   4
  -6  11  -1 109.089 6.00916   4
  -6  11  -1 104.760 8.77415   7
   6  11   1 115.549 8.28930   6
  -7 -11  -1 128.733 8.25953   3
   7 -11   1 128.304 9.65897   3
  -7 -11  -1 116.765 8.49587   5
   7  11   1 126.651 9.02244   4
   7  11   1 130.744 8.92500   6
  -7  11  -1 129.676 9.89910   7
  -7  11  -1 110.506 5.67964   4
  -8 -11  -1 87.8823 7.32831   5
   8 -11   1 68.9081 7.38727   3
  -8 -11  -1 68.0751 6.15333   3
  -8  11  -1 65.9918 3.87824   4
   8  11   1 89.6080 7.85088   4
  -8  11  -1 68.1063 7.62601   7
   8  11   1 78.3212 7.00048   6
  -9 -11  -1 61.4547 5.82730   3
   9 -11   1 68.0749 7.27925   3
  -9 -11  -1 62.9493 6.52980   5
   9  11   1 52.1511 6.14078   6
   9  11   1 61.7902 6.79395   4
  -9  11  -1 47.2347 6.73624   7
  10 -11   1 1.27248 2.58600   3
 -10 -11  -1 1.88994 2.36183   3
 -10 -11  -1 4.72754 2.84668   5
 -10  11  -1 11.6548 6.27417   7
  10  11   1 1.20511 2.47731   4
  10  11   1 -0.2265 2.61102   6
 -11 -11  -1 19.5768 3.82499   3
  11 -11   1 14.8944 4.19588   3
 -11 -11  -1 18.8197 4.36250   5
  11  11   1 20.7268 4.42149   4
 -11  11  -1 26.2600 5.10366   7
  11  11   1 25.2451 5.04230   6
  -9 -12   1 21.1589 4.21091   5
   9 -12  -1 36.3904 6.36039   3
   9  12  -1 21.4007 4.73099   6
  -9  12   1 12.4460 4.07417   7
   9  12  -1 16.3023 4.23340   4
  -8 -12   1 41.9800 6.48438   5
  -8 -12   1 53.6061 5.74789   3
   8 -12  -1 58.3871 8.31508   3
   8  12  -1 54.9570 6.25371   6
  -8  12   1 40.5611 8.22814   7
   8  12  -1 45.4793 6.23879   4
  -7 -12   1 34.7910 9.49863   5
   7 -12  -1 25.6735 5.07150   3
  -7 -12   1 22.6060 4.42533   3
  -7  12   1 23.8462 4.83691   7
  -7  12   1 25.0422 3.15654   4
   7  12  -1 10.6074 3.66842   6
   7  12  -1 24.6004 4.57397   4
  -6 -12   1 85.9276 7.45757   5
  -6 -12   1 82.5704 7.03025   3
   6 -12  -1 63.6650 7.44168   3
  -6  12   1 67.2303 4.99899   4
   6  12  -1 81.8266 7.52172   6
   6  12  -1 79.1551 7.38374   4
  -5 -12   1 128.382 8.99733   5
  -5 -12   1 124.499 8.63556   3
   5 -12  -1 116.065 9.27885   3
  -5  12   1 118.427 6.73220   4
   5  12  -1 124.550 8.92916   4
   4 -12  -1 66.0213 6.72794   3
  -4 -12   1 50.7408 5.99756   3
  -4  12   1 42.1094 4.43186   4
   4  12  -1 39.4862 5.59586   4
   3 -12  -1 233.779 13.0198   3
  -3 -12   1 240.108 12.4521   3
   3  12  -1 238.305 12.3604   4
  -3  12   1 246.121 10.8104   4
  -2 -12   1 343.288 15.1314   3
   2 -12  -1 314.017 15.0348   3
  -2  12   1 322.117 15.3828   4
   2  12  -1 309.741 14.1714   4
   1 -12  -1 144.647 9.69565   3
  -1 -12   1 115.855 8.84799   3
   1  12  -1 123.160 8.27600   4
  -1  12   1 126.684 7.98211   4
   0 -12   1 109.951 8.58206   3
   0 -12  -1 103.419 8.34828   3
   0  12   1 98.0506 7.20692   4
   0  12  -1 127.094 8.05439   4
   1 -12   1 8.50972 3.36986   3
  -1 -12  -1 0.47660 2.02952   3
  -1  12  -1 4.04415 2.23445   4
   1  12   1 1.48598 2.08323   4
   2 -12   1 26.6597 4.87932   3
  -2 -12  -1 21.6302 4.48661   3
  -2  12  -1 26.9000 4.05657   4
   2  12   1 22.7477 4.39233   4
  -3 -12  -1 150.261 9.75611   3
   3 -12   1 160.231 10.3750   3
   3  12   1 156.676 9.68460   4
  -3  12  -1 160.216 8.60507   4
   4 -12   1 18.5375 4.32309   3
  -4 -12  -1 14.2393 3.67313   3
  -4  12  -1 20.6037 3.56320   4
   4  12   1 11.1215 2.99151   4
   5 -12   1 2.41134 2.66133   3
  -5 -12  -1 -0.2768 1.99416   3
  -5 -12  -1 -4.0934 1.38817   5
   5  12   1 4.29869 2.28028   4
  -5  12  -1 4.65908 1.64379   4
   5  12   1 0.72105 1.87626   6
  -6 -12  -1 14.2994 3.72528   5
   6 -12   1 10.4598 3.69283   3
  -6 -12  -1 17.7416 3.86999   3
  -6  12  -1 9.45747 3.37434   7
   6  12   1 14.9551 3.65875   4
   6  12   1 12.3376 3.31891   6
  -6  12  -1 16.6131 2.64385   4
  -7 -12  -1 12.4952 3.25221   3
  -7 -12  -1 19.1587 7.03494   5
   7 -12   1 9.72221 4.09145   3
  -7  12  -1 3.95192 3.19304   7
  -7  12  -1 12.7226 2.70832   4
   7  12   1 11.7399 3.91016   4
   7  12   1 7.80656 2.93518   6
  -8 -12  -1 -0.7140 2.34378   3
  -8 -12  -1 3.33647 2.44075   5
   8 -12   1 -1.8496 2.60195   3
  -8  12  -1 5.88419 3.27548   7
   8  12   1 0.80966 2.10604   6
   8  12   1 2.52595 2.70197   4
   9 -12   1 40.3675 6.79473   3
  -9 -12  -1 35.4340 5.01979   3
  -9 -12  -1 35.7315 5.98894   5
   9  12   1 26.3564 5.01922   6
   9  12   1 26.1861 5.10494   4
  -9  12  -1 38.2945 6.42753   7
  -6 -13   1 0.88487 2.26407   5
   6 -13  -1 3.08358 3.20026   3
  -6 -13   1 -0.0672 2.21223   3
   6  13  -1 -3.3209 2.07236   4
  -6  13   1 4.37668 2.38646   4
   6  13  -1 1.17250 2.82990   6
  -5 -13   1 0.00626 2.01975   3
  -5 -13   1 0.11853 1.81280   5
   5 -13  -1 1.05590 2.36695   3
   5  13  -1 -2.9076 1.99668   4
   5  13  -1 1.29191 2.11109   6
   4 -13  -1 20.5697 4.62065   3
  -4 -13   1 14.0396 3.67969   3
  -4  13   1 18.0794 3.14489   4
   4  13  -1 14.2232 4.91575   4
  -3 -13   1 110.575 10.6877   3
   3 -13  -1 117.357 9.31626   3
   3  13  -1 111.651 8.65102   4
  -3  13   1 104.606 7.11871   4
   2 -13  -1 35.0830 6.93916   3
   2  13  -1 52.1087 6.12089   4
  -2  13   1 48.8607 5.16900   4
  -1  13   1 1.20941 2.07362   4
   1  13  -1 1.91841 2.44445   4
   0  13  -1 -0.9505 1.69311   4
   0  13   1 2.32008 2.01915   4
   1  13   1 11.4367 3.45781   4
  -1  13  -1 15.2230 3.54581   4
  -2 -13  -1 84.1685 12.7490   3
   2 -13   1 79.5502 8.70133   3
  -2  13  -1 75.7381 6.36825   4
   2  13   1 70.6861 6.83754   4
  -3 -13  -1 3.91895 2.87599   3
   3 -13   1 0.00499 2.49530   3
  -3  13  -1 1.05483 1.81438   4
   3  13   1 4.15310 2.72275   4
   4 -13   1 6.64317 3.28770   3
  -4 -13  -1 0.45612 2.17400   3
  -4  13  -1 2.46651 1.78995   4
   4  13   1 -0.5978 2.44514   6
   4  13   1 3.05225 3.18312   4
  -5 -13  -1 5.73227 2.76403   5
  -5 -13  -1 9.01905 3.06972   3
   5 -13   1 4.06939 3.37355   3
  -5  13  -1 8.01925 3.29121   4
   5  13   1 1.04170 2.12890   4
   5  13   1 2.11507 2.40286   6
  -6 -13  -1 12.9169 3.30548   3
   6 -13   1 9.52873 3.71727   3
  -6 -13  -1 15.0161 3.75230   5
  -6  13  -1 9.30137 2.80889   4
   6  13   1 13.0327 3.62400   6
   6  13   1 13.8202 4.14053   4
  19   0  -2 71.7284 7.00536   6
 -19   0   2 86.2444 8.09990   7
  18   0  -2 49.1716 5.46104   6
 -18   0   2 47.7245 5.71479   7
 -17   0   2 180.585 11.4071   5
  17   0  -2 153.117 8.73144   6
 -17   0   2 145.959 9.59217   7
 -16   0   2 266.934 13.0161   7
 -16   0   2 264.305 9.21358   4
  16   0  -2 274.975 11.7264   6
 -16   0   2 277.567 14.2083   5
  15   0  -2 260.255 11.1383   6
 -15   0   2 276.893 13.6448   5
 -15   0   2 272.550 12.2550   7
 -15   0   2 249.091 8.89283   4
 -14   0   2 216.305 11.6687   5
  14   0  -2 244.943 10.2573   6
 -14   0   2 223.453 8.20880   4
 -14   0   2 231.115 6.98045   3
 -14   0   2 252.850 11.1860   7
 -13   0   2 493.037 16.4767   7
 -13   0   2 461.512 17.5581   5
 -13   0   2 459.451 13.3372   4
  13   0  -2 474.250 15.4005   6
 -13   0   2 471.945 12.2870   3
  12   0  -2 1.32632 0.87918   3
 -12   0   2 0.62937 1.20859   7
 -12   0   2 0.48996 0.99659   6
 -12   0   2 -0.6686 1.23223   5
 -12   0   2 1.90854 1.02979   4
 -12   0   2 0.33806 0.77269   3
  12   0  -2 0.08707 1.09500   6
 -11   0   2 341.526 9.45196   3
 -11   0   2 349.211 12.1475   7
  11   0  -2 319.031 10.5122   3
  11   0  -2 343.526 9.92705   4
  11   0  -2 343.603 12.1434   5
  11   0  -2 353.757 11.6408   6
 -11   0   2 320.210 13.1027   5
  10   0  -2 1966.55 45.0021   6
 -10   0   2 1905.62 45.3987   6
 -10   0   2 2014.34 42.7282   3
 -10   0   2 1943.14 43.3915   4
  10   0  -2 2000.11 46.1840   5
 -10   0   2 1990.04 45.6853   7
  10   0  -2 1953.97 43.0995   4
  10   0  -2 1962.36 44.2157   7
  10   0  -2 1901.27 43.8004   3
 -10   0   2 1918.87 47.4901   5
  -9   0   2 845.049 20.1209   4
   9   0  -2 804.499 20.5835   7
  -9   0   2 823.712 23.3315   5
   9   0  -2 847.894 20.4545   3
   9   0  -2 866.188 19.9035   4
   9   0  -2 836.145 22.1445   5
  -9   0   2 824.648 21.7338   7
  -9   0   2 858.877 19.5427   3
  -9   0   2 836.402 21.7148   6
  -8   0   2 327.078 10.1026   7
   8   0  -2 309.696 9.23530   7
   8   0  -2 316.770 9.77650   6
   8   0  -2 313.046 10.4080   5
   8   0  -2 314.146 8.62136   4
  -8   0   2 320.455 8.88868   4
  -8   0   2 318.995 8.44088   3
   8   0  -2 310.871 8.95099   3
  -8   0   2 309.158 9.89855   6
   7   0  -2 1455.44 33.2753   6
  -7   0   2 1438.10 33.4446   6
   7   0  -2 1467.76 32.0958   4
  -7   0   2 1521.27 33.6686   7
   7   0  -2 1478.03 34.2731   5
   7   0  -2 1420.55 32.8092   7
   7   0  -2 1469.76 32.3883   3
  -7   0   2 1461.32 32.3169   4
  -7   0   2 1476.75 31.8232   3
  -7   0   2 1450.88 35.0499   5
   6   0  -2 168.010 5.41239   7
  -6   0   2 165.591 5.81754   6
  -6   0   2 181.303 5.94504   7
   6   0  -2 170.493 5.15085   3
   6   0  -2 169.502 5.73041   6
  -6   0   2 163.436 4.77576   3
  -6   0   2 163.940 6.63932   5
   6   0  -2 165.515 5.03915   4
  -6   0   2 170.762 5.18928   4
  -5   0   2 104.329 3.46486   4
   5   0  -2 103.718 3.38204   4
  -5   0   2 99.0288 3.84407   7
   5   0  -2 103.756 3.39213   3
  -5   0   2 99.9738 3.12285   3
   5   0  -2 100.239 4.30730   5
   5   0  -2 99.6936 3.82318   6
   5   0  -2 104.798 3.66160   7
  -5   0   2 100.606 3.90238   6
  -4   0   2 2590.48 55.1897   6
   4   0  -2 2622.10 54.4475   3
   4   0  -2 2576.88 54.5370   4
  -4   0   2 2618.55 55.1660   7
  -4   0   2 2603.02 54.6216   4
   4   0  -2 2755.67 54.9709   7
   4   0  -2 2539.35 55.0588   6
   4   0  -2 2563.74 55.8930   5
  -4   0   2 2554.74 56.1934   5
  -3   0   2 5.75774 0.62044   4
   3   0  -2 5.69912 0.53047   3
   3   0  -2 5.77286 0.61708   4
  -3   0   2 6.38176 0.74712   6
   3   0  -2 7.36267 0.72464   7
   3   0  -2 6.26867 0.71466   6
  -3   0   2 6.50381 0.50442   3
  -3   0   2 6.80951 0.76342   7
  -2   0   2 1130.88 24.4832   6
   2   0  -2 1229.97 25.5834   5
   2   0  -2 1165.82 24.4506   7
  -2   0   2 1114.30 25.0899   5
   2   0  -2 1156.06 24.3640   4
   2   0  -2 1147.04 24.4707   6
  -2   0   2 1146.08 24.5351   7
  -2   0   2 1145.55 24.3626   4
   1   0  -2 -0.0080 0.05473   7
  -2   0  -2 519.197 12.1301   7
   2   0   2 542.162 12.0446   3
  -2   0  -2 528.636 12.1931   6
  -2   0  -2 547.131 12.1555   5
   2   0   2 528.218 12.0458   5
   2   0   2 533.657 12.1957   6
  -2   0  -2 534.652 12.0210   3
  -2   0  -2 547.613 12.0253   4
   3   0   2 1103.40 23.6035   4
  -3   0  -2 1099.24 23.9530   7
   3   0   2 1059.01 23.9621   6
   3   0   2 1094.01 23.9756   5
  -3   0  -2 1090.20 23.6733   3
   3   0   2 1092.63 23.6927   3
  -3   0  -2 1040.44 23.9611   6
  -3   0  -2 1094.01 24.1301   5
  -3   0  -2 1103.24 23.5841   4
   4   0   2 1223.29 28.1853   7
  -4   0  -2 1311.64 27.9349   4
  -4   0  -2 1308.43 28.5030   7
   4   0   2 1255.74 28.4663   6
   4   0   2 1328.62 27.9348   4
  -4   0  -2 1251.24 28.5197   6
  -4   0  -2 1246.95 28.7730   5
   4   0   2 1307.80 28.5763   5
  -4   0  -2 1312.51 28.0718   3
   4   0   2 1270.53 28.0747   3
   5   0   2 2675.50 57.8965   5
   5   0   2 2700.19 57.4906   7
  -5   0  -2 2740.69 57.8596   7
  -5   0  -2 2630.31 58.2970   5
  -5   0  -2 2764.68 57.2289   3
   5   0   2 2726.96 56.9977   4
  -5   0  -2 2674.98 56.9999   4
   5   0   2 2608.01 57.2017   3
   5   0   2 2687.62 57.8262   6
  -5   0  -2 2660.43 57.8973   6
  -6   0  -2 8.63672 1.27200   3
   6   0   2 10.2608 1.78563   7
  -6   0  -2 10.9169 1.21915   4
   6   0   2 10.9016 1.78500   5
   6   0   2 10.1086 1.73473   6
  -6   0  -2 8.69143 1.28923   7
  -6   0  -2 13.0772 2.12715   5
  -6   0  -2 10.5764 1.72637   6
   6   0   2 9.80885 1.33222   4
  -7   0  -2 9.69526 1.53636   7
   7   0   2 8.60556 1.28368   4
  -7   0  -2 8.76392 1.33324   3
   7   0   2 9.91019 1.73234   5
  -7   0  -2 8.32530 1.34585   4
  -7   0  -2 8.78074 1.76669   5
  -7   0  -2 8.94706 1.53413   6
   7   0   2 10.0299 1.78593   6
   7   0   2 8.05043 1.31806   3
  -8   0  -2 2205.45 49.3424   6
   8   0   2 2201.30 49.1489   5
  -8   0  -2 2202.99 50.3009   5
   8   0   2 2115.06 48.0972   3
  -8   0  -2 2182.87 49.2737   7
  -8   0  -2 2221.98 47.8961   3
   8   0   2 2120.51 49.1794   6
  -8   0  -2 2186.10 47.7744   4
  -9   0  -2 1348.20 33.6096   5
   9   0   2 1291.07 31.1721   3
  -9   0  -2 1329.57 30.8169   4
   9   0   2 1314.23 32.0319   6
  -9   0  -2 1368.80 32.6285   6
  -9   0  -2 1366.52 30.9425   3
   9   0   2 1383.01 32.4795   5
  -9   0  -2 1284.92 32.3432   7
  10   0   2 1923.77 44.4698   6
 -10   0  -2 1897.39 44.8911   7
 -10   0  -2 1915.55 44.8714   6
 -10   0  -2 1940.42 43.4803   3
  10   0   2 1867.82 44.3617   5
 -10   0  -2 1895.05 42.7723   4
  10   0   2 1854.88 43.3117   3
 -10   0  -2 1899.20 46.0394   5
  11   0   2 775.644 21.0286   3
  11   0   2 817.490 22.1088   6
 -11   0  -2 808.403 20.4491   4
  11   0   2 796.233 22.1162   5
 -11   0  -2 786.324 22.3684   6
 -11   0  -2 801.581 23.6226   5
 -11   0  -2 795.343 22.6155   7
 -11   0  -2 818.635 20.3956   3
 -12   0  -2 18.8053 2.53978   4
 -12   0  -2 15.0109 2.73567   7
 -12   0  -2 13.9866 3.38329   5
  12   0   2 15.4070 2.98988   6
 -12   0  -2 22.7609 2.55310   3
 -13   0  -2 132.655 7.78691   7
 -13   0  -2 142.525 8.60672   5
  13   0   2 127.582 7.26136   6
 -13   0  -2 146.316 6.34854   4
 -13   0  -2 137.093 6.08598   3
 -14   0  -2 3.53977 2.06457   5
 -14   0  -2 4.70433 1.54667   3
  14   0   2 8.20527 2.68421   6
 -14   0  -2 4.03733 1.46698   4
 -14   0  -2 6.58780 2.43002   7
 -15   0  -2 130.856 8.91016   5
 -15   0  -2 128.371 8.38325   7
 -15   0  -2 128.801 6.07199   3
  15   0   2 132.490 7.87145   6
 -15   0  -2 122.204 6.05735   4
 -16   0  -2 36.9972 3.24274   3
  16   0   2 31.1017 4.29977   6
 -16   0  -2 26.8317 3.33785   4
 -16   0  -2 30.1448 4.67129   7
 -16   0  -2 38.7537 6.02870   5
 -17   0  -2 1.17834 1.72939   5
 -17   0  -2 -3.5439 1.37078   7
 -17   0  -2 -0.8694 1.22501   3
  17   0   2 -2.3441 1.56380   6
  18   0   2 6.95961 2.35554   6
 -18   0  -2 10.8586 3.32349   7
  19   0   2 13.3935 3.55892   6
 -19   0  -2 13.5741 4.09656   7
 -19  -1   2 70.8306 6.99920   7
 -19  -1   2 86.0290 8.34859   5
  19  -1  -2 81.6731 6.86455   6
 -19   1   2 86.7482 8.34999   7
  19   1  -2 70.2789 9.76078   6
 -18  -1   2 38.9138 6.51000   5
  18  -1  -2 34.5266 4.85079   6
 -18  -1   2 31.6953 5.18917   7
  18   1  -2 34.0372 4.97432   6
 -18   1   2 33.6416 5.75715   7
 -17  -1   2 65.0855 6.03453   7
  17  -1  -2 67.2766 5.59145   6
 -17  -1   2 47.9722 7.06058   5
  17   1  -2 51.5411 5.16890   6
 -17   1   2 52.7239 6.12991   7
 -16  -1   2 40.6395 4.84292   7
 -16  -1   2 35.4961 5.80087   5
 -16  -1   2 39.3324 6.23054   4
  16  -1  -2 41.9888 4.43796   6
 -16   1   2 44.6065 6.38816   7
  16   1  -2 41.5182 4.47948   6
 -15  -1   2 38.4094 4.43674   7
 -15  -1   2 40.6939 6.17254   5
  15  -1  -2 44.4855 4.41271   6
 -15  -1   2 40.3832 3.78969   4
 -15  -1   2 47.0039 2.54418   3
 -15   1   2 49.3456 5.81632   5
 -15   1   2 47.5275 6.35430   7
 -15   1   2 45.6488 2.61618   4
 -14  -1   2 11.0521 2.72640   7
 -14  -1   2 13.8589 2.34010   4
 -14  -1   2 15.0123 3.35797   5
 -14  -1   2 15.5351 1.81597   3
  14  -1  -2 16.9376 3.04857   6
  14   1  -2 18.4309 2.67000   4
 -14   1   2 14.0573 1.78492   4
 -14   1   2 14.9434 3.79548   5
  14   1  -2 12.0168 2.54636   6
 -14   1   2 9.31188 2.60659   7
  13  -1  -2 125.016 6.71456   6
 -13  -1   2 123.201 8.04443   5
 -13  -1   2 108.402 5.70094   4
 -13  -1   2 116.796 6.77749   7
 -13  -1   2 113.328 4.65775   3
 -13   1   2 114.484 4.42243   3
  13   1  -2 122.335 5.69589   4
  13   1  -2 113.617 6.52515   6
 -13   1   2 112.283 4.50374   4
 -13   1   2 110.913 7.81992   5
 -13   1   2 119.411 7.45365   7
  12  -1  -2 348.824 11.5818   7
 -12  -1   2 345.121 12.3120   7
 -12  -1   2 348.288 9.83340   3
  12  -1  -2 343.581 11.9968   6
  12  -1  -2 335.002 11.0059   3
 -12  -1   2 349.569 11.3323   4
 -12  -1   2 352.343 14.0991   5
 -12   1   2 363.646 12.5617   6
  12   1  -2 351.281 12.2691   6
 -12   1   2 347.028 9.61986   4
 -12   1   2 351.232 13.2415   7
 -12   1   2 344.195 14.2306   5
  12   1  -2 352.347 10.9520   4
 -12   1   2 351.003 9.63744   3
  12   1  -2 318.360 11.2627   3
 -11  -1   2 366.957 13.0219   6
 -11  -1   2 382.884 10.3506   3
 -11  -1   2 399.700 12.7537   7
 -11  -1   2 390.448 11.7498   4
  11  -1  -2 359.600 11.2288   3
  11  -1  -2 384.192 13.3290   5
  11  -1  -2 367.647 11.8808   7
  11  -1  -2 373.496 12.2274   6
 -11  -1   2 375.027 14.1593   5
  11   1  -2 369.244 12.8162   5
 -11   1   2 375.119 10.0369   4
 -11   1   2 378.590 12.5681   6
 -11   1   2 370.258 10.1730   3
  11   1  -2 399.274 11.4676   4
 -11   1   2 344.740 14.0480   5
 -11   1   2 367.510 13.2585   7
  11   1  -2 353.564 11.5905   3
  11   1  -2 382.180 12.5187   6
 -10  -1   2 37.8962 3.29160   7
 -10  -1   2 37.9240 3.42998   6
 -10  -1   2 40.7934 2.53989   3
 -10  -1   2 39.9257 4.05936   5
  10  -1  -2 42.7082 3.78982   5
  10  -1  -2 35.7689 2.97228   7
  10  -1  -2 39.5354 2.84996   3
  10  -1  -2 36.6532 3.25604   6
 -10  -1   2 37.4374 2.95169   4
  10   1  -2 39.2262 2.87623   4
  10   1  -2 35.9246 2.94515   3
  10   1  -2 45.8352 4.27520   5
 -10   1   2 37.1770 2.20831   4
 -10   1   2 37.3370 3.60045   7
 -10   1   2 44.1015 2.52943   3
 -10   1   2 40.7538 3.34986   6
 -10   1   2 41.1006 4.21256   5
  10   1  -2 45.0213 3.55607   6
   9  -1  -2 99.3421 4.35121   3
  -9  -1   2 97.7665 5.24473   6
  -9  -1   2 99.1011 4.66968   4
  -9  -1   2 103.843 6.02967   5
   9  -1  -2 102.276 5.59725   5
   9  -1  -2 102.453 4.79524   7
  -9  -1   2 107.472 4.08292   3
  -9  -1   2 108.080 5.08060   7
   9  -1  -2 103.323 5.02151   6
   9   1  -2 102.382 4.56662   4
   9   1  -2 106.993 5.48706   5
   9   1  -2 104.173 5.17638   6
  -9   1   2 101.625 3.95197   3
  -9   1   2 102.923 3.73029   4
   9   1  -2 95.9258 4.55966   3
  -9   1   2 102.549 6.23932   5
  -9   1   2 100.263 5.03931   6
  -8  -1   2 2.28083 0.78088   3
  -8  -1   2 2.25792 1.00566   6
   8  -1  -2 1.78509 0.86415   7
  -8  -1   2 0.87300 0.64820   4
   8  -1  -2 3.51105 1.09271   5
  -8  -1   2 0.94120 0.75340   7
   8  -1  -2 2.33382 0.83948   3
   8  -1  -2 2.03300 0.93668   6
  -8   1   2 2.37852 1.30033   7
  -8   1   2 1.71061 0.58230   4
  -8   1   2 1.52266 0.90983   6
   8   1  -2 1.04741 0.77469   6
   8   1  -2 2.55143 0.89623   3
   8   1  -2 1.88070 0.82207   4
  -8   1   2 4.57296 1.80264   5
   8   1  -2 2.07115 1.12825   5
  -8   1   2 1.52080 0.71234   3
   7  -1  -2 103.297 4.42549   7
   7  -1  -2 100.813 3.86974   3
  -7  -1   2 98.4974 5.17664   5
   7  -1  -2 101.502 5.09064   5
  -7  -1   2 108.368 4.40306   7
  -7  -1   2 101.442 3.70822   3
  -7  -1   2 103.701 4.38808   4
   7  -1  -2 104.136 4.46737   6
  -7  -1   2 98.2879 4.67971   6
   7  -1  -2 105.724 3.30803   4
  -7   1   2 101.035 3.33672   4
   7   1  -2 105.965 4.25628   4
  -7   1   2 106.001 3.68807   3
   7   1  -2 104.409 4.82466   3
   7   1  -2 100.375 4.58548   6
  -7   1   2 112.821 5.13375   7
  -7   1   2 101.052 4.48658   6
   7   1  -2 119.334 5.18092   5
  -6  -1   2 706.978 17.1190   7
  -6  -1   2 717.066 18.6742   5
   6  -1  -2 736.012 17.4899   6
   6  -1  -2 735.760 15.8490   4
  -6  -1   2 748.218 16.5804   3
   6  -1  -2 742.887 17.6004   7
   6  -1  -2 714.259 16.6275   3
  -6  -1   2 703.558 19.1184   6
  -6  -1   2 731.011 17.5071   4
   6  -1  -2 712.609 18.6036   5
   6   1  -2 701.108 17.6777   6
   6   1  -2 719.711 17.0327   3
  -6   1   2 722.489 15.9280   4
   6   1  -2 703.298 17.2292   4
  -6   1   2 692.151 19.0043   5
  -6   1   2 706.886 18.1903   7
  -6   1   2 712.201 17.4598   6
  -6   1   2 725.688 16.4255   3
   6   1  -2 775.876 18.4345   5
   5  -1  -2 3100.84 65.4490   3
  -5  -1   2 3189.33 66.4038   4
   5  -1  -2 3153.94 66.5024   7
  -5  -1   2 3036.22 65.7783   7
   5  -1  -2 3159.37 64.6192   4
  -5  -1   2 3042.34 66.7939   6
   5  -1  -2 3185.08 66.1926   6
  -5  -1   2 3126.13 65.3704   3
  -5  -1   2 3129.66 67.3837   5
   5  -1  -2 3169.97 67.5519   5
  -5   1   2 3140.81 65.2547   3
  -5   1   2 3078.13 66.9883   7
   5   1  -2 3125.85 66.6021   6
   5   1  -2 3115.53 65.8155   3
  -5   1   2 3073.42 66.1093   6
   5   1  -2 3104.34 66.2126   4
  -5   1   2 3148.57 64.6969   4
   5   1  -2 3078.35 66.9090   5
  -4  -1   2 2006.07 41.9584   4
  -4  -1   2 1943.21 41.1724   7
   4  -1  -2 1990.49 41.0449   3
  -4  -1   2 1948.66 42.5322   5
   4  -1  -2 1971.31 42.0251   7
   4  -1  -2 1965.81 41.5227   6
   4  -1  -2 1921.06 42.7580   5
  -4  -1   2 1941.54 40.9981   3
   4  -1  -2 2002.40 40.2074   4
   4   1  -2 1948.74 41.3150   3
   4   1  -2 1861.48 42.1343   5
  -4   1   2 1992.71 40.8969   3
  -4   1   2 1942.10 42.3422   7
   4   1  -2 1918.83 41.7838   4
   4   1  -2 1876.87 41.9272   6
  -4   1   2 1945.00 41.5077   6
  -4   1   2 1836.15 40.4423   4
   3  -1  -2 109.971 4.18157   5
   3  -1  -2 120.298 3.29791   3
  -3  -1   2 114.014 4.00561   5
   3  -1  -2 113.922 3.43336   6
  -3  -1   2 115.541 3.26444   3
  -3  -1   2 114.079 3.80382   4
  -3  -1   2 120.320 3.22748   7
   3  -1  -2 103.214 3.78578   7
  -3   1   2 122.095 3.19475   3
   3   1  -2 116.897 3.82062   4
  -3   1   2 121.576 4.11363   7
  -3   1   2 114.880 3.44487   6
   3   1  -2 115.184 3.91998   5
   3   1  -2 117.507 3.88411   6
   3   1  -2 116.355 3.41818   3
   2  -1  -2 388.270 8.73354   3
   2  -1  -2 394.184 9.72600   5
   2  -1  -2 390.647 8.73686   6
  -2  -1   2 380.947 9.34435   4
   2  -1  -2 401.300 9.53232   7
  -2  -1   2 387.339 9.34636   5
  -2  -1   2 386.226 8.86301   3
  -2  -1   2 384.952 8.75818   3
  -2   1   2 390.906 8.73579   6
   2   1  -2 386.986 9.35682   4
  -2   1   2 388.991 9.58689   7
   2   1  -2 390.583 9.31652   5
   2   1  -2 387.800 8.90026   3
  -1  -1   2 1463.14 30.3357   7
   0  -1  -2 0.10674 0.10410   4
   0  -1   2 -0.0621 0.07150   4
  -1  -1  -2 2958.01 91.3444   2
   1  -1   2 2729.82 90.5357   2
  -1  -1  -2 2960.06 91.0715   1
   1  -1   2 2734.99 90.3077   1
  -1   1  -2 3133.78 95.2442   2
   1   1   2 2636.68 87.9453   2
   1   1   2 2641.64 87.7250   1
  -1   1  -2 3142.22 95.0149   1
  -2  -1  -2 376.263 9.19657   6
  -2  -1  -2 375.800 9.17953   4
   2  -1   2 379.961 9.13180   6
   2  -1   2 370.495 8.85668   3
  -2  -1  -2 384.705 8.96182   5
   2  -1   2 376.840 9.08699   7
  -2  -1  -2 370.824 8.95208   3
  -2   1  -2 376.355 8.95652   3
   2   1   2 364.328 9.09123   6
   2   1   2 396.797 9.23681   4
   2   1   2 370.040 9.02334   3
  -2   1  -2 391.188 9.29111   7
  -2   1  -2 367.227 9.00736   6
   3  -1   2 1251.08 26.5307   5
   3  -1   2 1191.46 26.1495   7
  -3  -1  -2 1224.07 25.9611   3
  -3  -1  -2 1094.21 26.0209   5
  -3  -1  -2 1215.07 26.2388   4
  -3  -1  -2 1208.80 26.3781   6
   3  -1   2 1178.80 25.7758   3
  -3   1  -2 1209.62 26.1401   6
   3   1   2 1112.51 25.9700   5
   3   1   2 1183.67 26.1229   4
  -3   1  -2 1199.02 25.8924   3
   3   1   2 1192.88 26.2721   6
   3   1   2 1176.28 26.0283   3
  -4  -1  -2 54.8545 2.59825   4
  -4  -1  -2 50.0648 2.60236   5
   4  -1   2 50.9801 2.30619   3
   4  -1   2 56.6582 2.83707   5
  -4  -1  -2 56.4658 2.48123   3
   4  -1   2 52.6521 2.59954   6
  -4  -1  -2 56.4222 2.54280   7
   4   1   2 50.7328 2.53879   5
  -4   1  -2 53.3080 2.05165   4
  -4   1  -2 48.7464 2.49644   6
  -4   1  -2 53.1102 2.88158   5
   4   1   2 50.5311 2.61423   6
   4   1   2 54.5009 2.54188   3
  -4   1  -2 52.0311 2.37243   3
   4   1   2 54.6866 2.54184   4
   5  -1   2 462.436 11.9208   7
  -5  -1  -2 448.993 11.8930   4
   5  -1   2 459.650 12.0734   6
  -5  -1  -2 462.657 12.3591   5
   5  -1   2 461.584 12.4317   5
   5  -1   2 489.304 11.6188   3
  -5  -1  -2 469.687 11.6268   3
  -5  -1  -2 455.129 11.8076   7
  -5  -1  -2 450.171 12.2706   6
   5   1   2 459.998 11.8027   4
   5   1   2 461.266 11.8740   3
  -5   1  -2 448.362 10.8810   4
  -5   1  -2 456.322 12.0320   6
  -5   1  -2 499.377 12.9996   5
  -5   1  -2 469.574 11.6014   3
  -5   1  -2 462.761 12.4316   7
   5   1   2 466.154 12.1114   5
   5   1   2 450.329 12.1062   6
   6  -1   2 190.093 6.56886   6
   6  -1   2 191.060 6.32258   3
  -6  -1  -2 189.385 6.35201   7
  -6  -1  -2 196.444 6.14832   3
  -6  -1  -2 187.390 6.73417   6
   6  -1   2 214.397 7.22296   5
  -6  -1  -2 189.474 6.34536   4
   6  -1   2 183.216 6.28137   7
  -6   1  -2 191.914 6.57623   6
  -6   1  -2 191.769 5.48369   4
  -6   1  -2 191.210 6.89114   7
  -6   1  -2 188.157 6.04127   3
   6   1   2 189.263 6.31122   3
   6   1   2 185.986 6.60770   6
  -6   1  -2 186.813 7.17043   5
   6   1   2 180.758 6.14832   4
   7  -1   2 342.461 10.5188   5
   7  -1   2 338.094 9.46789   3
   7  -1   2 330.384 10.1098   6
  -7  -1  -2 336.084 9.81144   4
  -7  -1  -2 330.399 10.6573   5
  -7  -1  -2 327.847 9.36590   3
  -7  -1  -2 313.445 10.2564   6
   7  -1   2 348.693 9.97287   7
  -7  -1  -2 327.171 9.89487   7
  -7   1  -2 340.806 8.79740   4
   7   1   2 323.705 9.72069   3
   7   1   2 327.025 10.1335   6
   7   1   2 329.062 9.56678   4
  -7   1  -2 321.473 10.4489   7
  -7   1  -2 334.122 9.44940   3
   7   1   2 322.185 10.0652   5
  -7   1  -2 339.511 11.1096   5
  -7   1  -2 345.455 10.2528   6
  -8  -1  -2 67.2874 4.10784   6
  -8  -1  -2 68.4558 3.48634   3
  -8  -1  -2 64.1747 3.78891   7
  -8  -1  -2 60.9734 3.54392   4
   8  -1   2 65.8181 3.66381   7
   8  -1   2 63.6472 3.97889   5
   8  -1   2 61.4416 3.35600   3
   8  -1   2 60.3862 3.78622   6
  -8  -1  -2 67.4501 4.34184   5
  -8   1  -2 59.5423 4.10275   7
  -8   1  -2 65.9595 3.89189   6
   8   1   2 67.9457 3.94676   5
  -8   1  -2 62.1920 3.40750   3
   8   1   2 52.9863 3.73078   6
  -8   1  -2 62.9799 2.94133   4
  -8   1  -2 62.4289 4.38262   5
   8   1   2 62.6824 3.56175   3
   8   1   2 60.0817 3.42449   4
   9  -1   2 111.900 5.57928   6
  -9  -1  -2 121.846 6.38897   5
  -9  -1  -2 113.268 5.85331   6
  -9  -1  -2 122.442 5.38619   4
   9  -1   2 107.285 5.65611   5
  -9  -1  -2 113.819 4.90335   3
   9  -1   2 116.085 5.07201   3
   9  -1   2 122.038 5.46534   7
   9   1   2 109.259 5.50079   5
  -9   1  -2 119.890 5.75933   6
  -9   1  -2 118.619 4.50207   4
  -9   1  -2 114.434 6.07984   7
   9   1   2 118.383 5.76208   6
  -9   1  -2 117.311 5.00755   3
  -9   1  -2 109.899 6.31409   5
   9   1   2 114.349 5.10867   4
   9   1   2 121.091 5.48417   3
  10  -1   2 9.96970 1.88470   5
 -10  -1  -2 10.5131 2.02692   7
  10  -1   2 9.71921 2.30405   6
 -10  -1  -2 11.7795 2.29413   5
  10  -1   2 10.2558 1.87781   7
 -10  -1  -2 7.57145 2.01971   6
  10  -1   2 11.7098 1.86439   3
 -10  -1  -2 13.4414 2.01536   3
 -10  -1  -2 15.6923 2.33023   4
 -10   1  -2 15.0748 3.20949   5
 -10   1  -2 12.7113 1.99084   3
 -10   1  -2 14.3610 2.53383   7
  10   1   2 15.4467 2.34740   5
 -10   1  -2 11.5072 1.60593   4
  10   1   2 11.9239 2.10878   6
 -10   1  -2 13.5169 2.40789   6
  10   1   2 8.35247 1.69623   4
  10   1   2 11.3669 1.96945   3
 -11  -1  -2 239.432 10.4710   5
  11  -1   2 233.911 9.50187   5
 -11  -1  -2 237.097 8.21769   3
 -11  -1  -2 225.746 9.35494   7
  11  -1   2 232.950 8.89570   7
 -11  -1  -2 224.636 9.75313   6
  11  -1   2 238.604 8.64726   3
 -11  -1  -2 239.588 8.79243   4
  11  -1   2 241.824 9.47428   6
 -11   1  -2 233.487 7.58111   4
 -11   1  -2 235.157 10.1340   7
  11   1   2 243.031 8.70207   4
 -11   1  -2 223.435 9.38151   6
  11   1   2 243.879 9.47947   5
 -11   1  -2 229.273 10.5721   5
  11   1   2 226.933 8.83461   3
 -11   1  -2 236.720 8.27826   3
  11   1   2 223.909 9.28688   6
 -12  -1  -2 0.47806 0.94159   4
 -12  -1  -2 2.07460 1.18919   3
 -12  -1  -2 -0.8025 0.95617   5
 -12  -1  -2 0.82337 1.26719   7
  12  -1   2 1.30003 1.41114   6
 -12   1  -2 -1.0042 1.17068   7
  12   1   2 -0.5520 1.13638   6
 -12   1  -2 -0.5852 1.25703   5
 -12   1  -2 0.48478 0.94666   3
 -13  -1  -2 39.2078 3.53481   4
 -13  -1  -2 30.1435 4.42128   5
  13  -1   2 42.3102 4.08822   6
 -13  -1  -2 34.2684 3.87326   7
 -13  -1  -2 41.0872 3.24260   3
 -13   1  -2 36.9970 2.75890   4
  13   1   2 44.9290 4.30928   6
 -13   1  -2 39.7025 5.74047   5
 -13   1  -2 42.4499 4.58429   7
 -13   1  -2 46.6992 3.50789   3
 -14  -1  -2 64.9954 5.42605   7
 -14  -1  -2 54.2044 3.96610   3
 -14  -1  -2 54.9942 4.38937   4
  14  -1   2 60.7735 5.10649   6
 -14  -1  -2 66.2624 6.08724   5
  14   1   2 58.8184 5.11263   6
 -14   1  -2 54.3059 3.48169   4
 -14   1  -2 63.4684 6.09776   5
 -14   1  -2 63.2836 5.84928   7
 -14   1  -2 56.0954 3.95279   3
 -15  -1  -2 108.026 6.30454   4
 -15  -1  -2 113.487 8.31324   5
  15  -1   2 108.158 7.04308   6
 -15  -1  -2 110.805 7.53448   7
 -15  -1  -2 111.807 5.53351   3
  15   1   2 113.590 7.31643   6
 -15   1  -2 105.511 4.92601   4
 -15   1  -2 112.773 5.58202   3
 -15   1  -2 102.669 11.7733   7
 -16  -1  -2 46.3348 3.68766   3
 -16  -1  -2 60.2547 5.73264   7
 -16  -1  -2 48.7295 4.69910   4
 -16  -1  -2 43.4458 6.50715   5
  16  -1   2 52.8338 5.14407   6
  16   1   2 47.0805 5.09547   6
 -16   1  -2 49.8450 3.72968   3
 -16   1  -2 48.1834 3.44019   4
 -16   1  -2 48.6783 5.49500   7
 -17  -1  -2 4.57913 2.87291   5
 -17  -1  -2 2.12102 1.46802   3
  17  -1   2 1.96474 1.83629   6
 -17  -1  -2 4.44672 2.40796   7
 -17   1  -2 5.60469 3.02387   7
 -17   1  -2 6.57927 1.67240   3
  17   1   2 6.36237 2.40541   6
 -18  -1  -2 32.5979 3.14744   3
 -18  -1  -2 38.3960 5.56298   7
 -18  -1  -2 35.0634 5.65774   5
  18  -1   2 27.4788 4.62291   6
 -18   1  -2 42.9859 6.42567   7
  18   1   2 31.6821 4.82043   6
 -19  -1  -2 194.363 12.0154   7
 -19  -1  -2 191.145 12.4669   5
  19  -1   2 202.921 11.2728   6
  19   1   2 211.348 11.4100   6
  19  -2  -2 11.5875 3.31057   6
 -19  -2   2 20.5276 4.94541   5
 -19  -2   2 17.5533 3.95838   7
 -19   2   2 14.1101 4.53513   7
  19   2  -2 12.1893 3.28330   6
 -18  -2   2 22.0692 5.50674   5
  18  -2  -2 22.1694 3.86204   6
 -18  -2   2 27.6583 4.58052   7
 -18   2   2 32.1115 6.53869   7
  18   2  -2 23.9626 4.05435   6
 -17  -2   2 3.31429 2.12151   5
 -17  -2   2 0.47536 1.82930   7
  17  -2  -2 -0.1287 1.82722   6
  17   2  -2 1.24896 1.53015   6
 -17   2   2 1.42585 2.23261   7
 -16  -2   2 4.12210 2.51259   5
  16  -2  -2 1.72126 1.47359   6
 -16  -2   2 1.32100 1.61566   7
 -16   2   2 3.27710 2.30838   7
  16   2  -2 2.62101 2.04095   6
 -15  -2   2 5.34062 2.03828   7
 -15  -2   2 3.82954 1.13617   3
 -15  -2   2 5.25088 1.90767   4
  15  -2  -2 5.75594 1.98774   6
 -15  -2   2 4.82888 2.68559   5
 -15   2   2 3.92766 2.34405   7
  15   2  -2 8.89647 2.22256   4
  15   2  -2 7.43104 2.67166   6
 -14  -2   2 8.33211 1.53485   3
 -14  -2   2 9.34431 2.47003   7
  14  -2  -2 9.78696 2.47024   6
 -14  -2   2 9.80102 2.32849   4
 -14  -2   2 10.4015 3.27133   5
  14   2  -2 9.54666 2.55068   6
 -14   2   2 6.58238 2.20647   7
  14   2  -2 8.23140 2.02466   4
  13  -2  -2 1.71655 1.43156   6
 -13  -2   2 1.33799 1.09922   4
 -13  -2   2 3.11851 1.12954   3
 -13  -2   2 0.32613 1.25447   5
 -13  -2   2 0.60963 1.14358   7
 -13   2   2 0.49087 1.30783   7
 -13   2   2 3.30125 0.97549   3
  13   2  -2 4.61118 1.65146   6
  13   2  -2 1.30734 1.19994   4
 -12  -2   2 26.7854 2.36160   3
 -12  -2   2 24.7349 2.82086   4
 -12  -2   2 29.3498 4.52384   5
 -12  -2   2 33.0055 3.31431   7
  12  -2  -2 29.0282 2.66158   3
  12  -2  -2 26.4803 3.12019   6
  12   2  -2 22.1189 3.11055   3
 -12   2   2 26.4896 2.15796   3
  12   2  -2 31.9765 3.50677   6
  12   2  -2 25.0983 2.81633   4
 -12   2   2 29.4949 4.49381   7
 -12   2   2 24.0270 2.89101   6
  11  -2  -2 566.804 18.2664   5
 -11  -2   2 612.814 19.2849   5
  11  -2  -2 590.757 16.8999   7
 -11  -2   2 587.208 15.0523   3
 -11  -2   2 584.885 17.0449   4
  11  -2  -2 546.697 16.3698   3
  11  -2  -2 606.686 17.1759   6
 -11  -2   2 603.820 16.9587   7
 -11   2   2 620.427 19.0695   7
 -11   2   2 598.478 14.8502   3
  11   2  -2 578.955 16.8204   3
  11   2  -2 564.759 17.7793   5
  11   2  -2 597.169 17.5434   6
  11   2  -2 604.723 16.6213   4
 -11   2   2 615.377 17.4387   6
 -10  -2   2 632.665 19.1825   5
  10  -2  -2 618.607 17.2250   6
 -10  -2   2 621.099 17.3956   4
  10  -2  -2 614.516 18.8136   5
  10  -2  -2 617.024 17.1479   7
 -10  -2   2 626.220 15.5454   3
  10  -2  -2 594.236 16.0848   3
 -10  -2   2 619.780 16.9509   7
 -10   2   2 618.110 18.8955   7
  10   2  -2 612.862 17.0477   3
  10   2  -2 614.026 18.5132   4
 -10   2   2 632.943 15.4359   3
  10   2  -2 644.828 17.8595   6
 -10   2   2 620.218 17.3115   6
  10   2  -2 628.555 18.1059   5
   9  -2  -2 200.813 8.55083   5
  -9  -2   2 202.916 6.53157   3
  -9  -2   2 193.510 7.16146   7
   9  -2  -2 203.581 7.64331   7
  -9  -2   2 200.668 7.70033   4
   9  -2  -2 212.903 7.69061   6
   9  -2  -2 206.964 6.87439   3
   9   2  -2 212.969 8.08771   6
  -9   2   2 200.971 8.68410   7
   9   2  -2 204.949 7.49199   3
  -9   2   2 193.323 7.44660   6
   9   2  -2 199.688 7.45664   4
  -9   2   2 199.935 6.34577   3
   9   2  -2 204.378 8.16163   5
   8  -2  -2 501.621 13.8546   6
  -8  -2   2 496.193 14.2014   4
   8  -2  -2 525.065 15.5016   5
   8  -2  -2 482.521 14.0002   7
  -8  -2   2 519.234 13.5120   7
  -8  -2   2 511.612 12.8884   3
   8  -2  -2 504.686 13.0675   3
  -8   2   2 499.999 16.9457   7
  -8   2   2 506.121 13.8838   6
   8   2  -2 491.061 13.7138   3
   8   2  -2 525.120 14.8240   5
   8   2  -2 480.357 15.7226   6
   8   2  -2 523.563 14.0415   4
  -8   2   2 526.382 12.7793   3
   7  -2  -2 86.3664 4.84712   5
  -7  -2   2 90.6836 3.79932   7
  -7  -2   2 88.2308 3.57603   3
   7  -2  -2 87.6249 4.06714   6
  -7  -2   2 79.5335 4.61128   5
   7  -2  -2 93.6670 4.38286   7
  -7  -2   2 85.8845 4.32116   4
   7  -2  -2 85.4858 3.60012   3
  -7   2   2 90.7849 4.88684   7
   7   2  -2 88.2927 4.45211   6
  -7   2   2 91.3754 3.53981   3
   7   2  -2 89.0979 4.25389   4
   7   2  -2 80.7373 4.36821   5
   7   2  -2 88.6752 4.03826   3
  -7   2   2 89.6773 4.07890   6
   6  -2  -2 169.013 5.35461   3
  -6  -2   2 174.584 5.37962   7
  -6  -2   2 168.865 6.55213   5
   6  -2  -2 172.022 6.87277   5
   6  -2  -2 174.377 6.24710   7
  -6  -2   2 171.899 5.29339   3
   6  -2  -2 169.073 5.74211   6
  -6  -2   2 174.292 6.29504   4
  -6   2   2 152.292 6.48579   7
  -6   2   2 174.426 5.76453   6
   6   2  -2 154.639 6.71200   3
  -6   2   2 169.020 5.18845   3
   6   2  -2 169.864 6.34682   5
   6   2  -2 164.381 6.06552   4
   5  -2  -2 1397.45 30.8786   3
   5  -2  -2 1423.97 32.1325   7
   5  -2  -2 1423.70 31.2599   6
  -5  -2   2 1353.75 31.9827   4
  -5  -2   2 1395.31 32.2620   5
  -5  -2   2 1423.76 30.8340   3
  -5  -2   2 1380.68 30.6300   7
   5  -2  -2 1441.54 33.1903   5
  -5   2   2 1415.15 30.7405   3
  -5   2   2 1399.54 32.7086   7
   5   2  -2 1453.41 32.2325   6
   5   2  -2 1403.11 31.3675   3
   5   2  -2 1431.19 32.0051   4
  -5   2   2 1409.25 31.1762   6
   4  -2  -2 484.907 11.7658   6
  -4  -2   2 484.476 12.5986   4
   4  -2  -2 481.707 13.1165   5
   4  -2  -2 484.390 12.6753   7
   4  -2  -2 477.617 11.6310   3
  -4  -2   2 486.836 12.5610   5
  -4  -2   2 474.137 11.5762   3
  -4   2   2 468.943 11.6589   6
  -4   2   2 505.841 13.1538   7
  -4   2   2 493.872 11.5438   3
   4   2  -2 478.585 11.9989   3
   4   2  -2 489.717 12.5673   4
   4   2  -2 492.566 12.5557   5
   3  -2  -2 1257.59 26.1206   6
  -3  -2   2 1191.60 26.9590   4
   3  -2  -2 1187.10 26.0583   3
  -3  -2   2 1219.52 26.1628   3
   3  -2  -2 1163.19 27.0449   7
  -3  -2   2 1159.04 26.6935   5
   3   2  -2 1232.83 26.5047   3
  -3   2   2 1213.48 25.9785   3
  -3   2   2 1185.64 25.8771   6
   3   2  -2 1170.16 26.8772   4
  -3   2   2 1152.66 27.2784   7
  -2  -2   2 292.950 7.57715   3
   2  -2  -2 290.146 7.42132   3
  -2  -2   2 279.993 7.91939   4
   2  -2  -2 306.615 6.85373   4
  -2  -2   2 301.573 7.61110   3
   2  -2  -2 286.002 8.11559   7
   2   2  -2 292.293 7.70688   3
  -2   2   2 299.667 6.81830   4
  -2   2   2 290.770 7.19529   6
  -2   2   2 293.972 8.28339   7
   2   2  -2 295.010 8.03644   4
   1  -2  -2 582.232 12.8837   4
  -1  -2   2 577.756 12.9086   7
  -1  -2   2 572.132 13.5557   4
  -1  -2   2 559.639 13.2244   3
   1  -2  -2 570.238 13.8074   7
  -1  -2   2 571.915 13.3673   3
   1   2  -2 571.247 13.4316   3
  -1   2   2 564.311 12.8204   4
   1   2  -2 585.872 12.9295   7
   1   2  -2 576.694 13.6173   4
  -1   2   2 570.319 13.8347   7
   1   2  -2 558.696 13.3279   3
   0  -2   2 86.9581 2.96192   7
   0  -2  -2 85.6868 3.00007   4
   0  -2  -2 91.1607 3.39210   7
   0  -2   2 92.2446 3.15033   4
   0  -2  -2 91.6059 3.21342   3
   0   2   2 87.4074 3.10921   3
   0   2  -2 87.7116 3.14702   4
   0   2  -2 93.9034 3.10177   7
   0   2   2 86.9723 3.00152   4
   1  -2   2 197.104 5.31027   4
   1  -2   2 200.549 5.63280   7
  -1  -2  -2 191.372 5.63488   3
  -1  -2  -2 206.583 5.74984   4
   1   2   2 194.025 5.62297   4
  -1   2  -2 197.699 5.73635   7
  -1   2  -2 197.204 5.37313   4
  -1   2  -2 203.758 5.65528   3
   2  -2   2 357.211 9.27049   7
  -2  -2  -2 358.046 9.37541   4
  -2  -2  -2 363.694 9.19287   3
   2  -2   2 345.280 8.93610   3
   2   2   2 358.707 9.26944   3
  -2   2  -2 358.643 9.11891   3
  -2   2  -2 350.889 9.01600   6
   2   2   2 365.419 9.38543   4
  -2   2  -2 369.576 8.59429   4
   3  -2   2 2212.23 46.3679   7
   3  -2   2 2178.61 46.1963   6
   3  -2   2 2130.44 45.8103   3
  -3  -2  -2 2104.82 46.0041   5
  -3  -2  -2 2112.55 45.9316   3
  -3  -2  -2 2126.25 46.4094   4
  -3   2  -2 2122.12 45.9106   6
  -3   2  -2 2153.63 44.9942   4
   3   2   2 2155.22 46.3657   6
   3   2   2 2080.70 46.2968   4
  -3   2  -2 2165.90 46.0018   3
  -3   2  -2 2179.54 46.7607   7
   3   2   2 2125.49 46.1775   3
   4  -2   2 1173.83 26.8886   5
   4  -2   2 1166.83 25.8295   3
   4  -2   2 1196.13 26.4708   7
   4  -2   2 1152.87 26.2753   6
  -4  -2  -2 1167.31 25.9912   3
  -4  -2  -2 1167.72 26.2940   5
  -4  -2  -2 1176.15 26.6226   4
   4   2   2 1165.27 26.3126   3
  -4   2  -2 1158.46 26.0219   3
  -4   2  -2 1121.01 26.8602   7
   4   2   2 1128.59 26.4304   4
  -4   2  -2 1122.79 26.0020   6
   4   2   2 1131.00 26.4696   6
  -5  -2  -2 3342.13 72.9888   6
   5  -2   2 3369.75 71.6478   3
   5  -2   2 3469.36 73.1594   5
  -5  -2  -2 3206.36 72.3730   5
  -5  -2  -2 3443.67 71.8804   3
   5  -2   2 3421.95 72.5822   7
  -5  -2  -2 3405.26 72.6305   4
   5  -2   2 3440.14 72.4287   6
  -5   2  -2 3317.64 73.1284   7
   5   2   2 3379.09 72.4440   4
  -5   2  -2 3381.92 71.9308   3
   5   2   2 3382.29 72.6370   6
  -5   2  -2 3356.62 72.1633   6
   5   2   2 3433.18 72.5189   5
   6  -2   2 3059.78 65.0647   7
   6  -2   2 3007.45 64.2270   3
   6  -2   2 2991.48 65.0225   6
  -6  -2  -2 2914.53 65.6182   6
  -6  -2  -2 3116.64 64.5442   7
  -6  -2  -2 3114.84 65.4087   5
  -6  -2  -2 3102.34 64.3810   3
  -6  -2  -2 3036.48 65.2884   4
   6  -2   2 3061.80 65.8931   5
   6   2   2 2983.96 65.2742   6
  -6   2  -2 2971.55 64.8075   6
  -6   2  -2 3012.03 64.4743   3
   6   2   2 2828.11 64.8193   4
   6   2   2 3023.17 64.9429   3
   6   2   2 3045.20 65.2154   5
  -6   2  -2 2985.52 62.8419   4
  -6   2  -2 2772.13 65.6957   7
   7  -2   2 97.7887 4.73876   6
  -7  -2  -2 102.712 4.44696   7
  -7  -2  -2 96.4634 4.92146   5
   7  -2   2 98.3107 4.20926   3
  -7  -2  -2 97.5489 4.24615   3
   7  -2   2 103.771 5.15819   5
  -7  -2  -2 104.840 4.86704   4
   7  -2   2 99.9716 4.64493   7
  -7  -2  -2 89.9218 4.84663   6
   7   2   2 95.8631 4.79309   6
  -7   2  -2 102.955 3.36544   4
  -7   2  -2 99.8926 4.62046   6
   7   2   2 94.6938 4.55762   3
  -7   2  -2 96.1168 5.19417   7
   7   2   2 100.903 4.81422   5
  -7   2  -2 120.002 4.68679   3
   7   2   2 103.097 4.66517   4
  -8  -2  -2 189.816 6.96313   7
   8  -2   2 195.733 7.21991   7
  -8  -2  -2 195.670 6.70829   3
  -8  -2  -2 192.379 7.85634   6
   8  -2   2 186.106 6.65231   3
   8  -2   2 187.891 8.30505   6
  -8  -2  -2 180.753 8.90495   5
   8  -2   2 195.090 7.86106   5
  -8  -2  -2 185.645 7.31422   4
  -8   2  -2 188.159 5.49299   4
  -8   2  -2 191.067 6.79520   3
  -8   2  -2 198.152 8.19871   7
   8   2   2 198.221 7.25126   4
  -8   2  -2 193.518 7.29037   6
   8   2   2 195.530 7.30294   3
   8   2   2 203.012 7.67214   6
   8   2   2 196.926 7.51070   5
  -9  -2  -2 705.895 19.9386   5
   9  -2   2 699.358 19.0239   6
  -9  -2  -2 696.917 19.8739   6
   9  -2   2 717.624 19.8047   5
   9  -2   2 686.202 18.0143   3
  -9  -2  -2 675.565 19.7078   7
  -9  -2  -2 703.124 19.0121   4
   9  -2   2 691.140 18.6575   7
  -9   2  -2 712.355 18.1698   3
   9   2   2 722.833 18.7447   4
  -9   2  -2 720.717 19.0841   6
   9   2   2 678.655 18.7905   3
   9   2   2 688.363 19.0765   5
   9   2   2 700.207 19.2916   6
  -9   2  -2 741.588 20.5837   7
  -9   2  -2 703.883 16.3398   4
  10  -2   2 1439.37 35.1734   3
  10  -2   2 1481.69 35.0000   6
 -10  -2  -2 1406.53 35.9638   5
  10  -2   2 1419.48 34.4493   7
 -10  -2  -2 1463.21 34.5508   7
 -10  -2  -2 1389.12 35.8609   6
  10  -2   2 1458.81 35.6963   5
 -10  -2  -2 1451.29 33.3535   3
 -10  -2  -2 1434.01 34.7703   4
  10   2   2 1446.13 35.1401   6
  10   2   2 1416.49 34.1462   4
 -10   2  -2 1444.12 34.9382   6
 -10   2  -2 1436.36 31.5600   4
 -10   2  -2 1404.96 36.3686   7
  10   2   2 1413.44 34.9527   3
  11  -2   2 1778.98 42.7444   5
  11  -2   2 1695.91 40.5497   3
 -11  -2  -2 1767.59 40.1352   3
 -11  -2  -2 1762.29 41.8291   4
  11  -2   2 1763.69 41.9721   6
 -11  -2  -2 1768.88 43.5548   5
  11  -2   2 1705.80 41.3369   7
 -11  -2  -2 1852.16 41.8859   7
 -11   2  -2 1763.03 38.2405   4
  11   2   2 1803.94 41.2948   4
  11   2   2 1724.25 42.1288   6
 -11   2  -2 1699.50 43.6960   7
  11   2   2 1680.82 41.5508   3
  11   2   2 1773.42 42.1551   5
 -11   2  -2 1737.70 40.2866   3
 -11   2  -2 1723.67 41.9633   6
 -12  -2  -2 118.658 6.48529   4
  12  -2   2 120.221 6.68590   6
 -12  -2  -2 120.101 7.48947   5
 -12  -2  -2 122.178 5.61950   3
 -12  -2  -2 114.884 6.43327   7
 -12   2  -2 123.197 5.81736   3
  12   2   2 124.927 6.25553   4
 -12   2  -2 111.097 4.26095   4
 -12   2  -2 125.221 7.77495   7
  12   2   2 117.671 6.71532   6
 -13  -2  -2 89.5610 6.72945   5
 -13  -2  -2 78.0589 5.48598   7
  13  -2   2 80.7047 5.69593   6
 -13  -2  -2 69.8960 4.38876   3
 -13  -2  -2 71.4976 5.11508   4
  13   2   2 71.4494 4.85412   4
 -13   2  -2 74.4282 4.54560   3
  13   2   2 73.3810 5.48009   6
 -13   2  -2 71.7633 3.19493   4
 -13   2  -2 74.8215 6.29488   7
 -14  -2  -2 37.7814 4.27167   7
  14  -2   2 33.5376 4.04692   6
 -14  -2  -2 36.2573 5.36954   5
 -14  -2  -2 37.7069 4.02759   4
 -14  -2  -2 39.9586 3.40387   3
  14   2   2 40.8376 7.79687   6
 -14   2  -2 35.1569 3.24180   3
 -14   2  -2 34.8999 2.14502   4
 -14   2  -2 39.0809 5.26140   7
  15  -2   2 43.0301 4.63958   6
 -15  -2  -2 50.5385 4.95362   7
 -15  -2  -2 44.3805 5.36260   5
 -15  -2  -2 47.6895 3.70202   3
  15   2   2 43.1204 4.84514   6
 -15   2  -2 43.9713 3.59636   3
 -15   2  -2 51.7296 5.67693   7
 -16  -2  -2 22.4067 4.26737   5
 -16  -2  -2 23.4771 4.29968   7
  16  -2   2 24.7237 3.86352   6
 -16  -2  -2 23.3982 2.95522   3
 -16   2  -2 19.8294 2.61298   3
 -16   2  -2 21.9357 4.37595   7
  16   2   2 18.9135 3.91263   6
 -17  -2  -2 29.5026 4.87273   7
  17  -2   2 29.5917 4.71677   6
 -17  -2  -2 26.6437 2.94345   3
 -17  -2  -2 25.6462 5.30567   5
 -17   2  -2 28.8038 5.59592   7
 -17   2  -2 23.9332 2.82708   3
  17   2   2 27.8855 5.01829   6
 -18  -2  -2 15.4166 4.24166   5
  18  -2   2 11.5110 3.17443   6
 -18  -2  -2 23.0901 4.66503   7
 -18  -2  -2 17.6430 2.43505   3
 -18   2  -2 7.90499 3.37414   7
  18   2   2 19.7177 4.15513   6
 -18  -3   2 26.9626 4.43086   7
  18  -3  -2 18.1549 3.63891   6
 -18  -3   2 29.5627 8.53467   5
 -18   3   2 24.1051 5.08596   7
  18   3  -2 19.2999 3.73012   6
 -17  -3   2 38.5251 5.90150   7
  17  -3  -2 38.3835 5.42632   6
 -17  -3   2 38.9825 5.97000   5
  17   3  -2 32.4268 4.77488   6
 -17   3   2 33.9127 5.62258   7
 -16  -3   2 90.1334 8.01785   5
  16  -3  -2 81.3686 6.28440   6
 -16  -3   2 86.7973 3.90855   3
 -16  -3   2 89.4608 6.44453   7
  16   3  -2 81.6051 5.75313   4
 -16   3   2 93.4823 7.85910   7
  16   3  -2 91.3605 6.74327   6
  15  -3  -2 25.6870 3.82288   6
 -15  -3   2 28.1376 5.13658   5
 -15  -3   2 22.9148 2.34223   3
 -15  -3   2 29.1362 4.14964   7
  15   3  -2 22.2653 3.35917   4
  15   3  -2 28.4325 4.13469   6
 -15   3   2 27.9242 5.07910   7
 -14  -3   2 116.297 8.66615   5
 -14  -3   2 130.074 7.10048   7
  14  -3  -2 128.036 7.23303   6
 -14  -3   2 124.346 5.24549   3
  14   3  -2 126.575 6.88379   4
  14   3  -2 140.366 11.7320   6
 -14   3   2 119.314 8.43589   7
  13  -3  -2 85.0856 5.67337   6
 -13  -3   2 99.0402 7.13130   5
 -13  -3   2 89.2005 4.35327   3
 -13  -3   2 91.7939 5.54351   7
 -13  -3   2 77.0863 5.48766   4
 -13   3   2 87.4562 6.86333   7
  13   3  -2 91.8717 5.57515   4
  13   3  -2 89.1624 6.04888   6
 -13   3   2 86.9409 3.80594   3
 -12  -3   2 161.034 7.94865   4
 -12  -3   2 175.321 9.29984   5
 -12  -3   2 181.331 7.63470   7
  12  -3  -2 171.177 7.91176   6
 -12  -3   2 168.827 6.31823   3
  12   3  -2 173.098 7.72481   4
 -12   3   2 172.452 9.40539   7
 -12   3   2 163.132 7.66266   6
 -12   3   2 174.729 5.99718   3
  12   3  -2 167.936 8.22515   6
 -11  -3   2 13.7611 2.61011   4
  11  -3  -2 3.00591 1.08197   3
 -11  -3   2 3.08104 1.45521   5
  11  -3  -2 2.02948 1.43238   6
 -11  -3   2 5.69256 1.56987   7
  11  -3  -2 2.33798 1.68026   7
 -11   3   2 4.23628 1.93684   7
  11   3  -2 4.78369 1.54660   3
  11   3  -2 5.57688 1.68833   4
 -11   3   2 5.08782 1.21131   3
  11   3  -2 3.54635 1.44491   6
 -11   3   2 4.32700 1.53964   6
 -10  -3   2 61.6250 4.89038   5
  10  -3  -2 59.3283 4.07639   6
  10  -3  -2 63.0314 4.87130   5
 -10  -3   2 58.1784 3.31577   3
  10  -3  -2 58.1059 3.49567   3
  10  -3  -2 53.3663 3.90242   7
 -10  -3   2 54.6173 3.56575   7
 -10  -3   2 56.6477 4.21900   4
 -10   3   2 61.0991 5.03075   7
  10   3  -2 57.7115 4.14192   4
  10   3  -2 62.2592 4.48845   6
 -10   3   2 54.9165 3.82697   6
  10   3  -2 58.5677 4.36981   5
 -10   3   2 63.8359 3.31398   3
  -9  -3   2 38.0645 3.63479   5
   9  -3  -2 33.4614 2.97055   7
   9  -3  -2 36.5269 2.68410   3
   9  -3  -2 37.6123 3.60387   5
  -9  -3   2 40.1224 3.39786   4
  -9  -3   2 35.8780 2.65775   7
  -9  -3   2 39.2775 2.63655   3
  -9   3   2 34.3594 3.65992   7
   9   3  -2 30.9528 2.85529   3
   9   3  -2 36.1948 3.31353   6
  -9   3   2 30.4545 2.72602   6
   9   3  -2 38.0043 3.39511   5
  -9   3   2 35.4637 2.46858   3
   9   3  -2 36.4194 3.18346   4
   8  -3  -2 83.5671 5.16861   5
  -8  -3   2 77.1405 4.81324   5
   8  -3  -2 79.0776 4.45537   7
  -8  -3   2 74.1247 4.48890   4
  -8  -3   2 83.6155 3.77014   3
   8  -3  -2 80.9680 4.22325   6
  -8  -3   2 74.4732 3.60316   7
   8  -3  -2 73.3396 3.67953   3
   8   3  -2 80.4013 4.67488   6
   8   3  -2 73.0576 4.48124   5
  -8   3   2 75.7766 3.54899   3
  -8   3   2 80.9426 5.19262   7
  -8   3   2 75.1674 3.99832   6
   8   3  -2 73.6673 5.16077   4
   8   3  -2 72.5448 4.15375   3
   7  -3  -2 2.69746 1.09961   5
  -7  -3   2 2.66936 1.39499   5
  -7  -3   2 3.02806 0.91407   3
  -7  -3   2 2.03774 0.95518   4
   7  -3  -2 4.53180 1.01066   3
  -7  -3   2 4.07514 0.96662   7
   7  -3  -2 3.84421 1.23486   7
   7  -3  -2 3.10782 1.01356   6
   7   3  -2 3.30712 1.03784   3
   7   3  -2 3.44043 1.06152   4
  -7   3   2 4.04459 1.01264   6
  -7   3   2 3.27346 0.90584   3
   6  -3  -2 297.071 10.1316   5
   6  -3  -2 297.113 8.42530   3
  -6  -3   2 253.043 9.22530   5
   6  -3  -2 280.999 9.33560   7
  -6  -3   2 300.592 8.37028   3
   6  -3  -2 287.817 8.62278   6
  -6  -3   2 289.802 9.50600   4
   6   3  -2 293.592 9.42107   4
   6   3  -2 283.298 8.95999   3
  -6   3   2 300.642 8.58379   6
  -6   3   2 287.041 10.1285   7
  -6   3   2 298.357 8.29111   3
  -5  -3   2 1166.98 26.9262   4
   5  -3  -2 1135.11 27.3786   5
   5  -3  -2 1139.14 25.6981   6
  -5  -3   2 1113.89 25.4010   3
  -5  -3   2 1121.90 26.5640   5
   5  -3  -2 1098.10 26.6766   7
   5  -3  -2 1094.20 25.4246   3
  -5   3   2 1086.01 25.2972   6
  -5   3   2 1093.15 27.4237   7
   5   3  -2 1093.84 26.0680   3
   5   3  -2 1111.51 26.6537   4
  -5   3   2 1163.57 25.4125   3
  -4  -3   2 856.926 20.1091   3
  -4  -3   2 850.142 20.7673   5
   4  -3  -2 889.368 18.3712   4
  -4  -3   2 839.857 22.4514   4
   4  -3  -2 880.312 20.0992   3
  -4   3   2 859.717 18.3865   4
  -4   3   2 847.397 19.9215   3
  -4   3   2 862.674 19.7833   6
   4   3  -2 853.091 21.0645   4
   4   3  -2 862.313 20.6267   3
  -4   3   2 886.127 21.8367   7
   3  -3  -2 7.33296 1.14538   3
  -3  -3   2 6.67461 1.12237   3
  -3  -3   2 6.13381 1.06700   4
  -3  -3   2 6.74804 1.11363   5
  -3  -3   2 6.54681 1.13251   3
   3  -3  -2 7.39663 0.76256   4
   3  -3  -2 5.40958 1.05688   7
  -3   3   2 3.64033 1.02787   7
  -3   3   2 7.95472 1.13133   6
   3   3  -2 8.25101 1.49253   4
   3   3  -2 8.50344 1.33789   3
  -3   3   2 7.40961 0.73816   4
   2  -3  -2 1413.14 31.6076   7
  -2  -3   2 1414.23 30.9916   3
  -2  -3   2 1414.86 30.3391   7
  -2  -3   2 1357.20 30.7762   3
  -2  -3   2 1349.61 31.2462   4
   2  -3  -2 1385.12 30.6812   3
   2  -3  -2 1446.55 30.0011   4
  -2   3   2 1343.23 29.8722   4
   2   3  -2 1359.80 31.3224   4
  -2   3   2 1367.02 31.7545   7
   2   3  -2 1398.44 31.0946   3
   1  -3  -2 779.080 17.7283   4
  -1  -3   2 789.063 18.4693   4
  -1  -3   2 764.864 18.3249   3
   1  -3  -2 756.599 18.6712   7
   1  -3  -2 779.399 18.0954   3
  -1  -3   2 783.865 17.8721   7
  -1  -3   2 754.962 18.0846   3
   1  -3  -2 774.526 18.2941   3
   1   3  -2 778.946 17.8768   7
   1   3  -2 789.825 18.5075   4
  -1   3   2 801.204 17.7420   4
  -1   3   2 760.882 18.7821   7
   1   3  -2 745.286 18.2853   3
   0  -3  -2 2810.41 61.4598   3
   0  -3   2 2922.34 61.1724   7
   0  -3  -2 2858.11 61.7562   7
   0  -3  -2 2960.54 61.2087   4
   0  -3   2 2776.69 61.1710   3
   0  -3   2 2831.65 61.2378   4
   0   3  -2 2868.28 61.3352   4
   0   3  -2 2976.75 61.5123   3
   0   3   2 2778.66 61.2863   3
   0   3   2 2926.89 61.1393   4
   0   3  -2 2929.99 61.3336   7
  -1  -3  -2 1612.80 35.5880   4
   1  -3   2 1628.80 35.5055   7
   1  -3   2 1633.94 35.0941   4
  -1  -3  -2 1656.02 35.8061   7
   1  -3   2 1615.70 35.3509   3
  -1   3  -2 1586.19 35.1250   4
  -1   3  -2 1590.19 35.5092   3
  -1   3  -2 1586.33 35.7158   7
   1   3   2 1576.59 35.6074   3
   1   3   2 1623.68 35.5557   4
   2  -3   2 2.84376 0.75838   3
   2  -3   2 2.49695 0.64210   4
  -2  -3  -2 2.92553 0.83389   3
  -2  -3  -2 4.84293 1.11448   4
   2  -3   2 2.39824 0.69938   7
  -2   3  -2 2.24413 0.73145   3
  -2   3  -2 1.92356 0.79761   7
   2   3   2 1.88828 0.70567   4
   2   3   2 3.09929 0.84280   3
  -2   3  -2 2.68036 0.66168   4
  -2   3  -2 2.99379 0.78844   6
  -3  -3  -2 60.2978 3.08282   3
   3  -3   2 59.2682 3.13717   7
   3  -3   2 60.7298 2.92012   3
  -3  -3  -2 58.3412 3.21544   4
  -3   3  -2 58.4812 2.46628   4
  -3   3  -2 59.6625 3.03985   3
   3   3   2 59.4157 3.19078   4
  -3   3  -2 61.7949 3.45466   7
  -3   3  -2 59.6498 2.92061   6
  -4  -3  -2 187.055 6.37925   5
  -4  -3  -2 200.464 6.98189   4
  -4  -3  -2 190.995 6.28216   3
   4  -3   2 188.996 6.48270   6
   4   3   2 191.357 6.59409   3
   4   3   2 190.180 6.71435   4
  -4   3  -2 199.515 7.19402   7
   4   3   2 190.045 6.66006   6
  -4   3  -2 184.077 6.11266   6
  -4   3  -2 185.376 5.25604   4
  -4   3  -2 184.285 6.28464   3
   5  -3   2 732.061 19.0024   5
   5  -3   2 707.553 17.6566   3
  -5  -3  -2 728.328 17.9211   3
  -5  -3  -2 741.550 18.8807   4
   5  -3   2 731.012 18.5200   7
   5  -3   2 753.277 18.4407   6
  -5  -3  -2 746.378 18.4533   5
   5   3   2 738.360 18.6796   6
   5   3   2 742.030 18.5153   3
  -5   3  -2 743.153 18.1227   3
  -5   3  -2 729.714 17.9434   6
   5   3   2 707.714 18.5260   4
  -5   3  -2 713.632 19.2536   7
  -5   3  -2 734.908 16.3794   4
   6  -3   2 0.66585 0.77069   5
   6  -3   2 0.67729 0.62147   3
  -6  -3  -2 0.59851 0.71864   4
   6  -3   2 1.15909 0.79202   6
  -6  -3  -2 0.54881 0.79840   5
   6  -3   2 0.95319 0.66992   7
  -6  -3  -2 0.45303 0.70345   3
   6   3   2 1.03134 0.78888   4
  -6   3  -2 -0.0195 0.84377   7
   6   3   2 0.76023 0.73222   3
  -6   3  -2 1.98047 0.52797   4
  -6   3  -2 1.03900 0.79410   6
  -6   3  -2 1.29290 0.77938   3
   6   3   2 0.62546 0.88209   6
   7  -3   2 118.003 5.86946   5
  -7  -3  -2 116.460 5.67373   5
   7  -3   2 116.988 5.34236   7
   7  -3   2 118.209 5.40421   6
  -7  -3  -2 115.514 4.89773   3
  -7  -3  -2 116.584 5.58610   4
   7  -3   2 116.825 4.82396   3
  -7   3  -2 110.093 5.00027   6
   7   3   2 112.319 5.50165   6
  -7   3  -2 107.397 5.87810   7
   7   3   2 117.948 5.43350   3
  -7   3  -2 114.179 3.42075   4
  -7   3  -2 113.822 3.41815   4
  -7   3  -2 114.635 5.01716   3
   7   3   2 111.407 5.37084   4
   8  -3   2 0.94669 0.82421   5
  -8  -3  -2 0.15386 0.83615   5
  -8  -3  -2 1.02417 1.04088   3
   8  -3   2 -0.5968 0.51295   3
  -8  -3  -2 0.15652 0.70714   7
   8  -3   2 0.75357 0.67314   7
   8  -3   2 -0.9855 0.77090   6
  -8  -3  -2 0.08695 0.61408   4
  -8   3  -2 1.05520 0.93742   7
   8   3   2 1.10893 0.90747   6
  -8   3  -2 0.07536 0.31546   4
   8   3   2 -0.5023 0.51311   3
  -8   3  -2 0.75843 0.80637   6
  -8   3  -2 0.25021 0.35197   4
  -8   3  -2 2.60690 1.10407   3
   8   3   2 1.25224 1.07019   4
  -9  -3  -2 -0.0268 0.80282   3
   9  -3   2 1.92650 1.29348   6
   9  -3   2 -0.0326 0.79770   3
  -9  -3  -2 -1.5513 1.08332   7
  -9  -3  -2 2.10559 1.14901   4
  -9  -3  -2 7.02488 2.10810   5
   9  -3   2 -0.1532 0.91246   5
  -9   3  -2 0.12959 1.05241   7
   9   3   2 -0.5997 0.71325   4
   9   3   2 0.11995 0.79459   3
   9   3   2 0.84328 1.11458   6
  -9   3  -2 0.73518 1.04715   6
 -10  -3  -2 1.82138 1.13839   7
 -10  -3  -2 0.92591 1.12030   5
 -10  -3  -2 0.88528 1.06831   3
  10  -3   2 4.60207 1.61048   5
  10  -3   2 -1.2987 0.69220   6
  10  -3   2 -0.3585 0.83332   3
 -10  -3  -2 1.78981 1.02387   4
  10  -3   2 2.64072 1.11455   7
  10   3   2 -0.8120 0.81917   4
 -10   3  -2 1.80602 1.61540   7
  10   3   2 0.01188 0.81284   3
 -10   3  -2 -0.5599 0.77351   3
  10   3   2 0.79923 0.99735   5
  10   3   2 0.96330 1.11208   6
  11  -3   2 92.1315 5.68704   6
 -11  -3  -2 92.6541 4.81172   3
 -11  -3  -2 89.9969 6.15024   5
 -11  -3  -2 93.8089 5.69465   4
 -11  -3  -2 86.6971 5.12842   7
  11  -3   2 85.0519 5.82374   5
 -11   3  -2 79.0213 5.07546   6
  11   3   2 82.9772 5.60294   6
  11   3   2 90.6256 5.47222   4
 -11   3  -2 96.7581 6.73959   7
 -11   3  -2 88.4130 4.91164   3
 -12  -3  -2 35.7406 4.17819   5
  12  -3   2 25.4750 3.56590   6
 -12  -3  -2 31.4562 3.36851   7
 -12  -3  -2 28.8003 2.92862   3
 -12  -3  -2 27.2013 3.86018   4
 -12   3  -2 31.8036 4.45883   7
 -12   3  -2 27.5341 2.92161   3
  12   3   2 33.8046 3.73990   6
  12   3   2 26.8544 3.24918   4
 -13  -3  -2 199.473 10.4566   5
 -13  -3  -2 207.992 7.95237   3
  13  -3   2 224.677 9.90868   6
 -13  -3  -2 187.529 8.81478   7
  13   3   2 199.509 8.96920   4
 -13   3  -2 204.365 8.15135   3
  13   3   2 218.222 9.98075   6
 -13   3  -2 202.354 11.0456   7
 -14  -3  -2 150.792 7.97571   7
 -14  -3  -2 149.570 6.69722   3
  14  -3   2 160.711 8.56624   6
 -14   3  -2 148.762 9.97570   7
  14   3   2 145.983 7.73858   4
  14   3   2 163.059 8.75740   6
 -14   3  -2 154.843 6.84462   3
  15  -3   2 44.0383 4.72108   6
 -15  -3  -2 45.7543 3.68194   3
 -15  -3  -2 37.3545 5.40347   5
 -15  -3  -2 48.1163 4.70542   7
  15   3   2 47.1461 4.99607   6
 -15   3  -2 41.7668 6.09155   7
 -15   3  -2 39.1009 3.52333   3
 -16  -3  -2 67.1947 6.90769   5
  16  -3   2 57.1328 5.57912   6
 -16  -3  -2 56.0839 7.86713   7
 -16  -3  -2 55.5117 3.98156   3
  16   3   2 58.7857 5.81476   6
 -16   3  -2 61.4765 6.78237   7
 -16   3  -2 58.9891 4.03204   3
 -17  -3  -2 3.66325 2.04853   7
 -17  -3  -2 -1.7413 1.13293   3
  17  -3   2 -1.1871 1.73185   6
 -17  -3  -2 -2.8249 1.65218   5
 -17   3  -2 1.61112 2.23706   7
  17   3   2 -1.2246 1.60638   6
  18  -3   2 73.5291 6.79803   6
 -18  -3  -2 66.2753 4.42845   3
 -18  -3  -2 78.5545 6.92388   7
 -18  -3  -2 73.8065 9.05851   5
 -18   3  -2 84.8392 9.27126   7
  18   3   2 66.7552 6.54509   6
 -18  -4   2 -0.9192 1.84323   7
 -18  -4   2 0.22748 2.28675   5
  18  -4  -2 1.25330 1.94004   6
  18   4  -2 3.60689 2.28330   6
 -17  -4   2 28.6659 4.27184   7
 -17  -4   2 32.3708 6.08315   5
  17  -4  -2 23.3677 3.93736   6
  17   4  -2 34.5239 4.74158   4
  17   4  -2 27.2791 4.79120   6
 -17   4   2 33.3408 6.86653   7
 -16  -4   2 157.490 10.7167   5
 -16  -4   2 189.072 9.07446   7
  16  -4  -2 182.033 9.53631   6
 -16  -4   2 173.171 6.23761   3
  16   4  -2 165.263 9.51123   4
  16   4  -2 172.141 9.79072   6
 -16   4   2 158.341 11.0036   7
 -15  -4   2 162.581 10.4790   5
 -15  -4   2 163.389 6.78430   3
 -15  -4   2 159.416 6.29395   3
 -15  -4   2 173.126 8.46780   7
  15  -4  -2 177.778 9.09253   6
 -15   4   2 176.494 11.1463   7
  15   4  -2 168.761 9.38143   6
  15   4  -2 168.623 8.72163   4
  14  -4  -2 94.9703 6.38945   6
 -14  -4   2 105.004 4.92041   3
 -14  -4   2 102.000 7.86436   5
 -14  -4   2 97.4702 5.06605   3
 -14  -4   2 100.300 6.01524   7
 -14   4   2 95.4153 7.89939   7
  14   4  -2 114.658 6.84749   4
  14   4  -2 104.340 7.04772   6
 -13  -4   2 124.963 5.44734   3
 -13  -4   2 122.482 6.37924   7
  13  -4  -2 117.942 6.81990   6
 -13  -4   2 127.787 8.31682   5
 -13   4   2 117.546 8.42339   7
  13   4  -2 127.458 7.54602   6
  13   4  -2 125.134 6.97436   4
 -12  -4   2 23.6913 4.25611   5
  12  -4  -2 23.0585 3.53825   6
 -12  -4   2 19.3706 2.65811   7
 -12  -4   2 22.6124 2.43292   3
 -12   4   2 22.3667 3.00712   6
 -12   4   2 26.4166 4.61795   7
  12   4  -2 23.4796 3.61522   6
  12   4  -2 26.6390 3.92044   4
  11  -4  -2 310.124 11.1253   6
 -11  -4   2 276.110 11.4629   4
  11  -4  -2 307.015 10.2111   3
 -11  -4   2 323.631 12.7786   5
 -11  -4   2 312.921 9.75413   3
 -11  -4   2 310.078 10.2111   7
 -11   4   2 321.483 9.48584   3
  11   4  -2 319.306 11.9568   6
 -11   4   2 293.123 10.7327   6
  11   4  -2 316.593 11.6391   4
 -11   4   2 321.723 13.4655   7
 -10  -4   2 142.760 5.88225   7
 -10  -4   2 149.388 5.84538   3
  10  -4  -2 134.167 5.93752   3
  10  -4  -2 151.964 8.13581   5
 -10  -4   2 129.661 6.98611   4
  10  -4  -2 137.937 7.79120   7
  10  -4  -2 147.754 6.80008   6
 -10  -4   2 139.471 7.56998   5
  10   4  -2 142.347 6.94812   3
  10   4  -2 152.667 7.24008   4
  10   4  -2 139.626 7.24615   6
 -10   4   2 147.126 5.67126   3
 -10   4   2 148.895 6.52068   6
 -10   4   2 133.011 8.00535   7
  -9  -4   2 238.478 9.69709   4
   9  -4  -2 246.138 8.32809   3
   9  -4  -2 242.636 8.86591   6
  -9  -4   2 241.385 8.01905   3
   9  -4  -2 231.254 10.1254   5
  -9  -4   2 233.979 9.77477   5
   9  -4  -2 245.829 9.39719   7
  -9  -4   2 236.319 7.81990   7
   9   4  -2 249.598 9.49238   4
  -9   4   2 244.615 7.89475   3
  -9   4   2 233.565 8.46493   6
   9   4  -2 245.347 9.66166   6
  -9   4   2 247.351 10.7483   7
  -8  -4   2 290.977 10.6132   4
  -8  -4   2 292.467 8.65416   7
   8  -4  -2 295.781 9.76046   6
   8  -4  -2 275.802 10.9873   5
   8  -4  -2 305.174 9.25650   3
  -8  -4   2 298.839 9.10664   3
  -8  -4   2 283.387 10.4968   5
   8  -4  -2 281.784 10.2239   7
  -8   4   2 293.440 8.93617   3
   8   4  -2 280.112 10.3917   6
   8   4  -2 296.180 10.4380   4
  -8   4   2 312.220 11.8235   7
   8   4  -2 274.196 9.96608   3
  -8   4   2 287.634 9.30479   6
   7  -4  -2 90.7340 4.25658   3
  -7  -4   2 89.2712 5.04280   5
   7  -4  -2 90.6649 4.57124   6
   7  -4  -2 97.4864 5.64959   5
  -7  -4   2 94.6869 4.33582   3
  -7  -4   2 96.3194 5.31488   4
   7  -4  -2 96.7564 5.08973   7
  -7   4   2 90.1543 5.66619   7
   7   4  -2 93.8649 5.24406   6
  -7   4   2 95.0126 4.39238   6
  -7   4   2 91.4015 4.19303   3
   7   4  -2 90.3359 5.08200   4
   7   4  -2 99.2754 5.03293   3
  -6  -4   2 22.9175 2.56253   4
  -6  -4   2 25.3759 2.23687   3
  -6  -4   2 24.5238 2.55605   5
   6  -4  -2 28.1920 2.27265   3
   6  -4  -2 30.0718 2.96776   5
  -6   4   2 31.8674 2.36048   3
  -6   4   2 27.4981 2.16775   6
   6   4  -2 30.6617 2.86875   6
   6   4  -2 30.3451 2.59576   3
   6   4  -2 30.5939 3.62820   4
  -6   4   2 29.0057 3.12140   7
   5  -4  -2 22.7812 1.97308   3
  -5  -4   2 25.5355 2.43598   5
  -5  -4   2 19.7382 1.98716   3
  -5  -4   2 27.9442 2.56883   4
  -5   4   2 25.1156 1.21858   4
  -5   4   2 25.9561 1.98832   6
  -5   4   2 25.6529 2.78802   7
   5   4  -2 21.9503 2.35728   4
   5   4  -2 23.1886 2.24162   3
  -4  -4   2 15.2280 2.32404   3
  -4  -4   2 16.0238 1.78491   3
   4  -4  -2 13.5238 1.93037   7
   4  -4  -2 17.7552 1.21999   4
   4  -4  -2 13.4419 1.55996   3
  -4  -4   2 17.2223 2.03864   4
  -4  -4   2 15.7759 1.83921   5
  -4   4   2 12.9510 1.97015   7
  -4   4   2 16.6877 1.18733   4
   4   4  -2 16.1160 1.82932   3
  -4   4   2 14.1220 1.44472   6
   3  -4  -2 28.0382 2.48259   7
   3  -4  -2 27.7157 2.11934   3
  -3  -4   2 26.7645 1.96459   7
   3  -4  -2 27.3702 1.70555   4
  -3  -4   2 27.7201 2.39842   4
  -3  -4   2 31.3168 2.46882   3
  -3  -4   2 26.4803 2.23301   3
  -3   4   2 34.7958 2.86463   7
   3   4  -2 28.4051 2.45370   4
   3   4  -2 27.0083 2.30851   3
  -3   4   2 31.6483 1.79777   4
  -3   4   2 28.8541 2.00691   6
  -2  -4   2 47.6032 2.78829   3
  -2  -4   2 47.0951 2.88398   3
   2  -4  -2 42.9260 4.54625   7
   2  -4  -2 40.8518 2.26514   4
  -2  -4   2 42.6575 2.49062   7
  -2  -4   2 43.2318 2.90355   4
  -2   4   2 43.4743 2.33124   4
  -2   4   2 34.2470 2.81880   7
   2   4  -2 43.3050 2.83149   3
   2   4  -2 45.2361 2.97689   4
   1  -4  -2 373.469 10.5569   3
  -1  -4   2 367.966 10.6624   3
   1  -4  -2 377.682 11.0064   7
   1  -4  -2 379.956 10.0717   4
  -1  -4   2 364.672 10.3949   3
   1  -4  -2 376.316 10.7036   3
  -1  -4   2 367.554 10.1579   7
  -1  -4   2 368.283 10.6123   4
  -1   4   2 383.061 10.0805   4
   1   4  -2 358.550 10.6170   4
  -1   4   2 370.155 11.0806   7
   0  -4  -2 44.6028 2.88817   3
   0  -4   2 49.7698 2.83910   7
   0  -4   2 49.3952 2.82590   4
   0  -4   2 48.5998 2.84396   3
   0  -4  -2 48.9003 3.08645   7
   0  -4  -2 53.1139 2.87742   4
   0   4   2 56.9843 2.98435   4
   0   4  -2 52.6907 3.00920   7
   0   4  -2 52.8151 2.98547   4
   1  -4   2 1365.00 30.0205   4
  -1  -4  -2 1335.06 30.7412   7
   1  -4   2 1302.92 30.7351   3
  -1  -4  -2 1374.20 30.5791   4
   1  -4   2 1304.24 30.3446   7
  -1   4  -2 1313.28 30.0389   4
   1   4   2 1343.33 30.4268   4
  -1   4  -2 1314.47 30.7262   7
  -1   4  -2 1324.40 30.5214   3
   1   4   2 1291.43 30.5128   3
  -2  -4  -2 95.9995 4.47017   4
  -2  -4  -2 100.642 4.49771   7
   2  -4   2 101.466 4.49316   7
   2  -4   2 100.666 3.90941   4
  -2  -4  -2 97.2909 4.45279   3
   2  -4   2 101.365 4.27153   3
  -2   4  -2 96.5690 4.40028   3
   2   4   2 95.9703 4.48968   3
  -2   4  -2 100.755 4.77557   7
  -2   4  -2 99.1755 3.96046   4
   3  -4   2 262.036 8.20879   3
  -3  -4  -2 266.061 8.52972   3
   3  -4   2 282.558 8.80624   7
  -3  -4  -2 261.106 8.76219   4
   3  -4   2 270.120 7.44482   4
  -3   4  -2 263.244 8.46877   3
   3   4   2 276.831 8.85477   3
   3   4   2 268.920 8.77434   4
  -3   4  -2 267.106 7.62251   4
  -3   4  -2 278.389 9.26451   7
   4  -4   2 76.2537 3.69301   3
  -4  -4  -2 75.9076 3.89047   3
  -4  -4  -2 73.8754 4.14081   4
   4  -4   2 69.0952 3.88660   7
  -4   4  -2 78.5945 3.15038   4
  -4   4  -2 79.7436 4.00562   3
  -4   4  -2 78.7214 3.73464   6
  -4   4  -2 77.6125 4.49999   7
   4   4   2 69.1842 3.91518   3
  -5  -4  -2 62.0574 3.52795   3
  -5  -4  -2 60.7928 3.65384   5
  -5  -4  -2 58.2752 3.82933   4
   5  -4   2 61.2821 3.35449   3
   5  -4   2 59.3431 3.65776   7
  -5   4  -2 66.3268 3.50025   6
  -5   4  -2 65.6610 3.70148   3
   5   4   2 60.9682 3.76182   3
  -5   4  -2 61.5800 4.20066   7
   5   4   2 58.1402 3.79984   4
   5   4   2 63.1065 3.89722   6
  -5   4  -2 66.0000 2.69817   4
  -6  -4  -2 724.974 19.6048   4
  -6  -4  -2 695.846 18.5989   3
   6  -4   2 716.738 19.6698   5
   6  -4   2 716.977 18.1216   3
   6  -4   2 730.319 19.1071   7
   6   4   2 726.908 19.2914   6
   6   4   2 704.690 19.1139   3
  -6   4  -2 723.084 18.2818   6
  -6   4  -2 721.468 16.2486   4
  -6   4  -2 701.311 20.1654   7
  -6   4  -2 740.406 18.6086   3
   6   4   2 688.290 19.3014   4
  -7  -4  -2 109.352 5.04963   3
   7  -4   2 115.158 5.57668   7
  -7  -4  -2 113.430 5.58328   5
   7  -4   2 101.754 4.83015   3
   7  -4   2 111.900 6.02619   5
  -7  -4  -2 108.161 5.76509   4
  -7   4  -2 112.717 5.26928   3
   7   4   2 117.260 5.72412   3
  -7   4  -2 108.444 3.37600   4
  -7   4  -2 119.087 6.50723   7
   7   4   2 109.902 5.69294   6
  -7   4  -2 113.553 5.17970   6
   7   4   2 108.631 5.62477   4
   8  -4   2 101.869 4.85853   3
  -8  -4  -2 98.1132 5.69133   4
   8  -4   2 107.546 5.62043   6
  -8  -4  -2 101.474 5.61286   5
  -8  -4  -2 107.946 5.06933   3
   8  -4   2 106.173 6.05125   5
  -8   4  -2 100.323 5.13950   3
   8   4   2 98.7969 5.53663   4
  -8   4  -2 105.508 5.15369   6
   8   4   2 104.741 5.73114   6
  -8   4  -2 107.388 6.49748   7
   8   4   2 101.377 5.57653   3
   9  -4   2 100.750 4.99852   3
  -9  -4  -2 105.377 5.12476   3
  -9  -4  -2 106.803 5.08269   7
  -9  -4  -2 107.619 6.03890   5
   9  -4   2 93.2154 5.37674   7
   9  -4   2 106.128 5.77407   6
  -9   4  -2 98.5989 5.21413   6
   9   4   2 100.223 5.85771   6
   9   4   2 94.2337 5.62580   3
   9   4   2 115.645 6.07078   4
  -9   4  -2 102.684 5.28057   3
  10  -4   2 785.757 21.0365   3
 -10  -4  -2 851.052 21.0702   3
  10  -4   2 800.224 22.3597   6
 -10  -4  -2 811.544 21.0899   7
 -10  -4  -2 771.269 22.8193   4
  10  -4   2 792.539 23.2797   5
 -10  -4  -2 817.722 23.1665   5
 -10   4  -2 796.932 21.1998   3
  10   4   2 839.672 23.0157   6
 -10   4  -2 772.522 21.6140   6
 -10   4  -2 800.220 24.4533   7
  10   4   2 849.286 22.6394   4
  11  -4   2 264.808 10.7254   6
 -11  -4  -2 279.972 9.57363   3
 -11  -4  -2 275.925 9.88840   7
 -11  -4  -2 267.883 11.4582   5
 -11   4  -2 268.842 12.4293   7
  11   4   2 285.084 10.9797   4
 -11   4  -2 270.785 9.77645   3
 -11   4  -2 295.762 15.7659   6
  11   4   2 265.986 11.0486   6
 -12  -4  -2 31.7664 3.33774   7
  12  -4   2 33.2141 4.62455   6
 -12  -4  -2 32.1806 3.21387   3
 -12  -4  -2 29.4629 4.15252   5
 -12   4  -2 34.8747 5.50781   7
  12   4   2 35.0310 3.99589   6
  12   4   2 39.7906 4.02196   4
 -12   4  -2 37.2271 3.41396   3
 -13  -4  -2 215.253 9.20358   7
  13  -4   2 218.568 10.0975   6
 -13  -4  -2 218.152 10.9927   5
 -13  -4  -2 210.610 8.31008   3
 -13   4  -2 219.529 8.63512   3
 -13   4  -2 198.208 12.8682   7
  13   4   2 217.755 14.8688   6
  13   4   2 210.835 9.69914   4
  14  -4   2 112.522 7.39115   6
 -14  -4  -2 134.851 7.24209   7
 -14  -4  -2 123.029 8.55180   5
 -14  -4  -2 127.521 6.19535   3
 -14   4  -2 125.899 6.22343   3
  14   4   2 116.978 7.23014   4
  14   4   2 122.447 7.84769   6
 -14   4  -2 112.028 8.79879   7
  15  -4   2 71.1598 5.92088   6
 -15  -4  -2 72.6667 6.93295   5
 -15  -4  -2 77.4480 4.83184   3
 -15  -4  -2 69.2922 5.57132   7
  15   4   2 63.5123 5.59268   4
 -15   4  -2 81.3412 7.58952   7
  15   4   2 77.6151 6.40394   6
 -15   4  -2 69.7734 4.48369   3
 -16  -4  -2 105.446 8.19170   7
  16  -4   2 99.5636 7.36494   6
 -16  -4  -2 102.857 5.50066   3
 -16  -4  -2 112.779 8.73047   5
 -16   4  -2 87.3681 8.47563   7
  16   4   2 98.2185 7.53923   6
 -16   4  -2 93.1279 5.04653   3
 -17  -4  -2 4.22390 1.61335   3
  17  -4   2 2.19880 2.13212   6
 -17  -4  -2 2.09228 1.94147   7
 -17  -4  -2 0.70025 1.75344   5
 -17   4  -2 4.62259 3.05303   7
  17   4   2 6.66849 2.67314   6
  18  -4   2 2.54969 2.84080   6
 -18  -4  -2 9.76378 3.18847   7
 -18  -4  -2 7.38563 3.21649   5
 -18  -4  -2 10.8614 2.29986   3
 -18   4  -2 14.6090 4.18050   7
  18   4   2 15.4840 3.89770   6
 -18  -5   2 0.06477 2.06174   7
 -18  -5   2 -2.3152 2.73861   5
 -18   5   2 4.25131 3.02343   7
  18   5  -2 3.22906 2.09513   4
  18   5  -2 4.66838 2.53477   6
  17  -5  -2 56.1401 5.78148   6
 -17  -5   2 62.3850 5.52107   7
 -17  -5   2 74.9642 11.5837   5
  17   5  -2 63.0745 5.90299   4
  17   5  -2 71.1022 9.91131   6
 -17   5   2 66.2600 7.49098   7
 -16  -5   2 89.4558 4.57617   3
  16  -5  -2 88.9874 6.86116   6
 -16  -5   2 90.8477 6.18594   7
 -16  -5   2 82.3681 7.93254   5
  16   5  -2 98.7790 7.59492   6
 -16   5   2 100.235 9.12204   7
  16   5  -2 92.7955 6.86465   4
 -15  -5   2 29.1534 3.52345   7
  15  -5  -2 34.1662 5.86690   6
 -15  -5   2 36.1090 3.98258   3
 -15  -5   2 25.1453 5.33885   5
 -15  -5   2 32.7911 2.99315   3
  15   5  -2 30.4935 4.49489   6
  15   5  -2 38.3832 4.53938   4
 -15   5   2 23.6547 4.64373   7
 -14  -5   2 118.067 8.51808   5
 -14  -5   2 109.808 6.00469   3
 -14  -5   2 116.091 6.44413   7
 -14  -5   2 120.057 5.59676   3
  14  -5  -2 120.945 7.35346   6
 -14   5   2 123.340 9.25577   7
  14   5  -2 120.319 7.89944   6
  14   5  -2 115.617 7.44268   4
 -13  -5   2 17.2550 2.63297   3
 -13  -5   2 20.0832 2.85598   7
  13  -5  -2 19.9591 3.37994   6
 -13  -5   2 21.1370 2.66102   3
 -13  -5   2 17.0050 3.88692   5
 -13   5   2 16.2473 4.04515   7
  13   5  -2 19.2255 3.79526   6
  13   5  -2 17.0549 3.27197   4
 -12  -5   2 7.47447 1.72919   3
 -12  -5   2 4.74022 1.51024   7
 -12  -5   2 6.03407 2.43037   5
  12  -5  -2 6.90705 1.95229   6
 -12  -5   2 8.59950 1.82178   3
 -12   5   2 10.7914 3.50221   7
  12   5  -2 9.03940 2.54224   4
  12   5  -2 3.33058 1.76053   6
 -11  -5   2 57.9688 3.79664   7
 -11  -5   2 62.0351 5.34857   5
 -11  -5   2 55.4167 3.76316   3
 -11  -5   2 60.7422 4.16444   3
 -11   5   2 62.6679 4.33908   6
  11   5  -2 62.3410 5.14238   6
  11   5  -2 54.8036 4.80700   4
 -11   5   2 60.4226 5.79583   7
  10  -5  -2 0.67085 0.88169   3
 -10  -5   2 1.92410 1.09866   3
 -10  -5   2 -0.0270 1.19560   5
 -10  -5   2 0.43502 0.78571   7
 -10   5   2 0.59534 1.39688   7
 -10   5   2 2.07835 1.24306   6
  10   5  -2 1.07393 1.20546   4
  10   5  -2 2.33747 1.58347   6
   9  -5  -2 0.72855 0.87290   3
  -9  -5   2 0.72586 0.79819   7
   9  -5  -2 -0.3611 1.08561   5
  -9  -5   2 -0.3385 0.84146   4
  -9  -5   2 -0.0819 1.02641   5
  -9  -5   2 0.51467 0.91614   3
   9   5  -2 -0.6073 0.98750   3
   9   5  -2 0.84927 1.16077   6
  -9   5   2 1.03378 1.25611   7
   9   5  -2 2.57052 1.53618   4
  -8  -5   2 0.28588 1.03844   4
   8  -5  -2 -0.4629 0.75530   3
  -8  -5   2 -0.4398 0.98856   5
   8  -5  -2 -0.4529 1.15973   5
  -8  -5   2 0.17317 0.92827   3
   8  -5  -2 -0.0033 0.87788   7
   8   5  -2 0.89163 1.06871   6
   8   5  -2 0.04645 1.05870   4
   8   5  -2 0.10979 0.97276   3
  -8   5   2 0.01490 1.30919   7
  -8   5   2 0.21303 0.87310   6
  -7  -5   2 6.77228 1.62515   3
  -7  -5   2 5.70938 1.69351   5
  -7  -5   2 7.13322 1.60349   3
   7  -5  -2 2.25672 1.04462   3
   7  -5  -2 4.60902 1.59101   5
  -7  -5   2 3.15431 1.37307   4
  -7   5   2 6.65871 2.38988   7
   7   5  -2 4.96502 1.45445   3
  -7   5   2 7.50041 1.52499   6
   7   5  -2 5.21326 1.63703   4
   7   5  -2 5.42894 1.57634   6
  -6  -5   2 36.0917 3.32114   5
  -6  -5   2 43.9635 3.21286   3
  -6  -5   2 32.5634 3.73179   3
   6  -5  -2 40.4053 3.00321   3
  -6  -5   2 45.8570 3.75141   4
   6  -5  -2 49.0620 3.81716   7
   6   5  -2 36.6984 3.51033   4
  -6   5   2 46.3953 4.22160   7
  -6   5   2 41.2757 1.74267   4
   6   5  -2 37.2997 3.61116   6
   6   5  -2 37.4314 3.27216   3
  -6   5   2 41.1424 2.86093   6
  -5  -5   2 1424.89 34.9044   4
   5  -5  -2 1448.18 34.9290   7
  -5  -5   2 1394.52 33.9819   3
   5  -5  -2 1504.86 31.2500   4
  -5  -5   2 1423.14 33.7891   3
  -5  -5   2 1426.65 34.2496   5
   5  -5  -2 1459.00 33.5460   3
  -5   5   2 1492.62 31.3868   4
  -5   5   2 1470.74 32.9792   6
   5   5  -2 1400.57 34.7456   4
   5   5  -2 1420.12 34.4140   3
  -5   5   2 1415.01 35.9033   7
  -4  -5   2 442.780 12.7981   3
  -4  -5   2 454.807 12.3170   7
   4  -5  -2 451.030 13.6825   7
  -4  -5   2 459.406 13.6768   4
  -4  -5   2 436.530 12.7569   3
   4  -5  -2 443.220 11.1759   4
   4  -5  -2 435.700 12.5470   3
  -4   5   2 444.257 12.0447   6
   4   5  -2 432.172 13.1921   3
  -4   5   2 428.461 11.1012   4
   3  -5  -2 114.472 5.12964   3
  -3  -5   2 122.247 5.70497   4
   3  -5  -2 120.767 5.81471   7
  -3  -5   2 117.814 4.97758   7
  -3  -5   2 122.651 5.34875   3
   3  -5  -2 126.229 4.60997   4
  -3  -5   2 130.152 5.59182   3
  -3   5   2 121.122 6.14365   7
   3   5  -2 117.117 5.54462   3
   3   5  -2 124.851 5.81078   4
  -3   5   2 129.887 4.65049   4
   2  -5  -2 48.3286 3.38892   3
  -2  -5   2 43.5346 3.17901   3
  -2  -5   2 46.0779 3.06372   3
   2  -5  -2 42.5161 2.92340   3
   2  -5  -2 43.2015 3.29028   7
   2  -5  -2 44.8519 2.69294   4
  -2  -5   2 42.3144 3.11522   4
  -2  -5   2 44.2730 2.89988   7
   2   5  -2 43.5342 3.16387   3
  -2   5   2 52.5238 2.86773   4
  -2   5   2 44.9454 3.50685   7
   1  -5  -2 1095.25 27.2904   7
   1  -5  -2 1100.61 26.5998   3
  -1  -5   2 1133.85 26.4520   7
  -1  -5   2 1152.28 27.2355   3
   1  -5  -2 1126.46 26.2249   4
  -1  -5   2 1119.96 26.6668   3
   1  -5  -2 1107.77 27.1307   3
  -1  -5   2 1104.26 26.8517   4
   1   5  -2 1106.14 26.9670   4
  -1   5   2 1091.75 26.0863   4
  -1   5   2 1138.05 27.5979   7
   0  -5  -2 1938.10 43.8486   3
   0  -5   2 1940.54 43.9421   3
   0  -5   2 1920.66 43.3969   7
   0  -5  -2 1942.10 44.0078   7
   0  -5  -2 1921.20 43.3940   3
   0  -5  -2 1945.80 43.1733   4
   0  -5   2 1906.86 43.2558   3
   0  -5   2 1901.31 43.2102   4
   0   5  -2 1941.33 43.3660   4
   0   5  -2 1901.27 43.4899   7
   0   5   2 1904.40 43.0575   4
  -1  -5  -2 189.714 7.20533   7
  -1  -5  -2 176.707 6.82438   4
   1  -5   2 188.752 7.28658   3
  -1  -5  -2 177.152 7.01996   3
   1  -5   2 185.825 6.77449   3
   1  -5   2 183.225 6.85664   7
  -1   5  -2 181.637 6.64985   4
   1   5   2 194.382 6.99921   4
   1   5   2 179.843 6.94826   3
  -1   5  -2 187.163 7.24113   7
   2  -5   2 6.16266 1.16726   4
  -2  -5  -2 4.69708 1.35728   3
   2  -5   2 5.78313 1.39340   3
  -2  -5  -2 5.50964 1.33855   4
   2  -5   2 6.42346 1.34117   7
  -2  -5  -2 8.22696 1.76238   7
  -2   5  -2 4.49029 1.43630   7
  -2   5  -2 6.27741 1.47182   3
  -2   5  -2 5.68544 1.24280   4
   2   5   2 6.95042 1.49328   3
   2   5   2 6.51525 1.60649   4
  -3  -5  -2 0.31279 0.79428   3
   3  -5   2 1.21411 0.83474   3
  -3  -5  -2 0.18434 0.63775   4
   3  -5   2 0.02078 0.54783   4
   3  -5   2 0.55990 0.66263   7
  -3  -5  -2 0.79794 0.82327   7
   3   5   2 -0.0434 0.72937   4
  -3   5  -2 -0.6055 0.40389   6
   3   5   2 0.73705 0.83200   3
  -3   5  -2 0.58269 0.75279   3
  -3   5  -2 0.51674 0.64018   4
  -3   5  -2 0.18382 0.92866   7
   4  -5   2 265.602 8.70677   3
  -4  -5  -2 243.074 10.2219   3
  -4  -5  -2 261.679 9.43219   4
   4  -5   2 267.849 9.22217   7
  -4   5  -2 264.260 9.02792   3
  -4   5  -2 264.085 7.79071   4
   4   5   2 260.454 9.29857   3
  -4   5  -2 247.194 11.1014   7
  -4   5  -2 268.900 8.63554   6
   4   5   2 259.461 9.32734   4
   5  -5   2 1062.23 26.0685   7
  -5  -5  -2 1026.63 25.3830   3
  -5  -5  -2 1004.53 25.5857   5
  -5  -5  -2 1033.30 26.4557   4
   5  -5   2 1021.35 25.0721   3
   5   5   2 996.126 25.9670   6
   5   5   2 1028.85 26.2552   4
  -5   5  -2 1036.99 25.0388   6
  -5   5  -2 1063.15 27.3985   7
  -5   5  -2 1049.81 23.5587   4
   5   5   2 1000.95 26.0478   3
  -6  -5  -2 105.791 5.17568   3
   6  -5   2 95.5172 4.79447   3
   6  -5   2 107.338 5.51323   7
  -6  -5  -2 97.2968 5.25457   5
  -6   5  -2 100.952 5.20455   3
  -6   5  -2 99.8618 3.71134   4
   6   5   2 101.084 5.45604   3
  -6   5  -2 94.2763 4.72622   6
  -6   5  -2 104.816 6.25340   7
   7  -5   2 62.0348 5.04722   7
  -7  -5  -2 66.6703 4.44491   5
  -7  -5  -2 70.9361 6.07940   4
  -7  -5  -2 70.2600 4.20893   3
   7  -5   2 64.5940 4.71124   5
   7  -5   2 64.8585 3.93142   3
  -7   5  -2 65.3200 2.59821   4
  -7   5  -2 65.9944 3.99144   6
   7   5   2 66.4610 4.64515   6
  -7   5  -2 69.5996 5.26758   7
   7   5   2 66.0936 4.68121   4
  -7   5  -2 63.9935 4.18540   3
  -8  -5  -2 396.553 13.7494   4
   8  -5   2 404.297 14.1667   5
   8  -5   2 380.782 12.8788   7
   8  -5   2 380.918 11.9963   3
  -8  -5  -2 382.260 12.9964   5
  -8  -5  -2 402.121 12.2391   3
  -8   5  -2 401.358 12.4828   3
   8   5   2 397.383 13.3853   4
   8   5   2 371.500 13.1105   6
  -8   5  -2 392.765 12.2473   6
   8   5   2 376.042 13.1683   3
  -9  -5  -2 53.1762 3.84731   3
  -9  -5  -2 61.9453 4.70539   5
   9  -5   2 61.1924 3.92269   3
   9  -5   2 60.0017 4.93752   5
  -9  -5  -2 46.2356 4.45887   4
  -9   5  -2 53.8895 5.11061   7
   9   5   2 55.9183 4.58314   6
   9   5   2 56.4732 4.57367   4
  -9   5  -2 56.8733 3.95737   6
  -9   5  -2 63.2775 4.22603   3
 -10  -5  -2 289.454 11.3306   5
 -10  -5  -2 265.007 9.39617   7
 -10  -5  -2 270.001 9.62279   3
  10   5   2 273.283 11.1101   6
 -10   5  -2 266.529 10.0586   6
 -10   5  -2 265.495 12.3350   7
 -10   5  -2 264.351 9.83674   3
  10   5   2 266.565 10.8308   4
  11  -5   2 51.6572 4.56400   6
 -11  -5  -2 41.4666 4.51575   5
 -11  -5  -2 37.3297 3.43774   3
 -11  -5  -2 44.6602 3.63227   7
  11   5   2 39.4458 4.27341   6
 -11   5  -2 47.1411 5.26554   7
 -11   5  -2 43.3368 3.76579   3
  11   5   2 46.0288 4.39226   4
 -12  -5  -2 27.4160 3.05127   7
 -12  -5  -2 27.2844 2.99428   3
 -12  -5  -2 21.3132 3.80057   5
  12  -5   2 25.8417 3.92926   6
  12   5   2 21.9848 3.68632   6
 -12   5  -2 29.0683 3.17193   3
 -12   5  -2 18.6789 3.94480   7
  12   5   2 20.8095 3.34219   4
 -13  -5  -2 50.7306 4.31033   7
 -13  -5  -2 53.4071 4.10931   3
  13  -5   2 43.2825 4.60747   6
 -13  -5  -2 56.9620 5.67342   5
 -13   5  -2 57.3937 4.29415   3
  13   5   2 55.6865 5.09045   4
  13   5   2 62.4316 5.45656   6
 -13   5  -2 53.3643 6.03627   7
 -14  -5  -2 213.367 8.56530   3
 -14  -5  -2 197.849 9.10946   7
  14  -5   2 214.674 10.8828   6
 -14  -5  -2 209.561 11.3814   5
  14   5   2 193.240 9.97024   4
  14   5   2 216.679 10.7486   6
 -14   5  -2 220.661 8.74819   3
 -14   5  -2 202.433 12.2218   7
 -15  -5  -2 45.9447 3.95584   3
 -15  -5  -2 46.7790 4.49442   7
  15  -5   2 46.1134 5.05984   6
 -15  -5  -2 43.6854 6.11283   5
  15   5   2 53.5340 5.23558   4
  15   5   2 47.9547 5.37931   6
 -15   5  -2 39.9998 5.96850   7
 -16  -5  -2 107.750 6.98811   7
  16  -5   2 81.3003 6.95365   6
 -16  -5  -2 96.8430 5.54168   3
 -16  -5  -2 94.8567 8.32948   5
  16   5   2 96.6372 7.08044   4
 -16   5  -2 101.865 9.21122   7
  16   5   2 94.7141 7.52594   6
 -17  -5  -2 58.6742 8.22724   5
  17  -5   2 61.0593 6.49645   6
 -17  -5  -2 68.9750 4.66601   3
 -17  -5  -2 68.6298 5.82054   7
 -17   5  -2 60.9635 12.1475   7
  17   5   2 76.3048 6.93298   6
 -17  -6   2 46.0436 4.91232   7
 -17  -6   2 34.4131 6.53547   5
  17   6  -2 48.0166 6.84540   6
  17   6  -2 43.3915 6.00665   4
 -17   6   2 37.6221 6.93110   7
 -16  -6   2 9.90550 2.45810   7
 -16  -6   2 5.30545 2.89778   5
 -16  -6   2 6.31696 1.70426   3
  16   6  -2 8.50027 3.09588   6
  16   6  -2 11.5212 3.56727   4
 -16   6   2 1.92983 2.69806   7
 -15  -6   2 22.2943 3.33583   7
 -15  -6   2 22.5940 2.73755   3
 -15  -6   2 26.0713 4.84836   5
  15   6  -2 24.6159 4.68921   6
  15   6  -2 23.6902 4.16080   4
 -15   6   2 16.0965 4.34915   7
 -14  -6   2 9.16225 2.79567   3
 -14  -6   2 9.20664 2.16115   7
 -14  -6   2 9.93500 2.97172   5
 -14  -6   2 7.12332 1.85791   3
  14   6  -2 8.12903 2.60703   6
 -14   6   2 5.94757 2.74878   7
  14   6  -2 9.85450 2.77929   4
 -13  -6   2 2.53404 1.65008   3
 -13  -6   2 -0.2088 1.66054   5
 -13  -6   2 1.19634 1.13909   3
 -13  -6   2 0.26547 1.12484   7
  13   6  -2 2.54549 1.66009   6
  13   6  -2 -1.4285 1.28680   4
 -13   6   2 2.55816 2.35499   7
 -12  -6   2 134.916 7.39670   3
 -12  -6   2 124.521 6.02276   3
 -12  -6   2 138.101 6.23138   7
 -12  -6   2 121.470 8.13838   5
 -12   6   2 136.359 9.36185   7
  12   6  -2 141.737 8.21948   6
  12   6  -2 123.798 7.73962   4
 -11  -6   2 353.882 10.9556   7
 -11  -6   2 342.361 13.9633   5
 -11  -6   2 356.112 11.4851   3
  11   6  -2 358.504 13.8959   6
 -11   6   2 368.275 15.8187   7
  11   6  -2 334.505 13.5167   4
 -10  -6   2 194.787 7.85230   3
 -10  -6   2 197.449 8.43220   3
 -10  -6   2 214.610 9.96733   5
  10   6  -2 206.280 9.72282   6
 -10   6   2 194.734 8.13125   6
  10   6  -2 221.103 9.96949   4
 -10   6   2 188.764 10.6405   7
  -9  -6   2 62.3142 4.50097   3
  -9  -6   2 72.3296 5.54969   5
  -9  -6   2 72.4868 4.44659   3
  -9   6   2 69.8600 6.19431   7
   9   6  -2 73.9724 5.48652   6
   9   6  -2 79.9351 5.65907   4
  -9   6   2 76.8648 4.52336   6
  -8  -6   2 191.861 8.69152   5
  -8  -6   2 191.243 7.51691   3
   8  -6  -2 175.170 7.39385   3
  -8  -6   2 176.457 7.71315   3
   8   6  -2 172.595 8.53510   4
   8   6  -2 190.563 8.86185   6
  -8   6   2 186.943 9.78605   7
  -8   6   2 179.929 7.24284   6
  -7  -6   2 153.767 6.68071   3
  -7  -6   2 157.890 7.48025   5
   7  -6  -2 144.777 6.45252   3
   7  -6  -2 146.834 7.33688   7
  -7  -6   2 158.364 7.82398   4
  -7  -6   2 136.833 6.56491   3
   7   6  -2 155.058 7.72380   6
   7   6  -2 147.032 7.34840   3
  -7   6   2 144.444 8.35413   7
  -7   6   2 141.004 6.08395   6
   7   6  -2 154.741 7.68611   4
  -6  -6   2 1984.01 46.2203   3
   6  -6  -2 1990.25 45.8552   3
  -6  -6   2 1914.76 46.6376   5
  -6  -6   2 2020.85 45.3773   7
  -6  -6   2 2031.06 47.8721   4
   6  -6  -2 2091.50 47.7045   7
  -6  -6   2 2072.90 46.0290   3
  -6   6   2 1940.68 48.8720   7
   6   6  -2 1950.96 47.0808   3
  -6   6   2 2021.59 45.1245   6
   6   6  -2 1985.50 47.4748   4
  -6   6   2 1989.04 42.8911   4
   5  -6  -2 1948.35 45.9202   3
  -5  -6   2 2017.25 46.4490   3
  -5  -6   2 2058.30 45.6691   7
   5  -6  -2 2041.53 43.7281   4
  -5  -6   2 2083.76 46.4540   3
   5  -6  -2 2019.92 47.5845   7
  -5  -6   2 1995.37 46.8520   5
  -5  -6   2 2029.31 47.9328   4
   5   6  -2 1918.77 47.0728   3
  -5   6   2 2092.13 49.0886   7
  -5   6   2 2047.38 43.8905   4
   5   6  -2 1954.40 47.3803   4
  -5   6   2 1992.53 45.2389   6
   4  -6  -2 916.172 21.1764   4
  -4  -6   2 898.881 23.0143   3
  -4  -6   2 891.408 22.9252   3
   4  -6  -2 887.366 22.6893   3
   4  -6  -2 888.025 23.8879   7
  -4  -6   2 881.505 23.7971   4
  -4  -6   2 890.295 22.3065   7
  -4   6   2 886.574 21.9887   6
   4   6  -2 891.936 23.7815   4
  -4   6   2 868.934 21.0270   4
   4   6  -2 856.162 23.4406   3
  -4   6   2 899.070 24.8430   7
   3  -6  -2 883.992 23.6817   7
   3  -6  -2 866.471 21.5872   4
  -3  -6   2 892.981 22.2901   7
  -3  -6   2 879.371 23.4494   4
   3  -6  -2 873.692 22.6205   3
   3  -6  -2 912.086 23.5661   3
  -3  -6   2 890.682 23.0738   3
  -3  -6   2 880.715 22.8011   3
   3   6  -2 838.653 23.1840   3
  -3   6   2 904.939 21.5594   4
   3   6  -2 923.052 23.6703   4
  -3   6   2 928.184 24.5889   7
   2  -6  -2 697.083 19.3054   7
   2  -6  -2 682.482 17.6575   4
  -2  -6   2 682.296 18.8246   3
  -2  -6   2 664.603 18.7658   4
   2  -6  -2 721.610 19.2753   3
  -2  -6   2 686.428 18.1153   7
  -2  -6   2 684.397 18.5122   3
   2  -6  -2 676.789 18.3652   3
   2   6  -2 675.925 18.9035   3
   2   6  -2 695.157 18.9931   4
  -2   6   2 694.433 19.7601   7
  -2   6   2 691.226 17.6579   4
   1  -6  -2 8.21470 1.56378   4
   1  -6  -2 7.84576 1.74547   3
  -1  -6   2 8.16314 1.71488   3
   1  -6  -2 7.30411 1.52929   7
   1  -6  -2 6.70162 1.59242   3
  -1  -6   2 6.98187 1.53070   7
  -1  -6   2 8.05112 1.81850   4
  -1  -6   2 6.77242 1.62452   3
   1   6  -2 7.83114 1.86207   4
  -1   6   2 5.45068 1.43061   7
  -1   6   2 9.03766 1.60605   4
   0  -6   2 90.6339 4.74606   7
   0  -6  -2 92.0119 5.10607   7
   0  -6   2 87.1696 4.66473   3
   0  -6   2 87.4101 5.09389   3
   0  -6   2 89.2033 4.66328   4
   0  -6  -2 90.1411 4.79594   3
   0  -6  -2 91.2856 4.69591   4
   0  -6  -2 89.2468 5.04255   3
   0   6  -2 81.4774 4.70352   7
   0   6  -2 94.3692 4.90419   4
   0   6   2 87.6393 4.65032   4
  -1  -6  -2 438.001 13.4109   7
  -1  -6  -2 429.310 13.0807   4
  -1  -6  -2 406.891 12.8784   3
   1  -6   2 436.990 13.0332   7
   1  -6   2 434.136 12.6015   4
   1  -6   2 442.683 12.9197   3
  -1   6  -2 435.198 12.7375   4
   1   6   2 418.573 13.0725   3
   1   6   2 431.863 13.0176   4
  -1   6  -2 422.704 13.4045   7
   2  -6   2 108.026 5.79264   3
   2  -6   2 106.127 5.37241   7
  -2  -6  -2 107.639 5.39178   3
  -2  -6  -2 97.1991 5.28487   4
   2  -6   2 104.246 5.13196   3
  -2  -6  -2 117.985 5.83184   3
   2  -6   2 103.288 4.78304   4
  -2  -6  -2 102.355 5.42052   7
  -2   6  -2 103.613 4.91981   4
   2   6   2 100.838 5.35260   4
   2   6   2 100.259 5.37867   3
  -2   6  -2 94.1852 5.54414   7
  -3  -6  -2 795.776 21.0099   7
   3  -6   2 804.567 21.1504   7
  -3  -6  -2 788.118 21.3181   4
   3  -6   2 783.035 20.4759   3
  -3  -6  -2 779.217 21.0421   3
   3  -6   2 782.395 19.4508   4
   3   6   2 774.471 21.2587   3
  -3   6  -2 796.823 19.7776   4
  -3   6  -2 757.898 20.2557   6
   3   6   2 777.209 21.1838   4
  -3   6  -2 805.974 22.0925   7
  -4  -6  -2 406.021 12.9452   3
  -4  -6  -2 419.193 13.6204   4
   4  -6   2 428.157 13.3212   7
  -4  -6  -2 424.215 13.0025   7
   4  -6   2 403.554 12.5486   3
   4   6   2 412.676 13.4961   3
  -4   6  -2 423.643 13.1358   3
  -4   6  -2 411.029 11.6193   4
  -4   6  -2 403.493 12.3625   6
   4   6   2 413.311 13.3597   4
  -4   6  -2 420.896 14.2555   7
   5  -6   2 1456.66 34.9874   3
  -5  -6  -2 1468.50 35.4327   3
  -5  -6  -2 1444.81 35.6927   5
   5  -6   2 1470.84 35.9348   7
  -5   6  -2 1501.45 37.6350   7
  -5   6  -2 1513.24 33.4616   4
  -5   6  -2 1494.65 35.6421   3
   5   6   2 1506.40 36.5006   6
  -5   6  -2 1467.67 34.8051   6
   5   6   2 1457.46 36.3464   4
   6  -6   2 899.765 23.1136   3
   6  -6   2 884.955 24.0564   7
  -6  -6  -2 901.692 23.9110   5
  -6  -6  -2 907.697 23.4758   3
  -6  -6  -2 916.456 24.9243   4
   6   6   2 949.751 24.7700   4
   6   6   2 877.236 24.2080   6
  -6   6  -2 907.112 23.6802   3
  -6   6  -2 877.311 25.5822   7
  -6   6  -2 902.200 22.9570   6
   6   6   2 850.178 24.2423   3
  -6   6  -2 897.542 21.0456   4
  -7  -6  -2 3.12674 1.33134   5
   7  -6   2 0.95957 1.13148   3
   7  -6   2 3.68725 1.46113   7
  -7  -6  -2 3.70595 1.40656   4
  -7  -6  -2 1.24838 1.23559   3
  -7   6  -2 0.52258 1.05378   3
   7   6   2 2.23465 1.39003   4
  -7   6  -2 2.58704 1.32491   7
  -7   6  -2 3.82896 1.27172   6
   7   6   2 1.26037 1.42510   6
  -7   6  -2 2.91152 0.76975   4
   7   6   2 1.86503 0.93177   3
  -8  -6  -2 8.95347 2.26309   5
   8  -6   2 8.92767 2.23994   5
  -8  -6  -2 11.4717 2.24198   3
  -8   6  -2 9.11525 2.18430   3
  -8   6  -2 4.98528 1.78040   7
   8   6   2 7.81664 2.25104   4
   8   6   2 8.75048 2.26008   6
  -9  -6  -2 11.9934 2.26888   3
  -9  -6  -2 16.2932 3.09378   5
   9   6   2 15.6340 3.20329   4
  -9   6  -2 16.4700 2.34462   6
   9   6   2 15.1485 2.87278   6
  -9   6  -2 14.6372 2.59265   3
  -9   6  -2 16.5285 4.02763   7
 -10  -6  -2 58.9952 4.29724   3
 -10  -6  -2 52.8577 4.77415   5
 -10  -6  -2 55.8399 3.89272   7
  10   6   2 56.3396 4.98077   6
  10   6   2 52.3944 4.80426   4
 -10   6  -2 62.3674 4.58816   3
 -10   6  -2 59.2901 5.85679   7
 -11  -6  -2 63.5164 5.52085   5
 -11  -6  -2 56.6758 4.34592   3
 -11  -6  -2 66.4440 4.36506   7
 -11   6  -2 55.0041 4.38273   3
  11   6   2 63.0259 5.34236   4
  11   6   2 54.6402 5.07645   6
 -11   6  -2 62.6070 6.21490   7
 -12  -6  -2 24.7887 3.27370   3
 -12  -6  -2 28.8049 3.11535   7
 -12  -6  -2 22.9029 3.91753   5
  12   6   2 20.4719 4.21545   4
 -12   6  -2 27.7126 3.27843   3
 -12   6  -2 29.7377 5.58263   7
  12   6   2 23.8793 3.72717   6
 -13  -6  -2 42.0899 3.81129   7
 -13  -6  -2 42.7416 5.98715   5
 -13  -6  -2 39.9767 3.77929   3
  13   6   2 29.5363 4.56420   6
 -13   6  -2 34.3241 5.62701   7
  13   6   2 36.6343 4.47180   4
 -14  -6  -2 3.26793 2.20529   5
 -14  -6  -2 4.08917 1.90818   7
 -14  -6  -2 3.42823 1.74515   3
  14   6   2 3.90170 2.23612   4
 -14   6  -2 5.85809 3.36704   7
  14   6   2 3.59187 2.31640   6
 -15  -6  -2 6.30557 2.00102   7
 -15  -6  -2 8.99004 3.50770   5
 -15  -6  -2 6.27108 2.45545   3
  15   6   2 5.00918 2.75191   4
 -15   6  -2 5.16474 3.21140   7
  15   6   2 3.76449 2.23319   6
 -16  -6  -2 3.59565 2.35415   5
 -16  -6  -2 -0.0056 1.34612   3
 -16  -6  -2 1.09567 1.75892   7
 -16   6  -2 -0.5303 2.16190   7
  16   6   2 -1.9416 1.87760   4
 -17  -6  -2 15.6951 4.32739   5
 -17  -6  -2 15.6907 2.66868   3
 -17  -6  -2 23.0212 3.86406   7
  17   6   2 15.7784 3.76801   6
  17   6   2 16.2705 3.81910   4
 -17   6  -2 8.95252 3.97093   7
 -16  -7   2 33.4759 4.15390   7
 -16  -7   2 37.7334 3.52306   3
 -16  -7   2 31.2291 5.87870   5
  16   7  -2 28.4932 4.83984   4
 -16   7   2 42.8258 7.11351   7
  16   7  -2 37.0066 6.04944   6
 -15  -7   2 187.337 7.71943   3
 -15  -7   2 202.102 12.2129   5
 -15  -7   2 204.486 8.72760   7
  15   7  -2 205.646 11.3953   6
 -15   7   2 197.203 13.5725   7
  15   7  -2 205.209 11.1057   4
 -14  -7   2 150.644 9.99913   5
 -14  -7   2 142.589 6.86365   7
 -14  -7   2 142.789 6.66647   3
  14   7  -2 140.266 9.32343   6
 -14   7   2 154.965 11.2207   7
  14   7  -2 143.679 9.01446   4
 -13  -7   2 114.569 8.34343   5
 -13  -7   2 106.208 5.69497   7
 -13  -7   2 96.3760 5.55635   3
 -13   7   2 106.526 9.05707   7
  13   7  -2 110.096 7.68985   4
  13   7  -2 114.121 7.85013   6
 -12  -7   2 40.9065 3.41717   7
 -12  -7   2 34.6509 3.44492   3
 -12  -7   2 41.7035 5.00962   5
  12   7  -2 45.0102 5.07210   4
 -12   7   2 39.8277 6.47984   7
  12   7  -2 40.5029 4.67791   6
 -11  -7   2 71.4496 5.41337   3
 -11  -7   2 70.6569 4.78916   3
 -11  -7   2 83.1261 4.60140   7
 -11  -7   2 85.3830 6.64467   5
 -11   7   2 82.8820 7.53067   7
  11   7  -2 89.9345 7.38851   4
  11   7  -2 91.5856 6.72341   6
 -10  -7   2 230.810 11.1207   5
 -10  -7   2 253.797 9.60777   3
 -10  -7   2 249.884 10.1586   3
 -10  -7   2 261.987 8.72259   7
  10   7  -2 266.428 11.6704   6
  10   7  -2 256.827 11.5135   4
 -10   7   2 246.929 12.8872   7
  -9  -7   2 418.214 13.3063   7
  -9  -7   2 397.357 13.7951   3
  -9  -7   2 420.516 15.0625   5
  -9  -7   2 427.229 13.4297   3
   9   7  -2 420.150 15.3804   6
  -9   7   2 429.922 17.1902   7
   9   7  -2 425.634 15.4894   4
  -9   7   2 398.292 13.0723   6
  -8  -7   2 124.416 6.63436   3
  -8  -7   2 120.006 5.98633   7
  -8  -7   2 133.243 6.45185   3
  -8  -7   2 117.988 6.98819   5
  -8   7   2 125.768 6.84247   6
   8   7  -2 118.207 7.33213   4
   8   7  -2 132.906 7.61082   6
  -8   7   2 120.288 8.16317   7
  -7  -7   2 186.658 7.61568   7
  -7  -7   2 178.928 8.58945   5
  -7  -7   2 193.012 7.99995   3
  -7  -7   2 178.719 8.07682   3
  -7   7   2 184.791 5.49309   4
  -7   7   2 177.547 9.83033   7
  -7   7   2 186.130 7.42767   6
   7   7  -2 192.841 9.26079   6
   7   7  -2 201.300 9.35387   4
  -6  -7   2 69.1943 5.03437   5
  -6  -7   2 63.1658 4.45750   3
  -6  -7   2 62.6117 4.49347   3
   6  -7  -2 51.9074 4.02667   3
  -6  -7   2 64.1654 4.08948   7
  -6   7   2 61.0125 3.08801   4
  -6   7   2 72.9457 5.87291   7
  -6   7   2 59.8390 3.89451   6
   6   7  -2 61.6953 5.01482   4
  -5  -7   2 629.822 17.6337   3
   5  -7  -2 585.075 18.2797   7
   5  -7  -2 577.934 17.0693   3
   5  -7  -2 589.928 15.0883   4
  -5  -7   2 586.796 17.8752   5
  -5  -7   2 600.595 18.5463   4
  -5  -7   2 587.663 16.6363   7
   5   7  -2 581.592 18.2510   4
  -5   7   2 610.446 19.6840   7
   5   7  -2 567.732 18.0199   3
  -5   7   2 592.961 16.3888   6
  -5   7   2 603.948 15.3180   4
  -4  -7   2 243.318 8.93447   7
   4  -7  -2 244.978 8.12382   4
   4  -7  -2 249.710 9.41037   3
  -4  -7   2 257.374 9.80276   3
  -4  -7   2 247.706 9.76810   3
  -4  -7   2 238.974 10.0038   4
   4  -7  -2 267.684 10.4386   3
   4  -7  -2 248.801 10.1554   7
   4   7  -2 260.201 10.3221   4
   4   7  -2 250.838 10.1084   3
  -4   7   2 241.444 10.7719   7
  -4   7   2 250.869 8.29121   4
  -4   7   2 240.464 8.76049   6
  -3  -7   2 28.7051 3.18978   3
   3  -7  -2 30.5370 2.57435   4
  -3  -7   2 24.1418 4.15450   4
   3  -7  -2 26.9166 2.79411   3
  -3  -7   2 24.9001 2.80077   3
   3  -7  -2 29.3167 3.91989   7
   3  -7  -2 32.7254 3.51433   3
  -3  -7   2 27.2947 2.77099   7
  -3   7   2 28.4534 2.53597   4
   3   7  -2 27.8233 3.21521   4
   3   7  -2 25.2296 2.91889   3
  -3   7   2 22.8742 3.15005   7
  -2  -7   2 194.997 8.11577   3
   2  -7  -2 199.006 7.59013   4
   2  -7  -2 201.657 8.72526   7
   2  -7  -2 214.635 9.01614   3
  -2  -7   2 211.515 8.09456   7
  -2  -7   2 197.646 8.54899   3
  -2  -7   2 185.256 8.28066   4
   2   7  -2 204.738 8.66262   4
  -2   7   2 206.945 9.17858   7
  -2   7   2 206.615 7.71477   4
   1  -7  -2 34.9211 3.59029   3
   1  -7  -2 43.8645 3.34250   4
   1  -7  -2 41.5496 3.66769   7
   1  -7  -2 41.8330 4.38856   3
  -1  -7   2 45.8357 3.59119   3
  -1  -7   2 44.5300 3.97935   3
  -1  -7   2 43.4948 3.57895   4
  -1  -7   2 49.2638 3.55642   7
   1   7  -2 37.4105 3.47791   4
   0  -7  -2 190.498 8.28203   7
   0  -7  -2 189.451 9.01785   3
   0  -7   2 189.879 7.80514   7
   0  -7   2 200.943 8.65583   3
   0  -7  -2 190.063 8.37683   3
   0  -7  -2 188.087 7.77136   4
   0  -7   2 178.098 7.65839   3
   0  -7   2 183.000 7.71606   4
   0   7   2 199.392 7.93348   4
   0   7  -2 202.711 8.12766   4
   1  -7   2 2.33407 1.22102   7
   1  -7   2 1.21085 1.29516   3
  -1  -7  -2 -0.1851 0.88925   4
  -1  -7  -2 2.53459 1.23991   7
  -1  -7  -2 1.34120 1.69271   3
   1  -7   2 4.58415 1.36451   4
   1  -7   2 0.91626 1.12954   3
  -1  -7  -2 1.17008 1.04230   3
   1   7   2 1.83042 1.12883   4
  -1   7  -2 1.50144 1.27085   7
  -1   7  -2 1.43977 1.08981   4
  -2  -7  -2 494.311 15.1068   7
   2  -7   2 459.226 14.5576   3
  -2  -7  -2 476.478 14.9860   4
  -2  -7  -2 473.440 15.0745   3
   2  -7   2 482.653 14.7856   7
   2  -7   2 496.734 15.6095   3
   2  -7   2 461.580 13.7268   4
   2   7   2 457.660 15.2059   3
  -2   7  -2 481.028 14.0852   4
  -2   7  -2 480.412 15.5520   7
   2   7   2 458.902 14.7456   4
  -3  -7  -2 200.467 8.35611   3
  -3  -7  -2 179.636 9.41993   4
  -3  -7  -2 190.987 8.37670   3
  -3  -7  -2 203.558 8.42749   7
   3  -7   2 198.104 7.24794   4
   3  -7   2 187.999 8.68843   3
   3  -7   2 180.319 7.71879   3
   3  -7   2 196.093 8.31241   7
   3   7   2 196.920 8.45244   4
  -3   7  -2 197.519 9.08915   7
   3   7   2 186.326 8.36588   3
  -3   7  -2 185.025 7.31763   4
  -3   7  -2 189.018 7.81001   6
   4  -7   2 740.051 20.3079   3
  -4  -7  -2 751.951 21.5541   4
   4  -7   2 745.425 21.0671   7
   4  -7   2 732.742 18.7883   4
  -4  -7  -2 726.301 20.7634   3
  -4  -7  -2 754.508 20.9465   3
  -4  -7  -2 758.950 20.8304   7
   4   7   2 744.631 21.2874   4
  -4   7  -2 769.874 22.4187   7
  -4   7  -2 737.648 19.1032   4
   4   7   2 724.001 21.2617   3
  -4   7  -2 714.894 19.8667   6
  -5  -7  -2 1135.14 28.9015   3
  -5  -7  -2 1090.82 29.7794   4
  -5  -7  -2 1144.91 28.9431   7
   5  -7   2 1051.71 28.0372   3
   5  -7   2 1120.98 29.1491   7
  -5   7  -2 1121.99 30.9015   7
   5   7   2 1081.50 29.5506   3
  -5   7  -2 1143.84 26.6981   4
  -5   7  -2 1115.72 28.1550   6
   5   7   2 1168.49 29.9613   4
   5   7   2 1134.80 29.7297   6
  -6  -7  -2 95.4199 5.58972   7
  -6  -7  -2 96.0378 5.87289   5
  -6  -7  -2 101.740 5.80712   3
   6   7   2 103.568 6.32178   6
  -6   7  -2 85.0414 5.06495   6
   6   7   2 95.8831 6.18123   4
  -6   7  -2 98.5059 6.86159   7
  -6   7  -2 92.7151 4.28502   4
  -7  -7  -2 1.97478 1.71084   5
  -7  -7  -2 0.42245 1.21216   3
   7   7   2 1.05444 1.41034   4
   7   7   2 2.88709 1.44524   6
  -7   7  -2 2.92769 0.99354   4
  -7   7  -2 4.75519 1.40196   6
  -7   7  -2 2.35790 1.67141   7
  -8  -7  -2 61.7509 4.61859   3
  -8  -7  -2 68.8490 5.23559   5
  -8   7  -2 53.4518 4.78060   6
   8   7   2 65.1278 5.29559   4
  -8   7  -2 68.3774 6.06883   7
   8   7   2 67.0895 5.27724   6
  -8   7  -2 63.5404 2.71100   4
  -9  -7  -2 20.1264 3.04366   3
  -9  -7  -2 22.2678 3.81426   5
   9   7   2 21.1347 3.49936   4
   9   7   2 19.9440 3.59753   6
  -9   7  -2 20.9713 4.16638   7
 -10  -7  -2 0.58075 1.47514   5
 -10  -7  -2 0.00760 1.27596   3
  10   7   2 0.38504 1.62704   6
 -10   7  -2 1.34388 2.00755   7
  10   7   2 -1.5793 1.30870   4
 -11  -7  -2 5.51725 1.80684   7
 -11  -7  -2 2.47025 1.54342   3
 -11  -7  -2 4.53846 2.24014   5
  11   7   2 8.72263 2.65805   6
  11   7   2 4.42763 2.27515   4
 -11   7  -2 9.75692 3.75707   7
 -12  -7  -2 -0.8797 1.58416   5
 -12  -7  -2 2.27945 1.39477   7
 -12  -7  -2 0.93690 1.44362   3
  12   7   2 3.48304 1.90621   6
  12   7   2 1.95621 1.87627   4
 -12   7  -2 0.60851 2.04730   7
 -13  -7  -2 137.901 9.14120   5
 -13  -7  -2 133.476 6.96458   7
 -13  -7  -2 136.136 7.17654   3
  13   7   2 138.081 8.95794   4
 -13   7  -2 149.700 10.8182   7
  13   7   2 141.930 9.02265   6
 -14  -7  -2 156.777 7.86704   7
 -14  -7  -2 159.155 7.73614   3
 -14  -7  -2 156.499 10.1578   5
 -14   7  -2 147.704 11.2833   7
  14   7   2 161.907 9.69227   4
  14   7   2 170.766 10.0298   6
 -15  -7  -2 133.288 6.91847   3
 -15  -7  -2 120.985 8.30505   7
 -15  -7  -2 141.507 9.92737   5
  15   7   2 135.247 9.41172   6
  15   7   2 133.080 9.02997   4
 -15   7  -2 140.830 11.4144   7
 -16  -7  -2 75.0426 7.40866   5
 -16  -7  -2 72.1667 5.10360   3
 -16  -7  -2 76.5499 5.82670   7
  16   7   2 69.2012 7.02513   6
  16   7   2 78.6114 7.36421   4
 -16   7  -2 84.7727 9.36335   7
 -15  -8   2 1.58058 1.60331   3
 -15  -8   2 2.94896 2.97228   5
 -15  -8   2 8.19853 2.13557   7
 -15   8   2 6.06075 3.43924   7
  15   8  -2 6.24917 3.00885   4
  15   8  -2 5.49238 2.90760   6
 -14  -8   2 35.5643 3.68107   7
 -14  -8   2 45.1629 3.89134   3
 -14  -8   2 27.8609 4.95613   5
 -14   8   2 38.2002 6.02655   7
  14   8  -2 42.7182 5.74422   4
  14   8  -2 29.9888 5.37319   6
 -13  -8   2 10.0355 2.09317   7
 -13  -8   2 10.7938 3.56718   5
  13   8  -2 9.73342 3.40364   4
  13   8  -2 13.0447 3.38841   6
 -13   8   2 16.2084 3.96969   7
 -12  -8   2 -0.8162 2.56110   7
 -12  -8   2 4.10991 1.39519   7
 -12  -8   2 -3.1080 1.19016   5
 -12  -8   2 -2.9290 1.27608   3
  12   8  -2 -0.9139 1.89631   4
  12   8  -2 0.92953 1.86478   6
 -12   8   2 0.01989 2.95814   7
 -11  -8   2 187.388 7.31779   7
 -11  -8   2 188.243 8.29631   3
 -11  -8   2 167.117 9.80168   5
 -11  -8   2 184.688 8.36957   7
 -11   8   2 180.437 11.6274   7
  11   8  -2 180.779 10.1228   6
  11   8  -2 177.324 10.1455   4
 -10  -8   2 158.076 7.68665   3
 -10  -8   2 153.414 7.47152   7
 -10  -8   2 181.429 9.61681   5
  10   8  -2 175.161 9.52782   6
  10   8  -2 165.518 9.53542   4
 -10   8   2 162.691 10.6172   7
  -9  -8   2 3.34778 2.18137   5
  -9  -8   2 4.44845 1.50579   7
  -9  -8   2 3.33558 1.59931   3
   9   8  -2 3.96532 2.04776   4
   9   8  -2 1.16901 1.56684   6
  -9   8   2 1.84353 2.08090   7
  -8  -8   2 8.08268 1.98263   7
  -8  -8   2 4.08083 1.81833   3
  -8  -8   2 5.88373 2.21711   5
   8   8  -2 4.40409 2.22185   6
  -8   8   2 6.49552 1.61922   6
  -8   8   2 5.45512 2.04508   7
   8   8  -2 2.75325 1.83138   4
  -7  -8   2 177.766 8.04443   3
  -7  -8   2 170.841 8.68965   5
  -7  -8   2 154.558 7.22036   7
   7   8  -2 180.521 9.27196   4
  -7   8   2 155.548 7.12595   6
  -7   8   2 154.216 5.40938   4
   7   8  -2 172.083 9.18022   6
  -7   8   2 147.566 9.46251   7
  -6  -8   2 565.554 17.0945   7
  -6  -8   2 616.614 18.1302   3
   6  -8  -2 641.227 19.6773   3
  -6  -8   2 575.074 18.5404   5
  -6   8   2 605.132 20.7236   7
  -6   8   2 581.205 15.2415   4
   6   8  -2 587.852 19.2514   4
  -6   8   2 565.654 16.7924   6
   5  -8  -2 311.793 9.83791   4
  -5  -8   2 332.839 12.0946   3
   5  -8  -2 337.808 12.9976   3
  -5  -8   2 328.707 11.3877   7
  -5   8   2 322.853 10.0874   4
  -5   8   2 333.370 13.8747   7
   5   8  -2 306.655 12.5449   4
  -4  -8   2 79.3479 4.96961   7
  -4  -8   2 88.8584 5.75908   3
   4  -8  -2 82.9596 4.46768   4
  -4  -8   2 79.2476 5.34992   3
   4  -8  -2 93.7455 6.26947   3
   4   8  -2 91.4987 6.05084   4
  -4   8   2 84.7509 4.99023   6
  -4   8   2 91.0163 4.76262   4
  -4   8   2 91.0627 6.59694   7
  -3  -8   2 30.7753 3.28139   7
  -3  -8   2 31.2033 3.21162   3
   3  -8  -2 35.8290 3.81926   7
   3  -8  -2 38.4827 3.17503   4
   3  -8  -2 43.5388 4.28984   3
  -3  -8   2 33.2395 3.72854   3
  -3   8   2 34.0768 4.04150   7
  -3   8   2 37.8838 3.27072   4
   3   8  -2 35.1938 3.86729   4
   2  -8  -2 1.85224 1.48771   3
  -2  -8   2 -0.0221 1.19830   3
   2  -8  -2 1.27618 1.00262   4
  -2  -8   2 1.62627 1.30928   3
  -2  -8   2 0.09041 0.92746   7
  -2  -8   2 1.51585 0.98873   4
   2  -8  -2 0.87837 0.97688   7
   2   8  -2 -1.1881 1.08954   4
  -2   8   2 0.27667 1.20893   7
  -2   8   2 1.30138 1.08130   4
   1  -8  -2 58.4412 4.82920   3
  -1  -8   2 49.9640 4.56456   3
  -1  -8   2 43.2934 3.88730   4
  -1  -8   2 51.0759 4.12133   3
   1  -8  -2 52.1601 3.89526   4
  -1  -8   2 44.2344 3.79835   7
   1  -8  -2 59.3705 4.60858   7
   1   8  -2 54.8226 4.38768   4
  -1   8   2 50.0067 3.92557   4
   0  -8  -2 44.4507 3.78111   4
   0  -8   2 46.1967 3.81306   3
   0  -8   2 29.5028 3.21392   7
   0  -8  -2 42.6725 4.17986   3
   0  -8   2 41.5998 4.17925   3
   0  -8  -2 42.4696 6.66049   3
   0   8   2 40.8946 3.61974   4
   0   8  -2 44.1520 3.90111   4
   1  -8   2 234.164 10.2383   3
  -1  -8  -2 240.701 10.1095   3
  -1  -8  -2 224.650 9.70449   7
   1  -8   2 237.607 9.18230   4
   1  -8   2 215.420 9.22713   7
  -1  -8  -2 217.825 9.32094   4
  -1   8  -2 241.737 9.36964   4
  -1   8  -2 227.601 9.90362   7
   1   8   2 233.541 9.46109   4
  -2  -8  -2 284.487 11.3963   7
   2  -8   2 334.167 12.6854   3
  -2  -8  -2 314.367 12.0155   3
  -2  -8  -2 302.439 11.6644   4
   2  -8   2 313.933 11.5762   7
   2  -8   2 326.959 10.9132   4
  -2   8  -2 306.929 10.9104   4
  -2   8  -2 337.257 12.7100   7
   2   8   2 310.157 11.7022   4
   3  -8   2 65.5944 4.80305   7
  -3  -8  -2 65.3162 5.07102   3
  -3  -8  -2 56.3870 4.55961   7
   3  -8   2 68.6966 4.21867   4
   3  -8   2 59.3939 5.18443   3
  -3   8  -2 59.9833 4.31463   6
  -3   8  -2 65.8087 5.44305   7
  -3   8  -2 65.7672 4.36127   4
   3   8   2 66.9508 5.11861   4
   4  -8   2 8.98332 1.74249   4
  -4  -8  -2 13.0647 2.57054   7
   4  -8   2 7.16655 2.15204   3
  -4  -8  -2 5.82955 1.91595   3
  -4   8  -2 8.35421 2.51403   7
   4   8   2 11.7879 2.87672   4
  -4   8  -2 8.67342 1.91019   6
  -5  -8  -2 69.0689 5.15304   3
   5  -8   2 72.6679 5.80004   3
  -5  -8  -2 59.8824 4.84858   7
  -5   8  -2 79.5137 6.26284   7
  -5   8  -2 80.1057 4.40390   4
  -5   8  -2 59.8928 4.38258   6
   5   8   2 68.7606 5.39905   4
  -6  -8  -2 378.692 13.5645   5
  -6  -8  -2 360.137 12.9319   3
  -6  -8  -2 352.964 12.8985   7
   6   8   2 355.350 13.8562   4
  -6   8  -2 362.329 14.9507   7
  -6   8  -2 353.196 10.8364   4
   6   8   2 354.193 13.5890   6
  -7  -8  -2 12.5474 2.64216   3
  -7  -8  -2 14.7457 2.84660   5
   7   8   2 17.6647 3.70164   4
  -7   8  -2 16.4147 2.05861   4
   7   8   2 14.8557 3.19605   6
  -7   8  -2 12.7035 2.95331   7
  -8  -8  -2 21.3753 3.16231   3
  -8  -8  -2 25.9706 3.50350   7
  -8  -8  -2 23.4595 3.40624   5
  -8   8  -2 24.5781 1.91402   4
   8   8   2 20.1119 3.60459   4
   8   8   2 23.2406 3.72884   6
  -8   8  -2 23.2125 3.98647   7
  -9  -8  -2 0.27241 1.36770   3
  -9  -8  -2 -1.4141 1.42212   7
  -9  -8  -2 -0.4890 1.59655   5
   9   8   2 0.89161 1.76310   4
  -9   8  -2 -1.9556 1.44299   7
   9   8   2 -0.7878 1.33407   6
 -10  -8  -2 7.63038 2.64771   5
 -10  -8  -2 9.02322 2.48432   3
 -10   8  -2 7.26774 2.71892   7
  10   8   2 8.43399 2.62895   6
  10   8   2 9.97236 2.88459   4
 -11  -8  -2 0.50384 1.61214   5
 -11  -8  -2 -0.9211 0.97378   7
 -11  -8  -2 0.09808 1.30295   3
  11   8   2 1.25716 1.95458   6
  11   8   2 -0.0361 1.65456   4
 -12  -8  -2 131.741 7.10532   3
 -12  -8  -2 125.256 6.47045   7
 -12  -8  -2 111.550 8.20885   5
  12   8   2 129.624 8.66223   6
  12   8   2 117.136 8.40625   4
 -12   8  -2 131.025 10.1893   7
 -13  -8  -2 115.440 8.67332   5
 -13  -8  -2 121.588 6.59002   7
 -13  -8  -2 126.186 6.99886   3
 -13   8  -2 117.589 10.0693   7
  13   8   2 117.773 8.64085   4
  13   8   2 120.383 8.61727   6
 -14  -8  -2 73.3577 7.29455   5
 -14  -8  -2 78.7363 5.49486   7
 -14  -8  -2 78.7651 5.54755   3
  14   8   2 76.1648 7.74214   6
 -14   8  -2 59.1265 8.31550   7
  14   8   2 71.6571 6.97975   4
 -15  -8  -2 74.0380 5.56230   7
 -15  -8  -2 69.0034 7.26645   5
 -15  -8  -2 66.2394 5.20303   3
 -15   8  -2 59.2815 8.68816   7
  15   8   2 61.4786 6.81011   6
  15   8   2 67.6798 7.27184   4
 -14  -9   2 128.761 9.74178   5
 -14  -9   2 129.637 6.88752   3
 -14  -9   2 134.113 6.72777   7
  14   9  -2 137.774 9.51491   6
 -14   9   2 134.593 11.3147   7
  14   9  -2 135.524 9.55790   4
 -13  -9   2 9.89177 2.23672   7
 -13  -9   2 7.12369 2.07856   3
 -13  -9   2 5.58990 2.70756   5
 -13   9   2 10.1324 4.58096   7
  13   9  -2 0.70280 2.11101   6
  13   9  -2 2.45834 2.49396   4
 -12  -9   2 3.43379 1.71648   3
 -12  -9   2 -1.1841 1.85616   5
 -12  -9   2 7.72096 1.78696   7
  12   9  -2 5.14531 2.84502   6
 -12   9   2 0.86310 2.58698   7
  12   9  -2 1.28909 2.18852   4
 -11  -9   2 0.19630 1.38130   3
 -11  -9   2 -0.2013 3.84774   7
 -11  -9   2 3.07517 1.95119   5
 -11  -9   2 3.83142 1.44189   7
  11   9  -2 -1.1101 1.64835   6
 -11   9   2 1.17551 2.17543   7
  11   9  -2 4.01906 2.22418   4
 -10  -9   2 -2.0945 1.29339   5
 -10  -9   2 -0.5994 1.24696   3
  10   9  -2 -2.9500 1.35666   6
 -10   9   2 2.07204 2.62172   7
  10   9  -2 -0.7471 1.47537   4
  -9  -9   2 10.7700 2.99967   5
  -9  -9   2 12.8710 4.47266   3
  -9  -9   2 8.29121 2.19674   7
   9   9  -2 4.43535 2.01501   4
  -9   9   2 6.65248 2.60074   7
   9   9  -2 5.96217 2.41691   6
  -8  -9   2 23.0885 3.52605   3
  -8  -9   2 27.5989 3.28480   7
  -8  -9   2 29.9318 4.67917   5
   8   9  -2 27.7225 4.53083   4
   8   9  -2 25.4701 4.45153   6
  -8   9   2 32.6671 5.89722   7
   7  -9  -2 1.99568 1.78239   3
  -7  -9   2 3.62573 1.62431   3
  -7  -9   2 2.84588 1.88569   5
  -7  -9   2 5.94066 1.73097   7
  -7   9   2 3.13080 1.08729   4
   7   9  -2 2.41121 1.74627   4
   7   9  -2 3.03798 2.41371   6
  -6  -9   2 2.54735 1.46156   7
  -6  -9   2 -0.4012 1.34240   3
   6  -9  -2 -0.9934 1.33999   3
  -6  -9   2 0.12607 1.36534   5
   6   9  -2 1.02455 1.55592   4
  -6   9   2 -0.3546 1.21210   7
  -6   9   2 1.40548 1.12493   4
  -5  -9   2 78.5800 5.76442   3
   5  -9  -2 80.3478 4.42484   4
  -5  -9   2 79.1140 5.32821   7
   5  -9  -2 88.8684 6.73984   3
  -5   9   2 91.4484 7.16134   7
  -5   9   2 87.7472 4.90484   4
   5   9  -2 90.4955 6.53901   4
   4  -9  -2 1.24934 1.15773   4
  -4  -9   2 1.42569 1.27041   7
   4  -9  -2 -1.0055 1.47147   3
  -4  -9   2 1.53850 1.52259   3
  -4   9   2 0.51193 1.14335   6
   4   9  -2 1.22285 1.50324   4
  -4   9   2 -1.7290 1.20035   7
  -4   9   2 0.23115 0.97478   4
  -3  -9   2 4.57938 2.07899   3
   3  -9  -2 5.98770 1.66997   4
   3  -9  -2 3.96563 1.96443   3
  -3  -9   2 5.82022 1.75089   7
   3   9  -2 7.86165 2.29034   4
  -3   9   2 5.96531 1.73310   4
  -3   9   2 7.98335 2.88637   7
   2  -9  -2 5.48843 1.66741   4
   2  -9  -2 10.5860 2.68645   3
  -2  -9   2 5.69978 2.27926   3
  -2   9   2 5.98654 1.95565   4
   2   9  -2 3.87701 2.10992   4
  -1  -9   2 85.4314 5.55704   7
  -1  -9   2 86.0506 6.18892   3
   1  -9  -2 70.9590 5.81047   3
   1  -9  -2 76.8799 5.10172   4
   1   9  -2 77.5522 5.56294   4
  -1   9   2 85.8344 5.44801   4
   0  -9  -2 462.252 16.2204   3
   0  -9  -2 458.104 15.2229   4
   0  -9   2 454.873 16.3041   3
   0  -9   2 425.503 16.8970   4
   0  -9   2 450.135 15.1269   7
   0   9   2 473.636 15.4080   4
   0   9  -2 456.854 15.3162   4
  -1  -9  -2 76.9669 5.68203   7
   1  -9   2 79.4041 5.19182   4
   1  -9   2 83.5336 6.30293   3
   1  -9   2 67.9275 5.09942   7
  -1  -9  -2 93.3259 6.51370   3
   1   9   2 82.3869 5.70348   4
  -1   9  -2 84.5068 5.54455   4
  -2  -9  -2 2.96338 1.74933   3
   2  -9   2 0.77857 1.40186   3
  -2  -9  -2 -0.8248 1.23771   7
   2  -9   2 3.92156 1.58025   4
  -2   9  -2 2.25765 1.70414   7
   2   9   2 1.34028 1.64669   4
  -2   9  -2 2.58281 1.43346   4
  -3  -9  -2 3.88334 1.99894   3
   3  -9   2 8.84144 2.41057   4
   3  -9   2 8.64925 2.65202   3
  -3  -9  -2 6.11197 1.95903   7
  -3   9  -2 10.8280 3.09083   7
   3   9   2 9.25928 2.56580   4
  -3   9  -2 5.78239 1.87274   4
   4  -9   2 175.099 7.34797   4
  -4  -9  -2 166.640 8.53279   7
   4  -9   2 176.998 9.58978   3
  -4  -9  -2 186.970 9.17232   3
   4   9   2 188.441 9.36614   4
  -4   9  -2 178.336 7.76124   4
  -4   9  -2 174.353 9.78135   7
  -5  -9  -2 360.748 13.4732   3
   5  -9   2 372.711 14.6886   3
  -5  -9  -2 328.354 12.8994   7
   5   9   2 346.577 13.9271   4
  -5   9  -2 337.031 11.3964   4
  -5   9  -2 345.599 14.8441   7
  -6  -9  -2 278.961 11.6194   3
  -6  -9  -2 267.784 11.3711   7
  -6  -9  -2 286.615 12.1353   5
   6  -9   2 298.101 13.1224   3
  -6   9  -2 285.597 13.6284   7
   6   9   2 296.451 12.6605   4
   6   9   2 285.278 12.3522   6
  -7  -9  -2 55.3577 4.90886   7
  -7  -9  -2 60.8117 5.50927   3
  -7  -9  -2 57.6458 5.37181   5
   7   9   2 64.7104 5.81606   4
  -7   9  -2 66.6394 12.7585   7
  -7   9  -2 61.5481 3.69653   4
   7   9   2 57.0041 10.2627   6
  -8  -9  -2 139.652 7.81242   3
  -8  -9  -2 136.991 8.28901   5
   8   9   2 144.732 8.84644   4
  -8   9  -2 138.887 5.21741   4
   8   9   2 148.051 8.81400   6
  -8   9  -2 140.577 9.78128   7
  -9  -9  -2 78.9389 6.52693   5
  -9  -9  -2 71.3729 5.70800   3
   9   9   2 82.9143 6.65353   6
   9   9   2 75.8569 6.49342   4
  -9   9  -2 72.0305 7.26424   7
 -10  -9  -2 -0.1222 1.33247   3
 -10  -9  -2 2.11566 2.16138   5
 -10   9  -2 -0.4105 2.15961   7
  10   9   2 0.02002 1.88290   6
  10   9   2 2.22355 1.99370   4
 -11  -9  -2 55.2643 5.88757   5
 -11  -9  -2 45.4042 4.60084   3
  11   9   2 46.9185 5.55029   4
 -11   9  -2 57.0689 8.17303   7
  11   9   2 59.6174 6.09714   6
 -12  -9  -2 51.2629 4.21726   7
 -12  -9  -2 45.2979 4.52600   3
 -12  -9  -2 49.4906 5.87639   5
 -12   9  -2 65.5404 7.49587   7
  12   9   2 40.8056 5.87919   4
  12   9   2 43.0832 5.69949   6
 -13  -9  -2 15.1205 3.81137   5
 -13  -9  -2 16.1814 3.00119   3
 -13  -9  -2 18.3553 2.90508   7
 -13   9  -2 11.7188 7.20015   7
  13   9   2 15.8429 6.62602   6
  13   9   2 9.68126 3.28759   4
 -14  -9  -2 28.5238 3.75973   7
 -14  -9  -2 27.5977 3.81390   3
 -14  -9  -2 28.6644 4.95836   5
  14   9   2 31.1145 5.22226   4
 -14   9  -2 21.4677 5.64454   7
  14   9   2 32.3010 5.51766   6
 -13 -10   2 0.55781 2.29828   5
 -13 -10   2 -2.1863 1.67888   3
  13  10  -2 -1.7248 1.99692   6
 -13  10   2 0.13921 1.95501   7
  13  10  -2 0.70303 2.66424   4
 -12 -10   2 3.39932 1.99145   3
 -12 -10   2 2.78300 1.72512   7
 -12 -10   2 2.45573 2.27664   5
  12  10  -2 3.71392 2.86908   4
 -12  10   2 -0.8892 2.12822   7
  12  10  -2 1.65832 2.47295   6
 -11 -10   2 39.3807 4.36154   3
 -11 -10   2 38.6310 3.52058   7
 -11 -10   2 35.2668 5.23185   5
  11  10  -2 40.4406 5.93784   4
  11  10  -2 40.2719 5.52452   6
 -11  10   2 27.5134 4.98775   7
 -10 -10   2 2.26525 2.16565   5
  10 -10  -2 4.14636 2.31498   3
 -10 -10   2 4.36114 1.99415   3
 -10  10   2 3.20116 2.43947   7
  10  10  -2 2.93939 2.32519   6
  10  10  -2 5.21710 2.73093   4
  -9 -10   2 11.9198 3.12170   7
   9 -10  -2 8.48170 3.27852   3
  -9 -10   2 8.63274 2.47533   3
  -9 -10   2 10.6956 3.44436   5
  -9  10   2 12.3807 3.86710   7
   9  10  -2 11.4633 2.87649   6
   9  10  -2 6.03423 2.95807   4
  -8 -10   2 10.2439 2.59593   3
  -8 -10   2 10.3324 2.77422   5
  -8 -10   2 12.4992 2.85915   7
   8 -10  -2 11.1245 3.34349   3
   8  10  -2 9.68172 3.61144   6
  -8  10   2 13.2396 3.55733   7
   8  10  -2 13.3972 3.24066   4
  -7 -10   2 55.4682 4.85131   7
  -7 -10   2 66.0840 5.95004   5
  -7 -10   2 58.8593 5.25294   3
   7 -10  -2 72.6809 6.62593   3
   7  10  -2 57.0593 5.87769   6
  -7  10   2 52.2544 3.52062   4
  -7  10   2 51.5954 7.37421   7
   7  10  -2 61.2906 6.11459   4
  -6 -10   2 176.278 9.62055   5
  -6 -10   2 160.871 8.04535   7
   6 -10  -2 174.589 10.3080   3
  -6 -10   2 178.178 9.19673   3
   6  10  -2 173.791 9.92161   4
  -6  10   2 170.275 10.7533   7
  -6  10   2 171.997 7.15046   4
   5 -10  -2 220.716 8.52845   4
  -5 -10   2 212.587 9.60748   7
   5 -10  -2 224.629 11.6280   3
  -5 -10   2 226.683 10.7076   3
  -5  10   2 219.330 8.73656   4
   5  10  -2 243.587 11.6144   4
  -5  10   2 250.364 12.7161   7
  -4 -10   2 89.3513 5.90961   7
   4 -10  -2 97.8682 8.10088   3
  -4 -10   2 90.9435 8.04458   3
   4 -10  -2 89.3091 5.29343   4
  -4  10   2 93.9887 5.64504   4
  -4  10   2 89.8638 7.42756   7
   3 -10  -2 170.737 7.89149   4
  -3 -10   2 170.016 8.39371   7
  -3 -10   2 191.066 15.1450   3
   3  10  -2 184.519 9.67982   4
  -3  10   2 178.786 8.25243   4
   2 -10  -2 146.395 9.31040   3
  -2 -10   2 134.945 8.69976   3
  -2  10   2 138.479 7.37424   4
   2  10  -2 142.904 8.29375   4
  -1 -10   2 22.7250 4.00106   3
   1 -10  -2 26.4749 4.15597   3
   1  10  -2 24.5683 3.64878   4
  -1  10   2 32.4338 3.74692   4
   0 -10  -2 6.13463 2.27672   3
   0 -10   2 4.89277 2.12769   3
   0  10   2 3.12942 1.87269   4
   0  10  -2 5.71105 1.95190   4
  -1 -10  -2 48.6810 5.33552   3
   1 -10   2 49.1993 5.72476   3
  -1  10  -2 44.3014 4.39700   4
   1  10   2 45.9091 4.62668   4
   2  10   2 62.8952 5.56562   4
  -2  10  -2 59.7301 4.91443   4
   3 -10   2 130.254 8.76850   3
  -3 -10  -2 118.858 8.07338   3
   3 -10   2 100.071 7.06828   4
  -3  10  -2 118.472 8.14419   7
   3  10   2 128.074 7.89708   4
  -3  10  -2 121.805 6.70874   4
   4 -10   2 4.67858 2.22511   3
  -4 -10  -2 2.39748 1.92724   3
  -4  10  -2 5.13824 1.73830   4
  -4  10  -2 1.80542 2.11487   7
   5 -10   2 156.252 9.72495   3
  -5 -10  -2 156.734 8.75766   3
   5  10   2 149.903 9.04925   6
   5  10   2 154.043 9.07807   4
  -5  10  -2 158.770 7.30440   4
   6 -10   2 151.314 9.54632   3
  -6 -10  -2 141.455 8.60457   5
  -6 -10  -2 140.875 8.33218   3
  -6  10  -2 132.089 9.49385   7
   6  10   2 133.204 8.44480   6
  -6  10  -2 130.249 6.38397   4
   6  10   2 137.652 8.71102   4
   7 -10   2 25.9488 4.67448   3
  -7 -10  -2 15.7168 3.20549   3
  -7 -10  -2 19.2490 3.71315   5
   7  10   2 12.4654 2.98660   6
   7  10   2 28.0533 4.93235   4
  -7  10  -2 20.6051 5.08221   7
  -7  10  -2 22.2058 2.51646   4
   8 -10   2 20.9385 4.46206   3
  -8 -10  -2 24.4862 4.46694   5
  -8 -10  -2 24.3893 3.94889   3
   8  10   2 23.0490 4.31521   4
  -8  10  -2 21.2033 2.27863   4
  -8  10  -2 20.6427 4.90931   7
   8  10   2 18.6528 3.77154   6
  -9 -10  -2 2.14031 2.25842   5
   9 -10   2 4.70073 2.46315   3
  -9 -10  -2 2.76695 2.09673   3
   9  10   2 4.03774 2.28018   4
  -9  10  -2 4.37252 2.74490   7
   9  10   2 2.22550 2.21413   6
 -10 -10  -2 34.4525 4.70863   3
 -10 -10  -2 34.0176 5.50637   5
  10  10   2 35.5345 5.35559   6
 -10  10  -2 23.4628 4.67349   7
  10  10   2 26.1146 4.58110   4
 -11 -10  -2 18.9561 4.10376   5
 -11 -10  -2 17.2599 3.32965   3
  11  10   2 16.0243 4.06711   6
  11  10   2 16.0056 3.97878   4
 -11  10  -2 15.1783 4.09351   7
 -12 -10  -2 1.01973 1.91273   3
 -12 -10  -2 -3.5563 1.93548   5
 -12 -10  -2 1.75147 1.86345   7
 -12  10  -2 2.17415 3.27420   7
  12  10   2 4.33631 2.98268   6
  12  10   2 0.62134 2.07524   4
 -13 -10  -2 2.57252 1.84660   7
 -13 -10  -2 1.68905 2.74461   5
 -13 -10  -2 -0.2998 1.97777   3
  13  10   2 -3.1766 1.94994   4
  13  10   2 0.02289 2.50998   6
 -13  10  -2 0.12148 2.64955   7
 -11 -11   2 6.45166 2.64812   3
 -11 -11   2 13.7665 3.71581   5
 -11 -11   2 5.33071 2.19031   7
  11 -11  -2 8.05821 3.29949   3
 -11  11   2 8.89742 3.74827   7
  11  11  -2 10.1796 3.86136   6
  11  11  -2 7.03407 3.14526   4
 -10 -11   2 24.1726 3.94540   3
 -10 -11   2 17.1679 4.63872   5
  10 -11  -2 17.6298 4.10883   3
 -10  11   2 24.5607 8.89759   7
  10  11  -2 25.8591 5.63841   6
  10  11  -2 17.5561 4.74934   4
  -9 -11   2 -1.6141 1.84644   3
  -9 -11   2 3.33322 2.12702   5
   9 -11  -2 0.30263 2.02301   3
   9  11  -2 0.21470 2.07523   6
   9  11  -2 -0.1932 1.95314   4
  -9  11   2 3.52850 3.17157   7
   8 -11  -2 2.62805 2.51317   3
  -8 -11   2 1.04164 1.89943   3
  -8 -11   2 -3.1536 1.28422   5
   8  11  -2 4.39025 2.38846   4
   8  11  -2 -0.0017 2.08311   6
  -8  11   2 3.80497 2.59961   7
  -7 -11   2 -2.3035 1.52455   3
   7 -11  -2 -1.1695 1.73654   3
  -7 -11   2 1.01881 2.20005   5
  -7  11   2 1.30171 2.58650   7
  -7  11   2 -0.4775 1.09166   4
   7  11  -2 3.15341 2.21158   6
   7  11  -2 -0.9185 1.66293   4
   6 -11  -2 -0.5090 2.07393   3
  -6 -11   2 1.72241 2.10092   5
  -6 -11   2 -1.8548 1.69209   3
  -6  11   2 0.93887 1.36465   4
  -6  11   2 5.11926 2.71033   7
   6  11  -2 4.75021 2.17272   4
   5 -11  -2 14.9723 3.81000   3
  -5 -11   2 9.12588 2.92579   5
   5 -11  -2 5.72589 1.86872   4
  -5 -11   2 6.79615 2.66468   3
   5  11  -2 12.9229 3.80989   4
  -5  11   2 6.01282 1.88763   4
   4 -11  -2 64.1206 6.65135   3
  -4 -11   2 60.6606 5.82567   3
   4  11  -2 61.3916 5.86669   4
  -4  11   2 58.1886 4.64171   4
  -3 -11   2 2.96426 2.19313   3
   3 -11  -2 4.08642 2.54067   3
  -3  11   2 8.22188 2.46853   4
   3  11  -2 7.63982 2.68684   4
   2 -11  -2 22.6580 4.62013   3
  -2 -11   2 14.3861 3.45215   3
  -2  11   2 17.5361 3.29800   4
   2  11  -2 18.5265 3.51745   4
  -1 -11   2 -1.0320 1.36277   3
   1 -11  -2 0.58282 1.62866   3
   1  11  -2 1.81034 3.14531   4
  -1  11   2 -0.9819 1.21023   4
   0 -11  -2 81.8380 7.02746   3
   0 -11   2 90.8041 7.24546   3
   0  11   2 77.7187 6.07971   4
   0  11  -2 93.9267 6.65970   4
  -1 -11  -2 17.1741 3.73497   3
   1 -11   2 17.8977 3.82509   3
  -1  11  -2 14.4790 2.91479   4
   2 -11   2 131.350 8.88182   3
  -2 -11  -2 114.233 8.12504   3
  -2  11  -2 124.610 7.35320   4
   2  11   2 125.599 7.96456   4
  -3 -11  -2 14.3675 3.35541   3
   3 -11   2 10.1345 3.25188   3
   3  11   2 18.6722 3.39039   4
  -3  11  -2 12.7666 2.73870   4
   4 -11   2 112.310 8.27759   3
  -4 -11  -2 84.1832 6.76345   3
  -4  11  -2 82.7509 5.76379   4
   4  11   2 74.1838 6.55018   4
  -4  11  -2 79.6769 7.15217   7
   5 -11   2 37.3216 5.54354   3
  -5 -11  -2 42.2893 5.40954   3
  -5  11  -2 51.2057 6.08138   7
   5  11   2 47.9574 5.45402   6
   5  11   2 48.4013 5.46960   4
  -5  11  -2 35.9488 3.88732   4
  -6 -11  -2 1.78038 2.12099   5
   6 -11   2 -0.8738 1.77040   3
  -6 -11  -2 1.35613 1.82825   3
  -6  11  -2 -1.5335 1.09404   4
   6  11   2 -1.0992 1.68670   4
   6  11   2 -0.7449 2.01757   6
  -6  11  -2 -2.4351 1.91409   7
  -7 -11  -2 3.35438 1.99083   3
  -7 -11  -2 3.24824 2.27186   5
   7 -11   2 0.02487 1.96681   3
   7  11   2 3.44709 2.11958   6
  -7  11  -2 1.57908 1.29226   4
   7  11   2 -0.4805 2.04012   4
  -7  11  -2 0.60655 1.96390   7
  -8 -11  -2 4.75540 2.69208   5
  -8 -11  -2 3.18314 2.24592   3
   8 -11   2 4.78533 3.05723   3
   8  11   2 3.04942 2.44946   6
   8  11   2 8.75495 3.32011   4
  -8  11  -2 5.94183 1.65486   4
  -8  11  -2 7.21789 3.15174   7
  -9 -11  -2 2.73577 2.60726   5
  -9 -11  -2 5.17730 2.67767   3
   9 -11   2 11.6590 3.45106   3
   9  11   2 4.98447 2.64801   4
  -9  11  -2 4.73386 2.64599   7
   9  11   2 8.57541 3.04521   6
 -10 -11  -2 37.1967 5.01217   3
 -10 -11  -2 31.8181 5.91913   5
  10  11   2 30.8709 5.39817   4
  10  11   2 32.6921 6.64395   6
 -10  11  -2 26.4659 7.57949   7
 -11 -11  -2 1.79004 2.41121   3
  11 -11   2 0.95424 2.90525   3
 -11 -11  -2 0.59695 2.52951   5
  11  11   2 -0.7474 2.04578   6
  11  11   2 5.01637 2.78490   4
 -11  11  -2 -2.3920 2.16118   7
  -9 -12   2 17.1258 4.76215   3
  -9 -12   2 7.69002 2.93481   5
   9 -12  -2 22.2784 5.07859   3
  -9  12   2 21.3708 5.63692   7
   9  12  -2 14.5583 4.07067   4
   9  12  -2 10.6747 3.69454   6
  -8 -12   2 21.3564 4.53394   5
  -8 -12   2 22.0619 4.04433   3
   8 -12  -2 12.4988 5.26159   3
  -8  12   2 17.8929 5.18113   7
   8  12  -2 23.2760 4.80663   4
   8  12  -2 16.0300 3.87358   6
  -7 -12   2 4.18904 2.70190   3
   7 -12  -2 2.39950 2.43734   3
  -7  12   2 0.58739 1.54144   4
   7  12  -2 0.85583 1.96718   6
   7  12  -2 5.25139 2.59275   4
   6 -12  -2 18.6723 4.80157   3
  -6 -12   2 15.7429 3.72493   3
  -6 -12   2 10.1925 3.13373   5
  -6  12   2 14.5489 2.80112   4
   6  12  -2 18.1123 4.74652   6
   6  12  -2 9.76928 3.48966   4
  -5 -12   2 5.78898 2.77405   3
   5 -12  -2 5.08620 2.90772   3
  -5 -12   2 9.54182 3.24469   5
   5  12  -2 7.89299 3.24819   4
  -5  12   2 6.94376 2.21301   4
   4 -12  -2 7.87797 3.51114   3
  -4 -12   2 9.05007 3.26954   3
   4  12  -2 11.9490 3.40036   4
  -4  12   2 5.30673 2.20827   4
   3 -12  -2 9.90868 3.72636   3
  -3 -12   2 10.3509 3.52144   3
  -3  12   2 18.0609 3.18463   4
   3  12  -2 14.9423 3.71826   4
  -2 -12   2 -0.1278 2.06192   3
   2 -12  -2 -1.0381 2.19025   3
  -2  12   2 2.30886 2.32832   4
   2  12  -2 -2.5613 1.89347   4
   1 -12  -2 13.5583 3.67467   3
  -1 -12   2 9.02692 3.21644   3
   1  12  -2 9.37222 2.87419   4
  -1  12   2 13.9130 3.23752   4
   0 -12  -2 2.29084 2.45392   3
   0 -12   2 -0.0960 2.09064   3
   0  12   2 3.75829 2.00613   4
   0  12  -2 1.52892 1.69806   4
  -1 -12  -2 39.3383 5.61352   3
   1 -12   2 34.9275 5.50516   3
  -1  12  -2 31.1433 4.44086   4
   1  12   2 26.6100 4.39860   4
  -2 -12  -2 45.7471 6.26605   3
   2 -12   2 44.8690 6.28020   3
   2  12   2 48.5374 5.44223   4
  -2  12  -2 56.3493 5.19671   4
  -3 -12  -2 4.07202 2.53800   3
   3 -12   2 -0.4149 2.06846   3
  -3  12  -2 5.07254 2.40032   4
   3  12   2 5.43495 2.29939   4
  -4 -12  -2 -0.6588 1.84923   3
   4 -12   2 -1.4866 1.52722   3
   4  12   2 1.11527 2.38585   4
  -4  12  -2 0.03836 1.65402   4
  -5 -12  -2 4.82288 2.52533   5
   5 -12   2 9.17126 3.13430   3
  -5 -12  -2 5.25502 2.51365   3
  -5  12  -2 3.27999 1.64332   4
   5  12   2 5.99543 2.61673   4
   5  12   2 1.96334 2.45163   6
  -6 -12  -2 5.87478 2.91350   5
  -6 -12  -2 5.25868 2.54690   3
   6 -12   2 3.69910 2.59492   3
  -6  12  -2 8.42838 2.29528   4
  -6  12  -2 0.42203 2.24083   7
   6  12   2 7.14345 3.13277   6
   6  12   2 5.62923 2.42993   4
  -7 -12  -2 38.7640 5.31743   3
   7  12   2 29.7713 4.92738   6
   7  12   2 52.6619 10.2428   4
  -7  12  -2 31.5911 3.77353   4
  -7  12  -2 28.8009 6.08173   7
   8 -12   2 11.5802 4.10555   3
  -8 -12  -2 22.1167 4.66955   5
  -8  12  -2 24.4791 6.45598   7
   8  12   2 23.8528 4.95927   4
   8  12   2 21.1326 4.30193   6
   9 -12   2 17.3397 4.71724   3
  -9 -12  -2 19.1980 3.86091   3
  -9 -12  -2 12.9884 3.69110   5
   9  12   2 12.6695 3.72965   6
  -9  12  -2 19.2073 4.93855   7
   9  12   2 13.7460 4.02876   4
   6 -13  -2 8.39064 3.39076   3
  -6 -13   2 9.36216 3.57867   5
  -6 -13   2 11.7516 3.51010   3
  -6  13   2 18.8836 3.36526   4
   6  13  -2 12.3015 3.44405   6
   6  13  -2 7.95864 3.72784   4
  -5 -13   2 9.31383 3.13726   5
  -5 -13   2 4.81062 2.81590   3
   5 -13  -2 15.1333 4.14116   3
  -5  13   2 6.60837 3.07984   4
   5  13  -2 11.6254 3.64955   4
   4 -13  -2 3.49466 2.71625   3
  -4 -13   2 2.69193 2.58873   3
   4  13  -2 4.06354 3.02619   4
  -4  13   2 3.33586 1.92990   4
  -3 -13   2 6.54303 4.63365   3
   3 -13  -2 1.32365 2.54497   3
   3  13  -2 4.67599 2.61373   4
  -3  13   2 4.47685 2.25209   4
   2 -13  -2 11.7739 4.78658   3
   2  13  -2 23.8222 4.47909   4
  -2  13   2 30.4194 4.47982   4
   1 -13  -2 52.2735 10.4735   3
  -1 -13   2 76.6207 12.4993   3
   1  13  -2 61.0798 6.44612   4
  -1  13   2 57.2057 5.78000   4
   0 -13   2 220.495 19.1535   3
   0  13  -2 182.908 10.5793   4
   0  13   2 189.674 10.5525   4
  -1  13  -2 46.6931 5.46247   4
   1  13   2 49.1576 5.70034   4
   2 -13   2 9.14996 3.60334   3
  -2 -13  -2 13.4166 4.70201   3
   2  13   2 6.31439 2.90801   4
  -2  13  -2 9.02627 2.86980   4
  -3 -13  -2 5.30825 2.94668   3
   3 -13   2 7.25000 3.45646   3
  -3  13  -2 5.46038 2.24186   4
   3  13   2 0.97188 1.88885   4
   4 -13   2 1.61112 2.80292   3
  -4 -13  -2 3.60454 2.58878   3
  -4  13  -2 1.74009 1.95944   4
   4  13   2 3.94014 3.88787   4
   4  13   2 3.23355 2.26640   6
  -5 -13  -2 4.53376 2.88672   3
   5 -13   2 1.59919 2.77864   3
  -5 -13  -2 0.94489 2.14960   5
   5  13   2 3.45068 2.49045   6
  -5  13  -2 1.62493 1.95767   4
   5  13   2 2.46801 2.59741   4
  -6 -13  -2 0.59945 2.44632   5
   6 -13   2 7.30257 3.57424   3
  -6 -13  -2 3.85938 2.86448   3
   6  13   2 7.57912 3.04286   6
   6  13   2 3.84019 3.19064   4
  -6  13  -2 3.70605 2.61893   4
 -19   0   3 -0.7307 2.62061   7
  19   0  -3 2.56444 1.82516   6
  18   0  -3 -0.3700 1.67914   6
 -18   0   3 0.87858 2.49479   5
 -18   0   3 -5.7342 1.82204   7
 -17   0   3 1.74219 1.89721   7
  17   0  -3 0.38753 1.68914   6
 -17   0   3 1.00522 2.02625   5
 -16   0   3 3.16846 1.44574   4
 -16   0   3 -1.6455 1.57905   5
 -16   0   3 0.72647 1.53667   7
  16   0  -3 0.79910 1.63206   6
 -15   0   3 1.47905 1.78292   5
  15   0  -3 1.38358 1.33508   6
 -15   0   3 -2.4383 1.11778   7
 -15   0   3 -0.3580 0.82677   4
 -14   0   3 1.70835 1.42026   5
 -14   0   3 0.36484 1.16474   7
  14   0  -3 0.36935 1.40587   6
 -14   0   3 0.54416 0.84631   4
  13   0  -3 -0.3919 1.22805   6
 -13   0   3 -0.3036 1.21475   5
 -13   0   3 0.55437 1.06444   4
 -13   0   3 0.59703 1.19678   7
 -13   0   3 1.06935 0.67378   3
 -12   0   3 1.66925 0.78017   3
 -12   0   3 0.50706 1.25748   5
 -12   0   3 -0.4680 0.73367   4
 -12   0   3 1.06140 1.24488   7
  12   0  -3 0.74580 1.15725   6
  12   0  -3 0.06774 0.82568   3
 -12   0   3 -0.6575 0.94432   6
  12   0  -3 -0.7765 0.67601   4
 -11   0   3 1.62636 1.26258   7
 -11   0   3 0.89019 0.65581   3
  11   0  -3 -0.3734 0.72093   7
  11   0  -3 -0.1820 0.78833   5
 -11   0   3 -0.2231 0.98701   5
 -11   0   3 0.60782 1.06145   6
  11   0  -3 1.80680 0.83238   3
 -11   0   3 0.99918 0.80726   4
  11   0  -3 0.88505 0.77785   4
  11   0  -3 0.89219 1.11461   6
  10   0  -3 -0.7681 0.73090   5
 -10   0   3 0.08394 0.83807   6
 -10   0   3 -0.1106 0.57064   3
 -10   0   3 -0.4641 1.04985   5
  10   0  -3 0.29127 0.70049   4
  10   0  -3 -0.2492 0.83296   6
 -10   0   3 -1.3485 0.52549   4
  10   0  -3 1.80899 0.94264   7
 -10   0   3 0.97417 1.11062   7
  10   0  -3 1.77405 0.86260   3
  -9   0   3 0.02255 0.76416   7
  -9   0   3 0.61287 0.52954   3
  -9   0   3 -0.1471 0.92197   5
   9   0  -3 2.78871 0.90382   7
   9   0  -3 -0.5726 0.63559   6
   9   0  -3 0.10146 0.71974   5
  -9   0   3 -0.8852 0.44413   6
   9   0  -3 0.50032 0.62597   3
  -9   0   3 0.98656 0.65805   4
   9   0  -3 1.12547 0.71319   4
   8   0  -3 0.56214 0.55650   3
   8   0  -3 -0.2825 0.54714   5
  -8   0   3 0.67999 1.02550   5
   8   0  -3 -0.0277 0.56730   7
  -8   0   3 -0.2494 0.60968   6
  -8   0   3 0.39574 0.46251   3
  -8   0   3 1.22609 0.79886   7
   8   0  -3 1.18554 0.66403   4
   8   0  -3 0.03666 0.58945   6
  -8   0   3 0.25711 0.46064   4
  -7   0   3 0.25265 0.38631   3
   7   0  -3 0.02071 0.41557   4
   7   0  -3 -0.2444 0.42563   3
  -7   0   3 0.37260 0.67247   5
   7   0  -3 1.18817 0.60191   7
   7   0  -3 -0.4271 0.54212   5
   7   0  -3 0.09981 0.59925   6
  -7   0   3 0.73569 0.67767   7
  -7   0   3 -0.2683 0.36570   4
  -7   0   3 0.37694 0.61651   6
  -6   0   3 0.29602 0.59389   5
   6   0  -3 0.22910 0.45008   7
  -6   0   3 -0.2570 0.31870   4
   6   0  -3 0.69217 0.51328   3
  -6   0   3 0.26562 0.35184   3
  -6   0   3 0.52963 0.65211   7
   6   0  -3 0.13015 0.46326   6
   6   0  -3 0.38523 0.63059   5
   6   0  -3 0.47944 0.46289   4
  -6   0   3 -0.1536 0.51406   6
  -5   0   3 -0.3259 0.57453   5
   5   0  -3 0.11747 0.36549   4
   5   0  -3 -0.1007 0.46685   5
  -5   0   3 0.44538 0.52750   7
  -5   0   3 0.06060 0.49894   6
  -5   0   3 0.70766 0.41661   4
   5   0  -3 0.04827 0.45379   6
   5   0  -3 0.52102 0.38682   7
   5   0  -3 0.38403 0.36307   3
  -5   0   3 0.52233 0.31024   3
  -4   0   3 0.60530 0.23904   3
   4   0  -3 0.15476 0.34895   5
   4   0  -3 1.09936 0.51535   6
  -4   0   3 0.27580 0.41146   7
  -4   0   3 0.84372 0.57010   5
  -4   0   3 0.14891 0.32013   6
   4   0  -3 0.29032 0.26892   3
  -4   0   3 0.08785 0.29634   4
   4   0  -3 -0.0784 0.28516   4
   4   0  -3 0.59662 0.33545   7
  -3   0   3 -0.2528 0.23664   7
  -3   0   3 0.11706 0.36502   5
   3   0  -3 0.68558 0.37256   6
   3   0  -3 -0.2607 0.27254   5
  -3   0   3 0.21957 0.26774   4
  -3   0   3 0.47225 0.31745   6
   3   0  -3 0.39101 0.19591   3
   3   0  -3 0.46185 0.28591   7
   3   0  -3 0.25094 0.29051   4
  -2   0   3 -0.0262 0.28275   5
   2   0  -3 0.22012 0.22023   7
   2   0  -3 0.31325 0.23892   6
   2   0  -3 0.69377 0.34806   5
   2   0  -3 0.02937 0.21767   4
  -2   0   3 0.59833 0.31254   7
  -2   0   3 0.61047 0.29419   4
  -1   0   3 0.04857 0.18324   5
   1   0  -3 0.31399 0.14646   5
   0   0   3 0.36944 0.15337   6
   0   0  -3 0.21267 0.13180   3
   1   0   3 0.35395 0.13983   5
  -1   0  -3 0.01417 0.14664   5
  -1   0  -3 0.71052 0.24675   3
   1   0   3 0.60948 0.25960   6
   2   0   3 0.13843 0.25425   5
  -2   0  -3 -0.0628 0.27067   5
   2   0   3 0.50377 0.36453   6
   2   0   3 0.38394 0.32092   3
  -2   0  -3 0.54355 0.33432   6
  -2   0  -3 0.17759 0.32622   7
  -2   0  -3 0.07699 0.27047   3
  -3   0  -3 0.54970 0.41653   5
   3   0   3 0.39779 0.35065   3
  -3   0  -3 0.20354 0.28747   6
   3   0   3 0.79484 0.50563   6
  -3   0  -3 0.18572 0.34956   4
  -3   0  -3 0.06202 0.28336   7
  -3   0  -3 0.03332 0.31622   3
   3   0   3 -0.0922 0.26820   5
  -4   0  -3 0.21265 0.34459   4
  -4   0  -3 0.68935 0.43891   6
   4   0   3 0.02485 0.34390   6
   4   0   3 -0.1103 0.29098   3
  -4   0  -3 0.09058 0.39724   7
  -4   0  -3 0.05580 0.38206   3
  -4   0  -3 0.77067 0.55294   5
  -5   0  -3 0.42822 0.55969   5
   5   0   3 0.63698 0.53318   6
   5   0   3 0.23828 0.45546   5
  -5   0  -3 0.34648 0.47101   3
  -5   0  -3 -0.1593 0.41223   6
   5   0   3 0.03652 0.38720   3
  -5   0  -3 0.60680 0.60228   7
  -5   0  -3 -0.0373 0.31737   4
  -6   0  -3 1.27677 0.66817   3
  -6   0  -3 0.30631 0.60332   7
  -6   0  -3 -0.1175 0.50208   5
   6   0   3 0.32461 0.47534   6
   6   0   3 0.04443 0.44717   5
  -6   0  -3 -0.5303 0.33958   4
  -6   0  -3 0.37335 0.53348   6
   6   0   3 -0.2346 0.43928   3
   7   0   3 -0.5816 0.37128   3
  -7   0  -3 0.46508 0.67787   3
   7   0   3 0.22282 0.59948   6
  -7   0  -3 -0.7094 0.46203   5
  -7   0  -3 0.41927 0.59187   4
  -7   0  -3 0.29751 0.65831   7
   7   0   3 0.33260 0.56393   5
  -7   0  -3 0.57022 0.66544   6
  -8   0  -3 0.32474 0.74032   5
   8   0   3 -0.8038 0.61361   5
  -8   0  -3 1.18095 0.73995   4
  -8   0  -3 0.60284 0.85685   7
   8   0   3 -0.5670 0.74723   6
   8   0   3 0.48491 0.65704   3
  -8   0  -3 0.64510 0.71801   3
  -8   0  -3 3.35732 1.17840   6
   9   0   3 0.43642 0.89299   6
  -9   0  -3 1.23109 0.97990   5
  -9   0  -3 0.10856 0.77713   6
   9   0   3 0.01036 0.62768   5
  -9   0  -3 -0.0520 0.76549   7
  -9   0  -3 1.60074 0.93619   3
   9   0   3 -0.2504 0.58703   3
 -10   0  -3 0.59221 0.93181   3
 -10   0  -3 0.27621 1.22850   5
  10   0   3 1.56227 1.10606   5
  10   0   3 0.85250 0.84694   3
  10   0   3 1.31599 1.11349   6
 -10   0  -3 -1.4317 0.88672   7
 -10   0  -3 0.11754 0.65795   4
 -11   0  -3 0.54579 0.69850   4
  11   0   3 1.10226 1.13161   5
 -11   0  -3 -0.8391 1.11486   5
  11   0   3 -0.4699 0.81182   3
 -11   0  -3 -0.2814 1.01674   7
 -11   0  -3 0.90624 1.10836   6
 -11   0  -3 0.64541 0.94946   3
  11   0   3 -1.6104 0.95048   6
 -12   0  -3 -0.2317 0.93109   3
 -12   0  -3 0.42516 1.05354   7
 -12   0  -3 -0.1070 1.08550   5
  12   0   3 -1.0178 1.01628   6
 -12   0  -3 -0.9904 0.73638   4
  13   0   3 -1.5339 0.96155   6
 -13   0  -3 1.45535 0.97968   4
 -13   0  -3 1.26184 1.31542   7
 -13   0  -3 0.61099 1.32372   5
 -14   0  -3 0.28345 1.43080   7
 -14   0  -3 0.70839 1.10853   3
 -14   0  -3 0.54615 1.06418   4
 -14   0  -3 0.79112 1.98998   5
  14   0   3 -0.2514 1.14056   6
  15   0   3 -0.9818 1.42361   6
 -15   0  -3 -0.0607 1.40501   5
 -15   0  -3 -1.1415 1.16511   4
 -15   0  -3 -0.7761 1.16683   7
 -15   0  -3 -0.8144 1.19972   3
 -16   0  -3 3.12157 1.42183   3
  16   0   3 1.30667 1.63139   6
 -16   0  -3 -0.1518 1.80464   7
 -16   0  -3 1.30249 1.96205   5
 -16   0  -3 -2.4496 1.59447   4
  17   0   3 -0.1669 1.92076   6
 -17   0  -3 0.83231 1.91775   5
 -17   0  -3 -0.0283 1.27879   7
 -17   0  -3 1.57030 1.32424   3
 -18   0  -3 3.96099 2.39594   7
  18   0   3 3.47059 1.79470   6
 -18   0  -3 -1.4011 1.51661   3
 -19   0  -3 0.58374 3.43169   7
  19   0   3 3.12546 2.26356   6
 -19  -1   3 2.42104 2.42446   7
 -19  -1   3 7.79276 3.28876   5
  19  -1  -3 5.25939 2.44519   6
  19   1  -3 13.8870 5.69841   6
 -19   1   3 7.93835 3.15903   7
 -18  -1   3 3.48015 2.99199   5
  18  -1  -3 3.75047 1.97765   6
 -18  -1   3 2.46690 2.35618   7
  18   1  -3 6.97088 2.34703   6
 -18   1   3 4.57159 3.26115   7
 -17  -1   3 82.1261 6.80152   7
  17  -1  -3 69.9590 5.86853   6
 -17   1   3 68.7060 6.75448   7
  17   1  -3 78.2832 6.17246   6
  16  -1  -3 6.90401 2.37449   6
 -16  -1   3 18.2787 3.65078   4
 -16  -1   3 17.8210 4.78933   5
 -16  -1   3 15.1503 3.18710   7
 -16   1   3 18.1009 3.88030   7
  16   1  -3 7.45273 2.31509   6
 -15  -1   3 9.03135 2.95563   5
 -15  -1   3 12.3135 2.96940   7
 -15  -1   3 6.16195 1.80473   4
  15  -1  -3 8.66445 2.18455   6
 -15   1   3 17.3425 3.98371   7
  15   1  -3 8.59032 2.45801   6
 -15   1   3 4.88278 2.51913   5
 -14  -1   3 45.1479 3.73575   4
 -14  -1   3 48.8184 4.56407   7
  14  -1  -3 51.1055 4.40917   6
 -14  -1   3 51.7491 5.49374   5
 -14   1   3 47.6732 5.49110   5
  14   1  -3 54.1259 3.71807   4
  14   1  -3 48.5687 4.52234   6
 -14   1   3 45.9487 2.64882   4
 -14   1   3 43.3589 4.81621   7
 -13  -1   3 192.991 8.99225   7
  13  -1  -3 203.491 8.76008   6
 -13  -1   3 195.198 10.4904   5
 -13  -1   3 194.675 6.11723   3
 -13  -1   3 189.415 7.78798   4
 -13   1   3 197.769 6.30919   4
  13   1  -3 214.745 9.08759   6
 -13   1   3 199.446 10.6853   5
  13   1  -3 200.453 7.66214   4
 -13   1   3 190.462 9.62988   7
 -12  -1   3 258.025 7.52569   3
  12  -1  -3 255.872 9.81111   6
  12  -1  -3 248.264 8.82012   3
 -12  -1   3 265.880 11.9229   5
 -12  -1   3 259.380 10.1258   7
 -12  -1   3 259.584 9.18521   4
  12  -1  -3 254.270 9.34907   7
  12   1  -3 262.836 8.88394   4
 -12   1   3 255.813 7.55408   4
  12   1  -3 240.972 9.16168   3
  12   1  -3 277.287 10.2713   6
 -12   1   3 257.952 7.12446   3
 -12   1   3 251.830 11.8883   5
 -12   1   3 264.782 10.2482   6
 -12   1   3 260.129 10.9639   7
 -11  -1   3 398.569 12.2124   4
 -11  -1   3 403.588 14.9566   5
  11  -1  -3 394.057 12.4283   7
 -11  -1   3 425.285 13.2554   7
  11  -1  -3 406.477 11.9342   3
 -11  -1   3 404.786 10.6304   3
  11  -1  -3 406.929 14.0297   5
  11  -1  -3 403.805 12.8742   6
  11   1  -3 421.090 12.0057   4
 -11   1   3 412.170 10.3866   3
 -11   1   3 395.279 13.0428   6
 -11   1   3 386.464 15.0429   5
  11   1  -3 415.355 13.1494   6
  11   1  -3 425.784 13.8672   5
 -11   1   3 421.220 14.1325   7
  11   1  -3 399.246 12.2834   3
 -11   1   3 406.050 10.6187   4
  10  -1  -3 162.101 6.73795   6
 -10  -1   3 166.228 5.30194   3
 -10  -1   3 165.074 6.92758   7
 -10  -1   3 166.376 8.27934   5
  10  -1  -3 163.045 6.48769   7
  10  -1  -3 152.361 5.90841   3
 -10  -1   3 157.897 7.30177   6
  10  -1  -3 130.409 9.97248   5
 -10  -1   3 153.234 6.28527   4
  10   1  -3 167.763 6.25300   4
 -10   1   3 155.453 5.09879   4
 -10   1   3 156.981 6.83274   6
 -10   1   3 165.254 5.10953   3
  10   1  -3 164.611 6.95309   6
  10   1  -3 160.000 6.32984   3
 -10   1   3 150.230 8.17360   5
 -10   1   3 155.270 7.39910   7
  -9  -1   3 107.489 6.15849   5
  -9  -1   3 99.2464 5.30237   6
  -9  -1   3 100.126 4.62946   4
   9  -1  -3 104.061 3.54493   4
   9  -1  -3 95.7796 4.19442   3
  -9  -1   3 101.317 3.75390   3
   9  -1  -3 95.8479 4.62288   7
  -9  -1   3 98.6710 4.79923   7
   9  -1  -3 100.185 5.53743   5
   9  -1  -3 99.1185 4.84529   6
   9   1  -3 99.2174 5.29562   5
   9   1  -3 96.9555 4.97888   6
  -9   1   3 99.2598 6.18250   5
  -9   1   3 98.1029 3.58346   4
  -9   1   3 104.434 5.01178   6
   9   1  -3 93.4116 4.40338   3
  -9   1   3 102.165 3.63525   3
  -9   1   3 92.8105 5.42261   7
   9   1  -3 100.480 4.51309   4
   8  -1  -3 67.1621 3.59104   7
  -8  -1   3 66.7731 3.55115   4
  -8  -1   3 64.9339 3.55376   7
   8  -1  -3 69.2621 3.17728   3
   8  -1  -3 66.8918 2.57863   4
  -8  -1   3 65.1829 3.98245   6
  -8  -1   3 64.9275 2.79968   3
   8  -1  -3 69.6579 3.70912   6
   8   1  -3 64.3031 3.35171   4
  -8   1   3 69.3105 2.67625   4
   8   1  -3 67.8617 4.11960   5
  -8   1   3 66.9673 4.16100   7
   8   1  -3 67.8222 3.82828   6
   8   1  -3 66.7681 3.35455   3
  -8   1   3 69.6983 2.75948   3
  -8   1   3 67.6108 3.71689   6
  -7  -1   3 41.1951 2.55574   7
   7  -1  -3 39.0646 1.74679   4
  -7  -1   3 39.7291 2.87218   6
   7  -1  -3 44.2131 2.71186   7
   7  -1  -3 41.9574 3.17700   5
  -7  -1   3 41.9600 2.03495   3
   7  -1  -3 41.3961 2.20263   3
   7  -1  -3 40.8041 2.60913   6
  -7  -1   3 40.2417 2.54654   4
   7   1  -3 41.6454 2.54751   4
  -7   1   3 42.5303 1.87005   4
   7   1  -3 44.0727 2.85738   6
  -7   1   3 36.9368 3.26822   5
  -7   1   3 40.4324 1.92885   3
   7   1  -3 38.4354 2.96421   5
   7   1  -3 40.7838 2.41745   3
  -7   1   3 42.4036 3.07517   7
  -7   1   3 38.5876 2.97079   6
  -6  -1   3 45.9337 2.04366   3
   6  -1  -3 45.9112 2.16329   3
   6  -1  -3 45.9930 2.56918   6
  -6  -1   3 45.1256 3.19120   5
   6  -1  -3 47.4193 1.75906   4
  -6  -1   3 44.5181 2.57041   4
   6  -1  -3 47.1240 3.20652   5
   6  -1  -3 52.0840 2.79061   7
  -6  -1   3 43.5688 2.41714   7
  -6   1   3 54.3376 3.16471   7
  -6   1   3 43.9574 2.51280   6
   6   1  -3 48.0251 2.39773   3
   6   1  -3 47.6549 2.78774   6
  -6   1   3 48.0146 1.83012   4
  -6   1   3 47.3473 1.95548   3
   6   1  -3 42.6534 2.50405   4
   5  -1  -3 655.514 16.7298   5
   5  -1  -3 649.271 15.3252   6
  -5  -1   3 649.303 15.6462   4
   5  -1  -3 641.022 14.0140   4
  -5  -1   3 648.271 14.5240   3
   5  -1  -3 666.962 14.7232   3
  -5  -1   3 621.255 14.9913   7
   5  -1  -3 651.073 15.7507   7
  -5   1   3 650.902 15.3519   6
   5   1  -3 654.421 15.8325   6
   5   1  -3 682.908 16.3745   5
  -5   1   3 616.572 16.8986   5
  -5   1   3 641.516 16.2077   7
   5   1  -3 650.792 15.0224   3
  -5   1   3 644.010 14.2967   3
  -5   1   3 649.167 14.0767   4
   5   1  -3 648.711 15.5597   4
   4  -1  -3 1742.73 37.5261   6
  -4  -1   3 1778.40 38.7957   5
   4  -1  -3 1747.07 38.1919   7
  -4  -1   3 1774.54 37.2291   7
  -4  -1   3 1700.08 38.0062   4
  -4  -1   3 1767.60 36.9551   3
   4  -1  -3 1724.18 38.9777   5
   4  -1  -3 1768.01 36.4538   4
   4  -1  -3 1711.28 37.0310   3
  -4   1   3 1744.21 36.6748   3
   4   1  -3 1713.69 38.1210   6
   4   1  -3 1794.30 38.1108   4
  -4   1   3 1855.86 38.6996   7
  -4   1   3 1697.48 39.1880   5
   4   1  -3 1750.63 38.4725   5
   4   1  -3 1779.17 37.3550   3
  -4   1   3 1785.20 37.5719   6
   3  -1  -3 2480.58 50.4499   3
   3  -1  -3 2436.28 50.0151   4
  -3  -1   3 2500.67 51.4921   4
  -3  -1   3 2432.47 50.5213   3
   3  -1  -3 2458.64 52.1672   5
   3  -1  -3 2436.17 51.5737   7
  -3   1   3 2311.37 52.1075   5
   3   1  -3 2444.72 51.4353   4
  -3   1   3 2296.90 51.6731   7
  -2  -1   3 369.382 8.38199   3
  -2  -1   3 361.174 8.08730   7
   2  -1  -3 365.991 9.40903   5
  -2  -1   3 363.076 9.04487   5
   2  -1  -3 387.989 8.28025   6
  -2  -1   3 374.083 9.13156   4
  -2  -1   3 378.075 8.34148   3
   2  -1  -3 376.348 9.26219   7
   2   1  -3 375.817 9.15700   4
  -2   1   3 369.825 9.31479   7
   2   1  -3 384.697 9.07314   5
   2   1  -3 375.096 8.56059   3
  -2   1   3 376.796 8.27274   6
   2   1  -3 372.550 8.51151   3
   1  -1  -3 257.426 6.68376   7
  -1  -1   3 261.822 6.01639   3
  -1  -1   3 237.399 6.44329   4
  -1  -1   3 250.419 6.25692   5
   1  -1  -3 269.486 6.08901   4
  -1  -1   3 273.300 6.14489   3
   1   1  -3 272.200 6.62816   4
  -1   1   3 252.852 6.67750   7
   1   1  -3 266.378 6.12897   3
   1   1  -3 254.572 6.16749   3
   0  -1   3 1409.53 28.5032   7
   0  -1   3 1377.31 28.6847   3
   0  -1  -3 1161.55 28.7459   4
   0   1   3 1400.25 28.4975   6
   0   1   3 1385.20 28.9284   4
   0   1  -3 1403.25 28.5568   7
   0   1   3 1385.45 28.7639   3
   1  -1   3 305.797 7.30307   3
   1  -1   3 310.788 7.35092   7
   1  -1   3 313.057 7.59457   6
  -1  -1  -3 310.721 7.59733   4
  -1  -1  -3 310.136 7.38341   6
  -1   1  -3 303.151 7.47469   6
  -1   1  -3 305.347 7.36703   3
   1   1   3 309.793 7.34855   6
   1   1   3 310.680 7.48572   3
  -1   1  -3 303.059 7.41106   7
   2  -1   3 8.28087 0.83910   7
  -2  -1  -3 6.94830 0.89272   3
   2  -1   3 6.32526 0.71237   3
   2  -1   3 5.46457 0.76304   6
  -2  -1  -3 7.61778 0.99233   6
  -2  -1  -3 6.42071 0.71412   5
   2   1   3 6.42316 0.92988   6
   2   1   3 5.23821 0.72685   3
  -2   1  -3 5.00104 0.74297   7
   2   1   3 5.50491 0.82774   4
  -2   1  -3 5.14129 0.72694   3
  -3  -1  -3 2043.06 40.9214   5
   3  -1   3 1860.53 40.6718   3
   3  -1   3 1920.04 40.9819   7
  -3  -1  -3 1918.39 41.2268   6
  -3  -1  -3 1971.82 40.8851   3
   3  -1   3 1914.38 41.1263   5
   3  -1   3 1858.98 41.0636   6
  -3  -1  -3 1895.53 41.1146   4
  -3   1  -3 1912.12 40.8153   3
   3   1   3 1874.44 41.0299   4
   3   1   3 1920.97 41.1440   6
  -3   1  -3 1875.06 41.0034   6
  -3   1  -3 1829.11 41.1683   7
   3   1   3 1911.63 40.9668   3
   3   1   3 1920.36 40.8377   5
   4  -1   3 -0.1132 0.43234   6
   4  -1   3 0.63619 0.39612   3
   4  -1   3 -0.3382 0.29966   7
  -4  -1  -3 0.61415 0.44940   4
  -4  -1  -3 0.53642 0.50139   6
   4  -1   3 1.11761 0.60774   5
  -4  -1  -3 0.60313 0.48119   5
  -4  -1  -3 0.47716 0.44161   3
  -4   1  -3 1.28074 0.64397   7
   4   1   3 0.09996 0.46179   6
   4   1   3 0.51516 0.51739   4
   4   1   3 0.15765 0.46739   5
   4   1   3 0.24103 0.35646   3
  -4   1  -3 0.41548 0.43386   3
  -4   1  -3 -0.1161 0.27817   6
  -4   1  -3 0.21162 0.42293   5
  -5  -1  -3 22.0893 1.92405   6
  -5  -1  -3 18.4213 1.66901   4
  -5  -1  -3 20.3278 1.83906   5
   5  -1   3 20.4657 1.70562   7
  -5  -1  -3 20.7450 1.73605   7
   5  -1   3 19.8436 1.82910   5
   5  -1   3 22.1319 1.87987   6
  -5  -1  -3 20.8950 1.67785   3
   5  -1   3 21.3662 1.63209   3
  -5   1  -3 19.2900 1.96247   5
   5   1   3 21.8940 1.75653   4
  -5   1  -3 18.9073 1.87446   7
  -5   1  -3 20.3254 1.41417   4
  -5   1  -3 18.4742 1.70582   6
  -5   1  -3 20.7355 1.67767   3
   5   1   3 19.1210 1.69484   3
   5   1   3 21.6440 1.89186   6
   5   1   3 22.5423 1.79663   5
   6  -1   3 29.7894 2.36447   6
  -6  -1  -3 33.1341 2.29578   4
   6  -1   3 29.1045 2.04869   3
  -6  -1  -3 27.9894 2.37972   5
  -6  -1  -3 33.0462 2.38059   7
  -6  -1  -3 30.6767 2.47564   6
   6  -1   3 29.8283 2.38001   5
  -6  -1  -3 30.9329 2.18146   3
   6  -1   3 26.3915 2.11598   7
   6   1   3 28.5012 2.13922   4
  -6   1  -3 32.3197 2.58564   7
  -6   1  -3 29.4094 2.16050   3
   6   1   3 28.7994 2.20747   3
  -6   1  -3 31.0612 1.85574   4
  -6   1  -3 29.2132 2.28254   6
   6   1   3 30.1936 2.37780   6
   6   1   3 31.4015 2.69222   5
  -6   1  -3 31.2266 2.65146   5
  -7  -1  -3 895.699 20.9893   3
  -7  -1  -3 862.727 22.1434   5
   7  -1   3 877.731 21.7105   6
  -7  -1  -3 884.477 21.4956   7
   7  -1   3 850.907 21.2476   7
   7  -1   3 919.669 22.0782   5
  -7  -1  -3 840.980 22.4242   4
  -7  -1  -3 866.452 22.0314   6
   7  -1   3 848.130 20.8438   3
   7   1   3 882.514 21.1370   4
   7   1   3 865.004 21.7450   6
  -7   1  -3 850.406 20.1476   4
   7   1   3 935.308 21.7878   5
  -7   1  -3 875.527 22.6408   5
  -7   1  -3 874.784 21.7304   6
  -7   1  -3 838.996 22.0623   7
   7   1   3 854.388 21.2479   3
  -7   1  -3 890.010 21.0048   3
   8  -1   3 212.722 7.60162   7
  -8  -1  -3 221.287 8.50149   5
  -8  -1  -3 208.217 7.48934   4
  -8  -1  -3 219.523 7.86542   7
   8  -1   3 224.784 8.18220   5
  -8  -1  -3 216.315 8.22282   6
  -8  -1  -3 206.449 7.15686   3
   8  -1   3 210.622 7.23861   3
  -8   1  -3 208.150 8.61025   5
  -8   1  -3 223.011 8.07262   6
   8   1   3 200.663 7.46972   3
   8   1   3 224.613 7.93909   5
  -8   1  -3 262.245 13.4567   7
  -8   1  -3 220.887 6.72283   4
  -8   1  -3 216.707 7.31596   3
   8   1   3 223.278 7.50030   4
  -9  -1  -3 18.7982 2.11610   4
   9  -1   3 21.8982 3.05956   5
  -9  -1  -3 26.9737 2.99362   5
   9  -1   3 19.4614 2.79532   6
   9  -1   3 19.7754 2.20490   7
   9  -1   3 18.6909 2.10778   3
  -9  -1  -3 19.2352 2.72099   3
  -9  -1  -3 15.7850 2.23288   7
  -9  -1  -3 17.8353 2.52043   6
  -9   1  -3 17.4518 2.68823   7
   9   1   3 15.5935 2.33345   3
   9   1   3 22.9537 2.61448   6
   9   1   3 15.1790 2.11655   4
  -9   1  -3 17.7791 2.88144   5
   9   1   3 20.2750 2.72471   5
  -9   1  -3 22.2563 2.27439   3
  -9   1  -3 18.1489 1.73127   4
  -9   1  -3 22.9122 2.54748   6
 -10  -1  -3 710.103 20.5643   6
  10  -1   3 694.822 19.1809   3
 -10  -1  -3 737.148 19.4466   4
 -10  -1  -3 734.043 21.1485   5
 -10  -1  -3 747.941 18.8154   3
  10  -1   3 720.277 20.0217   6
 -10  -1  -3 724.678 20.0380   7
  10  -1   3 733.358 20.2693   5
  10  -1   3 699.521 20.5226   7
  10   1   3 735.739 19.0576   4
  10   1   3 727.461 20.1206   6
 -10   1  -3 727.484 20.9493   7
 -10   1  -3 738.476 18.9220   3
  10   1   3 728.122 19.9412   5
 -10   1  -3 721.764 17.9987   4
 -10   1  -3 733.759 21.5488   5
 -11  -1  -3 104.747 6.42475   6
 -11  -1  -3 114.405 5.36377   3
 -11  -1  -3 108.943 5.61226   4
  11  -1   3 115.495 6.24167   5
 -11  -1  -3 121.533 7.07319   5
 -11  -1  -3 110.167 6.20066   7
  11  -1   3 123.541 6.43788   6
  11  -1   3 104.290 5.42237   3
 -11   1  -3 111.628 6.97679   5
 -11   1  -3 118.611 6.91463   7
  11   1   3 103.434 5.85291   5
 -11   1  -3 109.191 6.18364   6
 -11   1  -3 106.541 5.50998   4
  11   1   3 116.564 6.31094   6
 -11   1  -3 117.961 5.48209   3
  11   1   3 116.442 5.94036   3
 -12  -1  -3 63.9632 5.42295   5
 -12  -1  -3 66.6493 4.16540   3
 -12  -1  -3 58.5818 4.77740   7
  12  -1   3 76.0515 5.18677   6
 -12  -1  -3 62.2339 4.27068   4
 -12   1  -3 62.5402 4.12616   3
 -12   1  -3 65.8829 5.57391   5
 -12   1  -3 63.1476 5.31488   7
  12   1   3 63.5490 4.90125   6
 -12   1  -3 64.2565 3.63348   4
 -13  -1  -3 13.1966 2.22900   3
 -13  -1  -3 14.9542 2.82210   7
 -13  -1  -3 12.1284 2.77772   5
  13  -1   3 14.1893 2.89746   6
 -13  -1  -3 14.3408 2.60391   4
 -13   1  -3 17.0765 3.36130   5
  13   1   3 9.73929 2.16202   6
 -13   1  -3 16.4504 3.31718   7
 -13   1  -3 14.9066 2.43414   3
 -13   1  -3 14.6538 2.06765   4
 -14  -1  -3 7.14581 2.38909   5
 -14  -1  -3 8.54895 2.36511   7
 -14  -1  -3 11.2195 2.24486   3
  14  -1   3 11.9896 2.89391   6
 -14   1  -3 11.1562 1.83481   4
 -14   1  -3 10.8777 3.14163   7
 -14   1  -3 9.56650 2.12740   3
  14   1   3 12.7046 2.58087   6
 -15  -1  -3 -0.3758 1.53311   4
 -15  -1  -3 -0.2077 1.39300   5
  15  -1   3 -0.3642 1.32747   6
 -15  -1  -3 0.99225 1.46496   7
 -15  -1  -3 0.27761 1.10545   3
 -15   1  -3 3.24911 1.95105   7
 -15   1  -3 -0.9082 0.99421   4
 -15   1  -3 0.20149 1.18891   3
  15   1   3 -0.1852 1.30118   6
  16  -1   3 5.51572 2.40459   6
 -16  -1  -3 5.79644 1.68510   3
 -16  -1  -3 7.99454 2.87708   5
 -16  -1  -3 7.07371 2.61676   7
 -16  -1  -3 -1.5265 2.07453   4
 -16   1  -3 2.56769 1.39394   3
  16   1   3 8.01942 2.66055   6
 -16   1  -3 5.08062 1.63660   4
 -16   1  -3 11.7574 3.22722   7
 -17  -1  -3 12.2956 3.53242   5
 -17  -1  -3 18.2003 3.76947   7
 -17  -1  -3 12.2984 2.14402   3
  17  -1   3 12.7729 3.25028   6
  17   1   3 13.7940 3.31192   6
 -17   1  -3 16.8069 4.53199   7
 -17   1  -3 18.6217 2.60647   3
 -18  -1  -3 10.3757 2.07501   3
 -18  -1  -3 7.97520 2.92409   7
 -18  -1  -3 5.77314 3.42268   5
  18  -1   3 9.90270 2.78619   6
  18   1   3 6.40307 2.58509   6
 -18   1  -3 13.1018 2.18867   3
 -18   1  -3 8.47022 3.18866   7
 -19  -2   3 11.9449 4.08788   5
 -19  -2   3 15.4654 3.81517   7
  19  -2  -3 10.2891 3.08499   6
  19   2  -3 11.7275 3.12494   6
 -19   2   3 10.0356 4.19713   7
 -18  -2   3 2.00131 2.79753   5
 -18  -2   3 4.33142 2.42216   7
  18  -2  -3 8.13535 2.95853   6
 -18   2   3 2.75009 2.98681   7
  18   2  -3 5.63591 2.34741   6
 -17  -2   3 0.40303 1.99376   7
  17  -2  -3 7.69790 2.51636   6
 -17  -2   3 5.88225 2.64789   5
 -17   2   3 8.16607 2.76174   7
  17   2  -3 3.23154 1.56843   6
 -16  -2   3 11.9191 3.78603   5
 -16  -2   3 11.5115 2.95380   7
  16  -2  -3 10.3064 2.95418   6
  16   2  -3 11.0065 2.80864   6
  16   2  -3 10.8986 2.34642   4
 -16   2   3 15.0923 3.83426   7
 -15  -2   3 10.6838 2.28619   4
 -15  -2   3 4.47575 2.06806   5
 -15  -2   3 4.91821 2.05124   7
  15  -2  -3 2.30468 1.69341   6
 -15   2   3 3.10513 2.01689   7
  15   2  -3 7.27162 2.04994   4
  15   2  -3 4.84002 2.12630   6
  14  -2  -3 6.13228 2.05638   6
 -14  -2   3 11.3738 2.54197   7
 -14  -2   3 12.7993 2.45398   4
 -14  -2   3 8.38342 2.92542   5
 -14  -2   3 12.6110 1.58982   3
  14   2  -3 10.8561 2.37050   4
  14   2  -3 8.56827 2.54241   6
  13  -2  -3 0.15788 1.10281   6
 -13  -2   3 1.68159 0.85853   3
 -13  -2   3 1.50460 1.07492   4
 -13  -2   3 0.20922 1.06512   7
 -13  -2   3 1.79793 1.42760   5
 -13   2   3 2.27022 1.86678   7
  13   2  -3 -0.0249 0.98678   6
  13   2  -3 0.86042 1.09014   4
 -12  -2   3 64.5718 4.46728   4
 -12  -2   3 65.3424 5.65823   5
  12  -2  -3 66.1735 4.59824   6
  12  -2  -3 59.8417 3.78916   3
 -12  -2   3 65.3397 3.26581   3
 -12  -2   3 57.1867 4.31314   7
 -12   2   3 58.8671 2.69320   3
  12   2  -3 64.2765 4.31501   3
  12   2  -3 65.8545 4.23690   4
 -12   2   3 59.2389 4.41244   6
 -12   2   3 60.9115 5.29308   7
  12   2  -3 58.4002 4.59160   6
  11  -2  -3 92.1525 5.15774   6
  11  -2  -3 87.5239 5.82882   5
  11  -2  -3 73.5437 4.09852   3
 -11  -2   3 83.7658 4.91985   7
 -11  -2   3 86.3586 3.80960   3
 -11  -2   3 89.9911 6.24841   5
 -11  -2   3 83.7391 4.91934   4
  11  -2  -3 84.7518 4.86692   7
 -11   2   3 82.0731 4.94919   6
  11   2  -3 74.4290 5.82655   5
  11   2  -3 86.7486 4.79987   4
  11   2  -3 87.0076 5.30662   6
 -11   2   3 86.7242 5.94373   7
 -11   2   3 91.7748 3.53882   3
 -10  -2   3 95.4867 4.83047   7
  10  -2  -3 94.5163 4.38305   3
 -10  -2   3 93.9345 6.07729   5
  10  -2  -3 90.9740 4.92828   6
 -10  -2   3 97.7922 3.98817   3
 -10  -2   3 91.0933 5.01906   4
  10  -2  -3 101.468 5.11863   7
  10  -2  -3 94.9655 5.85574   5
  10   2  -3 95.7701 5.32996   6
  10   2  -3 91.0256 4.81473   3
 -10   2   3 101.445 5.16459   6
 -10   2   3 93.8502 5.91312   7
 -10   2   3 93.2236 3.66721   3
  10   2  -3 101.177 5.63601   5
  10   2  -3 89.5450 4.95245   4
  -9  -2   3 124.718 5.32400   7
   9  -2  -3 128.892 4.97322   3
   9  -2  -3 122.953 5.49854   6
  -9  -2   3 120.963 4.51464   3
   9  -2  -3 129.855 5.75072   7
  -9  -2   3 117.989 5.62369   4
   9  -2  -3 129.515 6.61935   5
  -9   2   3 122.865 5.47360   6
   9   2  -3 134.269 5.57270   3
   9   2  -3 128.032 5.96927   6
   9   2  -3 130.439 5.64027   4
   9   2  -3 112.292 5.86947   5
  -9   2   3 119.951 6.41882   7
  -9   2   3 130.511 4.39818   3
  -8  -2   3 134.966 4.63586   3
   8  -2  -3 131.102 5.39321   6
  -8  -2   3 133.268 5.10412   7
   8  -2  -3 139.287 6.60729   5
   8  -2  -3 127.530 5.55841   7
  -8  -2   3 123.488 6.30090   5
  -8  -2   3 136.603 5.77832   4
   8  -2  -3 130.442 4.81569   3
  -8   2   3 132.648 5.43605   6
   8   2  -3 127.839 5.95982   5
  -8   2   3 134.000 6.42922   7
   8   2  -3 126.023 5.23016   3
  -8   2   3 127.644 4.35170   3
   8   2  -3 135.717 5.62198   4
  -7  -2   3 458.540 11.7583   7
  -7  -2   3 452.447 13.6504   5
  -7  -2   3 469.113 11.4463   3
   7  -2  -3 428.070 13.6115   5
   7  -2  -3 463.679 12.8424   7
  -7  -2   3 457.771 12.8577   4
   7  -2  -3 443.111 12.1559   6
   7   2  -3 458.444 12.9785   6
  -7   2   3 473.421 13.8074   7
  -7   2   3 460.321 11.1246   3
  -7   2   3 434.482 13.1624   6
   7   2  -3 455.039 13.1730   5
   7   2  -3 454.889 12.6809   4
   7   2  -3 454.652 12.1623   3
  -6  -2   3 220.146 6.25554   3
   6  -2  -3 223.063 6.39977   3
  -6  -2   3 210.626 7.29815   4
   6  -2  -3 215.672 6.71079   6
   6  -2  -3 212.524 8.03824   5
  -6  -2   3 218.630 7.81563   5
   6  -2  -3 220.366 7.41879   7
  -6  -2   3 218.772 6.31629   7
   6   2  -3 234.954 7.72577   5
   6   2  -3 221.774 6.83058   3
  -6   2   3 213.314 7.89089   7
  -6   2   3 225.281 6.06789   3
  -6   2   3 218.069 6.73915   6
   6   2  -3 218.709 7.41602   6
   6   2  -3 218.777 7.29345   4
   5  -2  -3 1460.85 33.5008   7
   5  -2  -3 1475.31 32.4724   6
  -5  -2   3 1485.86 32.0863   3
  -5  -2   3 1452.67 31.8463   7
  -5  -2   3 1489.42 33.5005   4
   5  -2  -3 1493.08 32.1924   3
   5   2  -3 1458.77 32.6565   3
  -5   2   3 1442.49 32.3893   6
   5   2  -3 1469.53 33.4120   4
   5   2  -3 1477.63 33.5442   6
  -5   2   3 1559.71 34.3641   7
  -5   2   3 1486.04 31.8324   3
  -4  -2   3 332.950 8.32365   3
   4  -2  -3 340.127 8.46251   6
  -4  -2   3 329.787 9.35712   4
   4  -2  -3 332.844 9.47990   7
   4  -2  -3 326.966 9.87252   5
  -4  -2   3 329.598 9.31922   5
   4  -2  -3 337.058 8.39480   3
   4   2  -3 323.049 9.26664   4
  -4   2   3 329.665 9.77711   7
   4   2  -3 323.259 8.69264   3
  -4   2   3 336.554 8.40130   6
   3  -2  -3 200.227 5.41689   6
  -3  -2   3 195.995 6.24517   4
  -3  -2   3 201.661 5.66774   3
   3  -2  -3 199.625 5.51602   3
  -3  -2   3 205.111 5.57288   3
  -3  -2   3 201.882 6.15194   5
   3  -2  -3 203.479 6.45851   7
  -3   2   3 206.677 6.68820   7
   3   2  -3 207.226 5.88772   3
  -3   2   3 206.798 5.34447   6
   3   2  -3 195.225 6.25388   4
  -2  -2   3 5.90860 0.97821   5
  -2  -2   3 4.44665 0.74409   3
   2  -2  -3 5.31359 0.56422   4
   2  -2  -3 4.40396 0.69305   3
  -2  -2   3 5.25198 0.82943   3
  -2  -2   3 5.50473 0.59448   7
   2  -2  -3 8.37546 1.36643   7
  -2  -2   3 5.50089 1.07686   4
   2   2  -3 5.94718 0.90147   3
  -2   2   3 6.06007 1.13367   7
  -2   2   3 5.50751 0.63135   6
   2   2  -3 5.06577 0.85585   4
  -2   2   3 5.91818 0.59989   4
  -1  -2   3 272.401 7.31165   4
  -1  -2   3 270.399 6.92163   3
  -1  -2   3 278.075 7.10368   3
  -1  -2   3 273.525 6.48958   7
   1  -2  -3 265.095 6.93727   3
   1  -2  -3 268.221 6.65159   4
   1  -2  -3 260.946 7.49911   7
   1   2  -3 269.342 7.03961   3
  -1   2   3 253.259 7.47664   7
   1   2  -3 257.030 7.05792   3
   1   2  -3 273.821 6.53304   7
  -1   2   3 265.862 6.63525   4
   0  -2  -3 425.215 10.3074   4
   0  -2   3 415.220 10.4204   4
   0  -2  -3 435.035 10.4750   3
   0  -2   3 445.285 10.6447   3
   0  -2   3 442.450 10.1519   7
   0  -2   3 439.241 10.3573   3
   0  -2  -3 424.353 10.8421   7
   0   2   3 423.130 10.3134   4
   0   2  -3 430.964 10.2376   7
   0   2   3 427.415 10.4136   3
  -1  -2  -3 446.640 11.3863   4
   1  -2   3 476.630 11.2627   7
   1  -2   3 460.209 11.1945   3
   1  -2   3 482.021 11.1165   4
  -1   2  -3 464.159 11.1673   4
  -1   2  -3 475.036 11.4391   7
   1   2   3 479.437 11.5010   3
   1   2   3 484.386 11.5057   4
  -1   2  -3 465.908 11.3605   3
   2  -2   3 172.417 5.21975   7
  -2  -2  -3 169.576 5.36357   4
  -2  -2  -3 168.488 5.20272   3
   2  -2   3 170.791 5.04315   3
  -2   2  -3 171.911 5.18181   6
  -2   2  -3 166.601 5.13745   3
   2   2   3 169.460 5.22359   6
   2   2   3 162.229 5.22570   3
  -2   2  -3 167.707 4.75319   4
   2   2   3 178.041 5.42935   4
   3  -2   3 655.125 15.4262   7
   3  -2   3 669.806 15.1399   3
  -3  -2  -3 633.896 15.1539   5
   3  -2   3 633.977 15.4660   6
  -3  -2  -3 636.679 15.2315   3
   3   2   3 634.025 15.4200   3
  -3   2  -3 621.878 15.1795   6
  -3   2  -3 642.417 15.2641   3
  -3   2  -3 631.856 15.7393   7
   3   2   3 658.500 15.6244   4
   3   2   3 616.681 15.3788   6
  -4  -2  -3 713.218 17.7368   6
   4  -2   3 728.805 17.7737   5
   4  -2   3 723.654 17.4636   6
   4  -2   3 714.799 16.8931   3
  -4  -2  -3 752.730 17.3036   5
   4  -2   3 732.312 17.4203   7
  -4  -2  -3 703.055 17.5561   4
  -4   2  -3 711.787 17.8963   7
   4   2   3 693.202 17.3070   3
  -4   2  -3 719.599 17.1444   3
   4   2   3 729.727 17.5749   6
   4   2   3 698.167 17.4626   4
  -4   2  -3 719.382 17.1924   6
  -5  -2  -3 83.9237 4.02433   4
   5  -2   3 84.7783 3.96743   6
   5  -2   3 83.4594 3.86717   7
   5  -2   3 88.2132 4.22636   5
  -5  -2  -3 82.9100 3.66004   3
  -5  -2  -3 96.3460 4.11877   5
  -5  -2  -3 85.4753 4.15131   6
  -5   2  -3 89.7922 4.35934   7
  -5   2  -3 86.3440 4.45884   6
   5   2   3 78.1558 3.81522   4
   5   2   3 93.3303 4.16945   6
   5   2   3 87.6191 3.95870   5
  -5   2  -3 86.3062 3.76757   3
  -6  -2  -3 347.950 10.2648   5
   6  -2   3 347.778 10.3001   6
   6  -2   3 334.474 10.0179   7
   6  -2   3 334.693 10.5188   5
  -6  -2  -3 339.573 9.65045   3
   6  -2   3 344.405 9.56111   3
  -6  -2  -3 338.962 10.5720   6
  -6  -2  -3 354.835 10.4072   4
   6   2   3 348.105 10.1553   3
  -6   2  -3 340.613 8.61137   4
   6   2   3 358.602 10.2899   5
   6   2   3 337.841 10.0872   4
  -6   2  -3 327.911 10.6865   7
  -6   2  -3 341.503 10.0420   6
   6   2   3 324.173 10.2008   6
  -6   2  -3 341.694 9.80685   3
  -7  -2  -3 75.9603 3.78406   7
   7  -2   3 64.9502 4.00416   5
  -7  -2  -3 65.9524 4.04205   6
   7  -2   3 61.6323 3.59942   7
  -7  -2  -3 68.1193 3.89071   4
   7  -2   3 63.3302 3.33571   3
   7  -2   3 64.4662 3.81660   6
  -7  -2  -3 67.5277 4.01195   5
  -7  -2  -3 68.9461 3.54748   3
   7   2   3 67.1444 3.77943   4
  -7   2  -3 72.1525 3.88024   6
   7   2   3 64.6579 3.76491   5
  -7   2  -3 65.3021 2.70505   4
   7   2   3 68.3800 4.01814   6
   7   2   3 66.0985 3.75348   3
  -7   2  -3 71.0314 3.69333   3
   8  -2   3 10.0943 2.05597   5
  -8  -2  -3 13.5652 2.24408   7
   8  -2   3 11.3649 1.92211   7
  -8  -2  -3 12.5112 1.84218   3
   8  -2   3 11.9555 2.05236   6
  -8  -2  -3 12.4458 2.30664   4
  -8  -2  -3 11.0903 2.23947   6
   8  -2   3 11.8648 1.74531   3
   8   2   3 9.76764 1.83936   6
  -8   2  -3 10.0512 1.73518   3
  -8   2  -3 8.62874 1.16834   4
   8   2   3 11.1802 2.03959   5
   8   2   3 9.51170 1.72089   3
   8   2   3 12.6978 2.20084   4
  -8   2  -3 14.2788 2.57457   7
  -8   2  -3 11.7501 1.85862   6
   9  -2   3 42.1887 3.22220   7
  -9  -2  -3 35.5179 2.99526   7
  -9  -2  -3 33.1497 3.33551   5
  -9  -2  -3 37.7462 2.87485   3
   9  -2   3 38.1244 3.26476   6
   9  -2   3 38.1309 3.36545   5
  -9  -2  -3 36.1227 3.37866   6
  -9  -2  -3 30.5889 2.93120   4
   9  -2   3 34.4114 2.72403   3
   9   2   3 32.6026 3.02200   3
   9   2   3 34.7626 3.08178   5
  -9   2  -3 36.3416 3.47474   3
   9   2   3 38.5972 3.69066   4
   9   2   3 42.8296 3.48104   6
  -9   2  -3 36.9174 3.13364   6
  -9   2  -3 38.0647 2.18906   4
  -9   2  -3 40.1961 3.75938   7
 -10  -2  -3 23.2053 3.52132   5
  10  -2   3 23.2134 3.08080   7
  10  -2   3 21.9045 3.18140   5
  10  -2   3 24.7991 2.59222   3
 -10  -2  -3 22.4447 2.72566   4
 -10  -2  -3 26.8210 3.07796   6
  10  -2   3 28.3093 3.10479   6
 -10  -2  -3 24.3318 2.81519   7
 -10  -2  -3 24.6882 2.59006   3
 -10   2  -3 31.4760 4.33373   7
  10   2   3 18.8612 2.85631   3
  10   2   3 29.4182 2.95405   4
 -10   2  -3 24.2367 1.87390   4
  10   2   3 30.4958 5.34357   5
 -10   2  -3 29.6372 2.83757   3
 -11  -2  -3 35.4551 3.52915   7
  11  -2   3 36.7020 3.61801   5
 -11  -2  -3 41.9858 3.32579   3
 -11  -2  -3 38.3189 4.10510   5
  11  -2   3 40.8258 3.83100   6
 -11  -2  -3 37.8035 3.53193   4
  11  -2   3 33.6025 3.06335   3
 -11   2  -3 37.0997 3.58667   6
 -11   2  -3 36.7849 3.24681   3
 -11   2  -3 35.4892 2.31512   4
  11   2   3 37.4657 3.76162   6
  11   2   3 39.5840 3.52835   4
  11   2   3 37.6645 3.56309   5
  11   2   3 34.8082 4.71228   3
 -11   2  -3 34.6140 4.12775   7
  12  -2   3 158.428 7.89051   6
 -12  -2  -3 144.983 8.42383   4
 -12  -2  -3 161.674 8.70505   5
 -12  -2  -3 144.934 7.43520   7
 -12  -2  -3 160.446 6.73371   3
  12   2   3 157.572 7.94895   6
 -12   2  -3 159.882 6.88690   3
  12   2   3 167.324 7.43236   4
 -12   2  -3 153.574 5.44819   4
 -12   2  -3 164.915 9.02324   7
 -13  -2  -3 34.3472 4.87983   5
 -13  -2  -3 37.3321 3.31849   3
 -13  -2  -3 33.1721 3.49599   4
  13  -2   3 40.4764 4.19113   6
 -13  -2  -3 34.2193 3.84662   7
 -13   2  -3 36.2245 3.33773   3
 -13   2  -3 29.8137 4.29721   7
  13   2   3 33.1923 3.90791   6
 -13   2  -3 37.5562 2.36647   4
 -14  -2  -3 85.5362 6.33899   4
  14  -2   3 93.6854 6.45025   6
 -14  -2  -3 91.7891 6.35402   7
 -14  -2  -3 99.2278 5.36672   3
 -14  -2  -3 92.0538 7.19194   5
 -14   2  -3 97.6177 5.48034   3
 -14   2  -3 92.8324 3.88247   4
 -14   2  -3 84.0385 7.03939   7
  14   2   3 83.3098 7.21598   6
 -15  -2  -3 5.26239 2.24350   7
 -15  -2  -3 5.36908 2.53032   5
 -15  -2  -3 5.24095 1.66450   3
  15  -2   3 5.65907 2.15839   6
 -15   2  -3 4.52400 1.73569   3
  15   2   3 6.51523 2.72234   6
 -15   2  -3 8.58178 2.84245   7
 -16  -2  -3 34.3245 3.21633   3
 -16  -2  -3 35.9084 5.40760   5
 -16  -2  -3 39.8107 4.68660   7
  16  -2   3 38.8406 4.58707   6
  16   2   3 29.5533 4.75738   6
 -16   2  -3 34.7181 3.43536   3
 -16   2  -3 30.8577 5.03206   7
  17  -2   3 9.17528 2.66498   6
 -17  -2  -3 8.00884 3.06065   5
 -17  -2  -3 7.24626 2.58480   7
 -17  -2  -3 8.67843 1.86421   3
  17   2   3 8.06292 2.81401   6
 -17   2  -3 12.1264 2.24733   3
 -17   2  -3 10.3917 4.13479   7
 -18  -2  -3 12.9130 2.33206   3
 -18  -2  -3 8.07313 2.88268   7
  18  -2   3 8.46498 2.76188   6
 -18  -2  -3 1.26494 2.97271   5
 -18   2  -3 11.9633 3.63294   7
 -18  -3   3 8.76678 2.82082   7
  18  -3  -3 9.84821 2.75866   6
 -18   3   3 4.64035 3.44623   7
  18   3  -3 5.97981 2.59625   6
 -17  -3   3 20.2109 4.30069   5
 -17  -3   3 20.4740 3.81552   7
  17  -3  -3 22.0599 3.71424   6
  17   3  -3 25.9709 4.46682   6
  17   3  -3 18.3994 3.28672   4
 -17   3   3 27.6956 5.28635   7
 -16  -3   3 4.98482 2.31949   7
  16  -3  -3 5.09720 2.09054   6
 -16  -3   3 4.70432 2.73136   5
 -16   3   3 4.61297 3.14387   7
  16   3  -3 2.82027 1.74365   4
  16   3  -3 3.26091 1.87265   6
 -15  -3   3 12.2102 2.62464   7
 -15  -3   3 14.4803 1.65791   3
 -15  -3   3 10.1877 3.25782   5
  15  -3  -3 13.6402 3.09772   6
 -15  -3   3 10.3604 1.56957   3
  15   3  -3 14.0366 3.08298   6
  15   3  -3 14.0885 2.88294   4
 -15   3   3 9.64289 3.04108   7
 -14  -3   3 9.72699 3.19947   5
 -14  -3   3 8.93031 1.52617   3
  14  -3  -3 8.38001 2.29857   6
 -14  -3   3 13.0347 1.78101   3
 -14  -3   3 9.45241 2.30644   7
  14   3  -3 7.63534 2.23670   6
 -14   3   3 13.1040 3.21123   7
  14   3  -3 12.3224 2.55177   4
  13  -3  -3 28.9838 3.38485   6
 -13  -3   3 38.8163 3.77240   4
 -13  -3   3 29.5027 3.26270   7
 -13  -3   3 29.7599 4.89262   5
 -13  -3   3 29.0471 2.91118   3
  13   3  -3 28.5210 3.12331   4
 -13   3   3 30.0977 5.18121   7
  13   3  -3 33.7758 3.86493   6
 -12  -3   3 36.9869 4.30197   5
 -12  -3   3 31.6562 3.46086   4
 -12  -3   3 33.6813 2.55453   3
  12  -3  -3 38.3015 3.03311   3
  12  -3  -3 28.9405 3.21860   6
 -12  -3   3 30.7456 3.08417   7
 -12   3   3 29.9410 3.17326   6
  12   3  -3 32.4800 3.35908   4
 -12   3   3 32.4236 4.85687   7
  12   3  -3 34.1993 3.72511   6
 -11  -3   3 32.7301 3.50896   7
 -11  -3   3 32.1488 2.45958   3
  11  -3  -3 30.3692 2.68447   3
 -11  -3   3 30.1170 3.13614   4
  11  -3  -3 33.4670 3.25435   6
 -11  -3   3 33.6565 4.78825   5
  11  -3  -3 32.2398 3.21208   7
  11   3  -3 32.8004 3.51505   6
 -11   3   3 33.5886 3.99173   7
 -11   3   3 33.7718 3.07629   6
  11   3  -3 29.2436 2.99946   3
  11   3  -3 37.5429 3.42944   4
 -10  -3   3 41.7561 2.68232   3
 -10  -3   3 33.6259 3.73858   5
 -10  -3   3 31.1442 3.16996   4
  10  -3  -3 34.5047 3.71078   5
 -10  -3   3 36.1167 2.84345   7
  10  -3  -3 39.7594 3.28424   6
  10  -3  -3 32.2257 3.06878   7
  10  -3  -3 39.0809 2.75711   3
  10   3  -3 34.4388 3.28858   4
  10   3  -3 36.2204 3.46123   5
  10   3  -3 37.6912 3.51040   6
 -10   3   3 36.1561 3.95719   7
 -10   3   3 40.6546 3.18172   6
  10   3  -3 35.6924 3.11817   3
 -10   3   3 39.6654 2.39240   3
   9  -3  -3 33.1863 2.48790   3
   9  -3  -3 31.5690 2.90961   7
   9  -3  -3 34.4237 3.50332   5
  -9  -3   3 34.3640 3.15521   4
   9  -3  -3 33.2253 2.88018   6
  -9  -3   3 34.9047 2.44048   3
  -9  -3   3 32.8755 3.46072   5
  -9  -3   3 34.0479 2.55168   7
   9   3  -3 31.5196 3.15040   6
   9   3  -3 38.0875 3.04826   3
  -9   3   3 35.7281 2.82593   6
  -9   3   3 40.7823 3.90532   7
   9   3  -3 35.0476 3.75581   5
   9   3  -3 33.0497 3.05926   4
  -9   3   3 35.8614 2.28080   3
   8  -3  -3 75.6391 3.62031   3
   8  -3  -3 69.2781 4.18969   7
  -8  -3   3 69.2196 4.63639   5
  -8  -3   3 76.2842 3.53396   7
   8  -3  -3 69.7834 4.79399   5
  -8  -3   3 73.3267 4.41726   4
   8  -3  -3 73.1040 3.93528   6
  -8  -3   3 76.7757 3.51836   3
   8   3  -3 72.5796 4.45734   4
   8   3  -3 73.3546 4.45439   5
  -8   3   3 75.5237 5.03852   7
   8   3  -3 67.5338 3.95302   3
   8   3  -3 74.5976 4.51390   6
  -8   3   3 73.4910 3.84009   6
  -8   3   3 72.9483 3.25863   3
   7  -3  -3 46.4170 3.63653   5
  -7  -3   3 48.5596 3.66969   5
   7  -3  -3 42.3118 2.59871   3
   7  -3  -3 44.7844 3.25642   7
  -7  -3   3 46.8691 2.60998   3
  -7  -3   3 41.4123 3.17688   4
   7  -3  -3 49.3432 2.99563   6
  -7  -3   3 45.3443 2.48226   7
  -7   3   3 43.4886 4.28557   7
  -7   3   3 46.7996 2.81969   6
  -7   3   3 44.4120 2.45668   3
   7   3  -3 44.0567 2.98524   3
   7   3  -3 50.9901 3.54349   5
   7   3  -3 43.9822 3.21869   4
  -6  -3   3 37.8065 2.32580   3
  -6  -3   3 43.9109 3.20514   5
   6  -3  -3 40.9999 2.53339   6
  -6  -3   3 40.4345 2.14302   7
   6  -3  -3 38.7788 2.90478   7
   6  -3  -3 40.9579 2.41984   3
   6  -3  -3 39.4074 3.23685   5
  -6  -3   3 38.7867 2.92536   4
   6   3  -3 40.7909 2.71247   3
  -6   3   3 38.8457 2.38374   6
   6   3  -3 33.6094 2.79587   6
  -6   3   3 42.1128 2.28146   3
   6   3  -3 37.5760 2.89656   4
   5  -3  -3 10.4883 1.39121   3
   5  -3  -3 8.66098 1.28009   6
  -5  -3   3 5.52662 1.17947   4
  -5  -3   3 8.58890 1.65491   5
   5  -3  -3 7.09582 1.43633   5
  -5  -3   3 7.73777 1.21097   3
   5  -3  -3 9.49089 1.65862   7
   5   3  -3 7.53918 1.59453   4
   5   3  -3 8.86859 1.48079   3
  -5   3   3 7.32524 1.11356   6
  -5   3   3 5.44483 1.46324   7
   4  -3  -3 332.690 7.27037   4
   4  -3  -3 308.936 10.7606   7
  -4  -3   3 312.365 9.36500   5
  -4  -3   3 309.627 8.81697   3
  -4  -3   3 321.476 8.71263   3
   4  -3  -3 328.488 8.73760   3
   4   3  -3 317.712 9.18467   3
  -4   3   3 316.832 7.25348   4
  -4   3   3 324.737 8.41388   6
  -4   3   3 304.955 10.0539   7
   4   3  -3 321.332 9.67862   4
  -3  -3   3 1124.13 26.3051   5
  -3  -3   3 1146.29 25.9350   3
   3  -3  -3 1135.44 26.9295   7
  -3  -3   3 1171.40 26.8051   4
   3  -3  -3 1181.85 24.7167   4
   3  -3  -3 1136.08 25.7533   3
  -3  -3   3 1177.07 25.9565   3
  -3   3   3 1156.38 24.6522   4
  -3   3   3 1114.98 27.2272   7
   3   3  -3 1136.55 26.2590   3
  -3   3   3 1147.65 25.2796   6
   3   3  -3 1126.93 26.7121   4
  -2  -3   3 1122.17 25.4437   3
   2  -3  -3 1166.89 26.4963   7
  -2  -3   3 1121.58 24.7988   7
  -2  -3   3 1149.08 25.6541   3
   2  -3  -3 1109.88 25.3179   3
   2  -3  -3 1163.65 24.7215   4
  -2  -3   3 1097.00 25.9765   4
  -2   3   3 1144.39 24.6713   4
   2   3  -3 1126.28 26.1340   4
   2   3  -3 1102.79 25.7541   3
  -2   3   3 1105.64 26.5141   7
  -1  -3   3 962.712 21.5049   7
  -1  -3   3 941.921 22.2759   4
   1  -3  -3 943.927 22.6994   7
   1  -3  -3 933.119 21.5334   4
  -1  -3   3 966.432 21.9576   3
  -1  -3   3 982.143 22.2832   3
   1  -3  -3 970.832 22.1429   3
  -1   3   3 943.892 21.5093   4
  -1   3   3 975.444 22.8493   7
   1   3  -3 979.035 22.4802   4
   1   3  -3 921.336 22.1286   3
   1   3  -3 1002.12 21.6703   7
   1   3  -3 959.713 22.1635   3
   0  -3   3 379.424 9.88456   7
   0  -3  -3 391.642 10.7066   7
   0  -3   3 375.586 10.1379   4
   0  -3  -3 395.389 10.0865   4
   0  -3  -3 399.082 10.3947   3
   0  -3   3 375.386 10.0450   3
   0  -3   3 386.357 10.4116   3
   0   3  -3 392.309 10.1280   7
   0   3   3 399.998 10.1359   4
   0   3  -3 394.522 10.3207   4
   0   3   3 384.212 10.1770   3
   1  -3   3 911.335 21.2902   3
   1  -3   3 915.722 21.3315   7
   1  -3   3 947.619 21.1549   4
  -1  -3  -3 924.016 21.6206   3
   1   3   3 918.477 21.5435   4
   1   3   3 915.416 21.6138   3
  -1   3  -3 928.052 21.5596   3
  -1   3  -3 940.003 21.6777   7
  -1   3  -3 945.911 21.3129   4
   2  -3   3 218.057 6.61234   3
  -2  -3  -3 218.744 6.85313   3
   2  -3   3 217.098 6.76079   7
   2  -3   3 230.501 6.25283   4
  -2   3  -3 217.771 6.81541   3
   2   3   3 218.196 6.94551   3
  -2   3  -3 222.745 6.35519   4
  -2   3  -3 219.359 6.71765   6
  -2   3  -3 214.590 7.08140   7
   2   3   3 219.504 6.94627   4
  -3  -3  -3 2300.71 50.0893   3
  -3  -3  -3 2250.43 50.4440   4
   3  -3   3 2309.79 49.7684   3
   3  -3   3 2320.47 50.2694   7
  -3   3  -3 2359.92 50.1878   3
  -3   3  -3 2326.44 50.8759   7
  -3   3  -3 2327.39 49.1365   4
  -3   3  -3 2278.28 49.8912   6
   3   3   3 2282.23 50.3589   3
   3   3   3 2280.33 50.4460   4
   3   3   3 2308.78 50.3005   6
  -4  -3  -3 787.095 18.9036   3
  -4  -3  -3 808.467 19.0505   5
   4  -3   3 781.525 19.2503   6
   4  -3   3 760.412 18.5946   3
   4  -3   3 777.178 19.1637   7
  -4   3  -3 772.360 18.9825   3
   4   3   3 768.636 19.2641   6
   4   3   3 753.881 19.3278   4
  -4   3  -3 778.549 18.9000   6
   4   3   3 788.354 19.3474   3
  -4   3  -3 773.783 19.8443   7
  -4   3  -3 815.191 17.8104   4
  -5  -3  -3 662.031 16.7260   5
   5  -3   3 658.971 17.3118   5
   5  -3   3 634.543 16.7135   7
  -5  -3  -3 644.655 17.1302   4
  -5  -3  -3 645.409 16.3510   3
   5  -3   3 685.648 17.0001   6
   5  -3   3 642.805 16.1448   3
   5   3   3 634.547 16.9178   4
  -5   3  -3 661.300 15.0089   4
  -5   3  -3 656.795 16.4084   6
  -5   3  -3 673.654 16.5982   3
   5   3   3 635.624 16.9241   6
   5   3   3 634.704 16.8398   3
  -5   3  -3 645.408 17.6292   7
   6  -3   3 939.883 23.2170   7
  -6  -3  -3 957.795 23.7296   4
   6  -3   3 932.069 23.2388   6
  -6  -3  -3 939.973 22.6064   3
  -6  -3  -3 942.406 23.1785   5
   6  -3   3 947.902 23.8738   5
   6  -3   3 938.559 22.4699   3
  -6   3  -3 993.509 23.0086   3
   6   3   3 939.147 23.3474   3
   6   3   3 916.914 23.3380   4
  -6   3  -3 945.176 22.8942   6
  -6   3  -3 939.166 24.3628   7
  -6   3  -3 939.667 20.9258   4
   6   3   3 937.751 23.4735   6
  -7  -3  -3 213.308 7.31517   3
  -7  -3  -3 206.794 8.05751   4
   7  -3   3 215.757 7.77871   7
   7  -3   3 210.815 7.14839   3
   7  -3   3 213.239 8.30963   5
  -7  -3  -3 207.275 7.92350   5
   7  -3   3 207.853 7.85448   6
  -7   3  -3 212.221 7.47482   3
  -7   3  -3 205.834 8.60623   7
   7   3   3 214.072 7.89734   4
  -7   3  -3 202.070 7.41924   6
  -7   3  -3 213.863 5.79353   4
   7   3   3 198.511 7.82843   6
   7   3   3 217.431 7.97866   3
   8  -3   3 155.630 7.16183   5
   8  -3   3 169.029 6.99490   6
   8  -3   3 150.101 6.50162   7
  -8  -3  -3 152.549 6.15409   7
  -8  -3  -3 156.788 6.98017   4
  -8  -3  -3 156.567 6.97172   5
   8  -3   3 148.167 5.98186   3
  -8  -3  -3 159.218 6.18647   3
  -8   3  -3 154.652 6.35150   3
  -8   3  -3 152.999 6.45678   6
   8   3   3 162.518 6.83566   4
  -8   3  -3 159.568 7.70592   7
   8   3   3 153.347 6.73005   3
  -8   3  -3 156.917 4.62766   4
   8   3   3 162.293 7.02701   6
  -9  -3  -3 225.209 9.07899   5
  -9  -3  -3 222.374 8.05907   7
   9  -3   3 220.486 8.65835   6
   9  -3   3 210.075 8.27459   7
   9  -3   3 208.162 7.68855   3
  -9  -3  -3 238.598 9.11038   4
  -9  -3  -3 219.541 7.80286   3
   9  -3   3 223.205 9.10803   5
  -9   3  -3 210.292 8.23632   6
   9   3   3 219.463 8.54848   4
  -9   3  -3 216.344 9.66649   7
   9   3   3 204.060 8.61189   6
  -9   3  -3 213.556 7.96097   3
  -9   3  -3 213.579 5.92089   4
 -10  -3  -3 10.7582 1.96100   3
  10  -3   3 12.0986 2.00851   3
  10  -3   3 10.0060 2.39355   6
 -10  -3  -3 9.10593 2.03795   4
  10  -3   3 12.2892 2.36190   5
 -10  -3  -3 13.2192 2.15216   7
 -10  -3  -3 13.0056 2.50995   5
  10  -3   3 5.96205 1.53217   7
 -10   3  -3 9.50112 1.86834   3
  10   3   3 12.2149 2.38790   4
 -10   3  -3 10.7574 2.17780   6
 -10   3  -3 7.37477 2.45289   7
  10   3   3 11.4509 2.34094   6
  10   3   3 9.34118 2.02901   3
 -10   3  -3 11.5376 1.11400   4
 -11  -3  -3 27.5135 3.02252   7
 -11  -3  -3 26.4614 2.76916   3
 -11  -3  -3 24.7277 2.97157   4
  11  -3   3 29.4558 3.92059   6
  11  -3   3 29.0268 3.28372   5
 -11  -3  -3 27.1400 4.08136   5
  11   3   3 28.2852 4.28553   6
  11   3   3 26.2061 3.20359   4
 -11   3  -3 36.7657 5.28891   7
 -11   3  -3 22.8710 2.74369   3
 -11   3  -3 28.7517 3.75700   6
 -12  -3  -3 1.09429 1.39238   5
 -12  -3  -3 3.69712 1.51855   4
  12  -3   3 3.67344 1.75809   6
 -12  -3  -3 1.94471 1.35417   7
 -12  -3  -3 2.77126 1.41095   3
  12   3   3 2.87263 1.55369   4
 -12   3  -3 0.60064 1.14944   3
 -12   3  -3 4.32761 1.84642   7
  12   3   3 3.88715 1.89130   6
 -13  -3  -3 64.7564 4.33518   3
  13  -3   3 63.5629 5.30178   6
 -13  -3  -3 65.5875 5.91494   5
 -13  -3  -3 81.6241 5.44181   7
  13   3   3 61.3488 5.31246   6
  13   3   3 64.6242 4.88301   4
 -13   3  -3 77.4549 6.63358   7
 -13   3  -3 63.8386 4.48597   3
 -14  -3  -3 28.6130 3.12823   3
 -14  -3  -3 17.1452 4.59955   5
  14  -3   3 24.8111 4.12424   6
 -14  -3  -3 23.1416 3.56683   7
 -14   3  -3 28.2323 3.48057   3
  14   3   3 22.4265 3.79328   6
  14   3   3 25.0697 3.87206   4
 -14   3  -3 21.2307 4.48923   7
 -15  -3  -3 91.7942 5.24677   3
  15  -3   3 96.9072 6.85004   6
 -15  -3  -3 81.0346 7.16037   5
 -15  -3  -3 92.8986 6.56418   7
 -15   3  -3 92.6587 5.38947   3
  15   3   3 96.8209 6.97603   6
 -15   3  -3 89.5221 7.81778   7
  16  -3   3 41.8315 4.82853   6
 -16  -3  -3 49.5354 3.87142   3
 -16  -3  -3 29.1297 5.12866   5
 -16  -3  -3 41.6707 4.79394   7
 -16   3  -3 42.9380 6.35010   7
  16   3   3 44.2166 5.20475   6
 -16   3  -3 43.7345 3.77135   3
  17  -3   3 37.0001 5.28058   6
 -17  -3  -3 45.3988 3.81291   3
 -17  -3  -3 38.6303 6.26319   5
 -17  -3  -3 43.4300 4.99394   7
  17   3   3 53.9454 5.90947   6
 -17   3  -3 45.6025 3.77672   3
 -17   3  -3 56.0991 7.52857   7
 -18  -3  -3 43.4740 7.74825   5
 -18  -3  -3 49.1888 5.89012   7
  18  -3   3 40.3104 5.45644   6
 -18  -3  -3 44.6092 3.92724   3
  18   3   3 38.3617 5.16615   6
 -18  -4   3 4.26406 2.56808   7
 -18  -4   3 2.89464 2.80050   5
  18  -4  -3 7.35637 2.85085   6
  18   4  -3 7.31255 2.78962   6
  18   4  -3 5.65066 2.35887   4
 -18   4   3 10.3222 4.66863   7
  17  -4  -3 14.3355 3.29120   6
 -17  -4   3 15.1025 4.60083   5
 -17  -4   3 12.7209 2.82184   7
  17   4  -3 9.04653 2.90967   6
  17   4  -3 14.2311 2.98304   4
 -17   4   3 11.9112 3.65292   7
  16  -4  -3 1.72794 1.75378   6
 -16  -4   3 1.47054 1.92854   7
 -16  -4   3 5.20489 2.76400   5
  16   4  -3 5.81627 2.88247   4
 -16   4   3 2.45677 3.25843   7
  16   4  -3 5.73878 2.43941   6
 -15  -4   3 -0.2120 1.36845   7
  15  -4  -3 0.03322 1.41667   6
 -15  -4   3 0.41831 1.95134   5
 -15  -4   3 1.78500 1.05455   3
  15   4  -3 2.03670 1.63950   4
 -15   4   3 -1.0998 1.80020   7
  15   4  -3 1.80064 1.66002   6
  14  -4  -3 16.0303 2.99434   6
 -14  -4   3 17.7955 3.95638   5
 -14  -4   3 21.6787 2.33384   3
 -14  -4   3 19.8393 3.08061   7
 -14  -4   3 20.2027 2.40084   3
  14   4  -3 18.6987 3.02196   4
  14   4  -3 23.2392 3.70922   6
 -14   4   3 18.9867 4.51015   7
  13  -4  -3 6.23909 1.91662   6
 -13  -4   3 3.75596 1.59849   7
 -13  -4   3 4.26603 1.39673   3
 -13  -4   3 9.07987 2.78283   5
 -13  -4   3 8.94263 1.72681   3
  13   4  -3 6.78547 2.23958   4
  13   4  -3 5.63538 2.14443   6
 -13   4   3 4.77475 2.67283   7
 -12  -4   3 2.20390 1.09594   3
 -12  -4   3 2.12302 1.61195   5
 -12  -4   3 0.77937 1.05485   7
 -12  -4   3 0.36706 0.91922   3
  12  -4  -3 0.61516 0.90022   6
 -12   4   3 1.33795 1.20187   6
 -12   4   3 0.34351 1.86170   7
  12   4  -3 -1.2953 1.07599   6
  12   4  -3 -0.5311 0.95944   4
  11  -4  -3 0.20511 0.89866   6
  11  -4  -3 0.10222 0.72432   3
 -11  -4   3 -2.1238 0.76289   4
 -11  -4   3 1.55116 1.41694   5
 -11  -4   3 1.59713 0.99427   7
 -11  -4   3 -1.1996 0.68702   3
 -11  -4   3 1.36693 0.84642   3
  11   4  -3 -1.2280 0.86353   4
 -11   4   3 1.25016 1.18008   6
 -11   4   3 -0.2707 1.05349   7
  11   4  -3 -0.1432 1.24785   6
 -10  -4   3 1.06399 0.87174   7
 -10  -4   3 -0.8305 0.98531   4
 -10  -4   3 1.11846 1.18766   5
 -10  -4   3 0.85563 0.83772   3
  10  -4  -3 -0.2029 0.88997   6
  10  -4  -3 0.30646 0.82901   7
  10  -4  -3 -2.0883 1.15225   5
  10   4  -3 0.33505 0.96385   3
  10   4  -3 -0.9051 0.85789   6
  10   4  -3 0.71868 1.04197   4
 -10   4   3 0.79048 1.22615   7
 -10   4   3 0.22933 0.76722   6
  -9  -4   3 256.875 8.04005   7
  -9  -4   3 259.823 8.85629   3
   9  -4  -3 235.941 9.41642   7
   9  -4  -3 246.470 10.5097   5
   9  -4  -3 234.686 10.1903   6
   9  -4  -3 257.758 8.45224   3
  -9  -4   3 266.509 10.4139   5
  -9  -4   3 245.864 9.85049   4
   9   4  -3 241.127 9.49288   3
  -9   4   3 253.747 8.72966   6
  -9   4   3 252.771 10.9390   7
   9   4  -3 254.966 9.75139   4
   9   4  -3 264.837 10.0699   6
  -8  -4   3 442.718 14.0503   5
  -8  -4   3 446.544 11.6340   7
   8  -4  -3 415.782 14.4365   5
  -8  -4   3 454.241 12.0812   3
   8  -4  -3 421.493 12.1535   3
   8  -4  -3 415.497 13.4400   7
  -8  -4   3 421.417 13.8095   4
   8  -4  -3 432.518 12.7173   6
   8   4  -3 420.961 13.2419   3
   8   4  -3 450.677 13.9616   6
  -8   4   3 450.476 15.1436   7
  -8   4   3 421.821 12.2709   6
   8   4  -3 442.130 13.7978   4
  -7  -4   3 127.673 6.23339   4
  -7  -4   3 128.806 4.61082   7
   7  -4  -3 137.745 6.84330   5
   7  -4  -3 121.758 5.10606   3
   7  -4  -3 127.923 6.11759   7
  -7  -4   3 122.058 5.01321   3
  -7  -4   3 133.463 6.25623   5
  -7   4   3 136.880 7.04516   7
  -7   4   3 128.500 5.17270   6
   7   4  -3 120.751 5.74430   3
   7   4  -3 133.882 6.32721   6
   7   4  -3 129.586 6.18038   4
   6  -4  -3 34.8072 3.19623   5
  -6  -4   3 34.4232 2.47029   3
  -6  -4   3 26.2373 2.66334   4
  -6  -4   3 34.3381 2.94186   5
   6  -4  -3 30.6398 2.81283   7
   6  -4  -3 31.2557 2.36129   3
  -6  -4   3 34.2679 2.52780   3
   6   4  -3 30.3885 2.63981   3
  -6   4   3 28.9707 3.16929   7
  -6   4   3 34.5282 2.68108   6
   6   4  -3 36.1281 3.16026   6
  -5  -4   3 132.976 5.70850   5
  -5  -4   3 136.352 5.14841   3
  -5  -4   3 119.155 5.70045   4
   5  -4  -3 123.772 4.96830   3
  -5  -4   3 127.847 6.08232   3
   5   4  -3 128.561 5.84516   4
  -5   4   3 124.761 4.67439   6
  -5   4   3 131.556 3.54059   4
   5   4  -3 131.935 5.55455   3
  -5   4   3 133.042 6.45729   7
  -4  -4   3 1.04532 0.81381   4
  -4  -4   3 2.31688 0.86436   3
   4  -4  -3 1.50729 0.90851   7
  -4  -4   3 3.08834 0.96741   3
  -4  -4   3 0.85186 0.73883   5
   4  -4  -3 0.81607 0.60048   3
   4  -4  -3 0.33359 0.42291   4
  -4   4   3 0.44623 0.72020   7
   4   4  -3 1.61985 0.79197   3
   4   4  -3 0.89747 0.72910   4
  -4   4   3 2.00284 0.56000   4
  -4   4   3 1.64469 0.67110   6
  -3  -4   3 152.970 5.57074   3
   3  -4  -3 146.648 6.25892   3
  -3  -4   3 147.296 5.56262   3
   3  -4  -3 148.663 4.67576   4
  -3  -4   3 147.471 5.98333   4
  -3  -4   3 152.962 5.06619   7
   3  -4  -3 143.752 6.07308   7
   3   4  -3 157.467 6.16728   4
   3   4  -3 144.000 5.73943   3
  -3   4   3 146.243 4.64349   4
  -3   4   3 144.119 6.35490   7
  -3   4   3 147.896 5.02449   6
   2  -4  -3 181.350 6.31178   3
  -2  -4   3 182.386 6.29605   3
   2  -4  -3 172.408 6.62436   7
   2  -4  -3 170.099 5.44760   4
  -2  -4   3 163.401 6.26354   4
   2  -4  -3 174.477 6.89850   3
  -2  -4   3 163.321 5.93451   3
  -2  -4   3 166.634 5.55056   7
  -2   4   3 172.397 5.45338   4
  -2   4   3 167.388 6.72256   7
   2   4  -3 171.188 6.44323   4
   1  -4  -3 83.7416 4.07309   3
   1  -4  -3 86.0247 4.33990   7
  -1  -4   3 81.9883 3.62516   7
  -1  -4   3 88.0659 4.15561   3
   1  -4  -3 86.2596 3.68055   4
   1  -4  -3 86.9872 4.01609   3
  -1  -4   3 85.7708 3.87252   3
  -1  -4   3 91.3429 4.16107   4
   1   4  -3 88.7168 3.79702   7
   1   4  -3 93.7658 4.27315   4
  -1   4   3 90.8918 3.70215   4
  -1   4   3 87.6252 4.41275   7
   1   4  -3 88.0765 4.89374   3
   0  -4  -3 546.971 14.6212   3
   0  -4  -3 560.976 14.2727   4
   0  -4   3 564.626 14.2045   7
   0  -4   3 576.621 14.5049   4
   0  -4  -3 555.951 15.0264   7
   0  -4   3 543.433 14.4802   3
   0   4  -3 578.591 14.5220   7
   0   4  -3 558.132 14.5099   4
   0   4  -3 552.012 14.5958   3
   0   4   3 576.294 14.2833   4
   0   4   3 538.652 14.3580   3
  -1  -4  -3 196.542 6.92781   3
   1  -4   3 198.642 7.05717   3
  -1  -4  -3 200.293 6.84119   4
   1  -4   3 204.521 6.52267   4
   1  -4   3 206.243 6.72913   7
   1  -4   3 191.069 7.53708   3
  -1  -4  -3 214.226 7.26979   7
   1   4   3 195.319 6.89360   3
  -1   4  -3 198.884 6.95404   7
   1   4   3 206.149 6.82867   4
  -1   4  -3 207.015 6.99317   3
  -1   4  -3 200.381 6.62774   4
   2  -4   3 3.70408 0.87203   4
   2  -4   3 2.78082 0.91490   7
   2  -4   3 3.49352 0.88098   3
  -2  -4  -3 3.82429 1.05166   3
  -2  -4  -3 2.84999 0.85940   4
   2   4   3 3.27064 0.99228   4
  -2   4  -3 5.32162 1.17811   4
  -2   4  -3 3.40661 1.01311   7
   2   4   3 4.10808 1.03958   3
  -2   4  -3 5.57249 1.22866   3
   3  -4   3 22.4718 2.10057   7
  -3  -4  -3 25.9307 2.23693   3
   3  -4   3 22.7090 1.94387   3
   3   4   3 23.8912 2.26864   4
  -3   4  -3 24.2100 2.20947   3
  -3   4  -3 21.7493 1.75133   4
  -3   4  -3 21.4832 2.27478   7
  -3   4  -3 22.6694 1.96727   6
   3   4   3 23.9203 2.23340   3
  -4  -4  -3 52.2761 3.43856   4
   4  -4   3 52.4180 3.28106   7
   4  -4   3 49.2107 2.94318   3
  -4  -4  -3 50.7830 3.21789   3
  -4   4  -3 49.1675 3.56395   7
   4   4   3 50.1840 3.31557   3
  -4   4  -3 51.9840 3.03629   6
  -4   4  -3 54.5059 2.65849   4
  -4   4  -3 54.1991 3.31134   3
   4   4   3 53.0869 3.37950   6
   4   4   3 51.4374 3.40166   4
  -5  -4  -3 169.619 7.07444   4
   5  -4   3 174.152 6.34886   3
  -5  -4  -3 178.401 6.75499   5
  -5  -4  -3 172.298 6.53164   3
   5   4   3 179.118 7.01462   3
  -5   4  -3 172.112 6.62878   3
  -5   4  -3 175.922 6.44272   6
   5   4   3 181.606 7.05575   6
  -5   4  -3 172.140 5.41643   4
  -5   4  -3 183.239 7.66249   7
   6  -4   3 57.6665 3.36196   3
  -6  -4  -3 48.1900 4.14792   3
  -6  -4  -3 59.1272 3.98524   4
   6  -4   3 56.4025 3.93504   5
   6  -4   3 56.9138 3.70847   7
   6   4   3 51.8654 3.63648   3
  -6   4  -3 58.5667 4.28514   7
  -6   4  -3 55.7693 3.40812   6
  -6   4  -3 56.5576 3.62784   3
   6   4   3 58.8190 3.91379   6
  -6   4  -3 57.7564 2.54568   4
   6   4   3 58.2405 3.90573   4
   7  -4   3 176.667 7.35253   6
   7  -4   3 171.891 6.57535   3
  -7  -4  -3 167.128 7.46627   4
   7  -4   3 170.997 7.10494   7
   7  -4   3 176.412 7.73586   5
  -7  -4  -3 167.988 7.08079   5
  -7  -4  -3 176.110 6.77155   3
   7   4   3 176.538 7.46647   6
  -7   4  -3 171.270 8.10202   7
   7   4   3 179.316 7.49240   4
   7   4   3 165.125 7.23414   3
  -7   4  -3 171.956 5.05320   4
  -7   4  -3 174.665 6.81006   6
  -7   4  -3 173.011 10.1973   3
   8  -4   3 39.4812 3.68992   5
   8  -4   3 41.9382 3.15724   3
  -8  -4  -3 35.9283 3.52116   4
   8  -4   3 38.3873 3.86802   7
   8  -4   3 41.7455 3.57700   6
  -8  -4  -3 43.3003 3.66703   5
  -8  -4  -3 40.9521 3.24785   3
   8   4   3 39.8461 3.52971   4
  -8   4  -3 45.2970 1.91360   4
   8   4   3 39.7188 3.64359   6
  -8   4  -3 38.2490 3.13947   6
  -8   4  -3 46.4479 4.29163   7
  -8   4  -3 46.8591 3.53250   3
  -8   4  -3 46.2762 1.99650   4
   9  -4   3 140.418 6.85479   6
   9  -4   3 140.201 6.04895   3
  -9  -4  -3 139.695 6.05813   7
  -9  -4  -3 134.216 7.12005   4
  -9  -4  -3 136.214 6.87657   5
  -9  -4  -3 137.388 6.08057   3
   9  -4   3 130.947 6.44539   7
  -9   4  -3 125.900 6.55449   6
  -9   4  -3 140.528 6.41748   3
  -9   4  -3 127.577 7.57578   7
   9   4   3 129.978 6.73678   3
   9   4   3 148.533 7.03108   4
 -10  -4  -3 35.8895 3.70072   4
 -10  -4  -3 48.0142 4.41056   5
  10  -4   3 38.2145 3.88520   5
 -10  -4  -3 37.6939 3.38995   3
 -10  -4  -3 44.1211 3.56412   7
  10  -4   3 41.2488 3.97830   6
  10   4   3 42.8320 4.10424   6
  10   4   3 44.7587 4.06931   4
 -10   4  -3 46.7231 3.69219   6
 -10   4  -3 42.5396 3.57577   3
 -10   4  -3 46.2559 4.86836   7
 -11  -4  -3 328.228 10.8748   3
 -11  -4  -3 331.331 12.8941   5
  11  -4   3 336.946 12.3846   6
 -11  -4  -3 302.906 10.8813   7
 -11   4  -3 320.329 13.8693   7
  11   4   3 312.460 11.9321   4
 -11   4  -3 338.947 11.3958   3
  11   4   3 333.237 12.5279   6
 -12  -4  -3 101.572 7.11114   5
 -12  -4  -3 112.578 6.14508   7
 -12  -4  -3 115.575 5.77865   3
  12  -4   3 115.802 6.91384   6
  12   4   3 117.556 6.84763   4
  12   4   3 110.124 6.92261   6
 -12   4  -3 110.985 6.02402   3
 -12   4  -3 99.3402 7.58655   7
 -13  -4  -3 195.480 10.4202   5
 -13  -4  -3 210.381 9.13887   7
  13  -4   3 221.501 10.1901   6
 -13  -4  -3 202.262 8.20429   3
  13   4   3 198.520 10.0160   6
  13   4   3 191.867 9.37071   4
 -13   4  -3 211.637 8.68452   3
 -14  -4  -3 175.483 10.1951   5
 -14  -4  -3 186.944 7.81259   3
 -14  -4  -3 179.234 8.71407   7
  14   4   3 172.695 8.92759   4
 -14   4  -3 184.847 8.05956   3
  14   4   3 178.496 9.54826   6
 -14   4  -3 165.412 10.7936   7
 -15  -4  -3 1.88214 1.74591   7
  15  -4   3 1.39291 1.50917   6
 -15  -4  -3 -0.8736 1.46245   5
 -15  -4  -3 1.16337 1.36168   3
 -15   4  -3 1.36638 1.93875   7
 -15   4  -3 2.48175 1.43248   3
  15   4   3 1.68941 1.82351   6
 -16  -4  -3 1.52399 1.53824   3
 -16  -4  -3 3.90206 2.02239   7
  16  -4   3 6.37390 2.56726   6
 -16  -4  -3 5.81636 2.77806   5
 -16   4  -3 6.09493 1.88381   3
  16   4   3 5.36995 2.54641   6
 -16   4  -3 3.62579 3.15839   7
 -17  -4  -3 0.64367 1.59759   3
  17  -4   3 2.13600 2.23526   6
 -17  -4  -3 2.46740 1.74085   7
 -17  -4  -3 1.10704 2.31331   5
 -17   4  -3 -2.8627 2.16178   7
  17   4   3 -1.2811 1.86458   6
 -18  -4  -3 3.84334 1.94415   3
 -18  -4  -3 0.01482 2.89337   5
  18  -4   3 9.05484 4.09999   6
 -18  -4  -3 9.09239 2.66930   7
  18   4   3 13.2945 3.91800   6
 -18   4  -3 8.07200 4.55357   7
 -18  -5   3 31.6706 6.27129   5
 -18  -5   3 26.2449 4.46986   7
  18   5  -3 28.9172 4.42847   4
  18   5  -3 35.4931 5.49379   6
 -18   5   3 29.3900 6.01659   7
  17  -5  -3 8.46055 2.70331   6
 -17  -5   3 17.0967 3.36981   7
 -17  -5   3 18.6490 6.74010   5
  17   5  -3 16.0595 3.60126   4
  17   5  -3 23.6547 4.51468   6
 -17   5   3 17.8067 4.97556   7
 -16  -5   3 213.101 12.8146   5
  16  -5  -3 229.616 11.1742   6
 -16  -5   3 231.826 10.0023   7
 -16  -5   3 224.180 7.22629   3
  16   5  -3 240.565 11.9376   6
 -16   5   3 227.317 13.7954   7
  16   5  -3 213.311 10.6989   4
  15  -5  -3 162.441 9.02218   6
 -15  -5   3 150.273 7.67075   7
 -15  -5   3 154.871 10.4321   5
 -15  -5   3 166.212 6.29208   3
 -15  -5   3 157.015 6.80593   3
 -15   5   3 164.041 10.9687   7
  15   5  -3 172.043 9.17545   4
  15   5  -3 173.874 9.72479   6
 -14  -5   3 83.9858 5.24106   7
  14  -5  -3 71.8139 5.61328   6
 -14  -5   3 84.3203 7.17894   5
 -14  -5   3 73.0418 4.13374   3
 -14  -5   3 68.1575 4.52437   3
 -14   5   3 82.2229 7.50655   7
  14   5  -3 82.9957 6.56378   6
  14   5  -3 77.0106 5.88539   4
  13  -5  -3 168.571 8.50220   6
 -13  -5   3 172.372 7.26854   3
 -13  -5   3 180.179 6.85976   3
 -13  -5   3 179.128 7.59924   7
 -13  -5   3 177.516 10.1695   5
 -13   5   3 163.090 10.4588   7
  13   5  -3 171.903 8.88719   4
  13   5  -3 181.110 9.40024   6
 -12  -5   3 28.5596 2.73114   3
  12  -5  -3 25.2928 3.47474   6
 -12  -5   3 28.7480 4.77971   5
 -12  -5   3 22.6290 2.68074   7
 -12  -5   3 24.6706 2.75249   3
 -12   5   3 27.2075 4.09513   6
 -12   5   3 19.3695 3.62962   7
  12   5  -3 26.0199 3.69183   4
  12   5  -3 29.0304 4.46736   6
 -11  -5   3 129.484 5.66371   3
 -11  -5   3 130.216 7.80489   5
 -11  -5   3 127.377 6.05272   3
 -11  -5   3 125.556 6.49464   7
  11   5  -3 131.019 7.51616   6
 -11   5   3 131.212 8.53429   7
 -11   5   3 123.532 6.28457   6
  11   5  -3 133.197 7.32146   4
 -10  -5   3 133.243 6.15527   3
 -10  -5   3 132.849 5.51356   7
  10  -5  -3 121.944 5.82106   3
 -10  -5   3 134.841 5.78658   3
 -10  -5   3 136.261 7.61853   5
  10   5  -3 144.380 7.57764   6
 -10   5   3 126.895 6.11744   6
  10   5  -3 134.009 7.24227   4
 -10   5   3 139.290 8.44876   7
   9  -5  -3 123.230 5.62689   3
  -9  -5   3 123.649 6.85052   4
   9  -5  -3 123.190 8.56879   5
  -9  -5   3 129.444 5.10701   7
  -9  -5   3 123.089 5.44385   3
  -9  -5   3 131.772 7.06748   5
  -9  -5   3 125.445 5.83210   3
   9   5  -3 119.036 6.51151   3
   9   5  -3 112.311 6.54513   4
  -9   5   3 120.288 5.62777   6
  -9   5   3 126.472 7.77017   7
   9   5  -3 118.920 6.68162   6
   8  -5  -3 43.2512 3.72578   7
  -8  -5   3 50.6973 4.18327   5
  -8  -5   3 49.4364 2.88289   7
  -8  -5   3 52.8768 3.59133   3
  -8  -5   3 45.2088 3.25508   3
   8  -5  -3 46.5703 4.29546   5
   8  -5  -3 49.2323 3.37938   3
  -8  -5   3 39.6160 3.87487   4
  -8   5   3 46.9098 4.59791   7
   8   5  -3 49.4630 3.90815   3
  -8   5   3 49.9341 3.31398   6
  -7  -5   3 78.9966 5.03079   5
  -7  -5   3 88.2080 5.40298   4
  -7  -5   3 94.8883 4.59753   3
   7  -5  -3 88.3264 5.76145   5
  -7  -5   3 86.1954 4.63007   3
   7  -5  -3 81.0116 4.35484   3
  -7   5   3 95.5123 6.22713   7
  -7   5   3 90.3926 4.34831   6
   7   5  -3 87.1517 5.07867   3
   7   5  -3 91.8800 5.52234   4
   7   5  -3 91.9813 5.49505   6
   6  -5  -3 746.063 19.1376   3
   6  -5  -3 792.079 20.8979   7
  -6  -5   3 751.178 20.2182   5
  -6  -5   3 737.273 20.6774   4
  -6  -5   3 723.845 19.2975   3
  -6   5   3 728.083 18.4999   6
  -6   5   3 753.748 21.8269   7
   6   5  -3 767.851 20.7695   4
   6   5  -3 712.663 20.0135   3
   5  -5  -3 911.005 20.0899   4
   5  -5  -3 877.773 22.1379   3
  -5  -5   3 875.691 23.5581   4
  -5  -5   3 885.342 22.4285   3
  -5  -5   3 896.423 22.3189   3
  -5  -5   3 880.848 22.9661   5
  -5  -5   3 926.370 21.6856   7
   5  -5  -3 929.666 23.8058   7
  -5   5   3 886.479 21.5270   6
  -5   5   3 913.234 20.1523   4
  -5   5   3 927.983 24.7658   7
   5   5  -3 906.136 23.6150   4
   5   5  -3 861.885 22.9885   3
  -4  -5   3 232.245 8.70844   4
  -4  -5   3 231.928 8.05188   3
   4  -5  -3 237.659 6.73060   4
  -4  -5   3 236.182 7.44883   7
  -4  -5   3 231.358 7.99650   3
   4  -5  -3 237.126 8.88127   7
   4  -5  -3 232.019 7.90620   3
   4   5  -3 225.062 8.40599   3
  -4   5   3 233.536 7.44665   6
  -4   5   3 231.059 6.69764   4
   4   5  -3 216.560 8.81457   4
  -4   5   3 211.908 10.4696   7
  -3  -5   3 41.0418 2.66513   7
   3  -5  -3 41.8393 2.88968   3
   3  -5  -3 42.4796 3.29636   7
  -3  -5   3 43.8629 3.11991   3
  -3  -5   3 47.1055 3.37639   4
  -3  -5   3 45.5604 3.05743   3
   3  -5  -3 38.3811 2.37250   4
   3   5  -3 41.9186 3.10889   3
  -3   5   3 41.5609 2.43857   4
   3   5  -3 43.3198 3.33319   4
  -3   5   3 45.3178 3.63743   7
   2  -5  -3 0.89392 0.80797   3
   2  -5  -3 2.05718 0.78920   4
   2  -5  -3 1.96335 0.83750   3
  -2  -5   3 1.25428 0.88043   3
  -2  -5   3 1.95020 0.82203   7
   2  -5  -3 1.77586 1.08085   7
  -2  -5   3 1.99757 0.89072   3
  -2  -5   3 0.30797 0.65551   4
  -2   5   3 1.17082 0.98847   7
   2   5  -3 1.05305 0.88266   4
   2   5  -3 1.49840 0.89421   3
  -2   5   3 1.60127 0.72907   4
  -1  -5   3 394.489 11.3974   3
  -1  -5   3 396.703 11.8156   3
   1  -5  -3 389.435 12.0832   7
   1  -5  -3 389.919 11.0195   4
  -1  -5   3 388.259 11.6126   4
   1  -5  -3 395.062 11.8356   3
   1  -5  -3 374.254 11.2835   3
  -1  -5   3 381.515 10.9788   7
  -1   5   3 384.443 12.1671   7
   1   5  -3 375.276 11.6479   4
   1   5  -3 407.035 11.3483   7
  -1   5   3 383.233 10.8849   4
   0  -5   3 330.904 10.0935   4
   0  -5  -3 330.617 10.4370   3
   0  -5  -3 326.526 10.1373   3
   0  -5   3 330.254 10.5761   3
   0  -5   3 330.902 9.90963   7
   0  -5  -3 326.890 9.96860   4
   0  -5  -3 320.452 10.5970   7
   0  -5   3 327.912 9.99916   3
   0   5  -3 324.020 10.1282   7
   0   5  -3 331.786 10.2093   4
   0   5   3 320.856 9.83343   4
   1  -5   3 919.405 22.7418   3
  -1  -5  -3 946.745 23.0793   4
  -1  -5  -3 958.944 23.4058   3
  -1  -5  -3 959.337 23.5848   7
   1  -5   3 899.625 23.6801   4
   1  -5   3 928.302 22.8400   7
   1  -5   3 945.425 23.5510   3
  -1   5  -3 923.836 23.1839   3
   1   5   3 912.554 22.8289   4
  -1   5  -3 923.593 22.6967   4
   1   5   3 913.418 23.0985   3
  -1   5  -3 938.670 23.3470   7
  -2  -5  -3 1262.51 30.2042   4
   2  -5   3 1217.75 29.5183   3
   2  -5   3 1293.81 30.0074   7
  -2  -5  -3 1218.57 30.0005   3
   2  -5   3 1243.18 28.9638   4
  -2  -5  -3 1269.23 30.3154   7
   2   5   3 1230.60 30.1608   3
  -2   5  -3 1300.32 29.4009   4
  -2   5  -3 1283.27 30.1733   3
  -2   5  -3 1260.20 30.6167   7
   2   5   3 1282.09 30.1297   4
   3  -5   3 863.148 21.0451   3
   3  -5   3 836.530 21.3284   7
   3  -5   3 839.538 19.9535   4
  -3  -5  -3 822.233 21.6962   4
  -3  -5  -3 852.496 21.4401   3
  -3   5  -3 848.778 21.4544   3
   3   5   3 807.819 21.5006   3
  -3   5  -3 832.013 20.9387   6
  -3   5  -3 837.116 20.2558   4
   3   5   3 827.478 21.6209   4
  -3   5  -3 836.706 22.2019   7
  -4  -5  -3 355.424 11.0008   3
   4  -5   3 350.114 11.0830   7
   4  -5   3 332.865 10.4081   3
  -4  -5  -3 349.182 11.4836   4
  -4   5  -3 345.150 10.5009   6
  -4   5  -3 351.515 9.76679   4
  -4   5  -3 325.331 11.1767   3
  -4   5  -3 346.064 13.4823   7
   4   5   3 339.427 11.2000   3
   4   5   3 346.912 11.3387   4
   5  -5   3 41.3533 3.00204   3
  -5  -5  -3 36.4270 3.17258   5
   5  -5   3 42.0647 3.33231   7
  -5  -5  -3 35.6710 3.23837   4
  -5  -5  -3 42.0453 3.28676   3
  -5   5  -3 39.7632 3.02918   6
[truncated: 2,390,682 more chars]
